# Supplementary material
Source: bioRxiv or medRxiv preprint supplement (https://www.biorxiv.org/highwire/filestream/102272/field_highwire_adjunct_files/0/335372-1.pdf)
Supplement: Supplementary file [file 335372-1.pdf]

# Custom array sequence generation

*Tomas Bjorklund*

*Wed Nov 1 10:28:10 2017*

This script generates all unique AA sequences for the CustomArray production

```
suppressPackageStartupMessages(library(knitr))
```

## Loading source files

```
source(file.path("functions", "AAtoDNA.R"))
source(file.path("functions", "GeneCodon.R"))
# Override the GeneCodon function with local version containing human codons
unlockBinding("GeneCodon", as.environment("package:GeneGA"))
assign("GeneCodon", GeneCodon, as.environment("package:GeneGA"))

allSequences <- readFasta("input/DNA-lib_RetrogradeTransport.fasta")
AAlist <- data.frame(Class = character(), Family = character(), Strain = character(),
  Note = character(), Number = character(), Name = character(), AAfragment = character(),
  stringsAsFactors = FALSE)

# allSequences <- allSequences[124:129] #Debug row
```

## Generation of AA table for the selected proteins

```
strt <- Sys.time()
for (i in 1:length(allSequences)) {
  thisID <- as.character(ShortRead::id(allSequences[i]))
  thisSeq <- sread(allSequences[i])
  thisAA <- Biostrings::translate(thisSeq, genetic.code = GENETIC_CODE, if.fuzzy.codon = "solve")
  AAlist[i, c("Class", "Family", "Strain", "Note", "Number", "Name", "AAfragment")] <- c(BBmisc::explode(
    sep = ","), as.character(thisAA))
}
```

## The generateFragments function

```
generateFragments <- function(minLength, maxLength, frequency = 1) {
  # Generate a table to store all AA sequences
  fragList <- data.frame(Class = character(), Family = character(), Strain = character(),
    Note = character(), Number = character(), Name = character(), AAlist = integer(),
    AAstart = integer(), AAfragment = character(), stringsAsFactors = FALSE)

  makeAllFrag <- function(k) {
    thisFullAA <- AAlist[k, "AAfragment"]
    count = length(fragList[, 1]) + 1
    for (l in seq(1, (width(thisFullAA) - minLength), frequency)) {
      for (m in (1 + minLength - 1):(min(1 + maxLength - 1, width(thisFullAA)))) {
```

```

# Truncate string to the relevant fragment:
thisFragment <- substr(thisFullAA, l, m)
# Take away any sequence that starts with a start codon ATG:
if (substr(thisFragment, 1, 1) != "M") {
  fragList[count, c("Class", "Family", "Strain", "Note", "Number",
    "Name", "AAstart", "AAstop", "AAfragment")] <- c(AAlist[k,
    c("Class", "Family", "Strain", "Note", "Number", "Name")],
    l, m, thisFragment)
  ## Inserts the fragment with information into the new data frame
  count <- count + 1
}
}
}
return(fragList)
}

fragList <- do.call(rbind, mclapply(1:length(AAlist[, 1]), makeAllFrag,
  mc.preschedule = TRUE, mc.cores = detectCores()))

# Control if any sequences contain non-AA characters and save them into a
# separate list
discardList <- fragList[grepl("[:punct:]|X", fragList[, "AAfragment"]),
]

# Remove any sequence containing non AA characters
fragList <- fragList[grepl("[:punct:]|X", fragList[, "AAfragment"], invert = TRUE),
]

# Sort the fragments, find unique strings and count number of duplicates
sortedFragments <- rev(sort(table(fragList[, "AAfragment"])))

# Run the AAtodNA function to convert all AA sequences to human
# codon-optimized DNA sequences
row.names(sortedFragments) <- mclapply(row.names(sortedFragments), fullopt = FALSE,
  species = "hsa", AAtodNA, mc.preschedule = TRUE, mc.set.seed = TRUE,
  mc.silent = FALSE, mc.cores = detectCores(), mc.cleanup = TRUE) #

sortedFragments <- sortedFragments[order(row.names(sortedFragments))]

return(sortedFragments)
}

```

## Execution of the function

```
sortedFragments.14aa <- generateFragments(14, 14, 1)
```

Add the overhangs for amplification PCR and Gibson assembly into the AAV plasmid

```
fivePrime <- tolower("AACCTCCAGAGAGGCAACGCT")
threePrime <- tolower("GCCAGACAAGCAGCTACCGCA")
row.names(sortedFragments.14aa) <- paste(fivePrime, row.names(sortedFragments.14aa),
  threePrime, sep = "")
```

```
sortedFragments.14aa.G4S <- generateFragments(14, 14, 3)
sortedFragments.14aa.A5 <- sortedFragments.14aa.G4S
```

Add the overhangs including G4S spacers for amplification PCR and Gibson assembly into the AAV plasmid

```
fivePrime <- tolower("AACCTCCAGAGAGGCAACGGAGGCGGAGGAAGT")
threePrime <- tolower("GGAGGCGGCGGAAGCAGACAAGCAGCTACCGCA")
row.names(sortedFragments.14aa.G4S) <- paste(fivePrime, row.names(sortedFragments.14aa.G4S),
      threePrime, sep = "")
```

Add the overhangs including A5 spacers for amplification PCR and Gibson assembly into the AAV plasmid

```
fivePrime <- tolower("AACCTCCAGAGAGGCAACGCTGCTGCAGCAGCC")
threePrime <- tolower("GCAGCTGCAGCTGCCAGACAAGCAGCTACCGCA")
row.names(sortedFragments.14aa.A5) <- paste(fivePrime, row.names(sortedFragments.14aa.A5),
      threePrime, sep = "")
```

Generate 22aa fragments

```
sortedFragments.22aa <- generateFragments(22, 22, 3)
```

Add the overhangs for amplification PCR and Gibson assembly into the AAV plasmid

```
fivePrime <- tolower("AACCTCCAGAGAGGCAACGCT")
threePrime <- tolower("GCCAGACAAGCAGCTACCGCA")
row.names(sortedFragments.22aa) <- paste(fivePrime, row.names(sortedFragments.22aa),
      threePrime, sep = "")
```

Merge all separate fragment lists into one complete list

```
sortedFragments <- c(sortedFragments.22aa, sortedFragments.14aa, sortedFragments.14aa.A5,
      sortedFragments.14aa.G4S)
```

```
print(paste("Number of unique fragments:", length(unique(names(sortedFragments))),
      sep = " "))
```

```
[1] "Number of unique fragments: 92343"
```

```
write.table(c("Sequence", unique(names(sortedFragments))), "data/SortedFragments_all.txt",
      row.names = F, col.names = F, quote = F, sep = "\t")
```

```
print(Sys.time() - strt)
```

Time difference of 2.421197 mins

```
devtools::session_info()
```

Session info -----

```
setting  value
version  R version 3.4.2 (2017-09-28)
system   x86_64, linux-gnu
ui       X11
language (EN)
collate  en_US.UTF-8
tz       UTC
date     2017-11-01
```

Packages -----

| package   | * version | date       | source         |
|-----------|-----------|------------|----------------|
| acepack   | 1.4.1     | 2016-10-29 | CRAN (R 3.4.2) |
| ade4      | 1.7-8     | 2017-08-09 | CRAN (R 3.4.2) |
| backports | 1.1.1     | 2017-09-25 | CRAN (R 3.4.2) |
| base      | * 3.4.2   | 2017-10-06 | local          |
| base64enc | 0.1-3     | 2015-07-28 | CRAN (R 3.4.2) |

|                   |           |            |                |
|-------------------|-----------|------------|----------------|
| BBmisc            | 1.11      | 2017-03-10 | CRAN (R 3.4.2) |
| Biobase           | * 2.36.2  | 2017-10-13 | Bioconductor   |
| BiocGenerics      | * 0.22.1  | 2017-10-13 | Bioconductor   |
| BiocParallel      | * 1.10.1  | 2017-10-13 | Bioconductor   |
| Biostrings        | * 2.44.2  | 2017-10-13 | Bioconductor   |
| bitops            | 1.0-6     | 2013-08-17 | CRAN (R 3.4.2) |
| checkmate         | 1.8.4     | 2017-09-25 | CRAN (R 3.4.2) |
| cluster           | 2.0.6     | 2017-03-16 | CRAN (R 3.4.2) |
| colorspace        | 1.3-2     | 2016-12-14 | CRAN (R 3.4.2) |
| compiler          | 3.4.2     | 2017-10-06 | local          |
| data.table        | 1.10.4-2  | 2017-10-12 | CRAN (R 3.4.2) |
| datasets          | * 3.4.2   | 2017-10-06 | local          |
| DelayedArray      | * 0.2.7   | 2017-10-13 | Bioconductor   |
| devtools          | * 1.13.3  | 2017-08-02 | CRAN (R 3.4.2) |
| digest            | 0.6.12    | 2017-01-27 | CRAN (R 3.4.2) |
| evaluate          | 0.10.1    | 2017-06-24 | CRAN (R 3.4.2) |
| foreign           | 0.8-69    | 2017-06-21 | CRAN (R 3.4.2) |
| formatR           | 1.5       | 2017-04-25 | CRAN (R 3.4.2) |
| Formula           | * 1.2-2   | 2017-07-10 | CRAN (R 3.4.2) |
| GeneGA            | * 1.26.0  | 2017-10-13 | Bioconductor   |
| GenomeInfoDb      | * 1.12.3  | 2017-10-13 | Bioconductor   |
| GenomeInfoDbData  | 0.99.0    | 2017-10-13 | Bioconductor   |
| GenomicAlignments | * 1.12.2  | 2017-10-13 | Bioconductor   |
| GenomicRanges     | * 1.28.6  | 2017-10-13 | Bioconductor   |
| ggplot2           | * 2.2.1   | 2016-12-30 | CRAN (R 3.4.2) |
| graphics          | * 3.4.2   | 2017-10-06 | local          |
| grDevices         | * 3.4.2   | 2017-10-06 | local          |
| grid              | 3.4.2     | 2017-10-06 | local          |
| gridExtra         | 2.3       | 2017-09-09 | CRAN (R 3.4.2) |
| gtable            | 0.2.0     | 2016-02-26 | CRAN (R 3.4.2) |
| hash              | * 2.2.6   | 2013-02-21 | CRAN (R 3.4.2) |
| Hmisc             | * 4.0-3   | 2017-05-02 | CRAN (R 3.4.2) |
| hms               | 0.3       | 2016-11-22 | CRAN (R 3.4.2) |
| htmlTable         | 1.9       | 2017-01-26 | CRAN (R 3.4.2) |
| htmltools         | 0.3.6     | 2017-04-28 | CRAN (R 3.4.2) |
| htmlwidgets       | 0.9       | 2017-07-10 | CRAN (R 3.4.2) |
| httr              | 1.3.1     | 2017-08-20 | CRAN (R 3.4.2) |
| hwriter           | 1.3.2     | 2014-09-10 | CRAN (R 3.4.2) |
| IRanges           | * 2.10.5  | 2017-10-13 | Bioconductor   |
| kableExtra        | * 0.5.2   | 2017-09-15 | CRAN (R 3.4.2) |
| knitr             | * 1.17    | 2017-08-10 | CRAN (R 3.4.2) |
| lattice           | * 0.20-35 | 2017-03-25 | CRAN (R 3.4.2) |
| latticeExtra      | 0.6-28    | 2016-02-09 | CRAN (R 3.4.2) |
| lazyeval          | 0.2.0     | 2016-06-12 | CRAN (R 3.4.2) |
| magrittr          | 1.5       | 2014-11-22 | CRAN (R 3.4.2) |
| Matrix            | 1.2-11    | 2017-08-16 | CRAN (R 3.4.2) |
| matrixStats       | * 0.52.2  | 2017-04-14 | CRAN (R 3.4.2) |
| memoise           | 1.1.0     | 2017-04-21 | CRAN (R 3.4.2) |
| methods           | * 3.4.2   | 2017-10-06 | local          |
| munsell           | 0.4.3     | 2016-02-13 | CRAN (R 3.4.2) |
| nnet              | 7.3-12    | 2016-02-02 | CRAN (R 3.4.2) |
| parallel          | * 3.4.2   | 2017-10-06 | local          |
| plyr              | 1.8.4     | 2016-06-08 | CRAN (R 3.4.2) |
| R6                | 2.2.2     | 2017-06-17 | CRAN (R 3.4.2) |
| RColorBrewer      | 1.1-2     | 2014-12-07 | CRAN (R 3.4.2) |
| Rcpp              | 0.12.13   | 2017-09-28 | CRAN (R 3.4.2) |
| RCurl             | 1.95-4.8  | 2016-03-01 | CRAN (R 3.4.2) |

|                      |          |            |                |
|----------------------|----------|------------|----------------|
| readr                | 1.1.1    | 2017-05-16 | CRAN (R 3.4.2) |
| rlang                | 0.1.2    | 2017-08-09 | CRAN (R 3.4.2) |
| rmarkdown            | 1.6      | 2017-06-15 | CRAN (R 3.4.2) |
| rpart                | 4.1-11   | 2017-04-21 | CRAN (R 3.4.2) |
| rprojroot            | 1.2      | 2017-01-16 | CRAN (R 3.4.2) |
| Rsamtools            | * 1.28.0 | 2017-10-13 | Bioconductor   |
| rvest                | 0.3.2    | 2016-06-17 | CRAN (R 3.4.2) |
| S4Vectors            | * 0.14.7 | 2017-10-13 | Bioconductor   |
| scales               | 0.5.0    | 2017-08-24 | CRAN (R 3.4.2) |
| seqinr               | * 3.4-5  | 2017-08-01 | CRAN (R 3.4.2) |
| ShortRead            | * 1.34.2 | 2017-10-13 | Bioconductor   |
| splines              | 3.4.2    | 2017-10-06 | local          |
| stats                | * 3.4.2  | 2017-10-06 | local          |
| stats4               | * 3.4.2  | 2017-10-06 | local          |
| stringi              | 1.1.5    | 2017-04-07 | CRAN (R 3.4.2) |
| stringr              | 1.2.0    | 2017-02-18 | CRAN (R 3.4.2) |
| SummarizedExperiment | * 1.6.5  | 2017-10-13 | Bioconductor   |
| survival             | * 2.41-3 | 2017-04-04 | CRAN (R 3.4.2) |
| tibble               | 1.3.4    | 2017-08-22 | CRAN (R 3.4.2) |
| tools                | 3.4.2    | 2017-10-06 | local          |
| utils                | * 3.4.2  | 2017-10-06 | local          |
| withr                | 2.0.0    | 2017-07-28 | CRAN (R 3.4.2) |
| xml2                 | 1.1.1    | 2017-01-24 | CRAN (R 3.4.2) |
| XVector              | * 0.16.0 | 2017-10-13 | Bioconductor   |
| yaml                 | 2.1.14   | 2016-11-12 | CRAN (R 3.4.2) |
| zlibbioc             | 1.22.0   | 2017-10-13 | Bioconductor   |

# Extraction of Barcodes and gene fragments

*Tomas Bjorklund*

*Wed Nov 1 10:30:45 2017*

This workflow extracts barcodes and the gene fragments synthesized with the CustomArray using bbmap2. The fragments are then suitable for alignment to reference sequences using blastn.

```
suppressPackageStartupMessages(library(knitr))
```

## Sequencing files

```
dataDir <- config$Value[1]
in.name.P5 <- file.path(dataDir, config$Value[2])
in.name.P7 <- file.path(dataDir, config$Value[3])
name.out <- config$Value[4]
paired.alignment <- as.logical(config$Value[5])
```

## Analysis parameters

```
knitr::kable(config, format = "latex", booktabs = T) %>% kable_styling(latex_options = "striped")
```

| Parameter        | Value                     |
|------------------|---------------------------|
| dataDir          | seqFiles                  |
| in.name.P5       | DNA_pscAAVlib_R1.fastq.gz |
| in.name.P7       | DNA_pscAAVlib_R2.fastq.gz |
| name.out         | AAVlibrary_complete       |
| paired.alignment | TRUE                      |
| run.subset       | FALSE                     |
| max.cores        | 32                        |
| subset.count     | 250000                    |

```
run.subset <- as.logical(config$Value[6])
max.cores <- as.integer(config$Value[7])
subset.count <- as.integer(config$Value[8])
```

```
strt <- Sys.time()
```

## Selection of real amplicons

```
# This section searches the sequencing file and only select the files with
# valid amplicons
out.name.P5 <- tempfile(pattern = "P5_", tmpdir = tempdir(), fileext = ".fastq.gz")
out.name.P7 <- tempfile(pattern = "P7_", tmpdir = tempdir(), fileext = ".fastq.gz")
command.args <- paste("overwrite=true k=15 rcomp=f skipr2=t qhdist=0 maskmiddle=f",
  " hammingdistance=2 findbestmatch=f ordered=t threads=", detectCores(),
  " in=", in.name.P5, " in2=", in.name.P7, " outm=", out.name.P5, " outm2=",
```

```

out.name.P7, " fliteral=", "GTATGTTGTTCTGGAGCGGGAGGGTCTATTTTGCCTAGCGATAA",
sep = "")

sys.out <- system2(path.expand("~/bbmap/bbduk2.sh"), args = command.args, stdout = TRUE,
stderr = TRUE)

sys.out <- as.data.frame(sys.out)

colnames(sys.out) <- c("bbduk2 Identification of real amplicons")
invisible(sys.out[" "] <- " ")
lengthOut <- (nrow(sys.out))
knitr::kable(sys.out[3:lengthOut, ], format = "latex", booktabs = T) %>% kable_styling(latex_options = "str

```

| bbduk2 Identification of real amplicons |                                                                  |
|-----------------------------------------|------------------------------------------------------------------|
| 3                                       |                                                                  |
| 4                                       | BBDuk2 version 37.02                                             |
| 5                                       | Set ORDERED to true                                              |
| 6                                       | Set threads to 32                                                |
| 7                                       | k=15                                                             |
| 8                                       | hamming distance=2                                               |
| 9                                       | kfiltering using 1 literal.                                      |
| 10                                      |                                                                  |
| 11                                      | Initial:                                                         |
| 12                                      | Memory: max=77002m, free=74592m, used=2410m                      |
| 13                                      |                                                                  |
| 14                                      | Added 30721 kmers; time: 0.072 seconds.                          |
| 15                                      | Memory: max=77002m, free=71779m, used=5223m                      |
| 16                                      |                                                                  |
| 17                                      | Input is being processed as paired                               |
| 18                                      | Started output streams: 0.130 seconds.                           |
| 19                                      | Processing time: 108.946 seconds.                                |
| 20                                      |                                                                  |
| 21                                      | Input: 23191088 reads 3490215687 bases.                          |
| 22                                      | Contaminants: 23095890 reads (99.59%) 3475908371 bases (99.59%)  |
| 23                                      | Total Removed: 23095890 reads (99.59%) 3475908371 bases (99.59%) |
| 24                                      | Result: 95198 reads (0.41%) 14307316 bases (0.41%)               |
| 25                                      |                                                                  |
| 26                                      | Time: 109.162 seconds.                                           |
| 27                                      | Reads Processed: 23191k 212.45k reads/sec                        |
| 28                                      | Bases Processed: 3490m 31.97m bases/sec                          |

```

in.name.P5 <- out.name.P5
in.name.P7 <- out.name.P7

```

## Extraction of a subset

```

if (run.subset) {
  suppressWarnings(sampler <- FastqSampler(gsub("[\\]]", "", in.name.P5),
    subset.count, readerBlockSize = 1e+09, ordered = TRUE))
  set.seed(123)
  tmp.P5 <- yield(sampler)
  in.name.P5 <- tempfile(pattern = "P5_", tmpdir = tempdir(), fileext = ".fastq.gz")
}

```

```

writeFastq(tmp.P5, in.name.P5, compress = TRUE)
rm(tmp.P5)
suppressWarnings(sampler <- FastqSampler(gsub("([\\])", "", in.name.P7),
  subset.count, readerBlockSize = 1e+09, ordered = TRUE))
set.seed(123)
tmp.P7 <- yield(sampler)
in.name.P7 <- tempfile(pattern = "P7_", tmpdir = tempdir(), fileext = ".fastq.gz")
writeFastq(tmp.P7, in.name.P7, compress = TRUE)
rm(tmp.P7)
}

output.Reads <- as.integer(system(paste("gunzip -c ", shQuote(gsub("([\\])",
  "", in.name.P5)), " | echo $((`wc -l`/4)) 2>&1", sep = ""), intern = TRUE,
  ignore.stdout = FALSE)) #Stores the read count utilized
print(paste("Utilized sequences:", output.Reads))

```

```
[1] "Utilized sequences: 11547945"
```

## Extraction of barcodes

```

out.name.P5 <- tempfile(pattern = "BC_", tmpdir = tempdir(), fileext = ".fastq.gz")

sys.out <- system(paste("~/bbmap/bbduk2.sh overwrite=true k=18 mink=18 hammingdistance=2 findbestmatch=t ",
  "rcomp=f findbestmatch=f qhdist=1 minavgquality=0 maxns=0 minlength=18 ",
  "maxlength=22 threads=", detectCores(), " in=", shQuote(in.name.P5), " out=",
  out.name.P5, " lliteral=", "GGCCTAGCGCCGCTTACTT", " rliteral=", "ATAACTTCGTATAATGTATGC",
  " 2>&1", sep = ""), intern = TRUE, ignore.stdout = FALSE)
sys.out <- as.data.frame(sys.out)

in.name.P5 <- out.name.P5

colnames(sys.out) <- c("bbduk2 Extraction of barcodes")
invisible(sys.out[" "] <- " ")
lengthOut <- (nrow(sys.out))
knitr::kable(sys.out[3:lengthOut, ], format = "latex", booktabs = T) %>% kable_styling(latex_options = "strip")

rm(sys.out)

reads.BC <- readFastq(in.name.P5)
sread(reads.BC)

```

```

A DNAStrngSet instance of length 11374106
width seq
 [1] 20 AAGTAATTGTGGCAGGAAGT
 [2] 20 GTTGGCGTGTGTCCTTATCC
 [3] 20 GCGCCAATGCGTGTAGCTGT
 [4] 20 CTTGATTGCTTGATGGCCTC
 [5] 20 GAATATTGGTGCATTCCTT
 ... ..
[11374102] 20 GCGCGTTGATGGGTTGGCTC
[11374103] 20 CAGGCCTGAATGGCGGGCGG
[11374104] 20 GTTTGCTAGTTCCCGGGTAC
[11374105] 20 CAGGGCGGGTGTGCAGGCGG
[11374106] 20 GTACGTTCCGTCATATTG

```



---

```

bbduk2 Extraction of barcodes
3
4 BBDuk2 version 37.02
5 Set threads to 32
6 k=18
7 maskMiddle=true
8 hamming distance=2
9 right-ktrimming using 1 literal.
10 left-ktrimming using 1 literal.
11
12 Initial:
13 Memory: max=76982m, free=73767m, used=3215m
14
15 Added 5104 kmers; time: 0.044 seconds.
16 Memory: max=76982m, free=70955m, used=6027m
17
18 Added 5104 kmers; time: 0.010 seconds.
19 Memory: max=76982m, free=70955m, used=6027m
20
21 Input is being processed as unpaired
22 Started output streams: 0.082 seconds.
23 Processing time: 212.211 seconds.
24
25 Input: 11547945 reads 1738273591 bases.
26 KTrimmed: 23030031 reads (199.43%) 1505373909 bases (86.60%)
27 Low quality discards: 6 reads (0.00%) 122 bases (0.00%)
28 Total Removed: 173839 reads (1.51%) 1511015923 bases (86.93%)
29 Result: 11374106 reads (98.49%) 227257668 bases (13.07%)
30
31 Time: 212.365 seconds.
32 Reads Processed: 11547k 54.38k reads/sec
33 Bases Processed: 1738m 8.19m bases/sec

```

---

```
(unique.BCs <- unique(sread(reads.BC)))
```

```

A DNASTringSet instance of length 3934570
width seq
 [1] 20 AAGTAATTGTGGCAGGAAGT
 [2] 20 GTTGGCGTGTGTCCTTATCC
 [3] 20 GCGCCAATGCGTGTAGCTGT
 [4] 20 CTTGATTGCTTGATGGCCTC
 [5] 20 GAATATTGGTGCATTCCCTT
 ...
 [3934566] 20 GCTCCCGGAAGCTTCCCGT
 [3934567] 20 AAATACTGGCTGATAACCTG
 [3934568] 20 GCATCCTTATTTTCATGCTTT
 [3934569] 20 GCGCGCTGATGTGTTCCGGG
 [3934570] 20 GTTTGCTAGTTCCTCCGGGTAC

```

```

output.BCs <- length(unique.BCs)
print(paste("Utilized barcodes:", output.BCs))

```

```
[1] "Utilized barcodes: 3934570"
```

```
barcodeTable <- data.table(ID = as.character(ShortRead::id(reads.BC)), BC = as.character(sread(reads.BC)))
```

## Extraction of fragments

```
out.name.P7 <- tempfile(pattern = "P7_", tmpdir = tempdir(), fileext = ".fastq.gz")
command.args <- paste("overwrite=true k=18 mink=18 rcomp=f qhdist=1 maskmiddle=t",
  " hammingdistance=2 findbestmatch=t minlength=38 maxlength=78 ordered=t ",
  "threads=", detectCores(), " in=", in.name.P7, " out=", out.name.P7, " lliteral=",
  "AGCAACCTCCAGAGAGGCAACG", " rliteral=", "CAGACAAGCAGCTACCGCAGAT", sep = "")

sys.out <- system2(path.expand("~/bbmap/bbduk2.sh"), args = command.args, stdout = TRUE,
  stderr = TRUE) #

sys.out <- as.data.frame(sys.out)

colnames(sys.out) <- c("bbduk2 extraction of fragments")
invisible(sys.out[" "] <- " ")
lengthOut <- (nrow(sys.out))
knitr::kable(sys.out[3:lengthOut, ], format = "latex", booktabs = T) %>% kable_styling(latex_options = "str

in.name.P7 <- out.name.P7

out.name.P5 <- tempfile(pattern = "P5_", tmpdir = tempdir(), fileext = ".fastq.gz")
out.name.P7 <- tempfile(pattern = "P7_", tmpdir = tempdir(), fileext = ".fastq.gz")
out.name.P5_singlet <- tempfile(pattern = "P5_singlet_", tmpdir = tempdir(),
  fileext = ".fastq.gz")
out.name.P7_singlet <- tempfile(pattern = "P7_singlet_", tmpdir = tempdir(),
  fileext = ".fastq.gz")

command.args <- paste("makepairs -c 'gzip' -f ", in.name.P5, " -r ", in.name.P7,
  " -fp ", out.name.P5, " -rp ", out.name.P7, " -fs ", out.name.P5_singlet,
  " -rs ", out.name.P7_singlet, " --stats 2>&1", sep = "")
sys.out <- system2("/usr/local/bin/pairfq", args = command.args, stdout = TRUE,
  stderr = TRUE)
sys.out <- as.data.frame(sys.out)

colnames(sys.out) <- c("pairfq pair matching")
invisible(sys.out[" "] <- " ")
lengthOut <- (nrow(sys.out))
knitr::kable(sys.out[1:lengthOut, ], format = "latex", booktabs = T) %>% kable_styling(latex_options = "str

rm(sys.out)

system(paste("mv ", out.name.P5, " ./data/barcodes_", name.out, ".fastq.gz",
  sep = ""))
system(paste("mv ", out.name.P7, " ./data/fragments_", name.out, ".fastq.gz",
  sep = ""))

unlink(paste(tempdir(), "/*", sep = ""), recursive = FALSE, force = FALSE) #Cleanup of temp files

print("Total execution time:")

[1] "Total execution time:"
```

---

```

bbduk2 extraction of fragments
3
4 BBDuk2 version 37.02
5 Set ORDERED to true
6 Set threads to 32
7 k=18
8 maskMiddle=true
9 hamming distance=2
10 right-ktrimming using 1 literal.
11 left-ktrimming using 1 literal.
12
13 Initial:
14 Memory: max=75573m, free=72417m, used=3156m
15
16 Added 6380 kmers; time: 0.070 seconds.
17 Memory: max=75573m, free=69657m, used=5916m
18
19 Added 6380 kmers; time: 0.002 seconds.
20 Memory: max=75573m, free=69657m, used=5916m
21
22 Input is being processed as unpaired
23 Started output streams: 0.090 seconds.
24 Processing time: 232.650 seconds.
25
26 Input: 11547945 reads 1737634780 bases.
27 KTrimmed: 22321617 reads (193.30%) 1078844314 bases (62.09%)
28 Total Removed: 698793 reads (6.05%) 1146258928 bases (65.97%)
29 Result: 10849152 reads (93.95%) 591375852 bases (34.03%)
30
31 Time: 232.830 seconds.
32 Reads Processed: 11547k 49.60k reads/sec
33 Bases Processed: 1737m 7.46m bases/sec

```

---



---

pairfq pair matching

---

```

===== pairfq version : 0.17.0 (completion time: Wed Nov 1 10:47:44 UTC 2017)
Total forward reads (/tmp/RtmpmemuBF/BC_2162781c3c.fastq.gz) : 11374106
Total reverse reads (/tmp/RtmpmemuBF/P7_2161be9256f.fastq.gz) : 10849152
Total forward paired reads (/tmp/RtmpmemuBF/P5_21663064762.fastq.gz) : 10698072
Total reverse paired reads (/tmp/RtmpmemuBF/P7_2162b7ef9d1.fastq.gz) : 10698072

Total forward unpaired reads (/tmp/RtmpmemuBF/P5_singlet_2161f485577.fastq.gz) : 676034
Total reverse unpaired reads (/tmp/RtmpmemuBF/P7_singlet_216961813b.fastq.gz) : 151080

Total paired reads : 21396144
Total unpaired reads : 827114

```

---

```
print(Sys.time() - strt)
```

```
Time difference of 16.88165 mins
```

```
devtools::session_info()
```

```
Session info -----
```

```

setting  value
version  R version 3.4.2 (2017-09-28)
system   x86_64, linux-gnu
ui       X11
language (EN)
collate  en_US.UTF-8
tz       UTC
date     2017-11-01

```

Packages -----

| package           | * version  | date       | source         |
|-------------------|------------|------------|----------------|
| acepack           | 1.4.1      | 2016-10-29 | CRAN (R 3.4.2) |
| backports         | 1.1.1      | 2017-09-25 | CRAN (R 3.4.2) |
| base              | * 3.4.2    | 2017-10-06 | local          |
| base64enc         | 0.1-3      | 2015-07-28 | CRAN (R 3.4.2) |
| Biobase           | * 2.36.2   | 2017-10-13 | Bioconductor   |
| BiocGenerics      | * 0.22.1   | 2017-10-13 | Bioconductor   |
| BiocParallel      | * 1.10.1   | 2017-10-13 | Bioconductor   |
| Biostrings        | * 2.44.2   | 2017-10-13 | Bioconductor   |
| bitops            | 1.0-6      | 2013-08-17 | CRAN (R 3.4.2) |
| checkmate         | 1.8.4      | 2017-09-25 | CRAN (R 3.4.2) |
| cluster           | 2.0.6      | 2017-03-16 | CRAN (R 3.4.2) |
| codetools         | 0.2-15     | 2016-10-05 | CRAN (R 3.4.2) |
| colorspace        | 1.3-2      | 2016-12-14 | CRAN (R 3.4.2) |
| compiler          | 3.4.2      | 2017-10-06 | local          |
| data.table        | * 1.10.4-2 | 2017-10-12 | CRAN (R 3.4.2) |
| datasets          | * 3.4.2    | 2017-10-06 | local          |
| DelayedArray      | * 0.2.7    | 2017-10-13 | Bioconductor   |
| devtools          | * 1.13.3   | 2017-08-02 | CRAN (R 3.4.2) |
| digest            | 0.6.12     | 2017-01-27 | CRAN (R 3.4.2) |
| doParallel        | * 1.0.11   | 2017-09-28 | CRAN (R 3.4.2) |
| evaluate          | 0.10.1     | 2017-06-24 | CRAN (R 3.4.2) |
| foreach           | * 1.4.3    | 2015-10-13 | CRAN (R 3.4.2) |
| foreign           | 0.8-69     | 2017-06-21 | CRAN (R 3.4.2) |
| formatR           | 1.5        | 2017-04-25 | CRAN (R 3.4.2) |
| Formula           | * 1.2-2    | 2017-07-10 | CRAN (R 3.4.2) |
| GenomeInfoDb      | * 1.12.3   | 2017-10-13 | Bioconductor   |
| GenomeInfoDbData  | 0.99.0     | 2017-10-13 | Bioconductor   |
| GenomicAlignments | * 1.12.2   | 2017-10-13 | Bioconductor   |
| GenomicRanges     | * 1.28.6   | 2017-10-13 | Bioconductor   |
| ggplot2           | * 2.2.1    | 2016-12-30 | CRAN (R 3.4.2) |
| graphics          | * 3.4.2    | 2017-10-06 | local          |
| grDevices         | * 3.4.2    | 2017-10-06 | local          |
| grid              | 3.4.2      | 2017-10-06 | local          |
| gridExtra         | 2.3        | 2017-09-09 | CRAN (R 3.4.2) |
| gtable            | 0.2.0      | 2016-02-26 | CRAN (R 3.4.2) |
| Hmisc             | * 4.0-3    | 2017-05-02 | CRAN (R 3.4.2) |
| hms               | 0.3        | 2016-11-22 | CRAN (R 3.4.2) |
| htmlTable         | 1.9        | 2017-01-26 | CRAN (R 3.4.2) |
| htmltools         | 0.3.6      | 2017-04-28 | CRAN (R 3.4.2) |
| htmlwidgets       | 0.9        | 2017-07-10 | CRAN (R 3.4.2) |
| httr              | 1.3.1      | 2017-08-20 | CRAN (R 3.4.2) |
| hwriter           | 1.3.2      | 2014-09-10 | CRAN (R 3.4.2) |
| IRanges           | * 2.10.5   | 2017-10-13 | Bioconductor   |
| iterators         | * 1.0.8    | 2015-10-13 | CRAN (R 3.4.2) |
| kableExtra        | * 0.5.2    | 2017-09-15 | CRAN (R 3.4.2) |
| knitr             | * 1.17     | 2017-08-10 | CRAN (R 3.4.2) |

|                      |           |            |              |           |
|----------------------|-----------|------------|--------------|-----------|
| lattice              | * 0.20-35 | 2017-03-25 | CRAN         | (R 3.4.2) |
| latticeExtra         | 0.6-28    | 2016-02-09 | CRAN         | (R 3.4.2) |
| lazyeval             | 0.2.0     | 2016-06-12 | CRAN         | (R 3.4.2) |
| magrittr             | 1.5       | 2014-11-22 | CRAN         | (R 3.4.2) |
| Matrix               | 1.2-11    | 2017-08-16 | CRAN         | (R 3.4.2) |
| matrixStats          | * 0.52.2  | 2017-04-14 | CRAN         | (R 3.4.2) |
| memoise              | 1.1.0     | 2017-04-21 | CRAN         | (R 3.4.2) |
| methods              | * 3.4.2   | 2017-10-06 | local        |           |
| munsell              | 0.4.3     | 2016-02-13 | CRAN         | (R 3.4.2) |
| nnet                 | 7.3-12    | 2016-02-02 | CRAN         | (R 3.4.2) |
| parallel             | * 3.4.2   | 2017-10-06 | local        |           |
| plyr                 | 1.8.4     | 2016-06-08 | CRAN         | (R 3.4.2) |
| R6                   | 2.2.2     | 2017-06-17 | CRAN         | (R 3.4.2) |
| RColorBrewer         | 1.1-2     | 2014-12-07 | CRAN         | (R 3.4.2) |
| Rcpp                 | 0.12.13   | 2017-09-28 | CRAN         | (R 3.4.2) |
| RCurl                | 1.95-4.8  | 2016-03-01 | CRAN         | (R 3.4.2) |
| readr                | 1.1.1     | 2017-05-16 | CRAN         | (R 3.4.2) |
| rlang                | 0.1.2     | 2017-08-09 | CRAN         | (R 3.4.2) |
| rmarkdown            | 1.6       | 2017-06-15 | CRAN         | (R 3.4.2) |
| rpart                | 4.1-11    | 2017-04-21 | CRAN         | (R 3.4.2) |
| rprojroot            | 1.2       | 2017-01-16 | CRAN         | (R 3.4.2) |
| Rsamtools            | * 1.28.0  | 2017-10-13 | Bioconductor |           |
| rvest                | 0.3.2     | 2016-06-17 | CRAN         | (R 3.4.2) |
| S4Vectors            | * 0.14.7  | 2017-10-13 | Bioconductor |           |
| scales               | 0.5.0     | 2017-08-24 | CRAN         | (R 3.4.2) |
| ShortRead            | * 1.34.2  | 2017-10-13 | Bioconductor |           |
| splines              | 3.4.2     | 2017-10-06 | local        |           |
| stats                | * 3.4.2   | 2017-10-06 | local        |           |
| stats4               | * 3.4.2   | 2017-10-06 | local        |           |
| stringi              | 1.1.5     | 2017-04-07 | CRAN         | (R 3.4.2) |
| stringr              | 1.2.0     | 2017-02-18 | CRAN         | (R 3.4.2) |
| SummarizedExperiment | * 1.6.5   | 2017-10-13 | Bioconductor |           |
| survival             | * 2.41-3  | 2017-04-04 | CRAN         | (R 3.4.2) |
| tibble               | 1.3.4     | 2017-08-22 | CRAN         | (R 3.4.2) |
| tools                | 3.4.2     | 2017-10-06 | local        |           |
| utils                | * 3.4.2   | 2017-10-06 | local        |           |
| withr                | 2.0.0     | 2017-07-28 | CRAN         | (R 3.4.2) |
| xml2                 | 1.1.1     | 2017-01-24 | CRAN         | (R 3.4.2) |
| XVector              | * 0.16.0  | 2017-10-13 | Bioconductor |           |
| yaml                 | 2.1.14    | 2016-11-12 | CRAN         | (R 3.4.2) |
| zlibbioc             | 1.22.0    | 2017-10-13 | Bioconductor |           |

# Reverse mapping of CustomArray oligos to original proteins

*Tomas Bjorklund*

*Wed Nov 1 10:47:48 2017*

This workflow aligns the short oligos from the CustomArray order to the full reference sequences using Bowtie2. This enables the mapping to all genes sharing the same sequence.

```
suppressPackageStartupMessages(library(knitr))
```

## Load sequences

```
LUT.dna <- read.table("data/SortedFragments_all.txt", header = TRUE, skip = 0,  
  sep = "\t", stringsAsFactors = FALSE, fill = TRUE)  
LUT.dna <- data.table(LUT.dna)
```

## Remove constitutive backbone sequences

```
invisible(LUT.dna[, `:=`(Sequence, gsub("aacctccagagaggcaacg", "", Sequence))])  
invisible(LUT.dna[, `:=`(Sequence, gsub("cagacaagcagctaccgca", "", Sequence))])  
invisible(LUT.dna[, `:=`(Sequence, toupper(Sequence))])  
setkey(LUT.dna, "Sequence")  
LUT.dna <- unique(LUT.dna)  
LUT.dna$Names <- LUT.dna$Sequence  
LUT.dna$LUTnr <- make.names(seq(nrow(LUT.dna)), unique = TRUE)
```

## Split sequences based on linker and length

```
LUT.14aaG4S <- LUT.dna[substr(LUT.dna$Sequence, 1, 14) == "GAGGCGGAGGAAGT"]  
LUT.remaining <- LUT.dna[!(substr(LUT.dna$Sequence, 1, 14) == "GAGGCGGAGGAAGT")]  
LUT.14aaA5 <- LUT.remaining[substr(LUT.remaining$Sequence, 1, 14) == "CTGCTGCAGCAGCC"]  
LUT.remaining <- LUT.remaining[!(substr(LUT.remaining$Sequence, 1, 14) == "CTGCTGCAGCAGCC")]  
LUT.22aa <- LUT.remaining[nchar(LUT.remaining$Sequence) == 70L & substr(LUT.remaining$Sequence,  
  1, 2) == "CT"]  
LUT.remaining <- LUT.remaining[!(nchar(LUT.remaining$Sequence) == 70L & substr(LUT.remaining$Sequence,  
  1, 2) == "CT")]  
LUT.14aa <- LUT.remaining[nchar(LUT.remaining$Sequence) == 46L & substr(LUT.remaining$Sequence,  
  1, 2) == "CT"]  
rm(LUT.remaining)  
LUT.dna[LUT.dna$Sequence %in% LUT.14aaG4S$Sequence, "Structure"] <- "14aaG4S"  
LUT.dna[LUT.dna$Sequence %in% LUT.14aaA5$Sequence, "Structure"] <- "14aaA5"  
LUT.dna[LUT.dna$Sequence %in% LUT.22aa$Sequence, "Structure"] <- "22aa"  
LUT.dna[LUT.dna$Sequence %in% LUT.14aa$Sequence, "Structure"] <- "14aa"  
  
save(LUT.dna, file = "data/LUTdna.rda")
```

## Trim sequences

```
LUT.14aa$Sequence <- substr(LUT.14aa$Sequence, 3, 44)
LUT.14aaG4S$Sequence <- substr(LUT.14aaG4S$Sequence, 15, 56)
LUT.14aaA5$Sequence <- substr(LUT.14aaA5$Sequence, 15, 56)
LUT.22aa$Sequence <- substr(LUT.22aa$Sequence, 3, 68)
```

## Save fasta files for Bowtie alignments

```
LUT.14aa.fa <- tempfile(pattern = "LUT_14aa_", tmpdir = tempdir(), fileext = ".fa")
LUT.14aa.seq = ShortRead(DNAStringSet(LUT.14aa$Sequence), BStringSet(LUT.14aa$LUTnr))
writeFasta(LUT.14aa.seq, LUT.14aa.fa)

LUT.14aaG4S.fa <- tempfile(pattern = "LUT_14aaG4s_", tmpdir = tempdir(), fileext = ".fa")
LUT.14aaG4S.seq = ShortRead(DNAStringSet(LUT.14aaG4S$Sequence), BStringSet(LUT.14aaG4S$LUTnr))
writeFasta(LUT.14aaG4S.seq, LUT.14aaG4S.fa)

LUT.14aaA5.fa <- tempfile(pattern = "LUT_14aaA5_", tmpdir = tempdir(), fileext = ".fa")
LUT.14aaA5.seq = ShortRead(DNAStringSet(LUT.14aaA5$Sequence), BStringSet(LUT.14aaA5$LUTnr))
writeFasta(LUT.14aaA5.seq, LUT.14aaA5.fa)

LUT.22aa.fa <- tempfile(pattern = "LUT_14aaA5_", tmpdir = tempdir(), fileext = ".fa")
LUT.22aa.seq = ShortRead(DNAStringSet(LUT.22aa$Sequence), BStringSet(LUT.22aa$LUTnr))
writeFasta(LUT.22aa.seq, LUT.22aa.fa)
```

## Build Bowtie index

```
seqs.original <- readFasta("input/DNA-lib_RetrogradeTransport.fasta")

seqs.AA <- Biostrings::translate(sread(seqs.original), genetic.code = GENETIC_CODE,
  if.fuzzy.codon = "error")

source("functions/AAtoDNA.R")
seqs.optimized = ShortRead(DNAStringSet(sapply(seqs.AA, function(x) AAtoDNA(x,
  species = "hsa"))), BStringSet(gsub("[ ]", "_", ShortRead::id(seqs.original))))

bowtie.fasta <- tempfile(pattern = "bowtie_", tmpdir = tempdir(), fileext = ".fa")

writeFasta(seqs.optimized, bowtie.fasta)

bowtie.idx <- tempfile(pattern = "IDX_bowtie_", tmpdir = tempdir(), fileext = "")

sys.out <- system(paste("bowtie2-build", bowtie.fasta, bowtie.idx, ">&1", sep = " "),
  intern = TRUE, ignore.stdout = FALSE)
```

## Align fragments to reference

Align 14aa sequences

```
name.bowtie <- tempfile(pattern = "bowtie_", tmpdir = tempdir(), fileext = "")
```

```

sys.out <- system(paste("bowtie2 --non-deterministic --threads ", detectCores(),
  "--very-sensitive -f -a", " -x ", bowtie.idx, " -U ", LUT.14aa.fa, " -S ",
  name.bowtie, ".sam 2>&1", sep = ""), intern = TRUE, ignore.stdout = FALSE)

sys.out <- as.data.frame(sys.out)

colnames(sys.out) <- c("Bowtie 2 alignment to library")
invisible(sys.out[" "] <- " ")
lengthOut <- (nrow(sys.out))
knitr::kable(sys.out[1:lengthOut, ], format = "latex", booktabs = T) %>% kable_styling(latex_options = "str

```

| Bowtie 2 alignment to library            |
|------------------------------------------|
| 44705 reads; of these:                   |
| 44705 (100.00%) were unpaired; of these: |
| 0 (0.00%) aligned 0 times                |
| 27420 (61.34%) aligned exactly 1 time    |
| 17285 (38.66%) aligned >1 times          |
| 100.00% overall alignment rate           |

```

command.args <- paste("view -@ ", detectCores(), " -Sb ", name.bowtie, ".sam > ",
  name.bowtie, ".bam", sep = "")
system2("/usr/local/bin/samtools", args = command.args, stdout = TRUE, stderr = TRUE)

```

```
character(0)
```

```

command.args <- paste("sort -@ ", detectCores(), " ", name.bowtie, ".bam -o ",
  name.bowtie, "_sort.bam", sep = "")
system2("/usr/local/bin/samtools", args = command.args, stdout = TRUE, stderr = TRUE)

```

```
character(0)
```

```

frag14aa.ranges <- readGAlignments(paste(name.bowtie, "_sort.bam", sep = ""),
  use.names = TRUE)
length(names(frag14aa.ranges))

```

```
[1] 75152
```

```
length(unique(names(frag14aa.ranges)))
```

```
[1] 44705
```

```
length(unique(LUT.14aa$Sequence))
```

```
[1] 44705
```

Align 14aaG4S sequences

```
name.bowtie <- tempfile(pattern = "bowtie_", tmpdir = tempdir(), fileext = "")
```

```

sys.out <- system(paste("bowtie2 --non-deterministic --threads ", detectCores(),
  "--very-sensitive -f -a", " -x ", bowtie.idx, " -U ", LUT.14aaG4S.fa, " -S ",
  name.bowtie, ".sam 2>&1", sep = ""), intern = TRUE, ignore.stdout = FALSE)

```

```
sys.out <- as.data.frame(sys.out)
```

```

colnames(sys.out) <- c("Bowtie 2 alignment to library")
invisible(sys.out[" "] <- " ")
lengthOut <- (nrow(sys.out))
knitr::kable(sys.out[1:lengthOut, ], format = "latex", booktabs = T) %>% kable_styling(latex_options = "str

```



---

Bowtie 2 alignment to library

---

15792 reads; of these:  
15792 (100.00%) were unpaired; of these:  
0 (0.00%) aligned 0 times  
9150 (57.94%) aligned exactly 1 time  
6642 (42.06%) aligned >1 times  
100.00% overall alignment rate

---

```
command.args <- paste("view -@ ", detectCores(), " -Sb ", name.bowtie, ".sam > ",  
  name.bowtie, ".bam", sep = "")  
system2("/usr/local/bin/samtools", args = command.args, stdout = TRUE, stderr = TRUE)
```

character(0)

```
command.args <- paste("sort -@ ", detectCores(), " ", name.bowtie, ".bam -o ",  
  name.bowtie, "_sort.bam", sep = "")  
system2("/usr/local/bin/samtools", args = command.args, stdout = TRUE, stderr = TRUE)
```

character(0)

```
frag14aaG4S.ranges <- readGAlignments(paste(name.bowtie, "_sort.bam", sep = ""),  
  use.names = TRUE)  
length(names(frag14aaG4S.ranges))
```

[1] 27778

```
length(unique(names(frag14aaG4S.ranges)))
```

[1] 15792

```
length(unique(LUT.14aaG4S$Sequence))
```

[1] 15792

Align 14aaA5 sequences

```
name.bowtie <- tempfile(pattern = "bowtie_", tmpdir = tempdir(), fileext = "")
```

```
sys.out <- system(paste("bowtie2 --non-deterministic --threads ", detectCores(),  
  " --very-sensitive -f -a", " -x ", bowtie.idx, " -U ", LUT.14aaA5.fa, " -S ",  
  name.bowtie, ".sam 2>&1", sep = ""), intern = TRUE, ignore.stdout = FALSE)
```

```
sys.out <- as.data.frame(sys.out)
```

```
colnames(sys.out) <- c("Bowtie 2 alignment to library")
```

```
invisible(sys.out[" "] <- " ")
```

```
lengthOut <- (nrow(sys.out))
```

```
knitr::kable(sys.out[1:lengthOut, ], format = "latex", booktabs = T) %>% kable_styling(latex_options = "str
```

---

Bowtie 2 alignment to library

---

15792 reads; of these:  
15792 (100.00%) were unpaired; of these:  
0 (0.00%) aligned 0 times  
9150 (57.94%) aligned exactly 1 time  
6642 (42.06%) aligned >1 times  
100.00% overall alignment rate

---

```
command.args <- paste("view -@ ", detectCores(), " -Sb ", name.bowtie, ".sam > ",
  name.bowtie, ".bam", sep = "")
system2("/usr/local/bin/samtools", args = command.args, stdout = TRUE, stderr = TRUE)
```

```
character(0)
```

```
command.args <- paste("sort -@ ", detectCores(), " ", name.bowtie, ".bam -o ",
  name.bowtie, "_sort.bam", sep = "")
system2("/usr/local/bin/samtools", args = command.args, stdout = TRUE, stderr = TRUE)
```

```
character(0)
```

```
frag14aaA5.ranges <- readGAlignments(paste(name.bowtie, "_sort.bam", sep = ""),
  use.names = TRUE)
length(names(frag14aaA5.ranges))
```

```
[1] 27778
```

```
length(unique(names(frag14aaA5.ranges)))
```

```
[1] 15792
```

```
length(unique(LUT.14aaA5$Sequence))
```

```
[1] 15792
```

```
Align 22aa sequences
```

```
name.bowtie <- tempfile(pattern = "bowtie_", tmpdir = tempdir(), fileext = "")
```

```
sys.out <- system(paste("bowtie2 --non-deterministic --threads ", detectCores(),
  " --very-sensitive -f -a", " -x ", bowtie.idx, " -U ", LUT.22aa.fa, " -S ",
  name.bowtie, ".sam 2>&1", sep = ""), intern = TRUE, ignore.stdout = FALSE)
```

```
sys.out <- as.data.frame(sys.out)
```

```
colnames(sys.out) <- c("Bowtie 2 alignment to library")
```

```
invisible(sys.out[" "] <- " ")
```

```
lengthOut <- (nrow(sys.out))
```

```
knitr::kable(sys.out[1:lengthOut, ], format = "latex", booktabs = T) %>% kable_styling(latex_options = "str")
```

| Bowtie 2 alignment to library            |
|------------------------------------------|
| 16054 reads; of these:                   |
| 16054 (100.00%) were unpaired; of these: |
| 0 (0.00%) aligned 0 times                |
| 8730 (54.38%) aligned exactly 1 time     |
| 7324 (45.62%) aligned >1 times           |
| 100.00% overall alignment rate           |

```
command.args <- paste("view -@ ", detectCores(), " -Sb ", name.bowtie, ".sam > ",
  name.bowtie, ".bam", sep = "")
system2("/usr/local/bin/samtools", args = command.args, stdout = TRUE, stderr = TRUE)
```

```
character(0)
```

```
command.args <- paste("sort -@ ", detectCores(), " ", name.bowtie, ".bam -o ",
  name.bowtie, "_sort.bam", sep = "")
system2("/usr/local/bin/samtools", args = command.args, stdout = TRUE, stderr = TRUE)
```

```
character(0)
```

```
frag22aa.ranges <- readGAlignments(paste(name.bowtie, "_sort.bam", sep = ""),
  use.names = TRUE)
length(names(frag22aa.ranges))
```

```
[1] 29665
```

```
length(unique(names(frag22aa.ranges)))
```

```
[1] 16054
```

```
length(unique(LUT.22aa$Sequence))
```

```
[1] 16054
```

## Merge and annotate aligned sequences

```
mcols(frag14aa.ranges)$structure <- "14aa"
mcols(frag22aa.ranges)$structure <- "22aa"
mcols(frag14aaA5.ranges)$structure <- "14aaA5"
mcols(frag14aaG4S.ranges)$structure <- "14aaG4S"
allFragments.ranges <- append(frag14aa.ranges, frag22aa.ranges)
allFragments.ranges <- append(allFragments.ranges, frag14aaA5.ranges)
allFragments.ranges <- append(allFragments.ranges, frag14aaG4S.ranges)

mcols(allFragments.ranges)$LUTnr <- names(allFragments.ranges)
setkey(LUT.dna, LUTnr)
mcols(allFragments.ranges)$Sequence <- LUT.dna[mcols(allFragments.ranges)$LUTnr]$Sequence

save(allFragments.ranges, file = "data/alignedLibraries.rda")

devtools::session_info()
```

```
Session info -----
```

```
setting  value
version  R version 3.4.2 (2017-09-28)
system   x86_64, linux-gnu
ui        X11
language (EN)
collate  en_US.UTF-8
tz        UTC
date     2017-11-01
```

```
Packages -----
```

| package      | * version | date       | source         |
|--------------|-----------|------------|----------------|
| acepack      | 1.4.1     | 2016-10-29 | CRAN (R 3.4.2) |
| ade4         | 1.7-8     | 2017-08-09 | CRAN (R 3.4.2) |
| backports    | 1.1.1     | 2017-09-25 | CRAN (R 3.4.2) |
| base         | * 3.4.2   | 2017-10-06 | local          |
| base64enc    | 0.1-3     | 2015-07-28 | CRAN (R 3.4.2) |
| Biobase      | * 2.36.2  | 2017-10-13 | Bioconductor   |
| BiocGenerics | * 0.22.1  | 2017-10-13 | Bioconductor   |
| BiocParallel | * 1.10.1  | 2017-10-13 | Bioconductor   |
| Biostrings   | * 2.44.2  | 2017-10-13 | Bioconductor   |
| bitops       | 1.0-6     | 2013-08-17 | CRAN (R 3.4.2) |
| checkmate    | 1.8.4     | 2017-09-25 | CRAN (R 3.4.2) |

|                   |            |            |                |
|-------------------|------------|------------|----------------|
| cluster           | 2.0.6      | 2017-03-16 | CRAN (R 3.4.2) |
| colorspace        | 1.3-2      | 2016-12-14 | CRAN (R 3.4.2) |
| compiler          | 3.4.2      | 2017-10-06 | local          |
| data.table        | * 1.10.4-2 | 2017-10-12 | CRAN (R 3.4.2) |
| datasets          | * 3.4.2    | 2017-10-06 | local          |
| DelayedArray      | * 0.2.7    | 2017-10-13 | Bioconductor   |
| devtools          | * 1.13.3   | 2017-08-02 | CRAN (R 3.4.2) |
| digest            | 0.6.12     | 2017-01-27 | CRAN (R 3.4.2) |
| evaluate          | 0.10.1     | 2017-06-24 | CRAN (R 3.4.2) |
| foreign           | 0.8-69     | 2017-06-21 | CRAN (R 3.4.2) |
| formatR           | 1.5        | 2017-04-25 | CRAN (R 3.4.2) |
| Formula           | * 1.2-2    | 2017-07-10 | CRAN (R 3.4.2) |
| GeneGA            | * 1.26.0   | 2017-10-13 | Bioconductor   |
| GenomeInfoDb      | * 1.12.3   | 2017-10-13 | Bioconductor   |
| GenomeInfoDbData  | 0.99.0     | 2017-10-13 | Bioconductor   |
| GenomicAlignments | * 1.12.2   | 2017-10-13 | Bioconductor   |
| GenomicRanges     | * 1.28.6   | 2017-10-13 | Bioconductor   |
| ggplot2           | * 2.2.1    | 2016-12-30 | CRAN (R 3.4.2) |
| graphics          | * 3.4.2    | 2017-10-06 | local          |
| grDevices         | * 3.4.2    | 2017-10-06 | local          |
| grid              | 3.4.2      | 2017-10-06 | local          |
| gridExtra         | 2.3        | 2017-09-09 | CRAN (R 3.4.2) |
| gtable            | 0.2.0      | 2016-02-26 | CRAN (R 3.4.2) |
| hash              | * 2.2.6    | 2013-02-21 | CRAN (R 3.4.2) |
| Hmisc             | * 4.0-3    | 2017-05-02 | CRAN (R 3.4.2) |
| hms               | 0.3        | 2016-11-22 | CRAN (R 3.4.2) |
| htmlTable         | 1.9        | 2017-01-26 | CRAN (R 3.4.2) |
| htmltools         | 0.3.6      | 2017-04-28 | CRAN (R 3.4.2) |
| htmlwidgets       | 0.9        | 2017-07-10 | CRAN (R 3.4.2) |
| httr              | 1.3.1      | 2017-08-20 | CRAN (R 3.4.2) |
| hwriter           | 1.3.2      | 2014-09-10 | CRAN (R 3.4.2) |
| IRanges           | * 2.10.5   | 2017-10-13 | Bioconductor   |
| kableExtra        | * 0.5.2    | 2017-09-15 | CRAN (R 3.4.2) |
| knitr             | * 1.17     | 2017-08-10 | CRAN (R 3.4.2) |
| lattice           | * 0.20-35  | 2017-03-25 | CRAN (R 3.4.2) |
| latticeExtra      | 0.6-28     | 2016-02-09 | CRAN (R 3.4.2) |
| lazyeval          | 0.2.0      | 2016-06-12 | CRAN (R 3.4.2) |
| magrittr          | 1.5        | 2014-11-22 | CRAN (R 3.4.2) |
| Matrix            | 1.2-11     | 2017-08-16 | CRAN (R 3.4.2) |
| matrixStats       | * 0.52.2   | 2017-04-14 | CRAN (R 3.4.2) |
| memoise           | 1.1.0      | 2017-04-21 | CRAN (R 3.4.2) |
| methods           | * 3.4.2    | 2017-10-06 | local          |
| munsell           | 0.4.3      | 2016-02-13 | CRAN (R 3.4.2) |
| nnet              | 7.3-12     | 2016-02-02 | CRAN (R 3.4.2) |
| parallel          | * 3.4.2    | 2017-10-06 | local          |
| plyr              | 1.8.4      | 2016-06-08 | CRAN (R 3.4.2) |
| R6                | 2.2.2      | 2017-06-17 | CRAN (R 3.4.2) |
| RColorBrewer      | 1.1-2      | 2014-12-07 | CRAN (R 3.4.2) |
| Rcpp              | 0.12.13    | 2017-09-28 | CRAN (R 3.4.2) |
| RCurl             | 1.95-4.8   | 2016-03-01 | CRAN (R 3.4.2) |
| readr             | 1.1.1      | 2017-05-16 | CRAN (R 3.4.2) |
| rlang             | 0.1.2      | 2017-08-09 | CRAN (R 3.4.2) |
| rmarkdown         | 1.6        | 2017-06-15 | CRAN (R 3.4.2) |
| rpart             | 4.1-11     | 2017-04-21 | CRAN (R 3.4.2) |
| rprojroot         | 1.2        | 2017-01-16 | CRAN (R 3.4.2) |
| Rsamtools         | * 1.28.0   | 2017-10-13 | Bioconductor   |
| rvest             | 0.3.2      | 2016-06-17 | CRAN (R 3.4.2) |

|                      |          |            |                |
|----------------------|----------|------------|----------------|
| S4Vectors            | * 0.14.7 | 2017-10-13 | Bioconductor   |
| scales               | 0.5.0    | 2017-08-24 | CRAN (R 3.4.2) |
| seqinr               | * 3.4-5  | 2017-08-01 | CRAN (R 3.4.2) |
| ShortRead            | * 1.34.2 | 2017-10-13 | Bioconductor   |
| splines              | 3.4.2    | 2017-10-06 | local          |
| stats                | * 3.4.2  | 2017-10-06 | local          |
| stats4               | * 3.4.2  | 2017-10-06 | local          |
| stringi              | 1.1.5    | 2017-04-07 | CRAN (R 3.4.2) |
| stringr              | 1.2.0    | 2017-02-18 | CRAN (R 3.4.2) |
| SummarizedExperiment | * 1.6.5  | 2017-10-13 | Bioconductor   |
| survival             | * 2.41-3 | 2017-04-04 | CRAN (R 3.4.2) |
| tibble               | 1.3.4    | 2017-08-22 | CRAN (R 3.4.2) |
| tools                | 3.4.2    | 2017-10-06 | local          |
| utils                | * 3.4.2  | 2017-10-06 | local          |
| withr                | 2.0.0    | 2017-07-28 | CRAN (R 3.4.2) |
| xml2                 | 1.1.1    | 2017-01-24 | CRAN (R 3.4.2) |
| XVector              | * 0.16.0 | 2017-10-13 | Bioconductor   |
| yaml                 | 2.1.14   | 2016-11-12 | CRAN (R 3.4.2) |
| zlibbioc             | 1.22.0   | 2017-10-13 | Bioconductor   |

# Library fragment alignment

*Tomas Bjorklund*

*Wed Nov 1 10:48:31 2017*

This workflow identifies correct fragments from the Cre-recombined AAV plasmid library and aligns them to the CustomArray ordered nucleotide fragments using Blastn. Consistant mutations in each fragment/barcode combination are also registered as is the putity of each barcode.

```
suppressPackageStartupMessages(library(knitr))
```

## Load the trimmed reads

```
load("data/LUTdna.rda")

fragments.file <- "data/fragments_AAVlibrary_complete.fastq.gz"
barcodes.file <- "data/barcodes_AAVlibrary_complete.fastq.gz"

reads.trim <- readFastq(fragments.file)
reads.BC <- readFastq(barcodes.file)
```

## Make CustomArray reference index for Blast

```
LUT.fa <- tempfile(pattern = "LUT_", tmpdir = tempdir(), fileext = ".fa")
LUT.seq = ShortRead(DNAStringSet(LUT.dna$Sequence), BStringSet(1:length(LUT.dna$LUTnr)))
writeFasta(LUT.seq, LUT.fa)
```

## Save unique fragments as fasta file

```
unique.reads <- unique(sread(reads.trim))
```

## Select subset

```
# unique.reads <- unique.reads[sample(length(unique.reads), 50000)]

unique.reads <- ShortRead(DNAStringSet(unique.reads), BStringSet(1:length(unique.reads)))
fragments.unique.fa <- tempfile(pattern = "FragUnique_", tmpdir = tempdir(),
  fileext = ".fa")
writeFasta(unique.reads, fragments.unique.fa)
```

## Align against the library using blast

```
blast.db <- tempfile(pattern = "blastDB_", tmpdir = tempdir(), fileext = ".db")
blast.out <- tempfile(pattern = "blastOut_", tmpdir = tempdir(), fileext = ".txt")
```

```

sys.out <- system(paste("makeblastdb -in ", LUT.fa, " -out ", blast.db, " -dbtype nucl -title LUT -parse_seqs
  sep = ""), intern = TRUE, ignore.stdout = FALSE)

sys.out <- as.data.frame(sys.out)

colnames(sys.out) <- c("blastn database generation")
invisible(sys.out[" "] <- " ")
knitr::kable(sys.out[1:(nrow(sys.out))], format = "latex", booktabs = T) %>%
  kable_styling(latex_options = "striped")

```

---

blastn database generation

---

Building a new DB, current time: 11/01/2017 10:49:31  
 New DB name: /tmp/RtmpivyakH/blastDB\_66624bb2db9.db  
 New DB title: LUT

Sequence type: Nucleotide  
 Keep MBits: T

Maximum file size: 1000000000B

Adding sequences from FASTA; added 92343 sequences in 3.2858 seconds.

---

```

sys.out <- system(paste("export SHELL=/bin/sh; cat ", fragments.unique.fa, " | parallel --block ",
  floor(length(unique.reads)/detectCores()), " --recstart '>' --pipe 'blastn -max_target_seqs 25 -word_size
  -num_threads 1 -outfmt 10 -db ", blast.db, " -query - '>' ", blast.out,
  " 2>&1", sep = ""), intern = TRUE, ignore.stdout = FALSE) #

# table.blastn <- data.table(read.table(blast.out, header = FALSE, skip = 0,
# sep=';', stringsAsFactors = FALSE, fill=FALSE), keep.rownames=FALSE,
# key='V1')

system(paste("gzip -c ", blast.out, " > ./data/blastOutput.csv.gz", sep = " "))

table.blastn <- data.table(scan(file = "./data/blastOutput.csv.gz", what = "character",
  sep = ";"), keep.rownames = FALSE, key = "V1")

if (length(grep("Warning", table.blastn$V1)) != 0) {
  warnings.out <- unique(table.blastn[grep("Warning", table.blastn$V1), ])
  table.blastn <- table.blastn[-grep("Warning", table.blastn$V1), ]
  setnames(warnings.out, "V1", c("blastn Warnings"))
  # knitr::kable(warnings.out[1:(nrow(warnings.out))], format = 'markdown')
}

table.blastn[, `:=`(c("Reads", "Sequence", "identity", "alignmentLength", "mismatches",
  "gapOpens", "q_start", "q_end", "s_start", "s_end", "evaluate", "bitScore"),
  tstrsplit(V1, ",", fixed = TRUE)), ]

table.blastn[, `:=`(Reads, as.character(sread(unique.reads[as.integer(Reads)])))]
table.blastn[, `:=`(Sequence, as.character(sread(LUT.seq[as.integer(Sequence)])))]
setkey(table.blastn, Sequence)
setkey(LUT.dna, Sequence)
table.blastn <- table.blastn[LUT.dna, nomatch = 0]
table.blastn[, `:=`(c("V1", "identity", "alignmentLength", "gapOpens", "q_start",

```

```

"q_end", "s_start", "s_end", "evaluate", "Sequence", "Names"), NULL])
gc() #garbage collection to reduce memory footprint. Can be removed for speed

      used (Mb) gc trigger (Mb) max used (Mb)
Ncells 9349510 499.4 216418051 11558.0 172911949 9234.5
Vcells 964075906 7355.4 4426097682 33768.5 5509384308 42033.3

table.blastn[, `:=`(bitScore, as.numeric(bitScore))]
table.blastn[, `:=`(mismatches, as.numeric(mismatches))]

setkeyv(table.blastn, c("Reads", "LUTnr"))
setorder(table.blastn, Reads, LUTnr, -bitScore) #This makes sure that a fragment is only aligned once to t
table.blastn <- unique(table.blastn, by = c("Reads", "LUTnr"))

gc() #garbage collection to reduce memory footprint. Can be removed for speed

      used (Mb) gc trigger (Mb) max used (Mb)
Ncells 9350413 499.4 173134440 9246.4 172911949 9234.5
Vcells 942290072 7189.2 3540878145 27014.8 5509384308 42033.3

table.blastn.topHit <- table.blastn[table.blastn[, .I[which.max(bitScore)],
  by = "Reads"]$V1] # Select only rows with the highest bitScore

full.table <- data.table(Reads = as.character(sread(reads.trim)), BC = as.character(sread(reads.BC)),
  key = "Reads")
all.reads <- nrow(full.table)

full.table <- full.table[table.blastn.topHit, nomatch = 0] # Merge reads with the top hit alignment

print(paste("Alignment percentage:", percent(nrow(full.table)/all.reads)))

[1] "Alignment percentage: 99.6%"

```

## Starcode based barcode reduction

```

out.name.BC.star <- tempfile(pattern = "BCsc_", tmpdir = tempdir(), fileext = ".txt")

command.args <- paste("-c ", barcodes.file, " | starcode -t ", detectCores() -
  1, " --print-clusters -d", 1, " -r5 -q -o ", out.name.BC.star, sep = "")

system2("gunzip", args = command.args, stdout = TRUE, stderr = TRUE)

character(0)

table.BC.sc <- data.table(read.table(out.name.BC.star, header = FALSE, row.names = 1,
  skip = 0, sep = "\t", stringsAsFactors = FALSE, fill = FALSE), keep.rownames = TRUE,
  key = "rn") #, nrow = 1000
table.BC.sc[, `:=`(V2, NULL)]

table.BC.sc <- table.BC.sc[, strsplit(as.character(V3), ",", fixed = TRUE),
  by = rn]

SC.droppedBC <- length(unique(sread(reads.BC))) - length(unique(table.BC.sc$V1) %in%
  unique(sread(reads.BC)))
print(paste("Dropped BCs in Starcode:", SC.droppedBC))

[1] "Dropped BCs in Starcode: 16603"

```



```
# rm(reads.BC, reads.trim)

setnames(table.BC.sc, c("V1", "rn"), c("BC", "scBC"))

DNA_pscAAVlib <- table.BC.sc
save(DNA_pscAAVlib, file = "data/scBC_DNA_pscAAVlib.rda")
```

## Replacing barcodes with Starcode reduced versions

```
setkey(full.table, BC)
setkey(table.BC.sc, BC)
full.table <- full.table[table.BC.sc, nomatch = 0]
# full.table <- merge(full.table, table.BC.sc, by='BC', all = FALSE, all.x =
# FALSE) rm(table.BC.sc)

setnames(full.table, c("BC", "scBC"), c("oldBC", "BC"))

setkey(full.table, BC)

RetainedBC <- length(unique(full.table$oldBC))
scBC <- length(unique(full.table$BC))
print(paste("Original unique barcodes:", RetainedBC))

[1] "Original unique barcodes: 3579215"
print(paste("SC reduced unique barcodes:", scBC))

[1] "SC reduced unique barcodes: 3188119"
table.frag <- data.table(as.data.frame((rev(sort(table(full.table$oldBC))))[1:10],
  row.names = "Var1"), keep.rownames = TRUE)
# In R versions below 3.3 remove, row.names = 'Var1' to make this compatible
setnames(table.frag, colnames(table.frag), c("Original BC", "Count"))
knitr::kable(table.frag, format = "latex", booktabs = T) %>% kable_styling(latex_options = "striped")
```

| Original BC          | Count |
|----------------------|-------|
| GTGTCCATCTGGACGCGTAG | 165   |
| CATGCATGGATGACTTATGT | 137   |
| GATGGTATATATGCGGATGG | 133   |
| GTTTAAAGCAATATGCACAC | 118   |
| AATCGCTGGATGGTTTATGG | 118   |
| GCGCAATCGTGGGAACGCAC | 108   |
| GTACATTGCTGTGAGCCTGC | 101   |
| GTGCCTTTATTGGCGGCATT | 100   |
| GCGGGCGGGTGGAATGGCGT | 99    |
| GCGTATGTGCAGGCTCATTG | 97    |

```
table.frag <- data.table(as.data.frame((rev(sort(table(full.table$BC))))[1:10],
  row.names = "Var1"), keep.rownames = TRUE)
# In R versions below 3.3 remove, row.names = 'Var1' to make this compatible
setnames(table.frag, colnames(table.frag), c("SC reduced BC", "Count"))
knitr::kable(table.frag, format = "latex", booktabs = T) %>% kable_styling(latex_options = "striped")

invisible(full.table[, `:=`(oldBC, NULL)])
```

| SC reduced BC        | Count |
|----------------------|-------|
| GTGTCCATCTGGACGCGTAG | 173   |
| GATGGTATATATGCGGATGG | 151   |
| CATGCATGGATGACTTATGT | 151   |
| AATCGCTGGATGGTTTATGG | 125   |
| GTTTAAAGCAATATGCACAC | 122   |
| GCGCAATCGTGGGAACGCAC | 119   |
| GCGGGCGGGTGAATGGCGT  | 117   |
| GTACATTGCTGTGAGCCTGC | 110   |
| GCGTATGTGCAGGCTCATTG | 105   |
| CTGCGCACGCTTGTACGCGG | 103   |

## Splitting reads into single-read and multi-read barcodes

```

full.table <- full.table[order(full.table$BC), ]
full.table[, `:=`(mismatches, as.numeric(mismatches))]

temp.table.single <- full.table[full.table[, .I[.N == 1], by = "BC"]$V1]
temp.table.multi <- full.table[full.table[, .I[.N > 1], by = "BC"]$V1]

temp.table.single[, `:=`(c("mCount", "tCount"), 1)]
temp.table.single$Mode <- "Amb"
setkeyv(temp.table.multi, c("BC", "LUTnr"))

temp.table.multi[, `:=`(c("bitScore", "mismatches", "tCount"), list(mean(bitScore),
  median(mismatches), .N)), by = key(temp.table.multi)]

temp.table.multi$Mode <- "Def"
temp.table.multi <- unique(temp.table.multi)

print("Utilized reads.....")

[1] "Utilized reads....."
print(nrow(full.table))

[1] 10642223
print("Whereof single reads.....")

[1] "Whereof single reads....."
print(nrow(temp.table.single))

[1] 1353656

```

## Splitting multi-read barcodes into clean and chimeric

```

setkeyv(temp.table.multi, "BC")

temp.table.multi.clean <- temp.table.multi[temp.table.multi[, .I[.N == 1], by = "BC"]$V1]
temp.table.multi <- temp.table.multi[temp.table.multi[, .I[.N > 1], by = "BC"]$V1]

```

```
temp.table.multi.clean[, `:=`(mCount, tCount)]
```

```
print("Clean multi-read barcodes.....")
```

```
[1] "Clean multi-read barcodes....."
```

```
print(nrow(temp.table.multi.clean))
```

```
[1] 280333
```

```
print("Chimeric multi-read barcodes.....")
```

```
[1] "Chimeric multi-read barcodes....."
```

```
print(length(unique(temp.table.multi$BC)))
```

```
[1] 1554130
```

## Calculate consensus alignment of chimeric barcodes

```
setkey(temp.table.multi, "BC")
```

```
temp.table.multi[, `:=`("mCount", tCount)]
```

```
temp.table.multi[, `:=`("tCount", sum(tCount)), by = "BC"]
```

```
setkey(temp.table.multi, "Reads")
```

```
temp.table.multi[, `:=`(c("LUTnr", "bitScore", "mismatches", "Structure"), NULL)]
```

```
setkey(table.blastn, "Reads")
```

```
temp.table.multi <- temp.table.multi[table.blastn, nomatch = 0, allow.cartesian = TRUE]
```

```
setkeyv(temp.table.multi, c("BC", "LUTnr"))
```

```
temp.table.multi[, `:=`(c("bitScore", "mismatches", "mCount"), list(max(bitScore),  
  median(mismatches), sum(mCount))), by = key(temp.table.multi)]
```

```
gc() #garbage collection to reduce memory foot print. Can be removed for speed
```

|        | used       | (Mb)    | gc trigger | (Mb)    | max used   | (Mb)    |
|--------|------------|---------|------------|---------|------------|---------|
| Ncells | 12952728   | 691.8   | 56732692   | 3029.9  | 173134440  | 9246.4  |
| Vcells | 2136119104 | 16297.3 | 3540878145 | 27014.8 | 5509384308 | 42033.3 |

```
temp.table.multi <- unique(temp.table.multi, by = c("BC", "LUTnr"))
```

```
setkeyv(temp.table.multi, "BC")
```

```
temp.table.multi <- temp.table.multi[temp.table.multi[, .I[mCount == max(mCount)],  
  by = key(temp.table.multi)]$V1]
```

```
# Select only rows with the highest mCount
```

```
temp.table.multi <- temp.table.multi[temp.table.multi[, .I[which.max(bitScore)],  
  by = key(temp.table.multi)]$V1]
```

```
# Select only rows with the highest bitScore
```

```
temp.table.multi[temp.table.multi$mCount == 1]$Mode <- "Amb"
```

```
print(paste("Number of barcodes with false mCount:", nrow(temp.table.multi[mCount >  
  tCount])))
```

```
[1] "Number of barcodes with false mCount: 0"
```

```
temp.table.multi.consensus <- rbind(temp.table.multi, temp.table.multi.clean)
```

```
print(paste("Total number of definitive Barcodes:", length(grep("Def", temp.table.multi.consensus$Mode))))
```

```

[1] "Total number of definitive Barcodes: 1575111"
print(paste("Total number of ambiguous Barcodes:", length(grep("Amb", temp.table.multi.consensus$Mode))))

[1] "Total number of ambiguous Barcodes: 259352"
print(paste("Total number of single-read Barcodes:", nrow(temp.table.single)))

[1] "Total number of single-read Barcodes: 1353656"
output.Table <- rbind(temp.table.multi.consensus, temp.table.single)
save(output.Table, file = "data/multipleContfragmentsComplete.rda")

print("Total analysis time:")

[1] "Total analysis time:"
print(Sys.time() - strt1)

Time difference of 4.251831 hours
devtools::session_info()

```

Session info -----

```

setting  value
version  R version 3.4.2 (2017-09-28)
system   x86_64, linux-gnu
ui       X11
language (EN)
collate  en_US.UTF-8
tz       UTC
date     2017-11-01

```

Packages -----

| package          | * version  | date       | source         |
|------------------|------------|------------|----------------|
| acepack          | 1.4.1      | 2016-10-29 | CRAN (R 3.4.2) |
| AnnotationDbi    | * 1.38.2   | 2017-10-13 | Bioconductor   |
| AnnotationFilter | 1.0.0      | 2017-10-13 | Bioconductor   |
| AnnotationHub    | 2.8.2      | 2017-10-13 | Bioconductor   |
| backports        | 1.1.1      | 2017-09-25 | CRAN (R 3.4.2) |
| base             | * 3.4.2    | 2017-10-06 | local          |
| base64enc        | 0.1-3      | 2015-07-28 | CRAN (R 3.4.2) |
| Biobase          | * 2.36.2   | 2017-10-13 | Bioconductor   |
| BiocGenerics     | * 0.22.1   | 2017-10-13 | Bioconductor   |
| BiocInstaller    | 1.26.1     | 2017-10-10 | Bioconductor   |
| BiocParallel     | * 1.10.1   | 2017-10-13 | Bioconductor   |
| biomaRt          | 2.32.1     | 2017-10-13 | Bioconductor   |
| Biostrings       | * 2.44.2   | 2017-10-13 | Bioconductor   |
| biovizBase       | * 1.24.0   | 2017-10-13 | Bioconductor   |
| bit              | 1.1-12     | 2014-04-09 | CRAN (R 3.4.2) |
| bit64            | 0.9-7      | 2017-05-08 | CRAN (R 3.4.2) |
| bitops           | 1.0-6      | 2013-08-17 | CRAN (R 3.4.2) |
| blob             | 1.1.0      | 2017-06-17 | CRAN (R 3.4.2) |
| BSgenome         | * 1.44.2   | 2017-10-13 | Bioconductor   |
| checkmate        | 1.8.4      | 2017-09-25 | CRAN (R 3.4.2) |
| cluster          | 2.0.6      | 2017-03-16 | CRAN (R 3.4.2) |
| codetools        | 0.2-15     | 2016-10-05 | CRAN (R 3.4.2) |
| colorspace       | 1.3-2      | 2016-12-14 | CRAN (R 3.4.2) |
| compiler         | 3.4.2      | 2017-10-06 | local          |
| curl             | 2.8.1      | 2017-07-21 | CRAN (R 3.4.2) |
| data.table       | * 1.10.4-2 | 2017-10-12 | CRAN (R 3.4.2) |

|                        |           |            |                |
|------------------------|-----------|------------|----------------|
| datasets               | * 3.4.2   | 2017-10-06 | local          |
| DBI                    | 0.7       | 2017-06-18 | CRAN (R 3.4.2) |
| DelayedArray           | * 0.2.7   | 2017-10-13 | Bioconductor   |
| devtools               | * 1.13.3  | 2017-08-02 | CRAN (R 3.4.2) |
| dichromat              | 2.0-0     | 2013-01-24 | CRAN (R 3.4.2) |
| digest                 | 0.6.12    | 2017-01-27 | CRAN (R 3.4.2) |
| doParallel             | * 1.0.11  | 2017-09-28 | CRAN (R 3.4.2) |
| ensemldb               | 2.0.4     | 2017-10-13 | Bioconductor   |
| evaluate               | 0.10.1    | 2017-06-24 | CRAN (R 3.4.2) |
| foreach                | * 1.4.3   | 2015-10-13 | CRAN (R 3.4.2) |
| foreign                | 0.8-69    | 2017-06-21 | CRAN (R 3.4.2) |
| formatR                | 1.5       | 2017-04-25 | CRAN (R 3.4.2) |
| Formula                | * 1.2-2   | 2017-07-10 | CRAN (R 3.4.2) |
| GenomeInfoDb           | * 1.12.3  | 2017-10-13 | Bioconductor   |
| GenomeInfoDbData       | 0.99.0    | 2017-10-13 | Bioconductor   |
| GenomicAlignments      | * 1.12.2  | 2017-10-13 | Bioconductor   |
| GenomicFeatures        | * 1.28.5  | 2017-10-13 | Bioconductor   |
| GenomicRanges          | * 1.28.6  | 2017-10-13 | Bioconductor   |
| ggplot2                | * 2.2.1   | 2016-12-30 | CRAN (R 3.4.2) |
| graphics               | * 3.4.2   | 2017-10-06 | local          |
| grDevices              | * 3.4.2   | 2017-10-06 | local          |
| grid                   | * 3.4.2   | 2017-10-06 | local          |
| gridExtra              | 2.3       | 2017-09-09 | CRAN (R 3.4.2) |
| gtable                 | 0.2.0     | 2016-02-26 | CRAN (R 3.4.2) |
| Gviz                   | * 1.20.0  | 2017-10-13 | Bioconductor   |
| Hmisc                  | * 4.0-3   | 2017-05-02 | CRAN (R 3.4.2) |
| hms                    | 0.3       | 2016-11-22 | CRAN (R 3.4.2) |
| htmlTable              | 1.9       | 2017-01-26 | CRAN (R 3.4.2) |
| htmltools              | 0.3.6     | 2017-04-28 | CRAN (R 3.4.2) |
| htmlwidgets            | 0.9       | 2017-07-10 | CRAN (R 3.4.2) |
| httpuv                 | 1.3.5     | 2017-07-04 | CRAN (R 3.4.2) |
| httr                   | 1.3.1     | 2017-08-20 | CRAN (R 3.4.2) |
| hwriter                | 1.3.2     | 2014-09-10 | CRAN (R 3.4.2) |
| interactiveDisplayBase | 1.14.0    | 2017-10-13 | Bioconductor   |
| IRanges                | * 2.10.5  | 2017-10-13 | Bioconductor   |
| iterators              | * 1.0.8   | 2015-10-13 | CRAN (R 3.4.2) |
| kableExtra             | * 0.5.2   | 2017-09-15 | CRAN (R 3.4.2) |
| knitr                  | * 1.17    | 2017-08-10 | CRAN (R 3.4.2) |
| lattice                | * 0.20-35 | 2017-03-25 | CRAN (R 3.4.2) |
| latticeExtra           | 0.6-28    | 2016-02-09 | CRAN (R 3.4.2) |
| lazyeval               | 0.2.0     | 2016-06-12 | CRAN (R 3.4.2) |
| magrittr               | 1.5       | 2014-11-22 | CRAN (R 3.4.2) |
| Matrix                 | 1.2-11    | 2017-08-16 | CRAN (R 3.4.2) |
| matrixStats            | * 0.52.2  | 2017-04-14 | CRAN (R 3.4.2) |
| memoise                | 1.1.0     | 2017-04-21 | CRAN (R 3.4.2) |
| methods                | * 3.4.2   | 2017-10-06 | local          |
| mime                   | 0.5       | 2016-07-07 | CRAN (R 3.4.2) |
| munsell                | 0.4.3     | 2016-02-13 | CRAN (R 3.4.2) |
| nnet                   | 7.3-12    | 2016-02-02 | CRAN (R 3.4.2) |
| parallel               | * 3.4.2   | 2017-10-06 | local          |
| plyr                   | * 1.8.4   | 2016-06-08 | CRAN (R 3.4.2) |
| ProtGenerics           | 1.8.0     | 2017-10-13 | Bioconductor   |
| R6                     | 2.2.2     | 2017-06-17 | CRAN (R 3.4.2) |
| RColorBrewer           | 1.1-2     | 2014-12-07 | CRAN (R 3.4.2) |
| Rcpp                   | 0.12.13   | 2017-09-28 | CRAN (R 3.4.2) |
| RCurl                  | 1.95-4.8  | 2016-03-01 | CRAN (R 3.4.2) |
| readr                  | 1.1.1     | 2017-05-16 | CRAN (R 3.4.2) |

|                      |           |            |                |
|----------------------|-----------|------------|----------------|
| rlang                | 0.1.2     | 2017-08-09 | CRAN (R 3.4.2) |
| rmarkdown            | 1.6       | 2017-06-15 | CRAN (R 3.4.2) |
| rpart                | 4.1-11    | 2017-04-21 | CRAN (R 3.4.2) |
| rprojroot            | 1.2       | 2017-01-16 | CRAN (R 3.4.2) |
| Rsamtools            | * 1.28.0  | 2017-10-13 | Bioconductor   |
| RSQLite              | 2.0       | 2017-06-19 | CRAN (R 3.4.2) |
| rtracklayer          | * 1.36.6  | 2017-10-13 | Bioconductor   |
| rvest                | 0.3.2     | 2016-06-17 | CRAN (R 3.4.2) |
| S4Vectors            | * 0.14.7  | 2017-10-13 | Bioconductor   |
| scales               | * 0.5.0   | 2017-08-24 | CRAN (R 3.4.2) |
| shiny                | 1.0.5     | 2017-08-23 | CRAN (R 3.4.2) |
| ShortRead            | * 1.34.2  | 2017-10-13 | Bioconductor   |
| splines              | 3.4.2     | 2017-10-06 | local          |
| stats                | * 3.4.2   | 2017-10-06 | local          |
| stats4               | * 3.4.2   | 2017-10-06 | local          |
| stringdist           | * 0.9.4.6 | 2017-07-31 | CRAN (R 3.4.2) |
| stringi              | 1.1.5     | 2017-04-07 | CRAN (R 3.4.2) |
| stringr              | 1.2.0     | 2017-02-18 | CRAN (R 3.4.2) |
| SummarizedExperiment | * 1.6.5   | 2017-10-13 | Bioconductor   |
| survival             | * 2.41-3  | 2017-04-04 | CRAN (R 3.4.2) |
| tibble               | 1.3.4     | 2017-08-22 | CRAN (R 3.4.2) |
| tools                | 3.4.2     | 2017-10-06 | local          |
| utils                | * 3.4.2   | 2017-10-06 | local          |
| VariantAnnotation    | 1.22.3    | 2017-10-13 | Bioconductor   |
| withr                | 2.0.0     | 2017-07-28 | CRAN (R 3.4.2) |
| XML                  | 3.98-1.9  | 2017-06-19 | CRAN (R 3.4.2) |
| xml2                 | 1.1.1     | 2017-01-24 | CRAN (R 3.4.2) |
| xtable               | 1.8-2     | 2016-02-05 | CRAN (R 3.4.2) |
| XVector              | * 0.16.0  | 2017-10-13 | Bioconductor   |
| yaml                 | 2.1.14    | 2016-11-12 | CRAN (R 3.4.2) |
| zlibbioc             | 1.22.0    | 2017-10-13 | Bioconductor   |

# Barcoded extraction and reduction from RNA samples

*Tomas Bjorklund*

*Wed Nov 1 15:03:54 2017*

This workflow identifies correct amplicons from in vivo & in vitro samples and extracts the barcode. Barcodes are then reduced using the starcode algorithm.

```
suppressPackageStartupMessages(library(knitr))
```

## Analyze tissue RNA

```
strt <- Sys.time()
load("data/multipleContfragmentsComplete.rda")
load("data/alignedLibraries.rda")
load("data/LUTdna.rda")

load.list <- read.table("input/loadlist.txt", header = FALSE, skip = 0, sep = "\t",
  stringsAsFactors = FALSE, fill = TRUE)

dataDir <- "seqFiles"
colnames(load.list) <- c("Name", "BaseName", "GroupName")

log.table <- data.table(Name = "Name", Reads = NA, Purity = NA, BCs = NA, SCdroppedBC = NA,
  allBCs = NA, scBCs = NA)

analyzeTissue <- function(indexNr) {
  # indexNr <- 1

  name <- unlist(strsplit(load.list$BaseName[indexNr], "/"))
  name <- name[!is.na(name)]
  if (length(name) == 2) {
    in.files <- list.files(paste(gsub("[\\]", "", dataDir), name[1], sep = "/"),
      pattern = paste(name[2], "*", sep = ""), full.names = TRUE)
  } else {
    in.files <- list.files(gsub("[\\]", "", dataDir), pattern = paste(name[1],
      "*", sep = ""), full.names = TRUE)
  }
  in.files.P5 <- in.files[grepl("R1", in.files)]
  in.files.P7 <- in.files[grepl("R2", in.files)]

  in.name.P5 <- tempfile(pattern = "P5_", tmpdir = tempdir(), fileext = ".fastq.gz")
  in.name.P7 <- tempfile(pattern = "P7_", tmpdir = tempdir(), fileext = ".fastq.gz")
  system(paste("cat '", paste(as.character(in.files.P5), collapse = " ' '),
    "' > ", in.name.P5, " 2>&1", sep = ""), intern = TRUE, ignore.stdout = FALSE)

  system(paste("cat '", paste(as.character(in.files.P7), collapse = " ' '),
    "' > ", in.name.P7, " 2>&1", sep = ""), intern = TRUE, ignore.stdout = FALSE)

  log.table$Name <- load.list$Name[indexNr]
  name.out <- log.table$Name

  # Selection of real amplicons =====
```

```

out.name.P5 <- tempfile(pattern = "P5_", tmpdir = tmpdir(), fileext = ".fastq.gz")
out.name.P7 <- tempfile(pattern = "P7_", tmpdir = tmpdir(), fileext = ".fastq.gz")
command.args <- paste("overwrite=true k=10 rcomp=f skipr1=t qhdist=0 maskmiddle=t ",
  "hammingdistance=1 findbestmatch=t ordered=t threads=", detectCores(),
  " in=", in.name.P5, " in2=", in.name.P7, " outm=", out.name.P5, " outm2=",
  out.name.P7, " fliteral=", "CGCCACAACATCGAGGACGGCAGCGTG", sep = "")

sys.out <- system2(path.expand("~/bbmap/bbduk2.sh"), args = command.args,
  stdout = TRUE, stderr = TRUE)
log.table$Purity <- strsplit(sys.out[grep("Contaminants", sys.out)], split = "\t")[[1]][2]

in.name.P5 <- out.name.P5
in.name.P7 <- out.name.P7

log.table$Reads <- as.integer(system(paste("gunzip -c ", shQuote(gsub("([\\])",
  "", in.name.P5)), " | echo $((`wc -l`/4)) 2>&1", sep = ""), intern = TRUE,
  ignore.stdout = FALSE)) #Stores the read count utilized

# Extraction of barcodes =====

out.name.BC <- tempfile(pattern = "BC_", tmpdir = tmpdir(), fileext = ".fastq.gz")

sys.out <- system(paste("~/bbmap/bbduk2.sh overwrite=true k=12 mink=12 hammingdistance=2 ",
  "findbestmatch=t trd=t rcomp=f skipr2=t findbestmatch=f qhdist=0 ",
  "minavgquality=0 ordered=t maxns=0 minlength=18 maxlength=22 threads=",
  detectCores(), " in=", shQuote(in.name.P5), " out=", out.name.BC, " lliteral=",
  "GGCCTAGCGGCCGCTTACTT", " rliteral=", "ATAACTTCGTATA", " 2>&1", sep = ""),
  intern = TRUE, ignore.stdout = FALSE)

log.table$BCs <- strsplit(sys.out[grep("Result:", sys.out)], split = "\t")[[1]][2]

reads.BC <- readFastq(out.name.BC)
barcodeTable <- data.table(ID = as.character(ShortRead::id(reads.BC)), BC = as.character(sread(reads.BC)),
  key = "BC")

# Starcode based barcode reduction =====

out.name.BC.star <- tempfile(pattern = "BCsc_", tmpdir = tmpdir(), fileext = ".txt")

system(paste("gunzip -c ", out.name.BC, " | starcode -t ", detectCores() -
  1, " --print-clusters -d", 1, " -r5 -q -o ", out.name.BC.star, " 2>&1",
  sep = ""), intern = TRUE, ignore.stdout = FALSE)

table.BC.sc <- data.table(read.table(out.name.BC.star, header = FALSE, row.names = 1,
  skip = 0, sep = "\t", stringsAsFactors = FALSE, fill = FALSE), keep.rownames = TRUE,
  key = "rn")
table.BC.sc[, `:=`(V2, NULL)]

table.BC.sc <- table.BC.sc[, strsplit(as.character(V3), ",", fixed = TRUE),
  by = rn]

log.table$SCdroppedBC <- length(unique(sread(reads.BC))) - length(unique(table.BC.sc$V1) %in%
  unique(sread(reads.BC)))

setnames(table.BC.sc, c("V1", "rn"), c("BC", "scBC"))

```



```

# Replacing barcodes with Starcode reduced versions
# =====

setkey(table.BC.sc, BC)

barcodeTable <- barcodeTable[table.BC.sc, nomatch = 0]

setnames(barcodeTable, c("BC", "scBC"), c("oldBC", "BC"))

setkey(barcodeTable, BC)

log.table$allBCs <- length(unique(barcodeTable$oldBC))
log.table$scBCs <- length(unique(barcodeTable$BC))

invisible(barcodeTable[, `:=`(oldBC, NULL)])
setkey(output.Table, "BC")

BCcount <- data.table(as.data.frame(rev(sort(table(barcodeTable$BC))), row.names = "Var1"),
  keep.rownames = TRUE)
# In R versions below 3.3 remove, row.names = 'Var1' to make this compatible
setnames(BCcount, colnames(BCcount), c("BC", "RNAcount"))
setkey(BCcount, "BC")
foundFrag <- output.Table[BCcount, nomatch = 0]
setkey(foundFrag, "LUTnr")
setkey(LUT.dna, "LUTnr")
foundFrag <- foundFrag[LUT.dna, nomatch = 0]
setnames(foundFrag, "Sequence", "fragment")
foundFrag[, `:=`(c("Names", "i.Structure"), NULL)]

matchRange <- function(idxFrag) {
  # idxFrag <- 23
  matchRanges <- which(mcols(allFragments.ranges)$Sequence == foundFrag$fragment[idxFrag])
  return(cbind(matchRanges, idxFrag))
}
match.ranges.list <- mclapply(1:nrow(foundFrag), matchRange, mc.preschedule = TRUE,
  mc.cores = detectCores())
match.ranges <- do.call(rbind, match.ranges.list)
foundFragments.ranges <- allFragments.ranges[match.ranges[, 1]]
if (ncol(match.ranges) >= 2) {
  foundFrag <- foundFrag[match.ranges[, "idxFrag"], ]
  foundFrag[, `:=`(c("Reads", "fragment", "Structure", "LUTnr"), NULL)]
  mcols(foundFragments.ranges) <- c(mcols(foundFragments.ranges), foundFrag)
  o = order(-mcols(foundFragments.ranges)$RNAcount)
  foundFragments.ranges <- foundFragments.ranges[o]
  saveRDS(foundFragments.ranges, file = paste("output/", "found.", name.out,
    ".rds", sep = ""), compress = TRUE)
}
return(log.table)
}

```

## Analysis summary

```
all.logs <- lapply(1:nrow(load.list), analyzeTissue)
all.logs <- rbindlist(all.logs, use.names = FALSE)
knitr::kable(all.logs, format = "latex", longtable = T, booktabs = T) %>% kable_styling(latex_options = c(
  "scale_down", "repeat_header")) %>% landscape()
```

Warning in styling\_latex\_scale\_down(out, table\_info): Longtable cannot be resized.

| Name                       | Reads    | Purity                  | BCs                     | SCdroppedBC | allBCs  | scBCs   |
|----------------------------|----------|-------------------------|-------------------------|-------------|---------|---------|
| DNA_pscAAVlib_Prep2        | 41210335 | 82420670 reads (99.65%) | 23986369 reads (58.20%) | 60046       | 4940426 | 3938187 |
| DNA_AAVlib_DNAse_3cpc      | 7964874  | 15929748 reads (99.66%) | 2985701 reads (37.49%)  | 154         | 341674  | 223158  |
| DNA_AAVlib_DNAse_30cpc     | 17557643 | 35115286 reads (99.69%) | 8827549 reads (50.28%)  | 2464        | 1157571 | 795330  |
| mRNA_30cpc_SN_RatNr7       | 1983137  | 3966274 reads (99.65%)  | 1614014 reads (81.39%)  | 41          | 24691   | 9962    |
| mRNA_30cpc_Ctx_RatNr7      | 1994467  | 3988934 reads (99.60%)  | 1771085 reads (88.80%)  | 13          | 16108   | 7547    |
| mRNA_30cpc_Th_RatNr7       | 2867972  | 5735944 reads (99.65%)  | 1382945 reads (48.22%)  | 12          | 30889   | 11632   |
| mRNA_30cpc_Str_RatNr7      | 1596468  | 3192936 reads (99.62%)  | 991144 reads (62.08%)   | 15          | 60701   | 21186   |
| mRNA_30cpc_SN_RatNr1       | 1611759  | 3223518 reads (99.67%)  | 1361550 reads (84.48%)  | 47          | 11471   | 6081    |
| mRNA_30cpc_Ctx_RatNr1      | 1541657  | 3083314 reads (99.67%)  | 1203038 reads (78.04%)  | 9           | 11542   | 7747    |
| mRNA_30cpc_Th_RatNr1       | 2359538  | 4719076 reads (99.67%)  | 1026288 reads (43.50%)  | 1           | 17976   | 8587    |
| mRNA_30cpc_Str_RatNr1      | 1505088  | 3010176 reads (99.60%)  | 619506 reads (41.16%)   | 6           | 37192   | 13397   |
| mRNA_30cpc_SN_RatNr8       | 2054931  | 4109862 reads (99.70%)  | 1215848 reads (59.17%)  | 80          | 22685   | 11414   |
| mRNA_30cpc_Ctx_RatNr8      | 2102816  | 4205632 reads (99.69%)  | 1081123 reads (51.41%)  | 18          | 13376   | 7115    |
| mRNA_30cpc_Th_RatNr8       | 2105768  | 4211536 reads (99.69%)  | 856547 reads (40.68%)   | 9           | 29605   | 12444   |
| mRNA_30cpc_Str_RatNr8      | 1623686  | 3247372 reads (99.64%)  | 612950 reads (37.75%)   | 9           | 45404   | 20175   |
| mRNA_3cpc_SN_RatNr15       | 1436268  | 2872536 reads (99.64%)  | 1435201 reads (99.93%)  | 17          | 4226    | 1538    |
| mRNA_3cpc_Ctx_RatNr15      | 1260242  | 2520484 reads (99.65%)  | 1062278 reads (84.29%)  | 12          | 6434    | 3211    |
| mRNA_3cpc_Th_RatNr15       | 1105966  | 2211932 reads (99.65%)  | 944716 reads (85.42%)   | 3           | 5642    | 2818    |
| mRNA_3cpc_Str_RatNr15      | 948187   | 1896374 reads (99.65%)  | 684628 reads (72.20%)   | 2           | 22301   | 6617    |
| mRNA_3cpc_SN_RatNr21       | 1115267  | 2230534 reads (99.75%)  | 1112638 reads (99.76%)  | 3           | 4489    | 2021    |
| mRNA_3cpc_Ctx_RatNr21      | 1201263  | 2402526 reads (99.73%)  | 788753 reads (65.66%)   | 2           | 3920    | 1926    |
| mRNA_3cpc_Th_RatNr21       | 1234915  | 2469830 reads (99.73%)  | 1063068 reads (86.08%)  | 0           | 7414    | 3780    |
| mRNA_3cpc_Str_RatNr21      | 1151549  | 2303098 reads (99.71%)  | 845867 reads (73.45%)   | 3           | 29847   | 8603    |
| mRNA_3cpc_Ctx_RatNr19      | 1743952  | 3487904 reads (99.61%)  | 1738647 reads (99.70%)  | 15          | 6568    | 2765    |
| mRNA_3cpc_Th_RatNr19       | 1738722  | 3477444 reads (99.68%)  | 1174178 reads (67.53%)  | 21          | 10753   | 6535    |
| mRNA_3cpc_Str_RatNr19      | 1645506  | 3291012 reads (99.67%)  | 1196277 reads (72.70%)  | 5           | 34666   | 12990   |
| mRNA_3cpc_Th_RatNr20       | 788088   | 1576176 reads (99.61%)  | 682035 reads (86.54%)   | 3           | 5098    | 2470    |
| mRNA_3cpc_Str_RatNr20      | 983263   | 1966526 reads (99.59%)  | 827836 reads (84.19%)   | 3           | 23426   | 8334    |
| mRNA_3cpc_HEK293Nr2        | 1588150  | 3176300 reads (99.63%)  | 1016131 reads (63.98%)  | 11          | 7051    | 3030    |
| mRNA_30cpc_HEK293Nr3       | 1920390  | 3840780 reads (99.65%)  | 864987 reads (45.04%)   | 13          | 20920   | 7730    |
| mRNA_3cpc_pNeuronNr6       | 1143395  | 2286790 reads (99.56%)  | 552817 reads (48.35%)   | 4           | 6313    | 2553    |
| mRNA_30cpc_pNeuronNr7      | 1652464  | 3304928 reads (99.66%)  | 942060 reads (57.01%)   | 13          | 24858   | 8032    |
| mRNA_30cpc_4wks_Ctx_RatNr2 | 1955085  | 3910170 reads (99.25%)  | 591146 reads (30.24%)   | 3           | 5607    | 2561    |
| mRNA_30cpc_4wks_SN_RatNr2  | 1921383  | 3842766 reads (99.39%)  | 1210727 reads (63.01%)  | 10          | 18161   | 8012    |
| mRNA_30cpc_4wks_Str_RatNr2 | 2101122  | 4202244 reads (100.00%) | 1563614 reads (74.42%)  | 24          | 84742   | 59375   |
| mRNA_30cpc_4wks_Th_RatNr2  | 2177483  | 4354966 reads (95.47%)  | 752026 reads (34.54%)   | 0           | 16068   | 5602    |
| mRNA_3cpc_4wks_Ctx_RatNr13 | 2070763  | 4141526 reads (99.61%)  | 183573 reads (8.86%)    | 1           | 1403    | 674     |
| mRNA_3cpc_4wks_SN_RatNr13  | 1809233  | 3618466 reads (99.47%)  | 105370 reads (5.82%)    | 2           | 1696    | 1249    |

*(continued)*

| Name                       | Reads   | Purity                 | BCs                    | SCdroppedBC | allBCs | scBCs |
|----------------------------|---------|------------------------|------------------------|-------------|--------|-------|
| mRNA_3cpc_4wks_Str_RatNr13 | 1693037 | 3386074 reads (99.32%) | 1096589 reads (64.77%) | 2           | 17281  | 6400  |
| mRNA_3cpc_4wks_Th_RatNr13  | 1954529 | 3909058 reads (99.61%) | 1079929 reads (55.25%) | 27          | 12266  | 5208  |

```
unlink(paste(tempdir(), "/*", sep = ""), recursive = FALSE, force = FALSE) #Cleanup of temp files
```

```
print("Total execution time:")
```

```
[1] "Total execution time:"
```

```
print(Sys.time() - strt)
```

```
Time difference of 1.177768 hours
```

```
devtools::session_info()
```

```
Session info -----
```

```
setting value
version R version 3.4.2 (2017-09-28)
system x86_64, linux-gnu
ui X11
language (EN)
collate en_US.UTF-8
tz UTC
date 2017-11-01
```

```
Packages -----
```

| package          | * version  | date       | source         |
|------------------|------------|------------|----------------|
| acepack          | 1.4.1      | 2016-10-29 | CRAN (R 3.4.2) |
| AnnotationDbi    | * 1.38.2   | 2017-10-13 | Bioconductor   |
| AnnotationFilter | 1.0.0      | 2017-10-13 | Bioconductor   |
| AnnotationHub    | 2.8.2      | 2017-10-13 | Bioconductor   |
| backports        | 1.1.1      | 2017-09-25 | CRAN (R 3.4.2) |
| base             | * 3.4.2    | 2017-10-06 | local          |
| base64enc        | 0.1-3      | 2015-07-28 | CRAN (R 3.4.2) |
| beanplot         | * 1.2      | 2014-09-19 | CRAN (R 3.4.2) |
| Biobase          | * 2.36.2   | 2017-10-13 | Bioconductor   |
| BiocGenerics     | * 0.22.1   | 2017-10-13 | Bioconductor   |
| BiocInstaller    | 1.26.1     | 2017-10-10 | Bioconductor   |
| BiocParallel     | * 1.10.1   | 2017-10-13 | Bioconductor   |
| biomaRt          | 2.32.1     | 2017-10-13 | Bioconductor   |
| Biostrings       | * 2.44.2   | 2017-10-13 | Bioconductor   |
| biovizBase       | * 1.24.0   | 2017-10-13 | Bioconductor   |
| bit              | 1.1-12     | 2014-04-09 | CRAN (R 3.4.2) |
| bit64            | 0.9-7      | 2017-05-08 | CRAN (R 3.4.2) |
| bitops           | 1.0-6      | 2013-08-17 | CRAN (R 3.4.2) |
| blob             | 1.1.0      | 2017-06-17 | CRAN (R 3.4.2) |
| BSgenome         | * 1.44.2   | 2017-10-13 | Bioconductor   |
| checkmate        | 1.8.4      | 2017-09-25 | CRAN (R 3.4.2) |
| cluster          | 2.0.6      | 2017-03-16 | CRAN (R 3.4.2) |
| codetools        | 0.2-15     | 2016-10-05 | CRAN (R 3.4.2) |
| colorspace       | 1.3-2      | 2016-12-14 | CRAN (R 3.4.2) |
| compiler         | 3.4.2      | 2017-10-06 | local          |
| curl             | 2.8.1      | 2017-07-21 | CRAN (R 3.4.2) |
| data.table       | * 1.10.4-2 | 2017-10-12 | CRAN (R 3.4.2) |
| datasets         | * 3.4.2    | 2017-10-06 | local          |
| DBI              | 0.7        | 2017-06-18 | CRAN (R 3.4.2) |
| DelayedArray     | * 0.2.7    | 2017-10-13 | Bioconductor   |
| devtools         | * 1.13.3   | 2017-08-02 | CRAN (R 3.4.2) |
| dichromat        | 2.0-0      | 2013-01-24 | CRAN (R 3.4.2) |
| digest           | 0.6.12     | 2017-01-27 | CRAN (R 3.4.2) |
| doParallel       | * 1.0.11   | 2017-09-28 | CRAN (R 3.4.2) |

|                        |          |            |                |
|------------------------|----------|------------|----------------|
| ensembldb              | 2.0.4    | 2017-10-13 | Bioconductor   |
| evaluate               | 0.10.1   | 2017-06-24 | CRAN (R 3.4.2) |
| foreach                | * 1.4.3  | 2015-10-13 | CRAN (R 3.4.2) |
| foreign                | 0.8-69   | 2017-06-21 | CRAN (R 3.4.2) |
| formatR                | * 1.5    | 2017-04-25 | CRAN (R 3.4.2) |
| Formula                | 1.2-2    | 2017-07-10 | CRAN (R 3.4.2) |
| GenomeInfoDb           | * 1.12.3 | 2017-10-13 | Bioconductor   |
| GenomeInfoDbData       | 0.99.0   | 2017-10-13 | Bioconductor   |
| GenomicAlignments      | * 1.12.2 | 2017-10-13 | Bioconductor   |
| GenomicFeatures        | * 1.28.5 | 2017-10-13 | Bioconductor   |
| GenomicRanges          | * 1.28.6 | 2017-10-13 | Bioconductor   |
| GGally                 | 1.3.2    | 2017-08-02 | CRAN (R 3.4.2) |
| ggbio                  | * 1.24.1 | 2017-10-13 | Bioconductor   |
| ggplot2                | * 2.2.1  | 2016-12-30 | CRAN (R 3.4.2) |
| graph                  | 1.54.0   | 2017-10-13 | Bioconductor   |
| graphics               | * 3.4.2  | 2017-10-06 | local          |
| grDevices              | * 3.4.2  | 2017-10-06 | local          |
| grid                   | * 3.4.2  | 2017-10-06 | local          |
| gridExtra              | 2.3      | 2017-09-09 | CRAN (R 3.4.2) |
| gtable                 | 0.2.0    | 2016-02-26 | CRAN (R 3.4.2) |
| Gviz                   | * 1.20.0 | 2017-10-13 | Bioconductor   |
| Hmisc                  | 4.0-3    | 2017-05-02 | CRAN (R 3.4.2) |
| hms                    | 0.3      | 2016-11-22 | CRAN (R 3.4.2) |
| htmlTable              | 1.9      | 2017-01-26 | CRAN (R 3.4.2) |
| htmltools              | 0.3.6    | 2017-04-28 | CRAN (R 3.4.2) |
| htmlwidgets            | 0.9      | 2017-07-10 | CRAN (R 3.4.2) |
| httpuv                 | 1.3.5    | 2017-07-04 | CRAN (R 3.4.2) |
| httr                   | 1.3.1    | 2017-08-20 | CRAN (R 3.4.2) |
| hwriter                | 1.3.2    | 2014-09-10 | CRAN (R 3.4.2) |
| interactiveDisplayBase | 1.14.0   | 2017-10-13 | Bioconductor   |
| IRanges                | * 2.10.5 | 2017-10-13 | Bioconductor   |
| iterators              | * 1.0.8  | 2015-10-13 | CRAN (R 3.4.2) |
| kableExtra             | * 0.5.2  | 2017-09-15 | CRAN (R 3.4.2) |
| knitr                  | * 1.17   | 2017-08-10 | CRAN (R 3.4.2) |
| lattice                | 0.20-35  | 2017-03-25 | CRAN (R 3.4.2) |
| latticeExtra           | 0.6-28   | 2016-02-09 | CRAN (R 3.4.2) |
| lazyeval               | 0.2.0    | 2016-06-12 | CRAN (R 3.4.2) |
| magrittr               | 1.5      | 2014-11-22 | CRAN (R 3.4.2) |
| Matrix                 | 1.2-11   | 2017-08-16 | CRAN (R 3.4.2) |
| matrixStats            | * 0.52.2 | 2017-04-14 | CRAN (R 3.4.2) |
| memoise                | 1.1.0    | 2017-04-21 | CRAN (R 3.4.2) |
| methods                | * 3.4.2  | 2017-10-06 | local          |
| mime                   | 0.5      | 2016-07-07 | CRAN (R 3.4.2) |
| munsell                | 0.4.3    | 2016-02-13 | CRAN (R 3.4.2) |
| nnet                   | 7.3-12   | 2016-02-02 | CRAN (R 3.4.2) |
| OrganismDbi            | 1.18.1   | 2017-10-13 | Bioconductor   |
| parallel               | * 3.4.2  | 2017-10-06 | local          |
| plyr                   | * 1.8.4  | 2016-06-08 | CRAN (R 3.4.2) |
| ProtGenerics           | 1.8.0    | 2017-10-13 | Bioconductor   |
| R6                     | 2.2.2    | 2017-06-17 | CRAN (R 3.4.2) |
| RBGL                   | 1.52.0   | 2017-10-13 | Bioconductor   |
| RColorBrewer           | 1.1-2    | 2014-12-07 | CRAN (R 3.4.2) |
| Rcpp                   | 0.12.13  | 2017-09-28 | CRAN (R 3.4.2) |
| RCurl                  | 1.95-4.8 | 2016-03-01 | CRAN (R 3.4.2) |
| readr                  | 1.1.1    | 2017-05-16 | CRAN (R 3.4.2) |
| reshape                | 0.8.7    | 2017-08-06 | CRAN (R 3.4.2) |
| reshape2               | 1.4.2    | 2016-10-22 | CRAN (R 3.4.2) |

|                      |          |            |                |
|----------------------|----------|------------|----------------|
| rlang                | 0.1.2    | 2017-08-09 | CRAN (R 3.4.2) |
| rmarkdown            | 1.6      | 2017-06-15 | CRAN (R 3.4.2) |
| rpart                | 4.1-11   | 2017-04-21 | CRAN (R 3.4.2) |
| rprojroot            | 1.2      | 2017-01-16 | CRAN (R 3.4.2) |
| Rsamtools            | * 1.28.0 | 2017-10-13 | Bioconductor   |
| RSQLite              | 2.0      | 2017-06-19 | CRAN (R 3.4.2) |
| rtracklayer          | * 1.36.6 | 2017-10-13 | Bioconductor   |
| rvest                | 0.3.2    | 2016-06-17 | CRAN (R 3.4.2) |
| S4Vectors            | * 0.14.7 | 2017-10-13 | Bioconductor   |
| scales               | * 0.5.0  | 2017-08-24 | CRAN (R 3.4.2) |
| shiny                | 1.0.5    | 2017-08-23 | CRAN (R 3.4.2) |
| ShortRead            | * 1.34.2 | 2017-10-13 | Bioconductor   |
| splines              | 3.4.2    | 2017-10-06 | local          |
| stats                | * 3.4.2  | 2017-10-06 | local          |
| stats4               | * 3.4.2  | 2017-10-06 | local          |
| stringi              | 1.1.5    | 2017-04-07 | CRAN (R 3.4.2) |
| stringr              | 1.2.0    | 2017-02-18 | CRAN (R 3.4.2) |
| SummarizedExperiment | * 1.6.5  | 2017-10-13 | Bioconductor   |
| survival             | 2.41-3   | 2017-04-04 | CRAN (R 3.4.2) |
| tibble               | 1.3.4    | 2017-08-22 | CRAN (R 3.4.2) |
| tools                | 3.4.2    | 2017-10-06 | local          |
| utils                | * 3.4.2  | 2017-10-06 | local          |
| VariantAnnotation    | 1.22.3   | 2017-10-13 | Bioconductor   |
| withr                | 2.0.0    | 2017-07-28 | CRAN (R 3.4.2) |
| XML                  | 3.98-1.9 | 2017-06-19 | CRAN (R 3.4.2) |
| xml2                 | 1.1.1    | 2017-01-24 | CRAN (R 3.4.2) |
| xtable               | 1.8-2    | 2016-02-05 | CRAN (R 3.4.2) |
| XVector              | * 0.16.0 | 2017-10-13 | Bioconductor   |
| yaml                 | 2.1.14   | 2016-11-12 | CRAN (R 3.4.2) |
| zlibbioc             | 1.22.0   | 2017-10-13 | Bioconductor   |

# Generate a complete library range object

*Tomas Bjorklund*

*Wed Nov 1 16:14:54 2017*

This short script generates a lookup scoring table of the AAV plasmid library so that it follows the same structure as the mRNA samples so that they can be compared for coverages.

```
suppressPackageStartupMessages(library(knitr))
```

## Generate library range object

```
load("data/alignedLibraries.rda")
load("data/LUTdna.rda")
load("data/multipleContfragmentsComplete.rda")
setkey(output.Table, LUTnr)
setkey(LUT.dna, LUTnr)
output.Table <- output.Table[LUT.dna, nomatch = 0]
output.Table[, `:=`(c("Names", "i.Structure"), NULL)]
setnames(output.Table, "Sequence", "fragment")
setkey(output.Table, fragment)

range.idx <- data.table(fragment = mcols(allFragments.ranges)$Sequence, idxFrag = 1:length(allFragments.ranges),
  key = "fragment")
output.Table <- output.Table[range.idx, nomatch = 0, allow.cartesian = TRUE]

foundFragments.ranges <- allFragments.ranges[output.Table$idxFrag]
output.Table[, `:=`(c("Reads", "fragment", "idxFrag", "Structure", "LUTnr"),
  NULL)]
output.Table[, `:=`(RNAcount, tCount)]

mcols(foundFragments.ranges) <- c(mcols(foundFragments.ranges), output.Table)

saveRDS(foundFragments.ranges, file = "output/completeLibraryRanges.rds")

devtools::session_info()
```

Session info -----

```
setting  value
version  R version 3.4.2 (2017-09-28)
system   x86_64, linux-gnu
ui       X11
language (EN)
collate  en_US.UTF-8
tz       UTC
date     2017-11-01
```

Packages -----

```
package      * version  date      source
backports    1.1.1    2017-09-25 CRAN (R 3.4.2)
base         * 3.4.2    2017-10-06 local
Biobase      * 2.36.2   2017-10-13 Bioconductor
BiocGenerics * 0.22.1   2017-10-13 Bioconductor
```



|                      |            |            |                |
|----------------------|------------|------------|----------------|
| BiocParallel         | * 1.10.1   | 2017-10-13 | Bioconductor   |
| Biostrings           | * 2.44.2   | 2017-10-13 | Bioconductor   |
| bitops               | 1.0-6      | 2013-08-17 | CRAN (R 3.4.2) |
| codetools            | 0.2-15     | 2016-10-05 | CRAN (R 3.4.2) |
| compiler             | 3.4.2      | 2017-10-06 | local          |
| data.table           | * 1.10.4-2 | 2017-10-12 | CRAN (R 3.4.2) |
| datasets             | * 3.4.2    | 2017-10-06 | local          |
| DelayedArray         | * 0.2.7    | 2017-10-13 | Bioconductor   |
| devtools             | * 1.13.3   | 2017-08-02 | CRAN (R 3.4.2) |
| digest               | 0.6.12     | 2017-01-27 | CRAN (R 3.4.2) |
| doParallel           | * 1.0.11   | 2017-09-28 | CRAN (R 3.4.2) |
| evaluate             | 0.10.1     | 2017-06-24 | CRAN (R 3.4.2) |
| foreach              | * 1.4.3    | 2015-10-13 | CRAN (R 3.4.2) |
| formatR              | 1.5        | 2017-04-25 | CRAN (R 3.4.2) |
| GenomeInfoDb         | * 1.12.3   | 2017-10-13 | Bioconductor   |
| GenomeInfoDbData     | 0.99.0     | 2017-10-13 | Bioconductor   |
| GenomicAlignments    | * 1.12.2   | 2017-10-13 | Bioconductor   |
| GenomicRanges        | * 1.28.6   | 2017-10-13 | Bioconductor   |
| graphics             | * 3.4.2    | 2017-10-06 | local          |
| grDevices            | * 3.4.2    | 2017-10-06 | local          |
| grid                 | 3.4.2      | 2017-10-06 | local          |
| hms                  | 0.3        | 2016-11-22 | CRAN (R 3.4.2) |
| htmltools            | 0.3.6      | 2017-04-28 | CRAN (R 3.4.2) |
| httr                 | 1.3.1      | 2017-08-20 | CRAN (R 3.4.2) |
| hwriter              | 1.3.2      | 2014-09-10 | CRAN (R 3.4.2) |
| IRanges              | * 2.10.5   | 2017-10-13 | Bioconductor   |
| iterators            | * 1.0.8    | 2015-10-13 | CRAN (R 3.4.2) |
| kableExtra           | * 0.5.2    | 2017-09-15 | CRAN (R 3.4.2) |
| knitr                | * 1.17     | 2017-08-10 | CRAN (R 3.4.2) |
| lattice              | 0.20-35    | 2017-03-25 | CRAN (R 3.4.2) |
| latticeExtra         | 0.6-28     | 2016-02-09 | CRAN (R 3.4.2) |
| magrittr             | 1.5        | 2014-11-22 | CRAN (R 3.4.2) |
| Matrix               | 1.2-11     | 2017-08-16 | CRAN (R 3.4.2) |
| matrixStats          | * 0.52.2   | 2017-04-14 | CRAN (R 3.4.2) |
| memoise              | 1.1.0      | 2017-04-21 | CRAN (R 3.4.2) |
| methods              | * 3.4.2    | 2017-10-06 | local          |
| parallel             | * 3.4.2    | 2017-10-06 | local          |
| R6                   | 2.2.2      | 2017-06-17 | CRAN (R 3.4.2) |
| RColorBrewer         | 1.1-2      | 2014-12-07 | CRAN (R 3.4.2) |
| Rcpp                 | 0.12.13    | 2017-09-28 | CRAN (R 3.4.2) |
| RCurl                | 1.95-4.8   | 2016-03-01 | CRAN (R 3.4.2) |
| readr                | 1.1.1      | 2017-05-16 | CRAN (R 3.4.2) |
| rlang                | 0.1.2      | 2017-08-09 | CRAN (R 3.4.2) |
| rmarkdown            | 1.6        | 2017-06-15 | CRAN (R 3.4.2) |
| rprojroot            | 1.2        | 2017-01-16 | CRAN (R 3.4.2) |
| Rsamtools            | * 1.28.0   | 2017-10-13 | Bioconductor   |
| rvest                | 0.3.2      | 2016-06-17 | CRAN (R 3.4.2) |
| S4Vectors            | * 0.14.7   | 2017-10-13 | Bioconductor   |
| ShortRead            | * 1.34.2   | 2017-10-13 | Bioconductor   |
| stats                | * 3.4.2    | 2017-10-06 | local          |
| stats4               | * 3.4.2    | 2017-10-06 | local          |
| stringi              | 1.1.5      | 2017-04-07 | CRAN (R 3.4.2) |
| stringr              | 1.2.0      | 2017-02-18 | CRAN (R 3.4.2) |
| SummarizedExperiment | * 1.6.5    | 2017-10-13 | Bioconductor   |
| tibble               | 1.3.4      | 2017-08-22 | CRAN (R 3.4.2) |
| tools                | 3.4.2      | 2017-10-06 | local          |
| utils                | * 3.4.2    | 2017-10-06 | local          |

|          |          |            |                |
|----------|----------|------------|----------------|
| withr    | 2.0.0    | 2017-07-28 | CRAN (R 3.4.2) |
| xml2     | 1.1.1    | 2017-01-24 | CRAN (R 3.4.2) |
| XVector  | * 0.16.0 | 2017-10-13 | Bioconductor   |
| yaml     | 2.1.14   | 2016-11-12 | CRAN (R 3.4.2) |
| zlibbioc | 1.22.0   | 2017-10-13 | Bioconductor   |

# Normalize Library counts

*Tomas Bjorklund*

*Wed Nov 1 16:16:12 2017*

This workflow normalizes read counts between samples to compensate for variable read depth.

```
suppressPackageStartupMessages(library(knitr))
```

## Generate load list and grouping names

```
strt <- Sys.time()
in.names.all <- list.files("output", pattern = "*.rds", full.names = TRUE)
load.list <- read.table("input/loadlist.txt", header = FALSE, skip = 0, sep = "\t",
  stringsAsFactors = FALSE, fill = TRUE)
colnames(load.list) <- c("Name", "BaseName", "GroupName")
load.list <- rbind(load.list, c("completeLibraryRanges", "", "DNA_pscAAVlib"))
load.list <- load.list[!grep("Untreat", load.list$Name), ]

select.Cases <- c(unlist(sapply(load.list$Name, function(x) grep(x, in.names.all),
  simplify = TRUE)))

(in.names.all <- in.names.all[select.Cases])
```

```
[1] "output/found.DNA_pscAAVlib_Prep2.rds"
[2] "output/found.DNA_AAVlib_DNase_3cpc.rds"
[3] "output/found.DNA_AAVlib_DNase_30cpc.rds"
[4] "output/found.mRNA_30cpc_SN_RatNr7.rds"
[5] "output/found.mRNA_30cpc_Ctx_RatNr7.rds"
[6] "output/found.mRNA_30cpc_Th_RatNr7.rds"
[7] "output/found.mRNA_30cpc_Str_RatNr7.rds"
[8] "output/found.mRNA_30cpc_SN_RatNr1.rds"
[9] "output/found.mRNA_30cpc_Ctx_RatNr1.rds"
[10] "output/found.mRNA_30cpc_Th_RatNr1.rds"
[11] "output/found.mRNA_30cpc_Str_RatNr1.rds"
[12] "output/found.mRNA_30cpc_SN_RatNr8.rds"
[13] "output/found.mRNA_30cpc_Ctx_RatNr8.rds"
[14] "output/found.mRNA_30cpc_Th_RatNr8.rds"
[15] "output/found.mRNA_30cpc_Str_RatNr8.rds"
[16] "output/found.mRNA_3cpc_SN_RatNr15.rds"
[17] "output/found.mRNA_3cpc_Ctx_RatNr15.rds"
[18] "output/found.mRNA_3cpc_Th_RatNr15.rds"
[19] "output/found.mRNA_3cpc_Str_RatNr15.rds"
[20] "output/found.mRNA_3cpc_SN_RatNr21.rds"
[21] "output/found.mRNA_3cpc_Ctx_RatNr21.rds"
[22] "output/found.mRNA_3cpc_Th_RatNr21.rds"
[23] "output/found.mRNA_3cpc_Str_RatNr21.rds"
[24] "output/found.mRNA_3cpc_Ctx_RatNr19.rds"
[25] "output/found.mRNA_3cpc_Th_RatNr19.rds"
[26] "output/found.mRNA_3cpc_Str_RatNr19.rds"
[27] "output/found.mRNA_3cpc_Th_RatNr20.rds"
[28] "output/found.mRNA_3cpc_Str_RatNr20.rds"
[29] "output/found.mRNA_3cpc_HEK293Nr2.rds"
[30] "output/found.mRNA_30cpc_HEK293Nr3.rds"
```

```

[31] "output/found.mRNA_3cpc_pNeuronNr6.rds"
[32] "output/found.mRNA_30cpc_pNeuronNr7.rds"
[33] "output/found.mRNA_30cpc_4wks_Ctx_RatNr2.rds"
[34] "output/found.mRNA_30cpc_4wks_SN_RatNr2.rds"
[35] "output/found.mRNA_30cpc_4wks_Str_RatNr2.rds"
[36] "output/found.mRNA_30cpc_4wks_Th_RatNr2.rds"
[37] "output/found.mRNA_3cpc_4wks_Ctx_RatNr13.rds"
[38] "output/found.mRNA_3cpc_4wks_SN_RatNr13.rds"
[39] "output/found.mRNA_3cpc_4wks_Str_RatNr13.rds"
[40] "output/found.mRNA_3cpc_4wks_Th_RatNr13.rds"
[41] "output/completeLibraryRanges.rds"

grouping <- data.frame(Sample = gsub("-", "_", gsub("found.|(output/)|(.rds)",
  "", in.names.all)), Group = load.list[match(names(select.Cases), load.list$Name),
  "GroupName"], stringsAsFactors = FALSE)

```

## Load the desired alignment files and annotating group

```

loadRDS <- function(in.name) {
  # in.name <- in.names.all[42]
  this.sample <- readRDS(in.name)
  this.name <- gsub("-", "_", gsub("found.|(output/)|(.rds)", "", in.name))
  this.group <- grouping[match(this.name, grouping$Sample), "Group"]
  mcols(this.sample) <- cbind(mcols(this.sample), data.frame(Sample = this.name,
    Group = this.group, stringsAsFactors = FALSE))

  return(this.sample)
}

all.samples <- lapply(in.names.all, loadRDS)

all.samples <- do.call(GAlignmentsList, unlist(all.samples))
all.samples <- cbind(unlist(all.samples))[[1]]

names(all.samples) <- make.names(names(all.samples), unique = TRUE)
length.Table <- data.table(seqnames = names(seqlengths(all.samples)), seqlength = seqlengths(all.samples),
  key = "seqnames")
all.samples <- data.table(as.data.frame(all.samples), key = "seqnames")
all.samples[, `:=`(c("strand", "qwidth", "cigar", "njunc", "end"), NULL)]
all.samples <- all.samples[length.Table] #A data.table merge to match seqlengths to their respective sequen
all.samples[, `:=`(c("Category", "Protein", "Origin", "Extra", "Number", "GeneName"),
  tstrsplit(seqnames, ",", fixed = TRUE))]
all.samples[, `:=`(c("seqnames", "Protein", "Origin", "Extra", "Number"), NULL)]
all.samples[, `:=`(GeneName, gsub("/|_", "-", GeneName))]

```

## Normalizing read counts to correct for variable read depth

```

setkey(all.samples, Group)
all.samples <- all.samples[RNAcount > 1, ] #Filters out single count reads
readCounts <- all.samples[, list(GroupCount = sum(RNAcount)), by = "Group"]
readCounts[, `:=`(GroupCount, GroupCount/max(GroupCount))]
setkey(readCounts, Group)
all.samples <- all.samples[readCounts] #Merge with normalizing factor

```

```

all.samples[, `:=`(RNAcount, RNAcount/GroupCount)]
setkey(all.samples, Mode)
all.samples <- all.samples["Def"]

setkey(all.samples, Group)
total.AAV.samples <- all.samples[Group != "DNA_pscAAVlib" & Group != "DNA_pscAAVlib_Pre2" &
  Group != "DNA_AAVlib_DNAse_3cpc" & Group != "DNA_AAVlib_DNAse_30cpc"]
# total.AAV.samples <-
# total.AAV.samples[!grepl('4wks', total.AAV.samples$Group)]
transported.AAV.samples.30cpc <- total.AAV.samples[grepl("mRNA_30cpc_SN|mRNA_30cpc_Th|mRNA_30cpc_Ctx",
  total.AAV.samples$Group)]
transported.AAV.samples.3cpc <- total.AAV.samples[grepl("mRNA_3cpc_SN|30cpc_Th|mRNA_3cpc_Ctx",
  total.AAV.samples$Group)]
total.AAV.samples[, `:=`(Group, "mRNA_All")]
transported.AAV.samples.30cpc[, `:=`(Group, "mRNA_30cpc_Trsp")]
transported.AAV.samples.3cpc[, `:=`(Group, "mRNA_3cpc_Trsp")]

all.samples <- rbind(all.samples, total.AAV.samples, transported.AAV.samples.30cpc,
  transported.AAV.samples.3cpc)

rm(total.AAV.samples, transported.AAV.samples.30cpc, transported.AAV.samples.3cpc)

setkeyv(all.samples, c("Group", "Category", "GeneName", "structure", "start",
  "width", "Sequence", "seqlength"))

all.samples <- all.samples[, j = list(bitScore = sum(bitScore * tCount)/sum(tCount),
  mismatches = median(mismatches), mCount = sum(mCount), tCount = sum(tCount),
  BC = paste(unique(BC), collapse = ","), Animals = paste(unique(Sample),
  collapse = ","), LUTnrs = paste(unique(LUTnr), collapse = ","), RNAcount = sum(RNAcount),
  NormCount = log2(sum(RNAcount) + 1) * .N), by = c("Group", "Category", "GeneName",
  "structure", "start", "width", "Sequence", "seqlength")]

all.samples[, `:=`(start, floor((start + 2)/3))]
all.samples[, `:=`(width, ceiling((width)/3))]
all.samples[, `:=`(seqlength, ceiling(seqlength/3))]
all.samples[, `:=`(AA, floor(start + (width/2)))]
all.samples[, `:=`(AProc, AA/seqlength * 100)]

```

## Remove overhangs on the sequence based on the Structure annotation

```

all.samples[structure == "14aa", `:=`("Sequence", substr(Sequence, 3, 44))]
all.samples[structure == "22aa", `:=`("Sequence", substr(Sequence, 3, 68))]
all.samples[structure == "14aaG4S", `:=`("Sequence", substr(Sequence, 15, 56))]
all.samples[structure == "14aaA5", `:=`("Sequence", substr(Sequence, 15, 56))]

# Change the default behavior to induce start codons and Methionine
GENETIC_CODE_ALT <- GENETIC_CODE
attr(GENETIC_CODE_ALT, "alt_init_codons") <- c("TAA", "TAG")

all.samples[, `:=`(Peptide, mclapply(Sequence, function(x) as.character(Biostrings::translate(DNAString(x),
  genetic.code = GENETIC_CODE_ALT, if.fuzzy.codon = "solve")), mc.cores = detectCores()))]
all.samples[, `:=`(Peptide, as.character(Peptide)), ]
saveRDS(all.samples, file = "data/allSamplesDataTable.RDS")

print("Total execution time:")

```

```
[1] "Total execution time:"
```

```
print(Sys.time() - strt)
```

Time difference of 1.321298 hours

```
devtools::session_info()
```

Session info -----

```
setting  value
version  R version 3.4.2 (2017-09-28)
system   x86_64, linux-gnu
ui       X11
language (EN)
collate  en_US.UTF-8
tz       UTC
date     2017-11-01
```

Packages -----

| package           | * version  | date       | source         |
|-------------------|------------|------------|----------------|
| acepack           | 1.4.1      | 2016-10-29 | CRAN (R 3.4.2) |
| ade4              | 1.7-8      | 2017-08-09 | CRAN (R 3.4.2) |
| backports         | 1.1.1      | 2017-09-25 | CRAN (R 3.4.2) |
| base              | * 3.4.2    | 2017-10-06 | local          |
| base64enc         | 0.1-3      | 2015-07-28 | CRAN (R 3.4.2) |
| Biobase           | * 2.36.2   | 2017-10-13 | Bioconductor   |
| BiocGenerics      | * 0.22.1   | 2017-10-13 | Bioconductor   |
| BiocParallel      | * 1.10.1   | 2017-10-13 | Bioconductor   |
| Biostrings        | * 2.44.2   | 2017-10-13 | Bioconductor   |
| bitops            | 1.0-6      | 2013-08-17 | CRAN (R 3.4.2) |
| checkmate         | 1.8.4      | 2017-09-25 | CRAN (R 3.4.2) |
| cluster           | 2.0.6      | 2017-03-16 | CRAN (R 3.4.2) |
| colorspace        | 1.3-2      | 2016-12-14 | CRAN (R 3.4.2) |
| compiler          | 3.4.2      | 2017-10-06 | local          |
| data.table        | * 1.10.4-2 | 2017-10-12 | CRAN (R 3.4.2) |
| datasets          | * 3.4.2    | 2017-10-06 | local          |
| DelayedArray      | * 0.2.7    | 2017-10-13 | Bioconductor   |
| devtools          | * 1.13.3   | 2017-08-02 | CRAN (R 3.4.2) |
| digest            | 0.6.12     | 2017-01-27 | CRAN (R 3.4.2) |
| evaluate          | 0.10.1     | 2017-06-24 | CRAN (R 3.4.2) |
| foreign           | 0.8-69     | 2017-06-21 | CRAN (R 3.4.2) |
| formatR           | 1.5        | 2017-04-25 | CRAN (R 3.4.2) |
| Formula           | * 1.2-2    | 2017-07-10 | CRAN (R 3.4.2) |
| GenomeInfoDb      | * 1.12.3   | 2017-10-13 | Bioconductor   |
| GenomeInfoDbData  | 0.99.0     | 2017-10-13 | Bioconductor   |
| GenomicAlignments | * 1.12.2   | 2017-10-13 | Bioconductor   |
| GenomicRanges     | * 1.28.6   | 2017-10-13 | Bioconductor   |
| ggplot2           | * 2.2.1    | 2016-12-30 | CRAN (R 3.4.2) |
| graphics          | * 3.4.2    | 2017-10-06 | local          |
| grDevices         | * 3.4.2    | 2017-10-06 | local          |
| grid              | 3.4.2      | 2017-10-06 | local          |
| gridExtra         | 2.3        | 2017-09-09 | CRAN (R 3.4.2) |
| gtable            | 0.2.0      | 2016-02-26 | CRAN (R 3.4.2) |
| Hmisc             | * 4.0-3    | 2017-05-02 | CRAN (R 3.4.2) |
| hms               | 0.3        | 2016-11-22 | CRAN (R 3.4.2) |
| htmlTable         | 1.9        | 2017-01-26 | CRAN (R 3.4.2) |
| htmltools         | 0.3.6      | 2017-04-28 | CRAN (R 3.4.2) |

|                      |           |            |                |
|----------------------|-----------|------------|----------------|
| htmlwidgets          | 0.9       | 2017-07-10 | CRAN (R 3.4.2) |
| httr                 | 1.3.1     | 2017-08-20 | CRAN (R 3.4.2) |
| hwriter              | 1.3.2     | 2014-09-10 | CRAN (R 3.4.2) |
| IRanges              | * 2.10.5  | 2017-10-13 | Bioconductor   |
| kableExtra           | * 0.5.2   | 2017-09-15 | CRAN (R 3.4.2) |
| knitr                | * 1.17    | 2017-08-10 | CRAN (R 3.4.2) |
| lattice              | * 0.20-35 | 2017-03-25 | CRAN (R 3.4.2) |
| latticeExtra         | 0.6-28    | 2016-02-09 | CRAN (R 3.4.2) |
| lazyeval             | 0.2.0     | 2016-06-12 | CRAN (R 3.4.2) |
| magrittr             | 1.5       | 2014-11-22 | CRAN (R 3.4.2) |
| Matrix               | 1.2-11    | 2017-08-16 | CRAN (R 3.4.2) |
| matrixStats          | * 0.52.2  | 2017-04-14 | CRAN (R 3.4.2) |
| memoise              | 1.1.0     | 2017-04-21 | CRAN (R 3.4.2) |
| methods              | * 3.4.2   | 2017-10-06 | local          |
| multicore            | * 0.2     | 2014-05-17 | url            |
| munsell              | 0.4.3     | 2016-02-13 | CRAN (R 3.4.2) |
| nnet                 | 7.3-12    | 2016-02-02 | CRAN (R 3.4.2) |
| parallel             | * 3.4.2   | 2017-10-06 | local          |
| plyr                 | * 1.8.4   | 2016-06-08 | CRAN (R 3.4.2) |
| R6                   | 2.2.2     | 2017-06-17 | CRAN (R 3.4.2) |
| RColorBrewer         | 1.1-2     | 2014-12-07 | CRAN (R 3.4.2) |
| Rcpp                 | 0.12.13   | 2017-09-28 | CRAN (R 3.4.2) |
| RCurl                | 1.95-4.8  | 2016-03-01 | CRAN (R 3.4.2) |
| readr                | 1.1.1     | 2017-05-16 | CRAN (R 3.4.2) |
| rlang                | 0.1.2     | 2017-08-09 | CRAN (R 3.4.2) |
| rmarkdown            | 1.6       | 2017-06-15 | CRAN (R 3.4.2) |
| rpart                | 4.1-11    | 2017-04-21 | CRAN (R 3.4.2) |
| rprojroot            | 1.2       | 2017-01-16 | CRAN (R 3.4.2) |
| Rsamtools            | * 1.28.0  | 2017-10-13 | Bioconductor   |
| rvest                | 0.3.2     | 2016-06-17 | CRAN (R 3.4.2) |
| S4Vectors            | * 0.14.7  | 2017-10-13 | Bioconductor   |
| scales               | * 0.5.0   | 2017-08-24 | CRAN (R 3.4.2) |
| seqinr               | * 3.4-5   | 2017-08-01 | CRAN (R 3.4.2) |
| ShortRead            | * 1.34.2  | 2017-10-13 | Bioconductor   |
| splines              | 3.4.2     | 2017-10-06 | local          |
| stats                | * 3.4.2   | 2017-10-06 | local          |
| stats4               | * 3.4.2   | 2017-10-06 | local          |
| stringi              | 1.1.5     | 2017-04-07 | CRAN (R 3.4.2) |
| stringr              | 1.2.0     | 2017-02-18 | CRAN (R 3.4.2) |
| SummarizedExperiment | * 1.6.5   | 2017-10-13 | Bioconductor   |
| survival             | * 2.41-3  | 2017-04-04 | CRAN (R 3.4.2) |
| tibble               | 1.3.4     | 2017-08-22 | CRAN (R 3.4.2) |
| tools                | 3.4.2     | 2017-10-06 | local          |
| utils                | * 3.4.2   | 2017-10-06 | local          |
| withr                | 2.0.0     | 2017-07-28 | CRAN (R 3.4.2) |
| xml2                 | 1.1.1     | 2017-01-24 | CRAN (R 3.4.2) |
| XVector              | * 0.16.0  | 2017-10-13 | Bioconductor   |
| yaml                 | 2.1.14    | 2016-11-12 | CRAN (R 3.4.2) |
| zlibbioc             | 1.22.0    | 2017-10-13 | Bioconductor   |

# Pairwise sample analysis output

Tomas Bjorklund

Tue Nov 7 10:55:17 2017

This script presents overview plots and top candidates.

```
suppressPackageStartupMessages(library(knitr))
```

## Generation of infective library

```
all.samples <- readRDS("data/allSamplesDataTable.RDS")

all.samples$Group[all.samples$Group == "mRNA_3cpc_HEK293T"] <- "mRNA_3cpc_HEK293T"
all.samples$Group[all.samples$Group == "mRNA_30cpc_HEK293T"] <- "mRNA_30cpc_HEK293T"
```

## Plotting function

```
plotPair <- function(topSample, bottomSample, size.bin = 1, winWidth = 1, NormalizePlot = TRUE,
  PlotBC = TRUE) {
  # Select samples =====

  # topSample <- 'mRNA_3cpc_Ctx' bottomSample <- 'mRNA_30cpc_Ctx' filterBC <-
  # FALSE filterAnimal <- FALSE AnimaladjustPlot <- FALSE NormalizePlot <-
  # TRUE size.bin <- 1 winWidth=1 PlotBC=TRUE

  fill.values <- eval(parse(text = paste("c(", topSample, "= rgb(38,64,135, maxColorValue = 255), ",
    bottomSample, "= rgb(157,190,217, maxColorValue = 255))", sep = "")))
  setkey(all.samples, Group)
  select.samples <- all.samples[J(names(fill.values))] #Select the two compared groups
  select.samples[, `:=`(RNAcount, log2(RNAcount + 1))]

  # if (PlotBC){
  # select.samples[,c('meanCount', 'SDcount', 'minCount'):=list(mean(RNAcount),
  # sd(RNAcount), min(RNAcount)),by='Group'] select.samples <-
  # select.samples[RNAcount>=minCount+(2*SDcount),] #-SDcount
  # select.samples[,c('meanCount', 'SDcount', 'minCount'):=NULL] }

  if (winWidth > 0) {
    setorder(select.samples, Group, GeneName, start, width)

    windowTable <- select.samples[, c("GeneName", "start", "width"), with = FALSE]
    windowTable <- unique(windowTable, by = c("GeneName", "start", "width"))
    windowTable <- windowTable[, (seq(width - winWidth + 1) + start - 1),
      by = c("GeneName", "start", "width")]
    setnames(windowTable, "V1", "winStart")
    windowTable[, `:=`(winEnd, winStart + winWidth - 1)]
    setkeyv(windowTable, c("GeneName", "start", "width"))
    setkeyv(select.samples, c("GeneName", "start", "width"))
```



```

select.samples.windowBin <- select.samples>windowTable, allow.cartesian = TRUE]
select.samples.windowBin[, `:=`(AAproc, winStart/seqlength * 100)]

setkey(select.samples.windowBin, Group)
select.samples.windowBin <- select.samples.windowBin[J(names(fill.values))] #Select the two compared
setkeyv(select.samples.windowBin, c("Group", "GeneName", "winStart",
  "winEnd"))
select.samples.windowBin <- select.samples.windowBin[, list(Overlaps = .N,
  seqlength = min(seqlength), AAproc = min(AAproc), BC = paste(t(BC),
  collapse = ","), Animals = paste(t(Animals), collapse = ","),
  LUTnrs = paste(t(LUTnrs), collapse = ","), RNAccount = sum(RNAccount)),
  by = c("Group", "GeneName", "winStart", "winEnd")]

plot.data.dt <- unique(select.samples.windowBin, by = c("Group", "GeneName",
  "winStart", "winEnd"))

} else {
  plot.data.dt <- data.table::copy(select.samples)
}

# ===== Binning of data =====
FullLength <- 100
position <- seq(0, FullLength, size.bin)
plot.data.dt[, `:=`(bin, findInterval(AAproc, position))]

plot.data.bin <- plot.data.dt[, list(.N, seqlength = min(seqlength), AAproc = position[findInterval(mean(
  position)], BCsum = length(table(strsplit(paste(t(BC), collapse = ","),
  ", "))), AnimalCount = length(table(strsplit(paste(t(Animals), collapse = ","),
  ", "))), LUTnrs = paste(unique(names(table(strsplit(paste(t(LUTnrs),
  collapse = ","), ", "))), collapse = ","), NormCount = sum(RNAccount)/seqlength *
  FullLength), by = c("Group", "GeneName", "bin")]
plot.data.bin <- unique(plot.data.bin, by = c("Group", "GeneName", "bin"))

plot.data.bin[, `:=`(BCanim, as.double(BCsum * AnimalCount))]

# ===== Filtration parameters =====

if (NormalizePlot) {
  plot.data.bin[plot.data.bin$Group == names(fill.values)[1]]$NormCount <- plot.data.bin[plot.data.bin$Group ==
  names(fill.values)[1]]$NormCount/max(plot.data.bin[plot.data.bin$Group ==
  names(fill.values)[1]]$NormCount)
  plot.data.bin[plot.data.bin$Group == names(fill.values)[2]]$NormCount <- plot.data.bin[plot.data.bin$Group ==
  names(fill.values)[2]]$NormCount/max(plot.data.bin[plot.data.bin$Group ==
  names(fill.values)[2]]$NormCount)
}

if (PlotBC && NormalizePlot) {
  plot.data.bin[plot.data.bin$Group == names(fill.values)[1]]$BCanim <- plot.data.bin[plot.data.bin$Group ==
  names(fill.values)[1]]$BCanim/max(plot.data.bin[plot.data.bin$Group ==
  names(fill.values)[1]]$BCanim)
  plot.data.bin[plot.data.bin$Group == names(fill.values)[2]]$BCanim <- plot.data.bin[plot.data.bin$Group ==
  names(fill.values)[2]]$BCanim/max(plot.data.bin[plot.data.bin$Group ==
  names(fill.values)[2]]$BCanim)
}

```

```

plot.data.bin[plot.data.bin$Group == names(fill.values)[2]]$NormCount <- plot.data.bin[plot.data.bin$Group ==
  names(fill.values)[2]]$NormCount * -1 #This line flips the values for the second group

plot.data.bin[plot.data.bin$Group == names(fill.values)[2]]$BCanim <- plot.data.bin[plot.data.bin$Group ==
  names(fill.values)[2]]$BCanim * -1 #This line flips the values for the second group

# ===== Output plot =====

if (PlotBC) {
  outVar <- "BCanim"
} else {
  outVar <- "NormCount"
}

plot.out <- eval(parse(text = paste("ggplot(plot.data.bin,aes(x=AAproc,y=",
  outVar, ", fill = Group, vjust=-20))", sep = "")))
plot.out <- plot.out + geom_bar(stat = "identity", position = "identity") +
  theme_bw() + scale_fill_manual(name = "Library", values = fill.values) +
  scale_colour_manual(name = "Library", values = fill.values) + scale_x_continuous(limit = c(0,
  100), breaks = c(seq(0, 100, 20)), expand = c(0, 0)) + facet_wrap(~GeneName,
  ncol = 5) + theme(plot.margin = unit(x = c(0, 0, 0, 0), units = "mm"),
  legend.position = "bottom", legend.spacing = unit(0, "cm"), legend.key.height = unit(0,
  "cm"), plot.background = element_rect(fill = "white"), axis.text = element_text(size = rel(0.45)),
  axis.ticks = element_line(size = rel(0.5)), axis.ticks.length = unit(0.05,
  "cm"), strip.text.x = element_text(size = rel(0.5), colour = "black",
  angle = 0, lineheight = 3, vjust = -20), strip.background = element_blank(),
  panel.spacing.y = unit(0, "cm"), panel.spacing.x = unit(0, "cm"))

# ===== Sort and select top samples =====

select.samples.binPos <- select.samples
setkeyv(select.samples.binPos, c("Group", "structure", "Sequence"))
setorder(select.samples.binPos, Group, structure, Sequence, GeneName)
select.samples.binPos <- unique(select.samples.binPos, by = c("Group", "structure",
  "Sequence"))
# Due to key, this removes replicates if identical sequence mapped to
# multiple genes

setkeyv(select.samples.binPos, c("Group", "Category", "GeneName", "AA"))
select.samples.binPos[, `:=`(c("BCcount", "NormCount", "AnimalCount", "LUTnrs",
  "mainStruct", "mismatches"), list(length(table(strsplit(paste(t(BC),
  collapse = ","), ","))), sum(NormCount), length(table(strsplit(paste(t(Animals),
  collapse = ","), ","))), paste(unique(names(table(strsplit(paste(t(LUTnrs),
  collapse = ","), ","))), collapse = ","), paste(unique(structure),
  collapse = ","), median(mismatches))), by = key(select.samples.binPos)]

select.samples.binPos <- unique(select.samples.binPos, by = c("Group", "NormCount",
  "LUTnrs"))
select.samples.binPos <- select.samples.binPos[, c("Group", "GeneName",
  "AA", "NormCount", "BCcount", "AnimalCount", "LUTnrs", "mainStruct",
  "mismatches"), with = FALSE]

if (PlotBC) {
  select.samples.binPos[, `:=`(BCanim, BCcount * AnimalCount)]
  setorder(select.samples.binPos, Group, -BCanim, -BCcount, -AnimalCount,
    -NormCount)
} else {

```

```

    setorder(select.samples.binPos, Group, -NormCount, -BCcount, -AnimalCount)
  }
  setkey(select.samples.binPos, Group)
  select.samples.top <- select.samples.binPos[, head(.SD, 25), by = Group]
  top.sample <- select.samples.top[J(names(fill.values)[1])]
  bottom.sample <- select.samples.top[J(names(fill.values)[2])]
  top.sample[, `:=`(c("Group"), NULL)]
  setnames(top.sample, "GeneName", names(fill.values)[1])
  bottom.sample[, `:=`(c("Group"), NULL)]
  setnames(bottom.sample, "GeneName", names(fill.values)[2])

  out.list <- list(plot = plot.out, plotBin = plot.data.bin, top = top.sample,
    bottom = bottom.sample)

  return(out.list)
}

```

## Analyze samples

```
# ===== Sample plotting =====
```

Binning analysis version 1

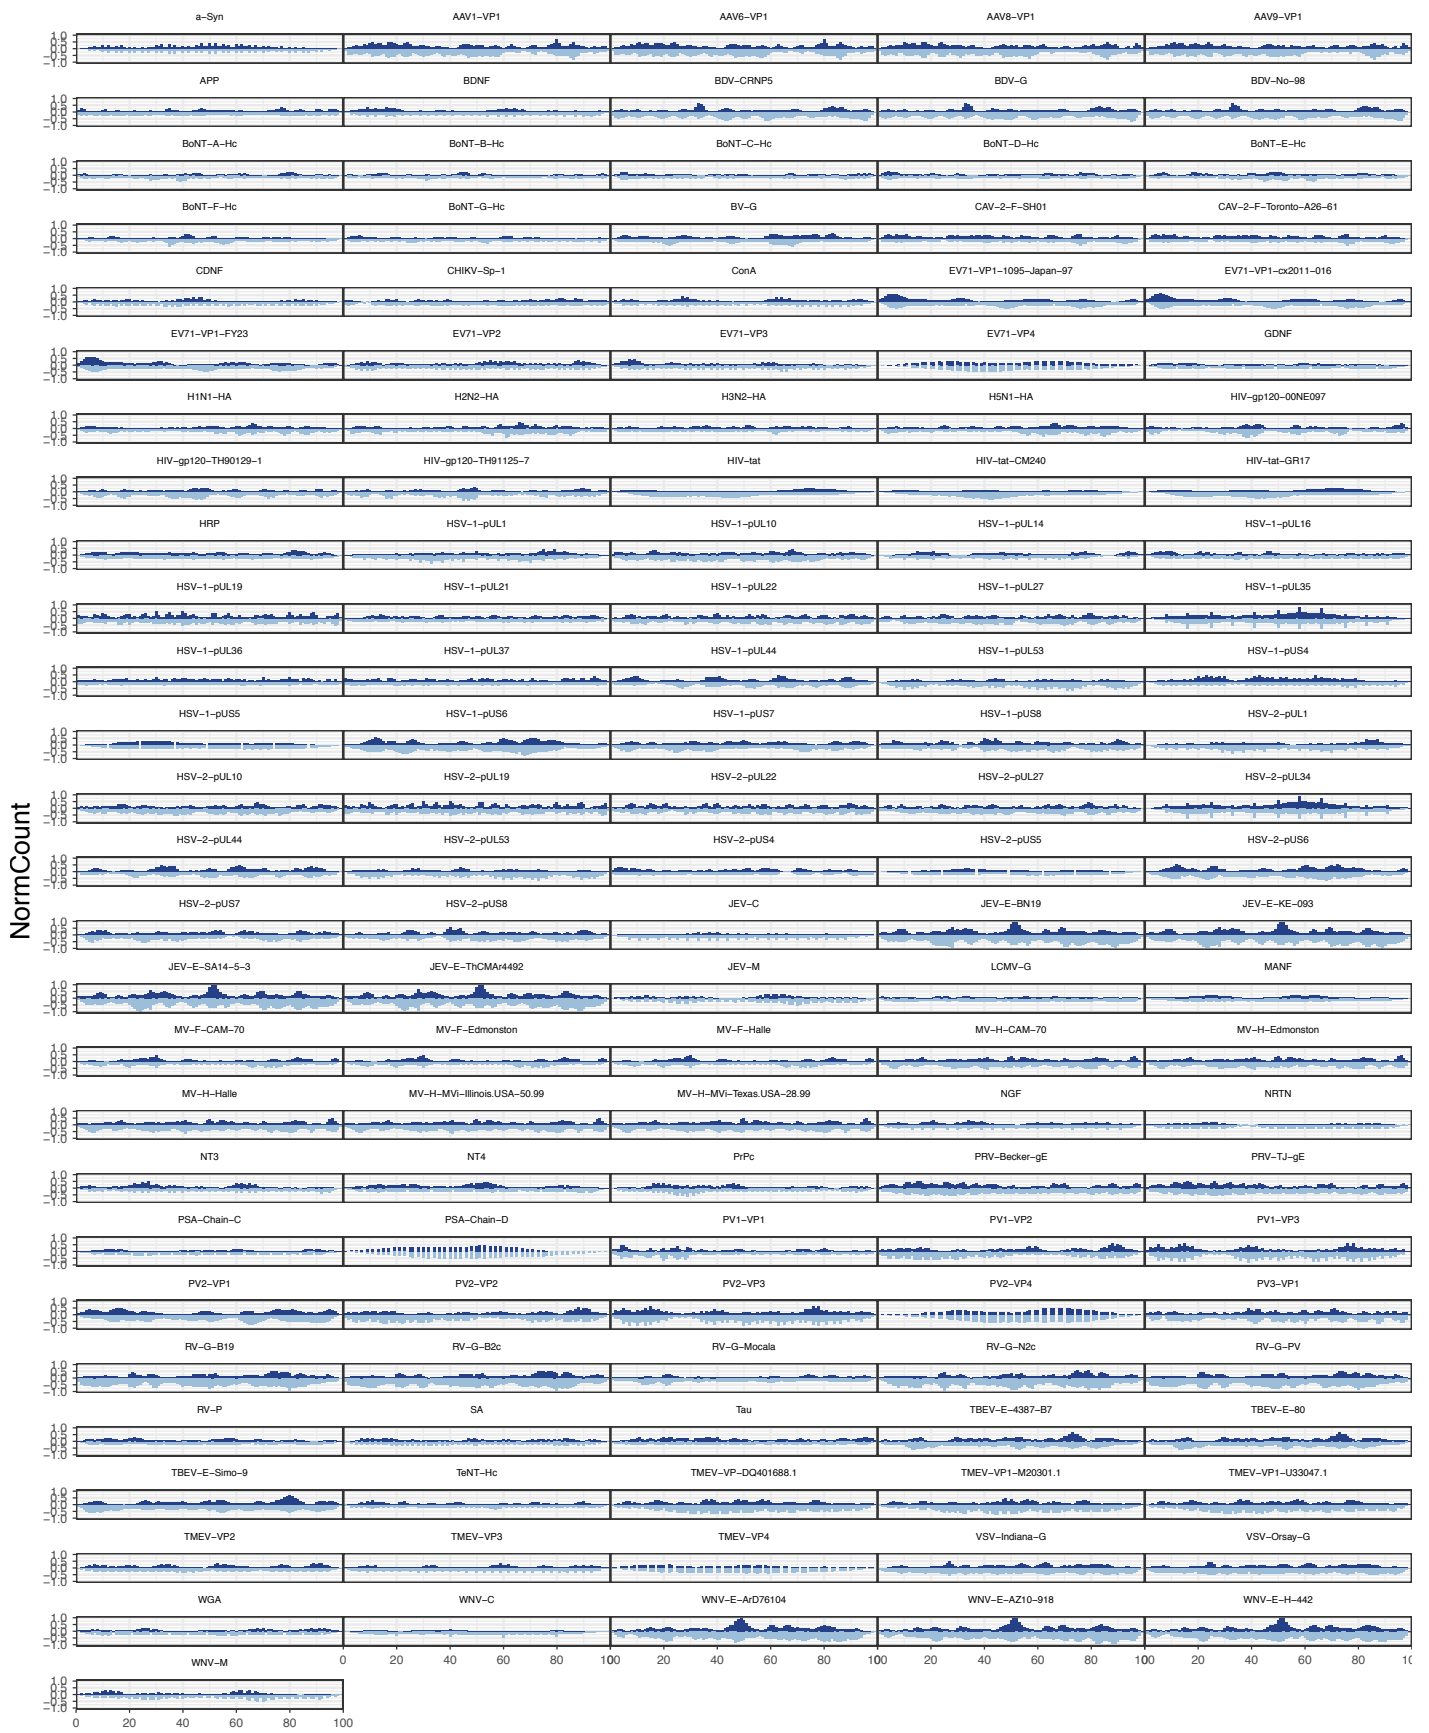

Aaproc

Library ■ DNA\_pscAAVlib ■ mRNA\_All

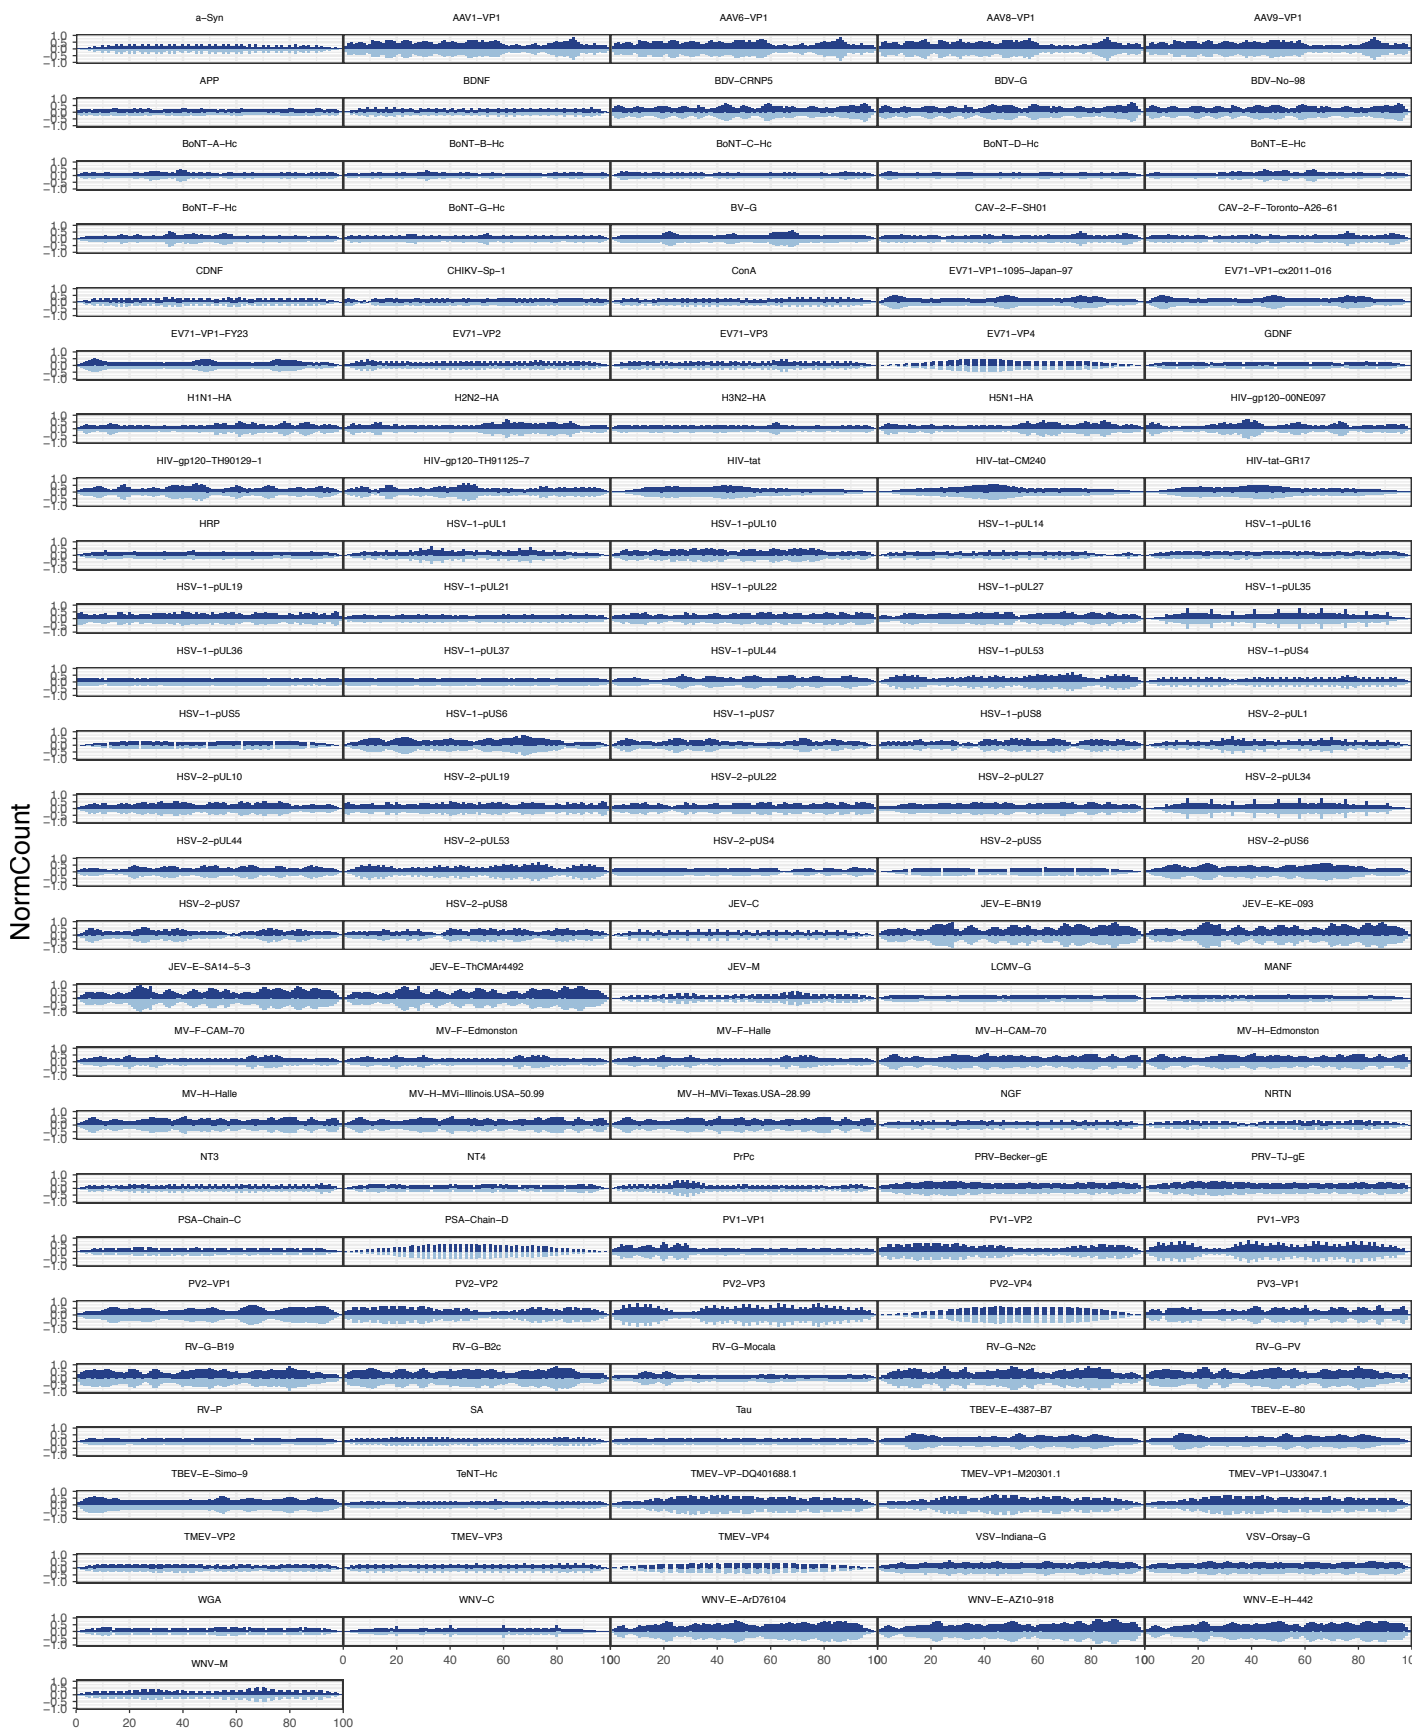

Aaproc

Library DNA\_pscAAVlib DNA\_pscAAVlib\_Prep2

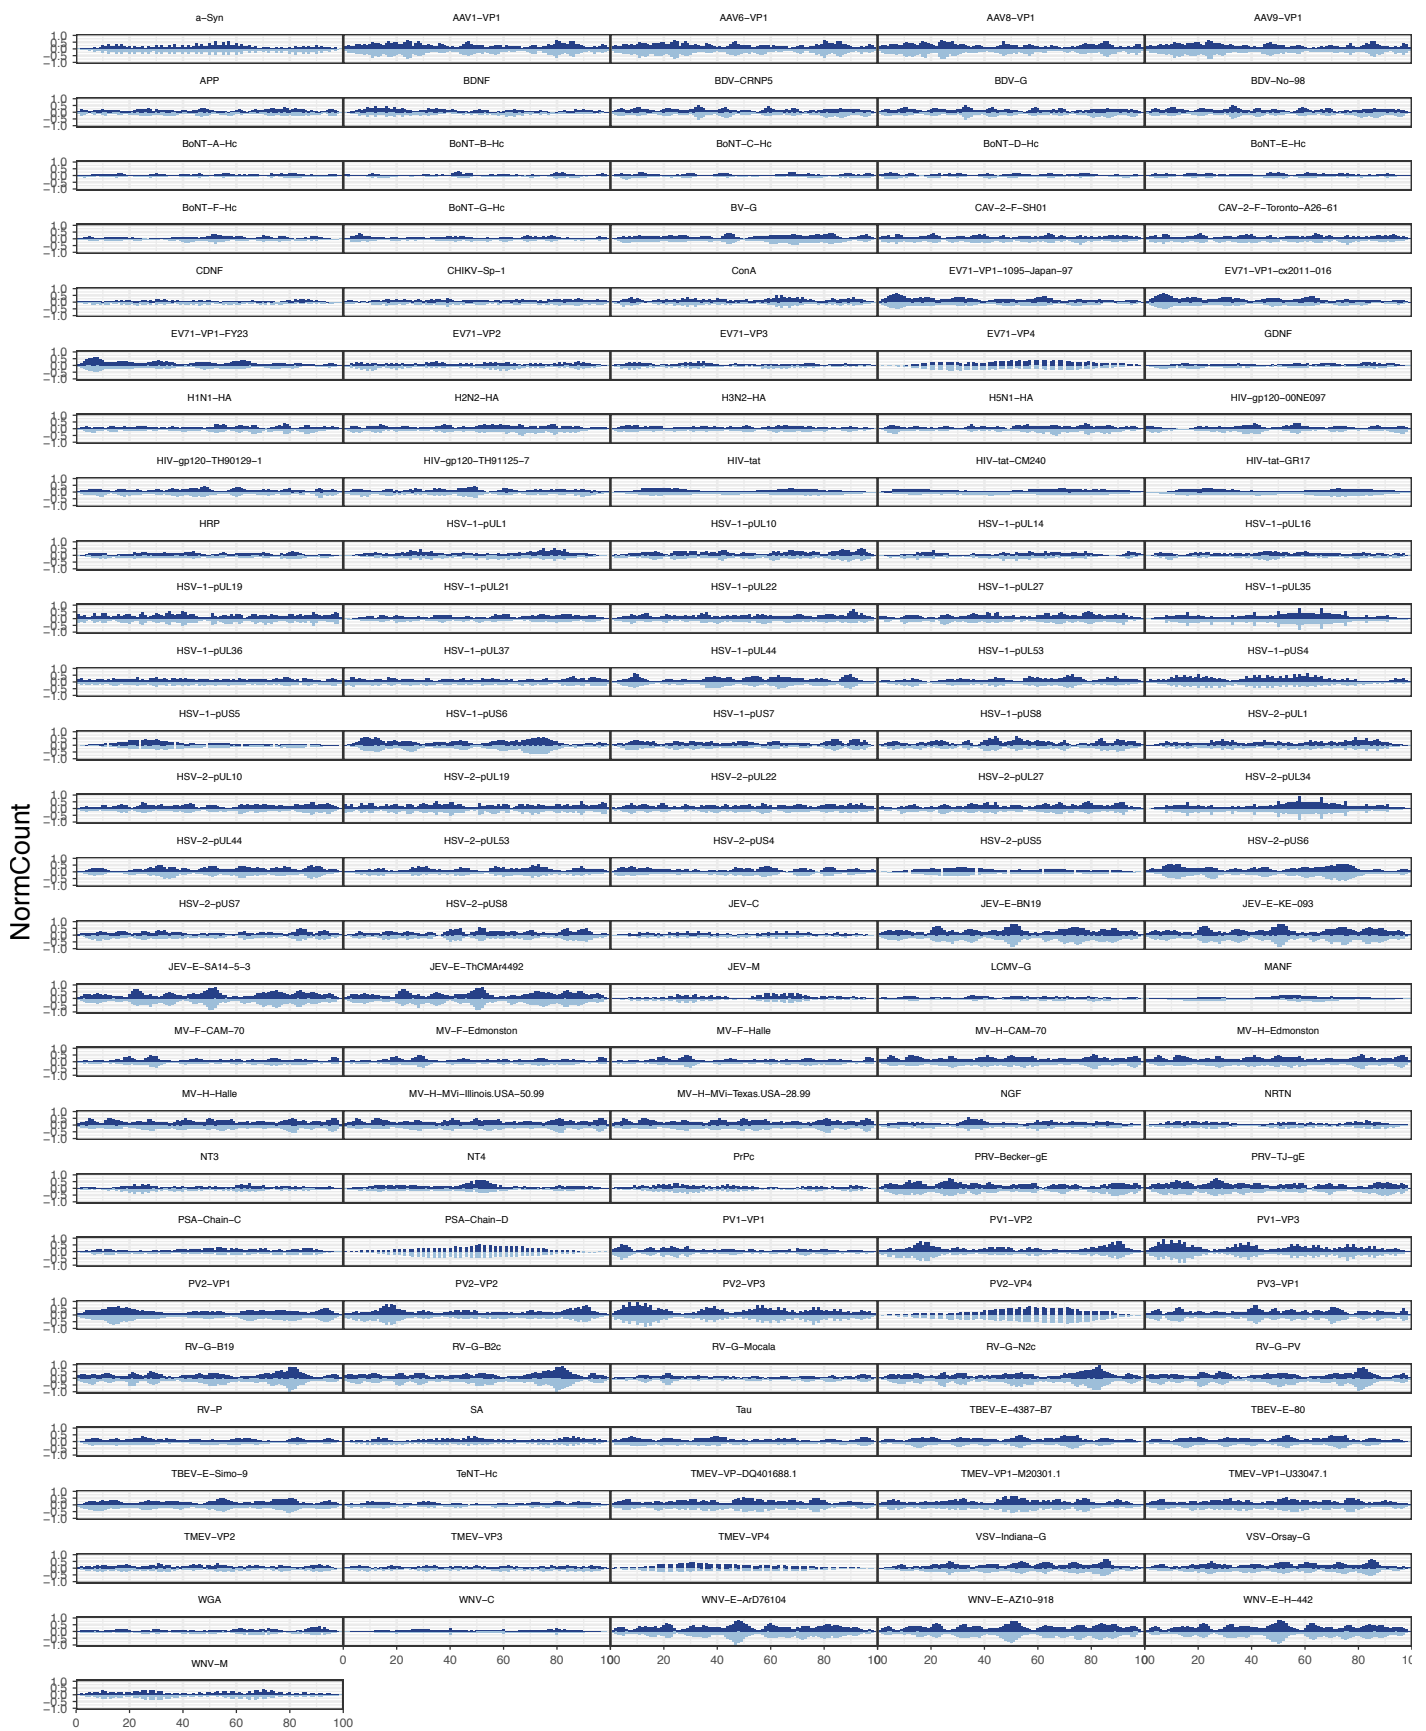

Aapro

Library DNA\_AAVlib\_DNase\_30cpc DNA\_AAVlib\_DNase\_3cpc

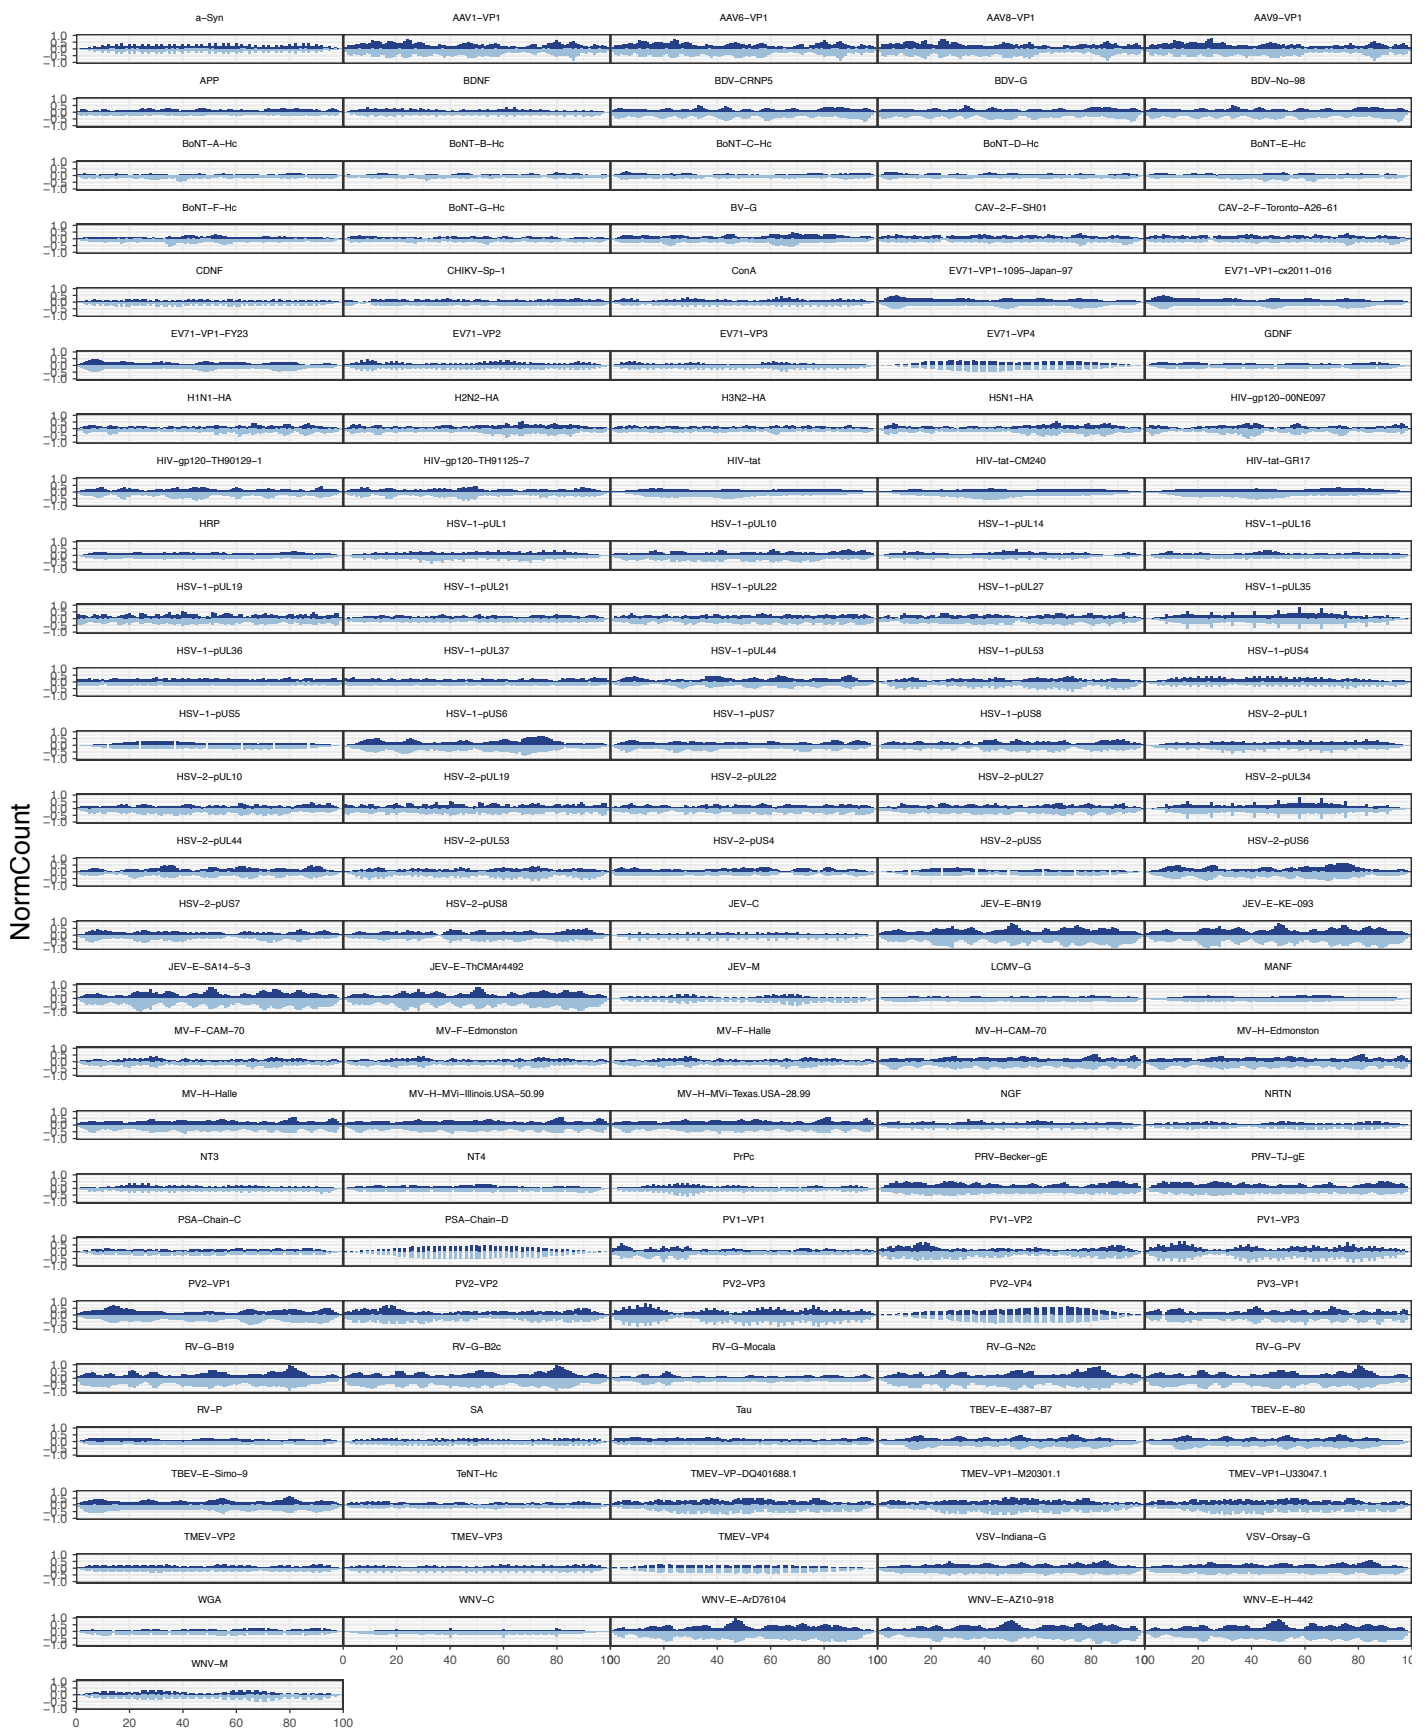

Aapro

Library ■ DNA\_AAVlib\_DNase\_30cpc ■ DNA\_pscAAVlib\_Prep2

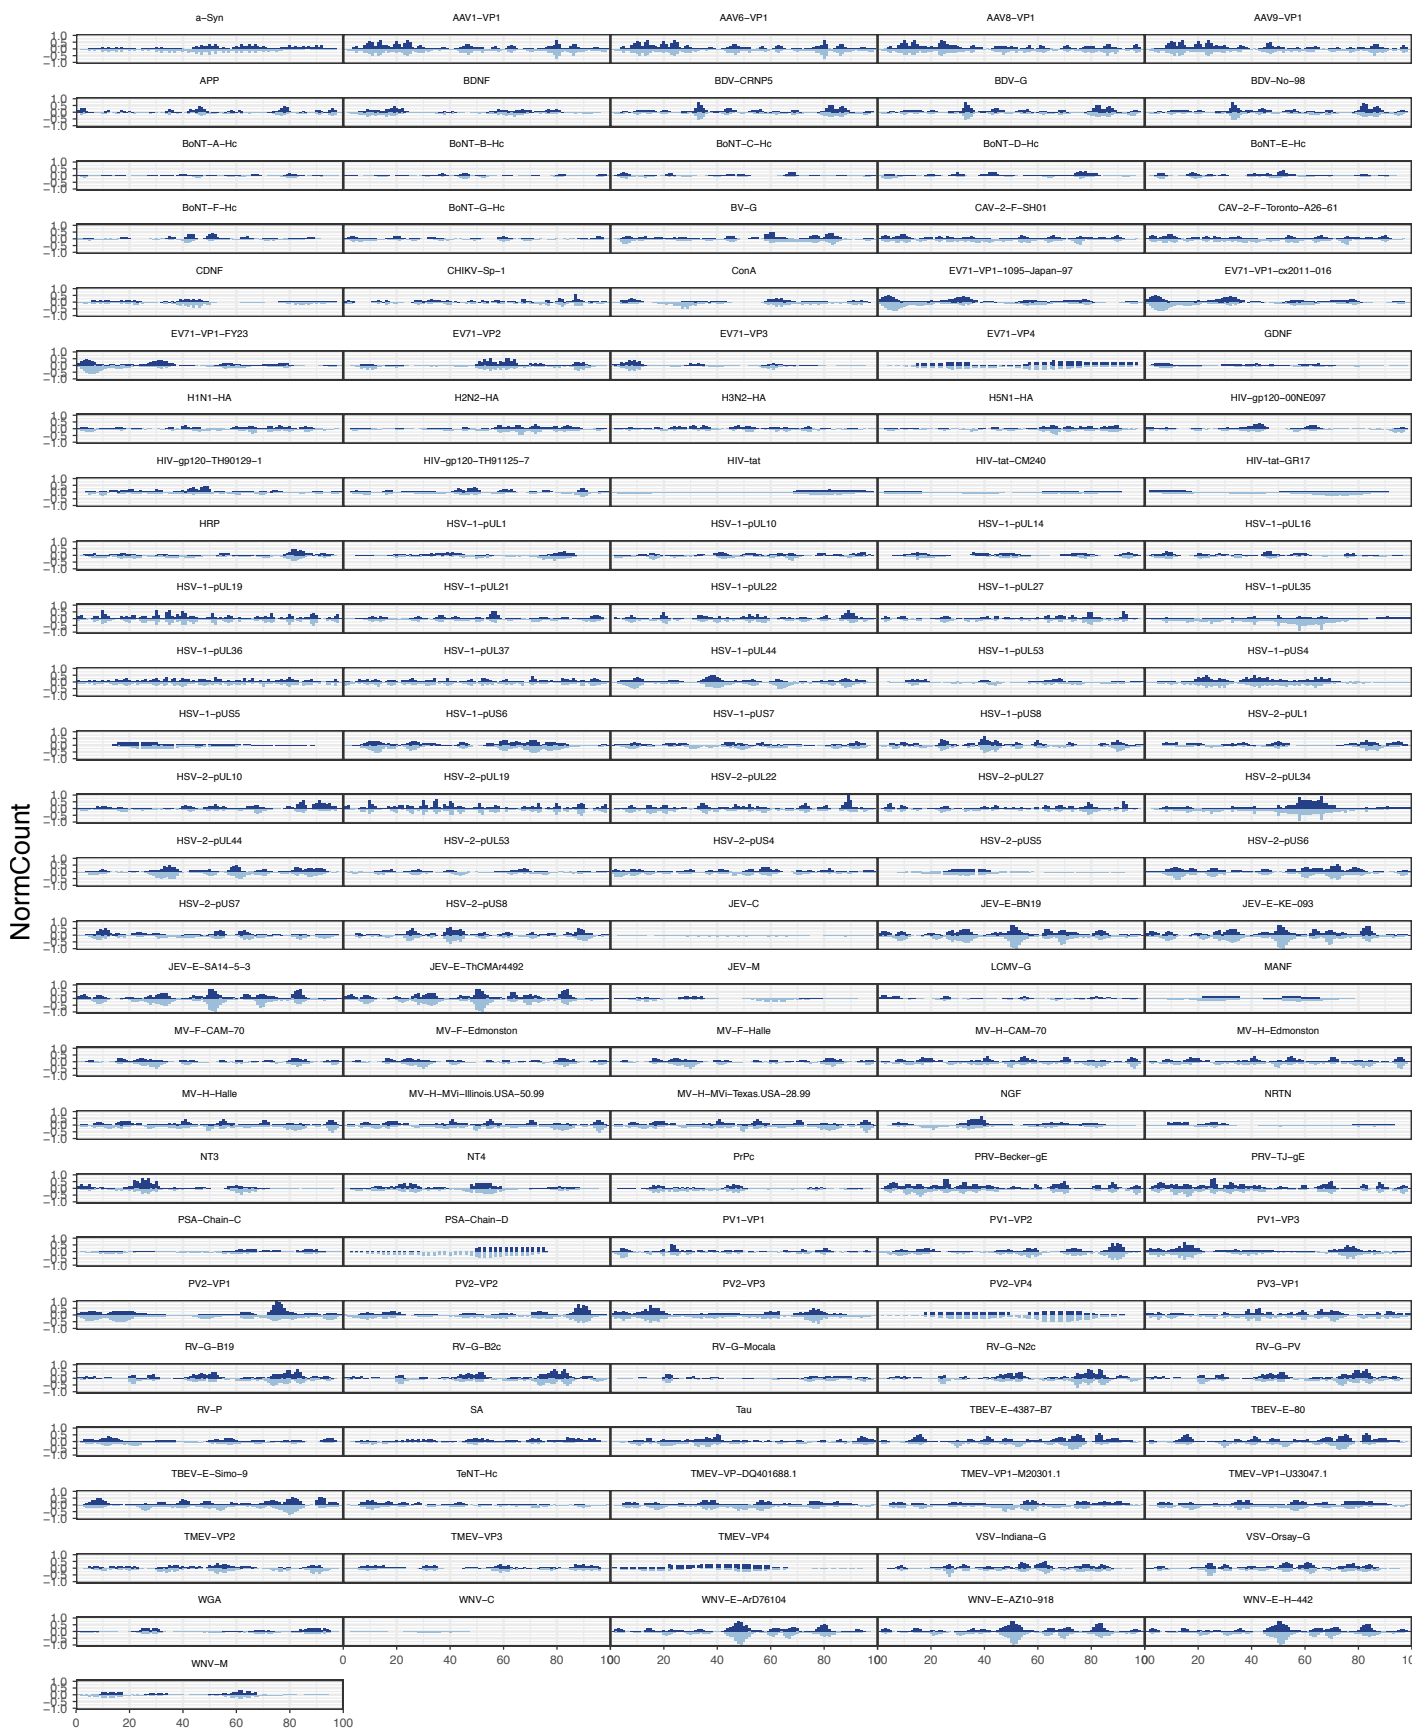

Aapro

Library mRNA\_30cpc\_Str mRNA\_30cpc\_Trsp



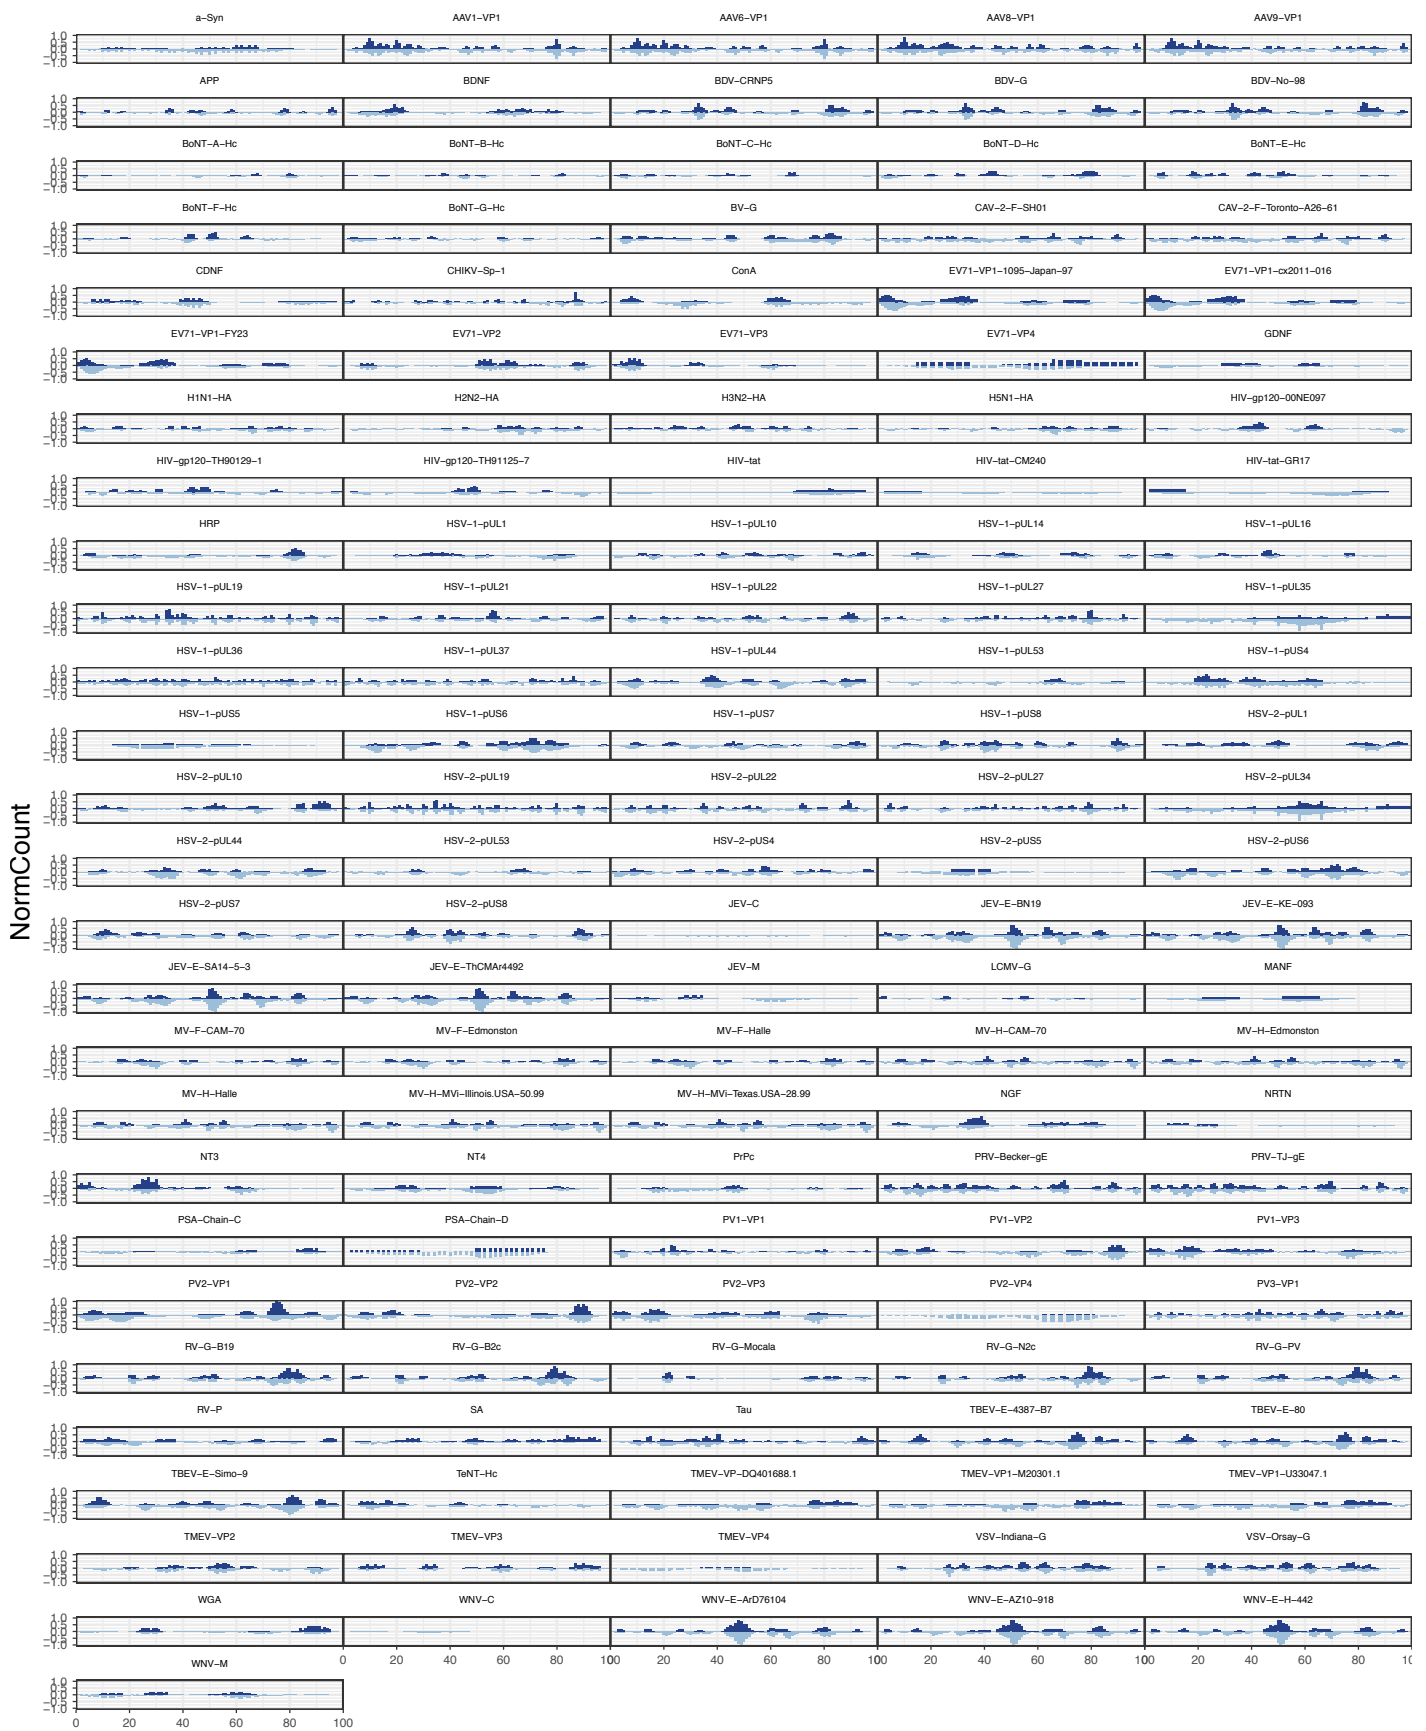

Aapro

Library mRNA\_30cpc\_Str mRNA\_30cpc\_Th

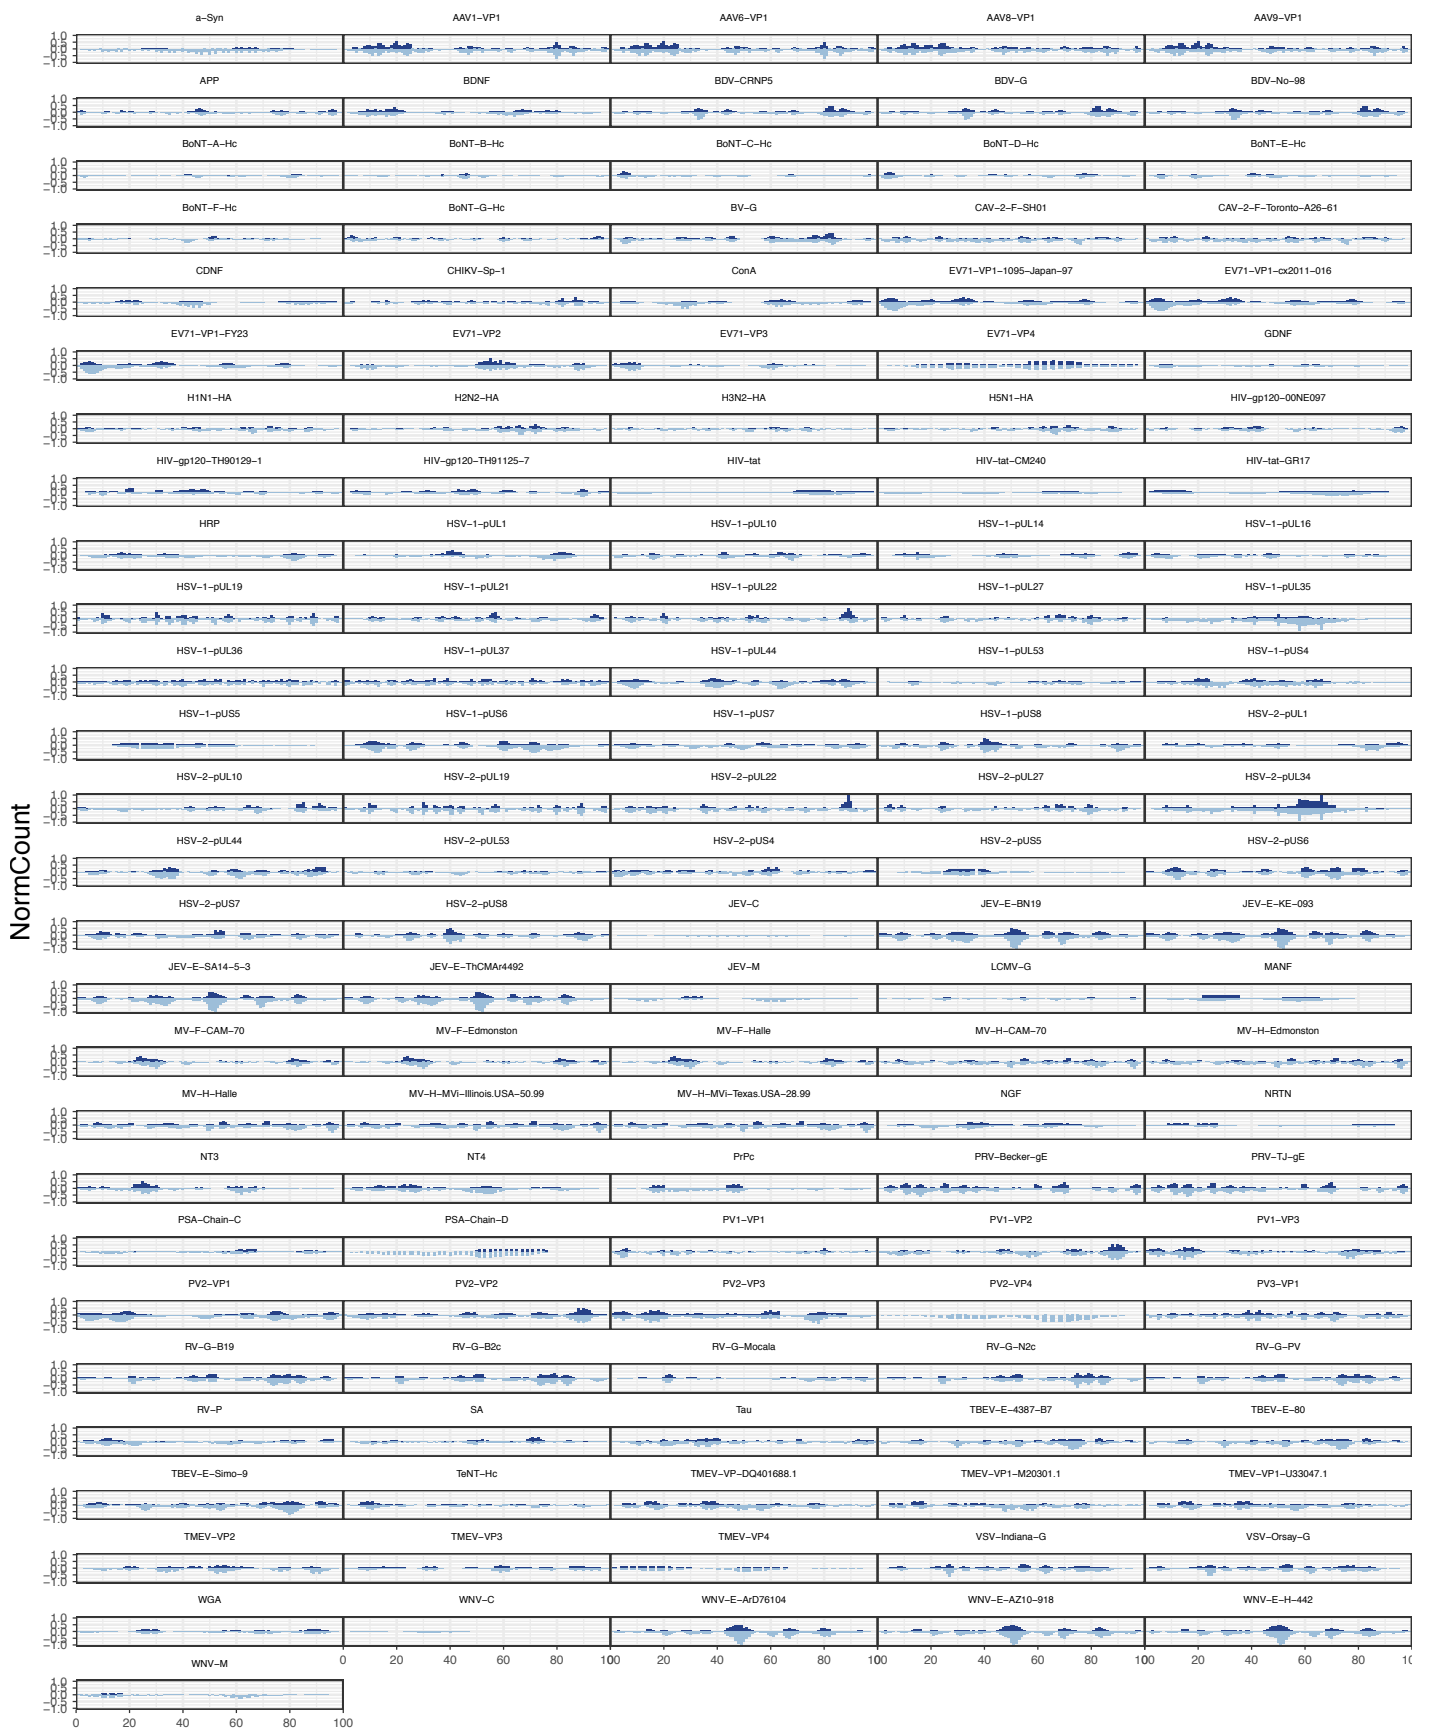

Aaproc

Library ■ mRNA\_30cpc\_Ctx ■ mRNA\_30cpc\_Str

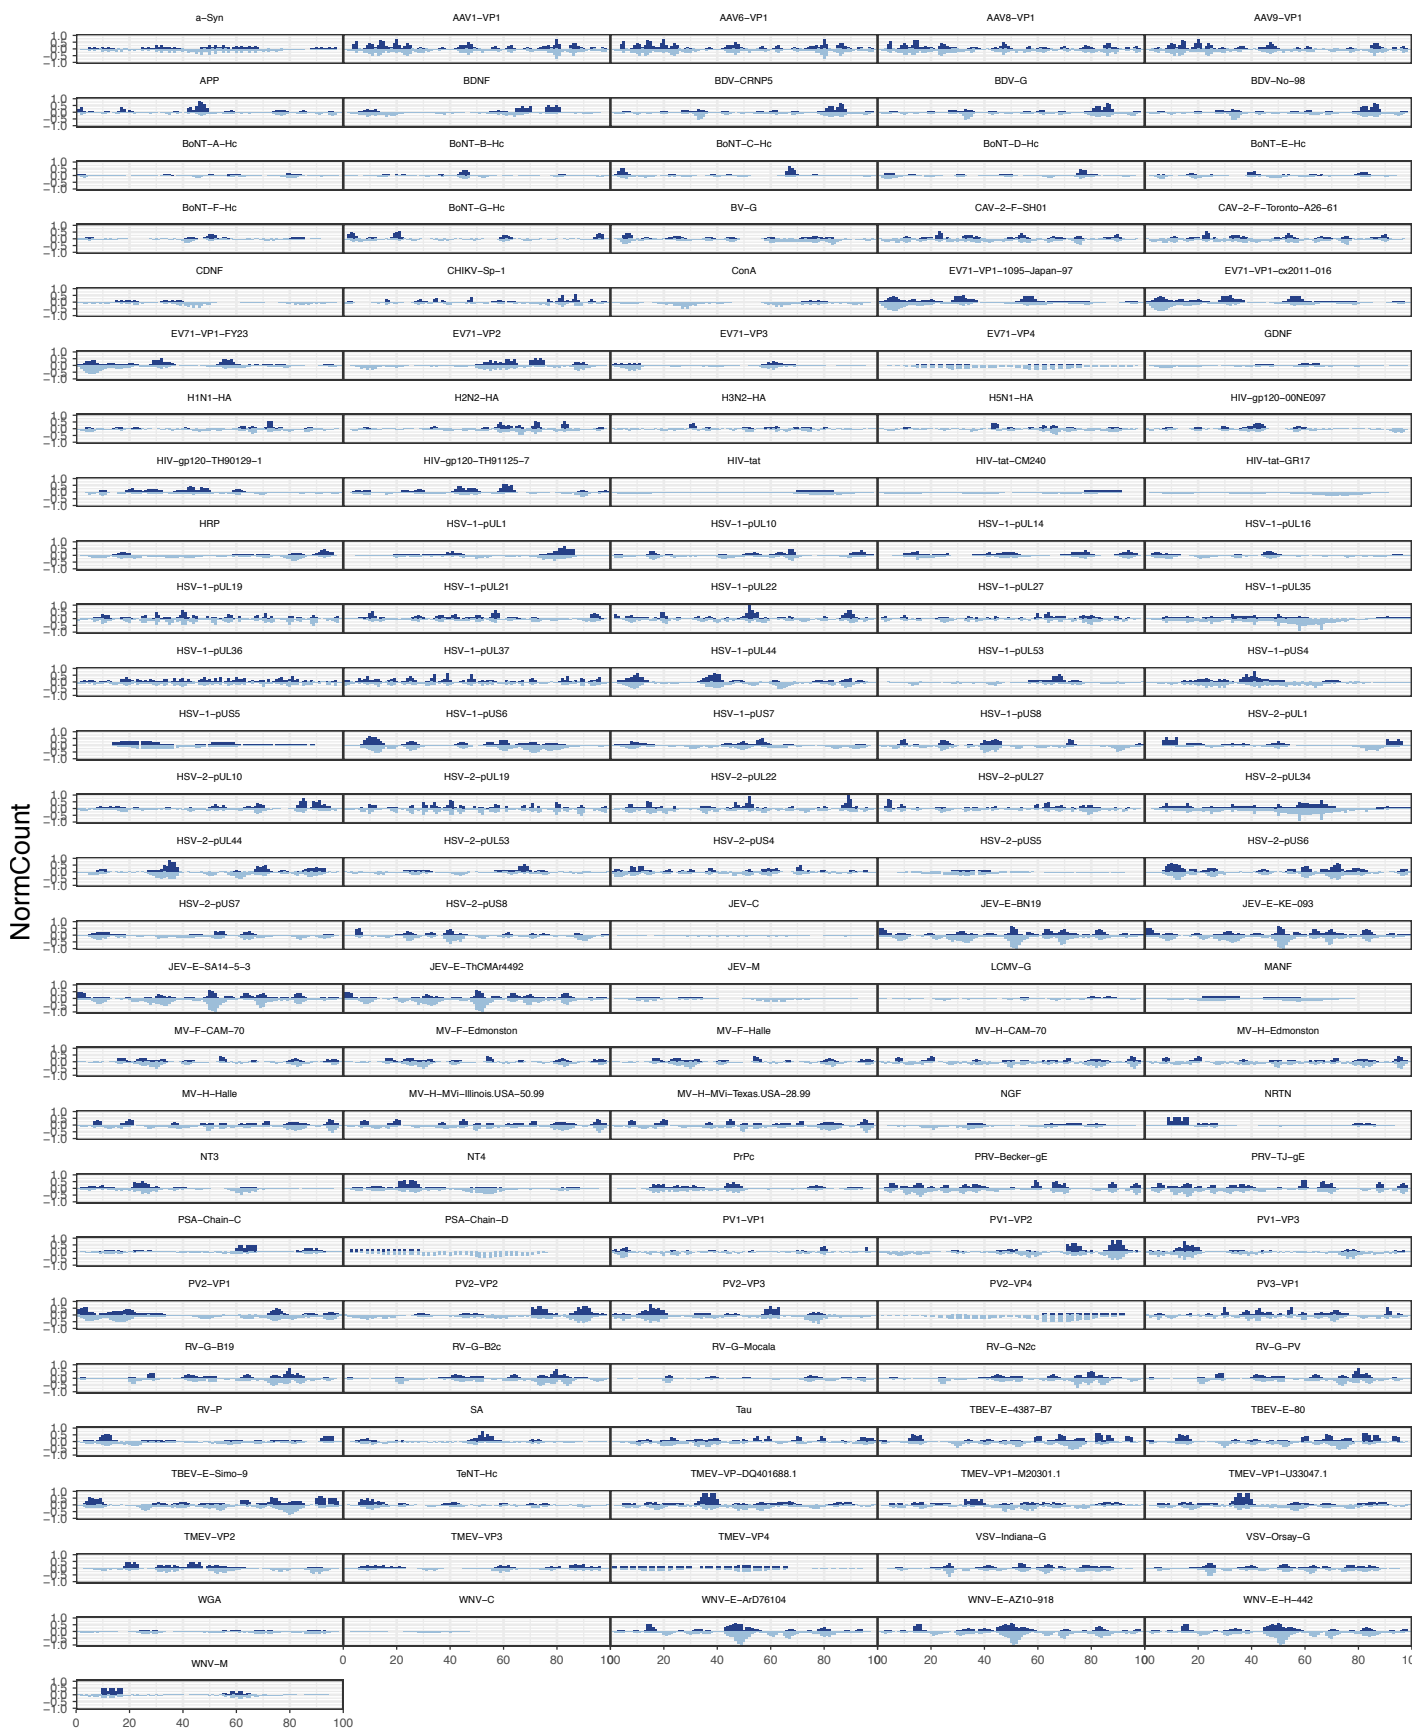

Aaproc

Library ■ mRNA\_30cpc\_SN ■ mRNA\_30cpc\_Str

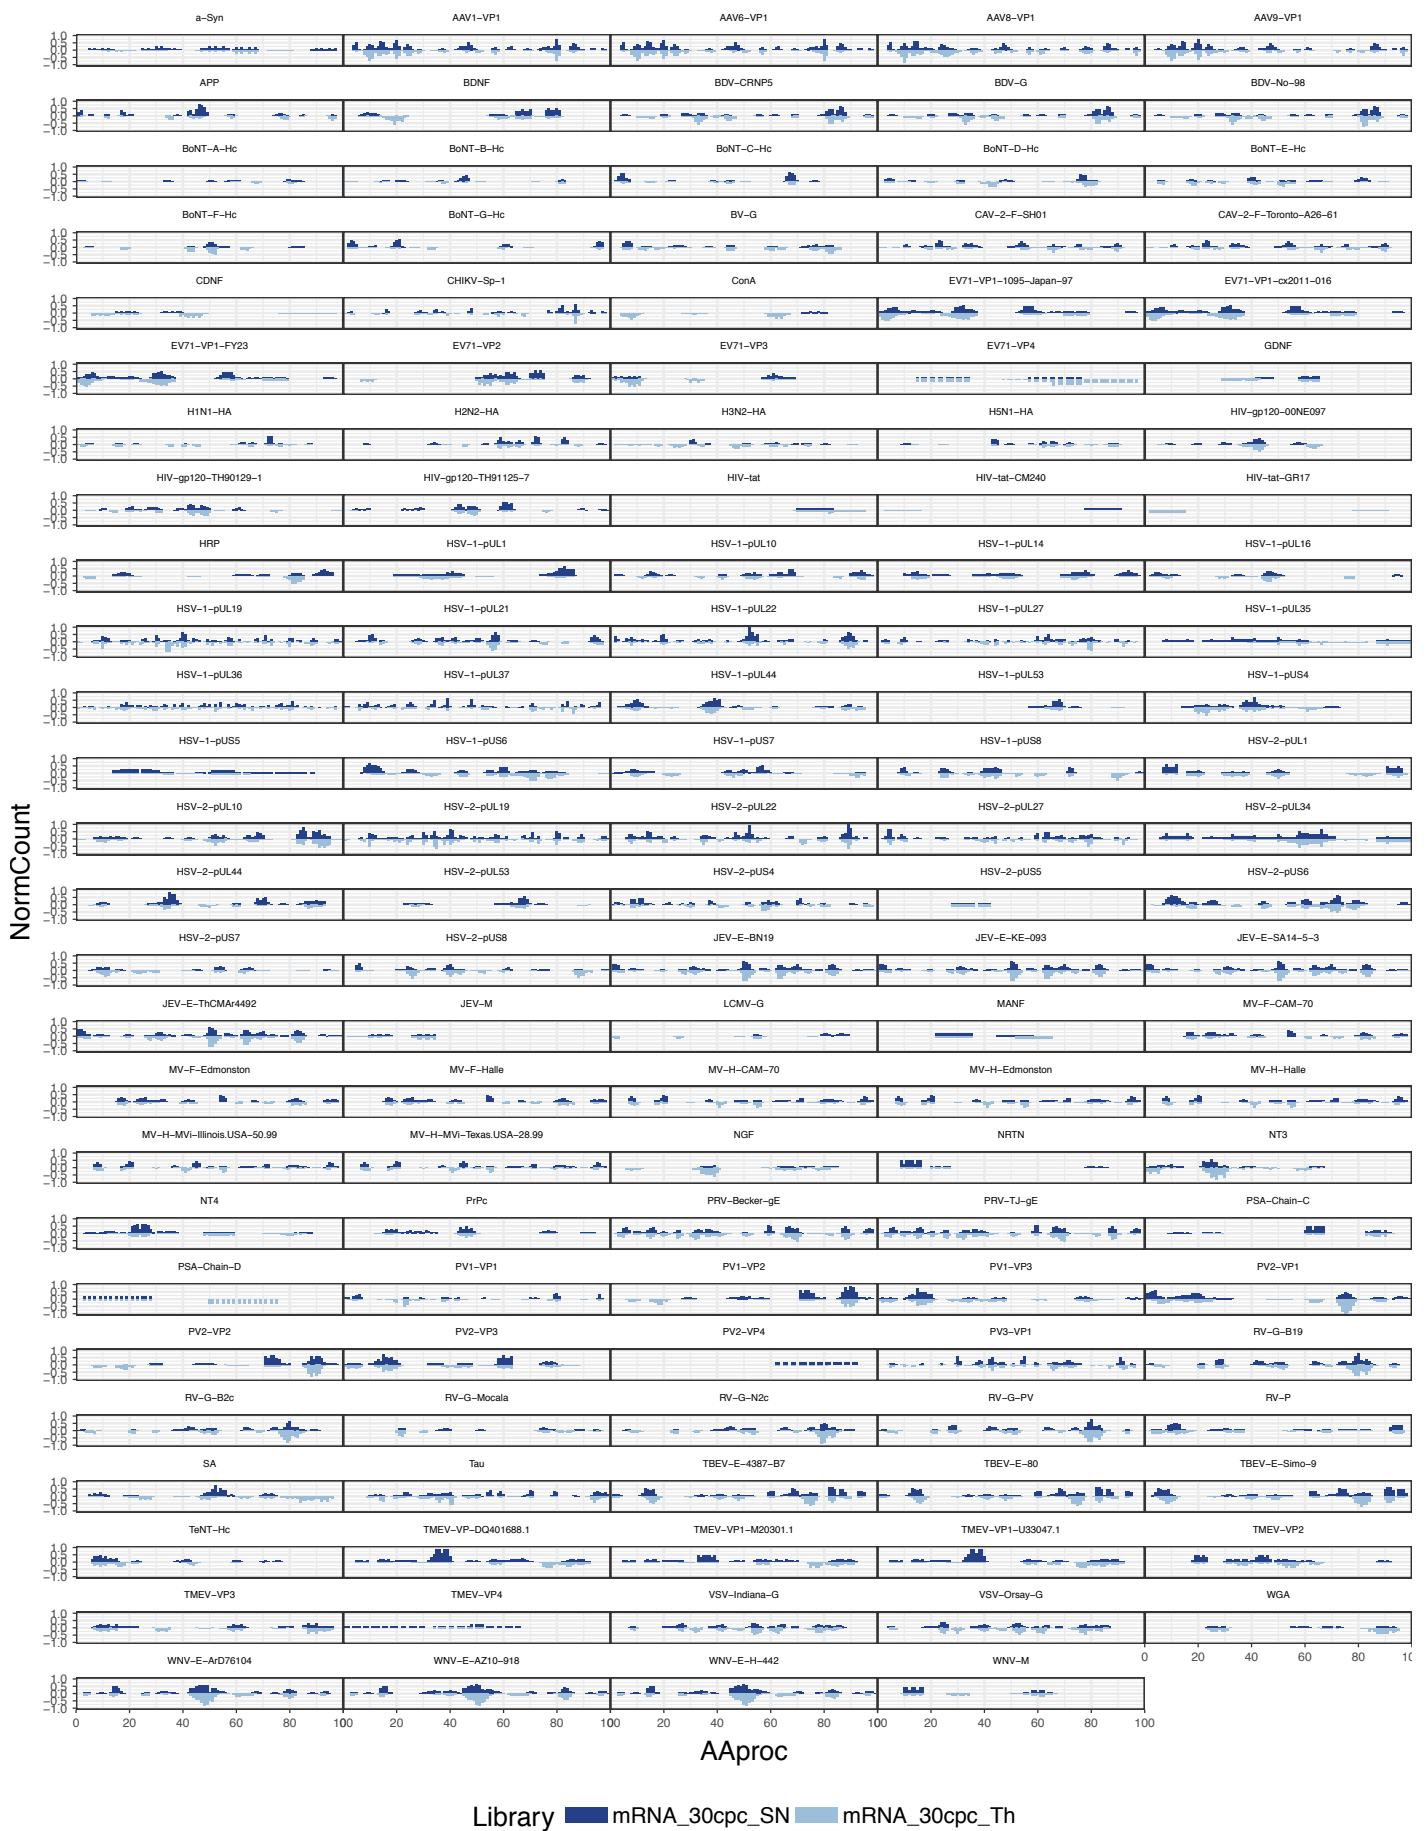

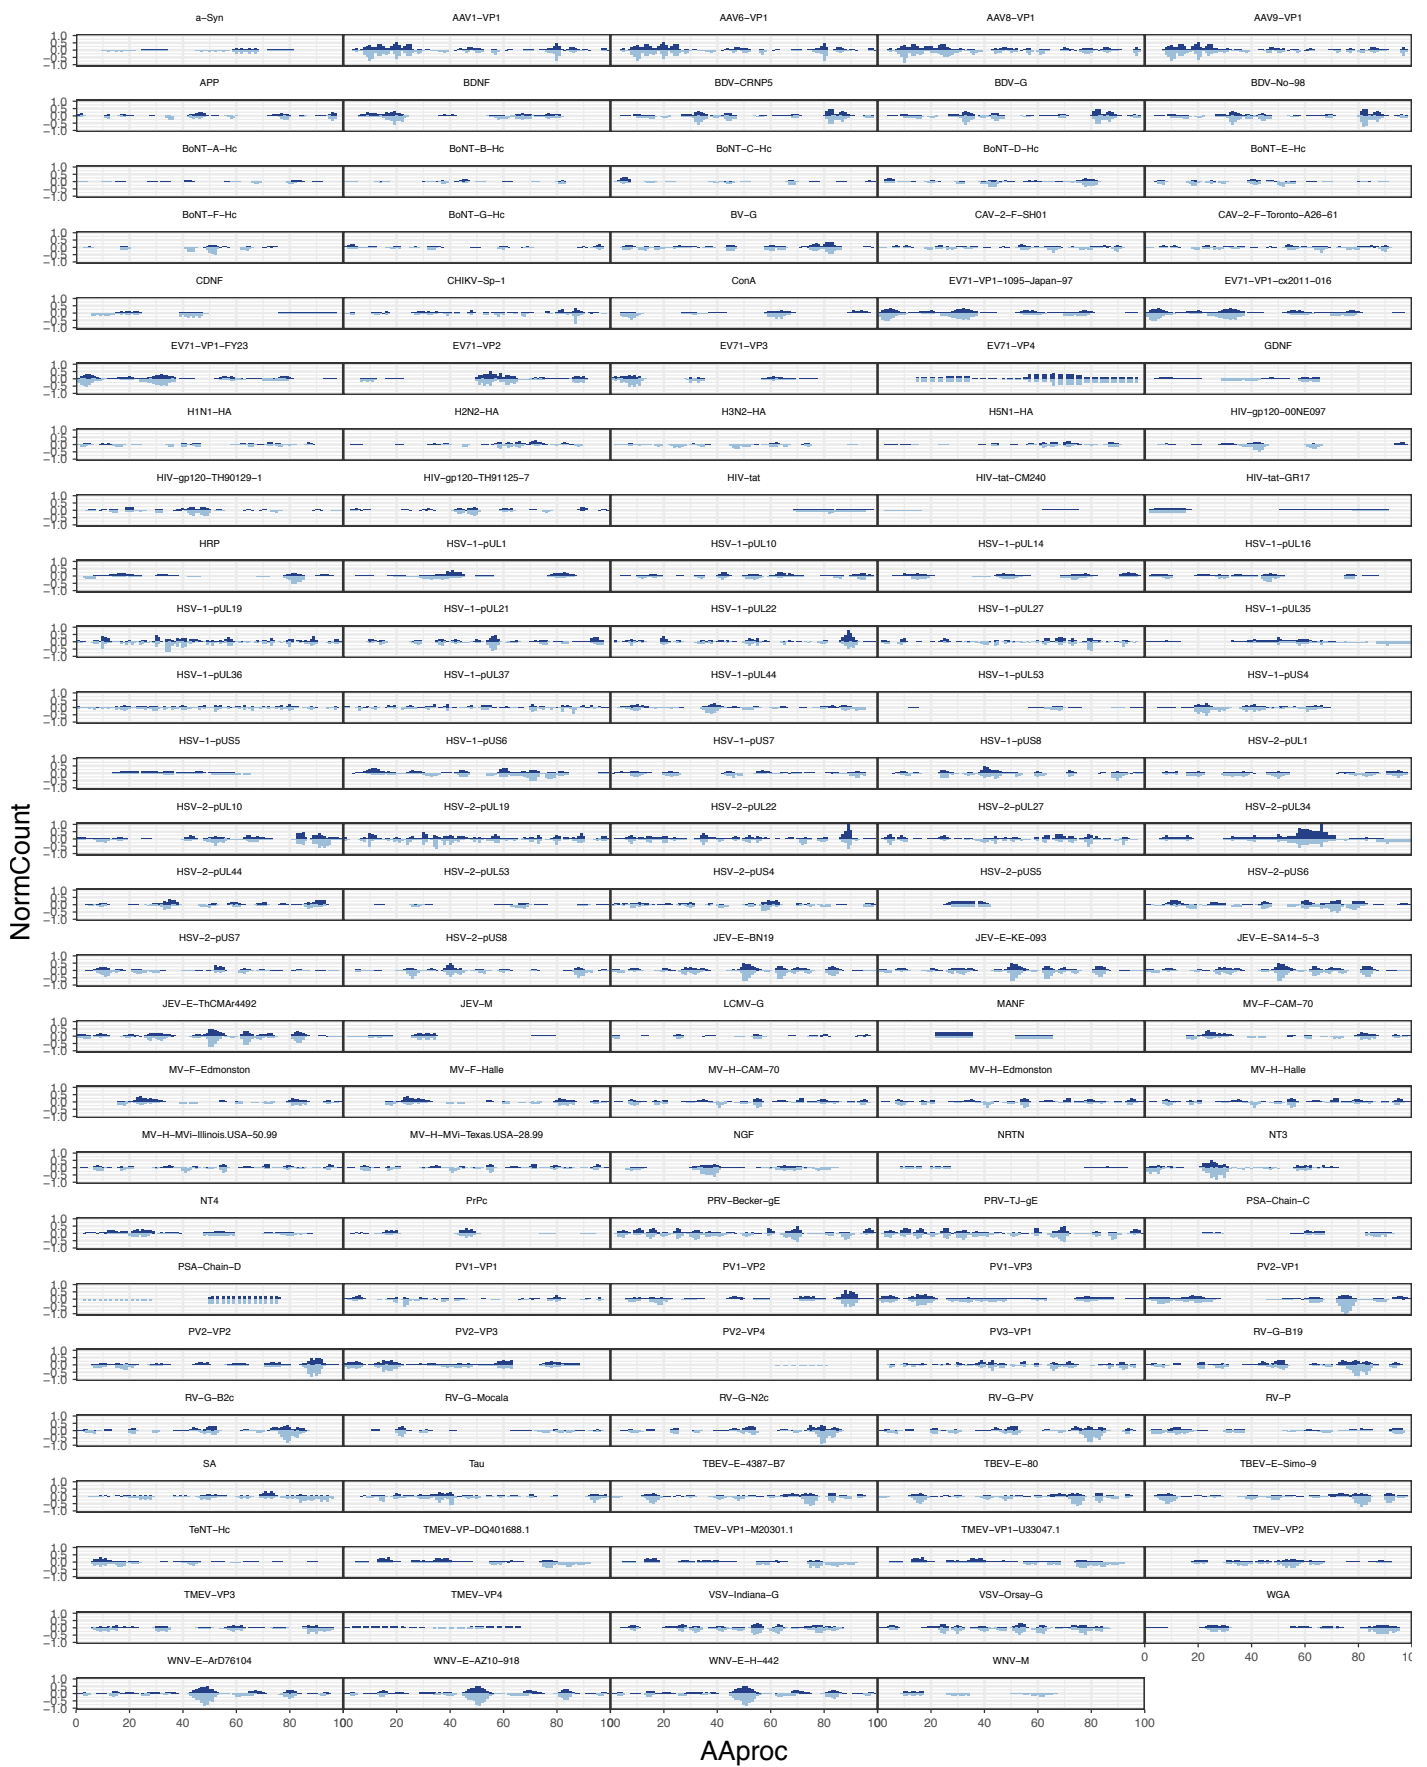

Library ■ mRNA\_30cpc\_Ctx ■ mRNA\_30cpc\_Th

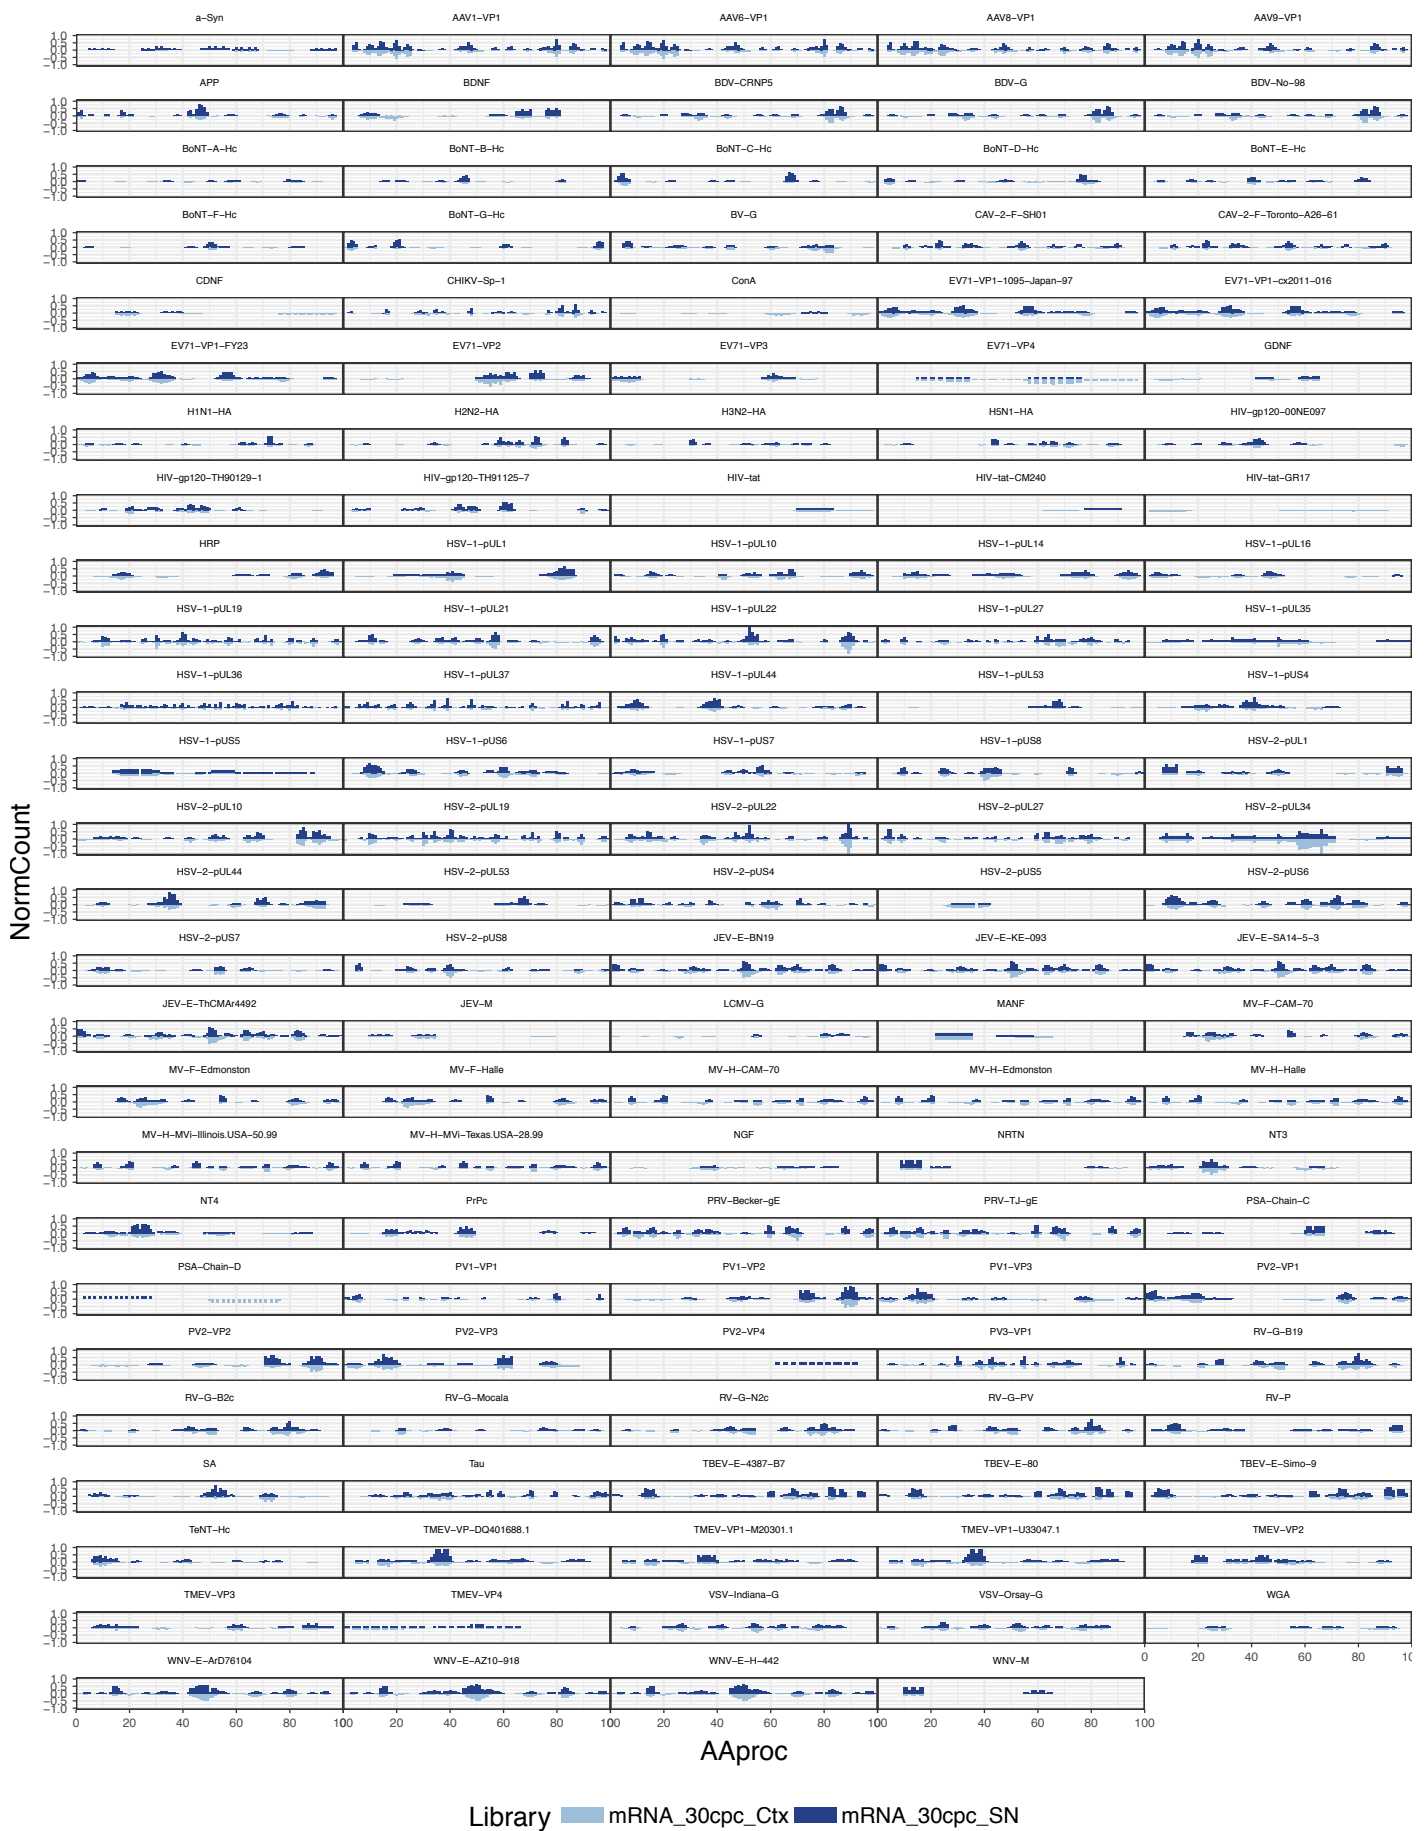

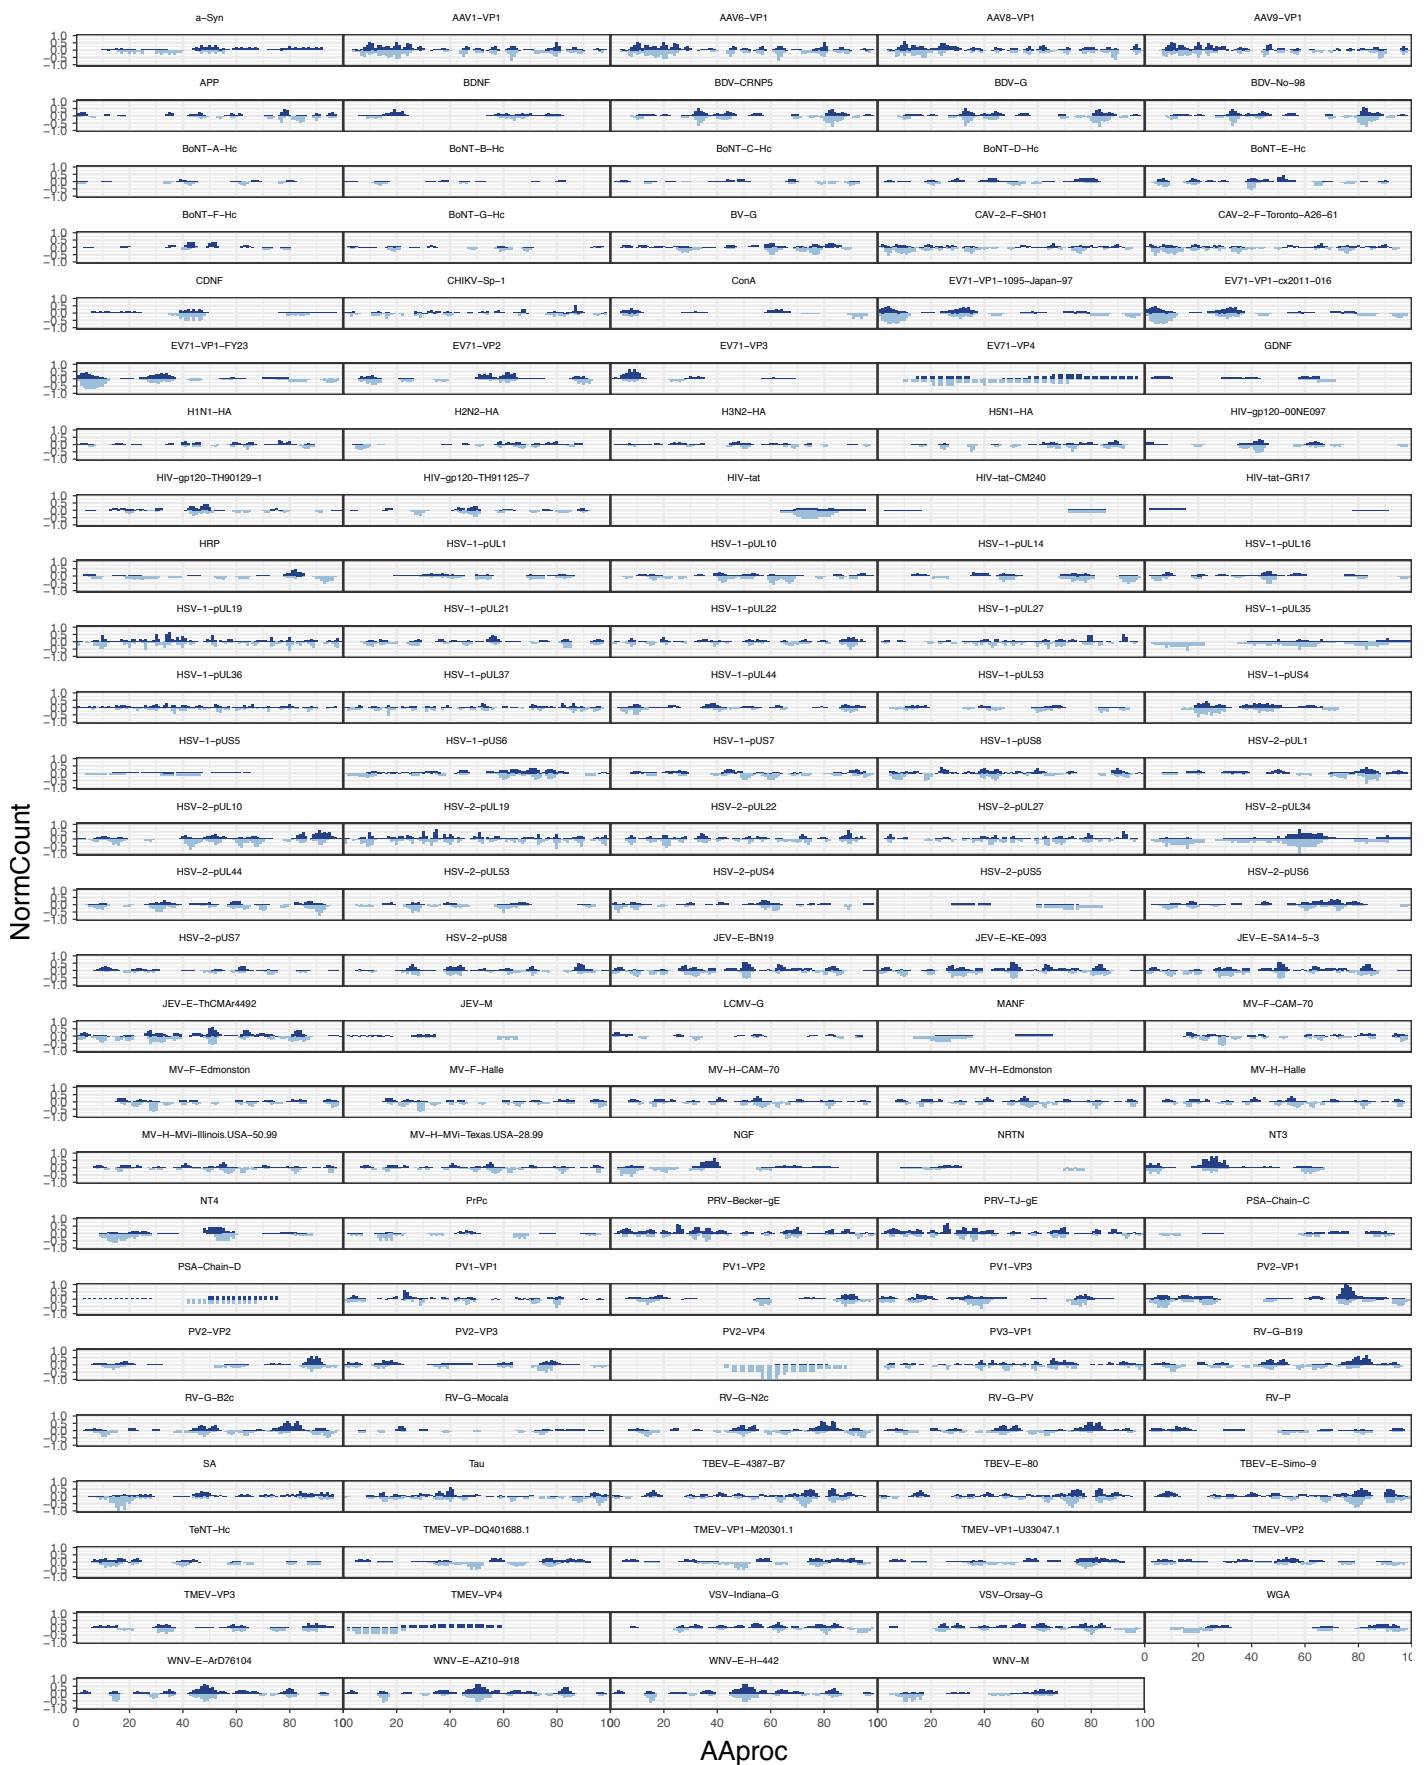

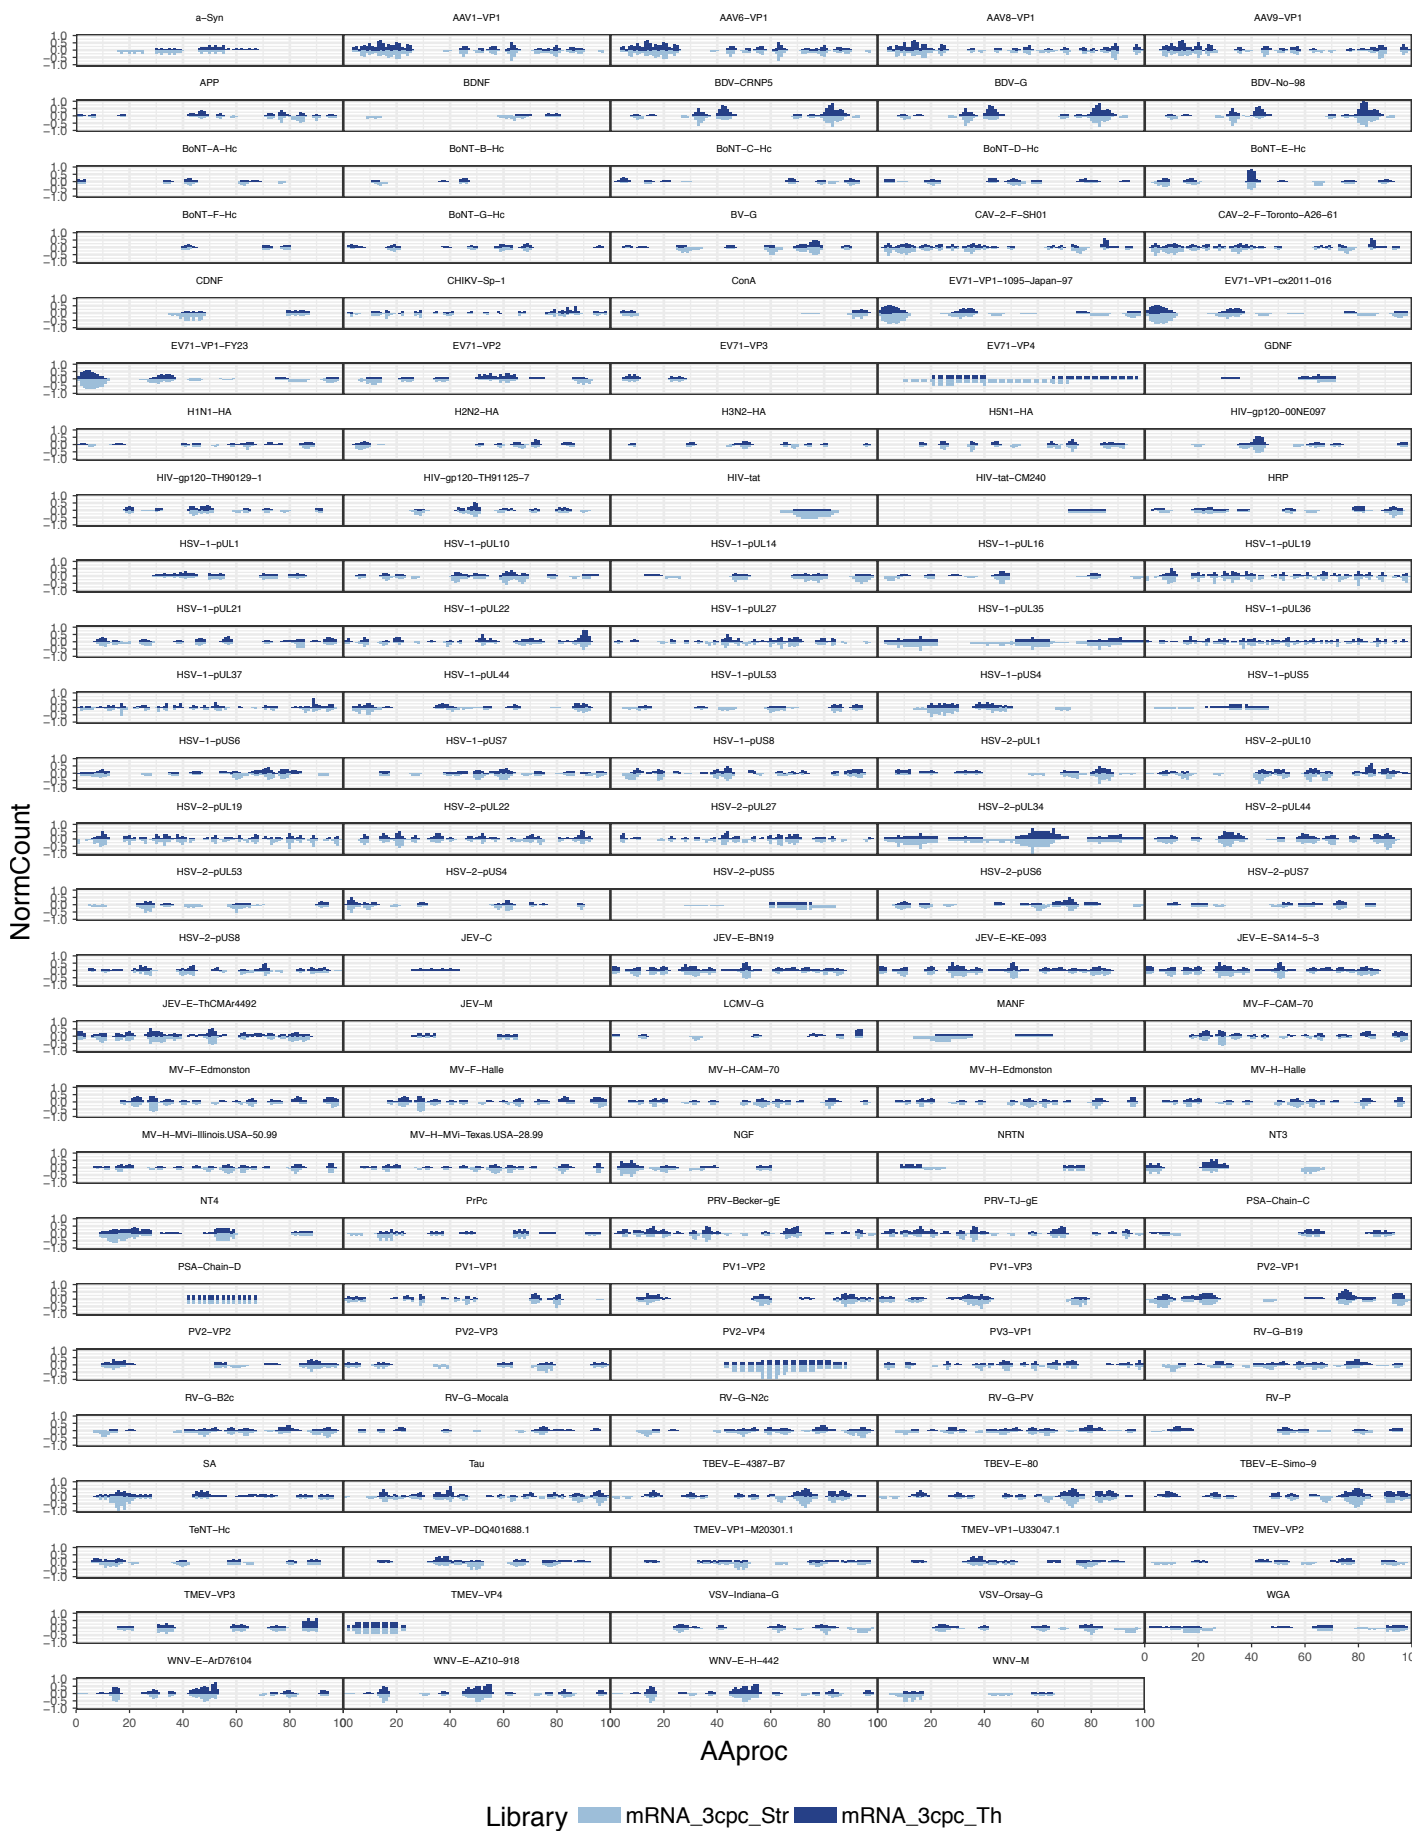



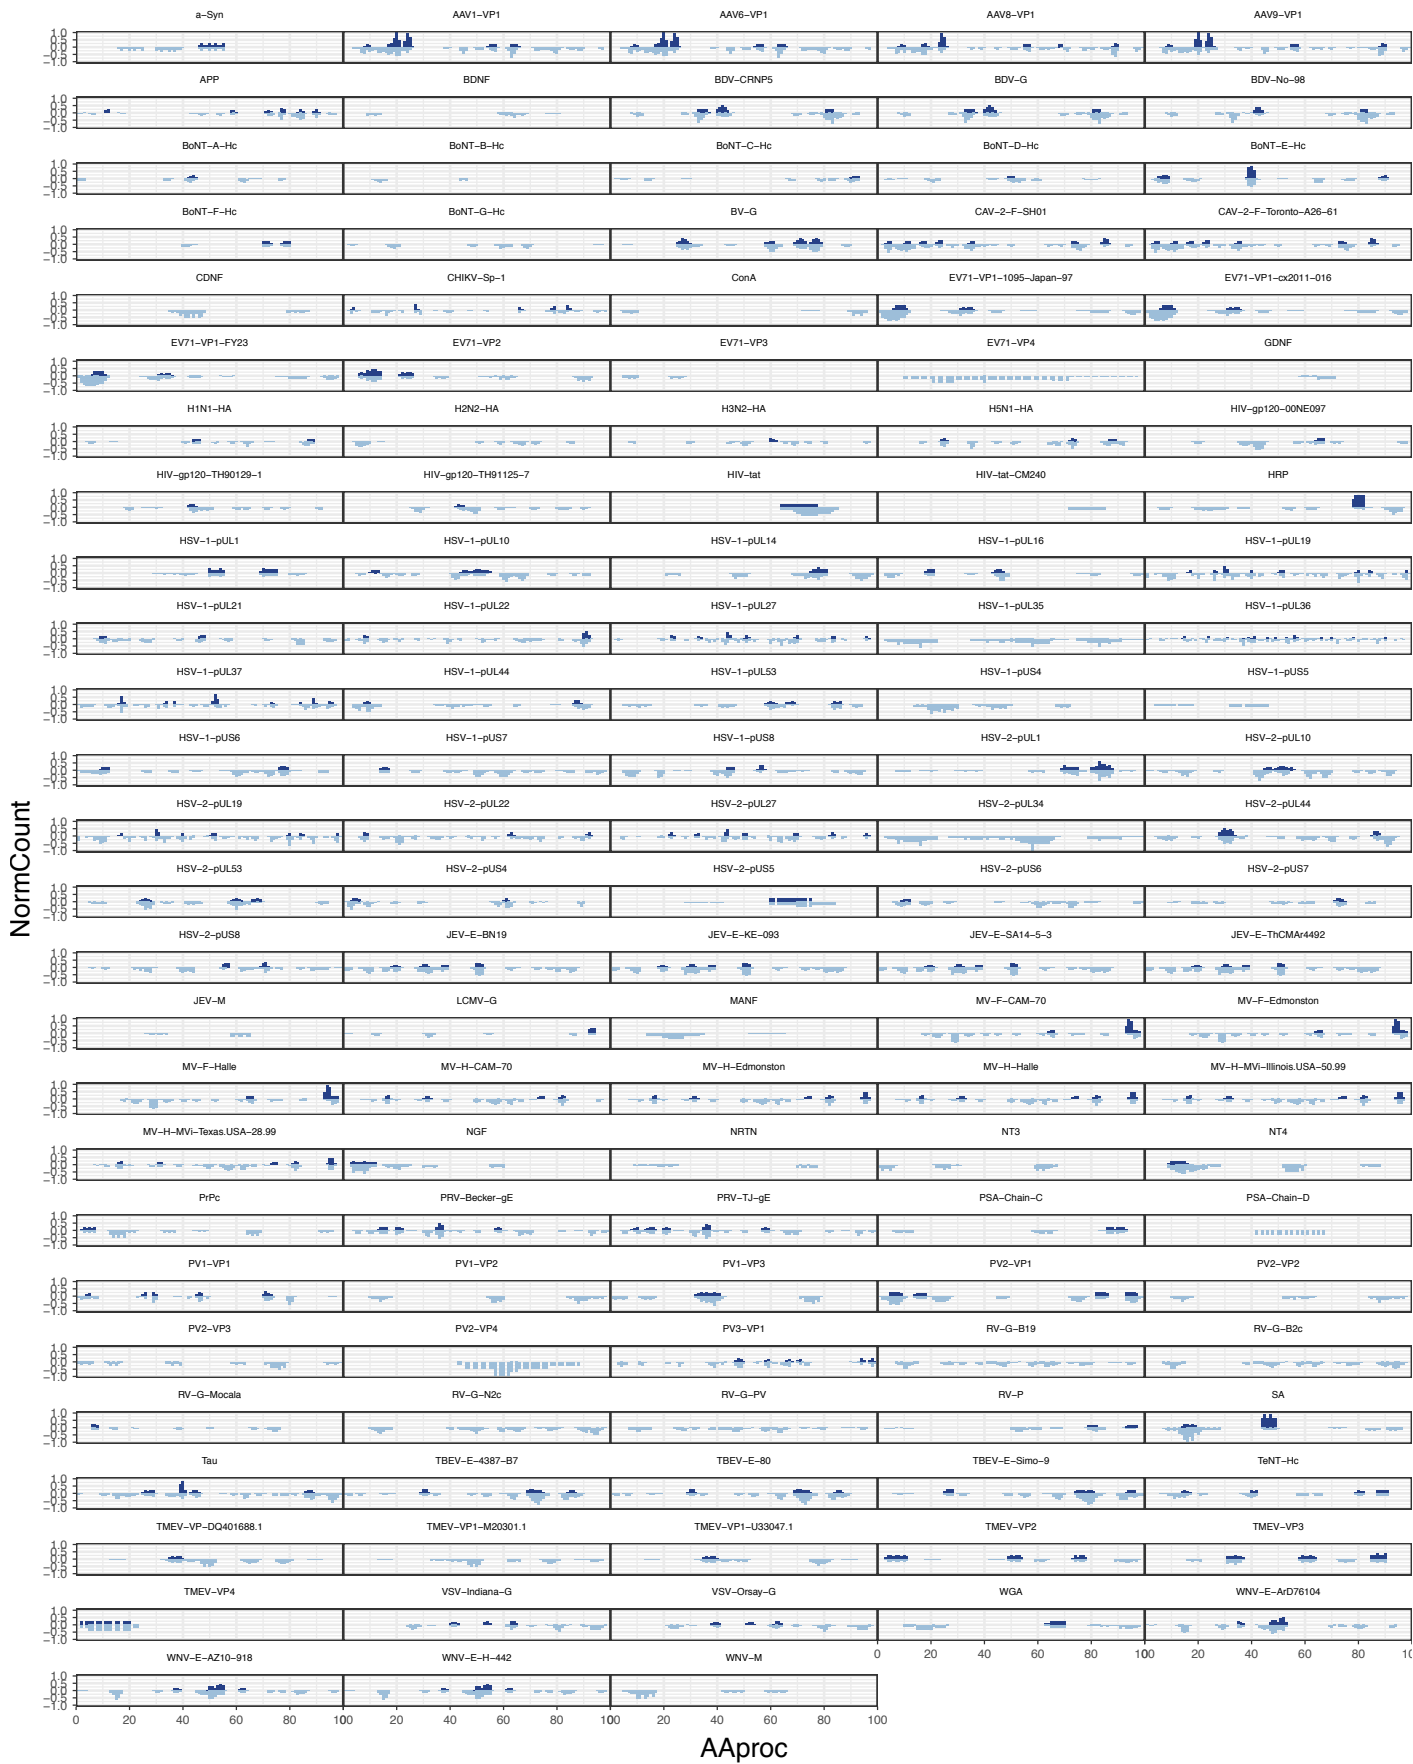

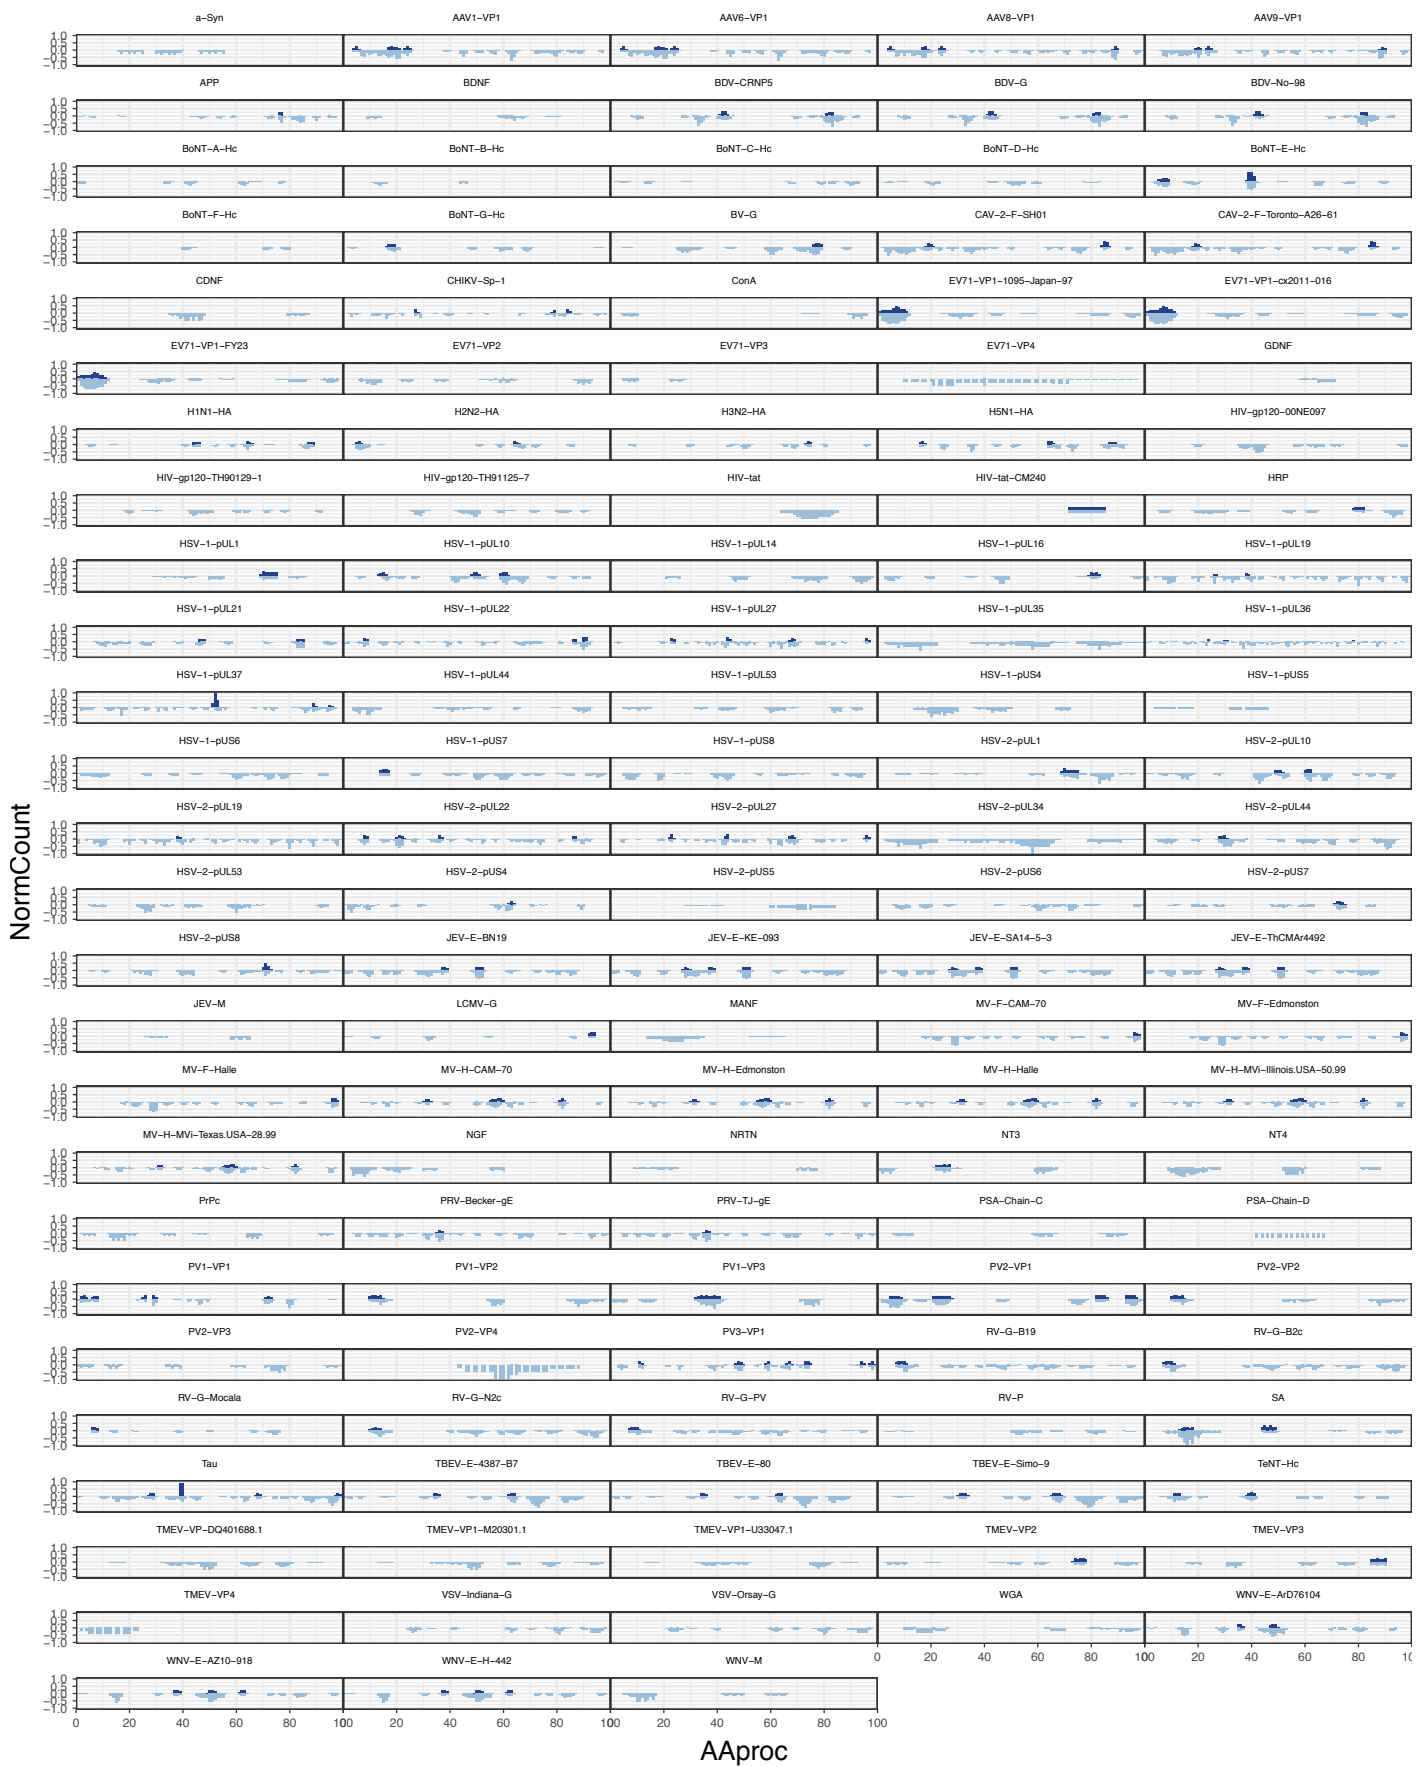

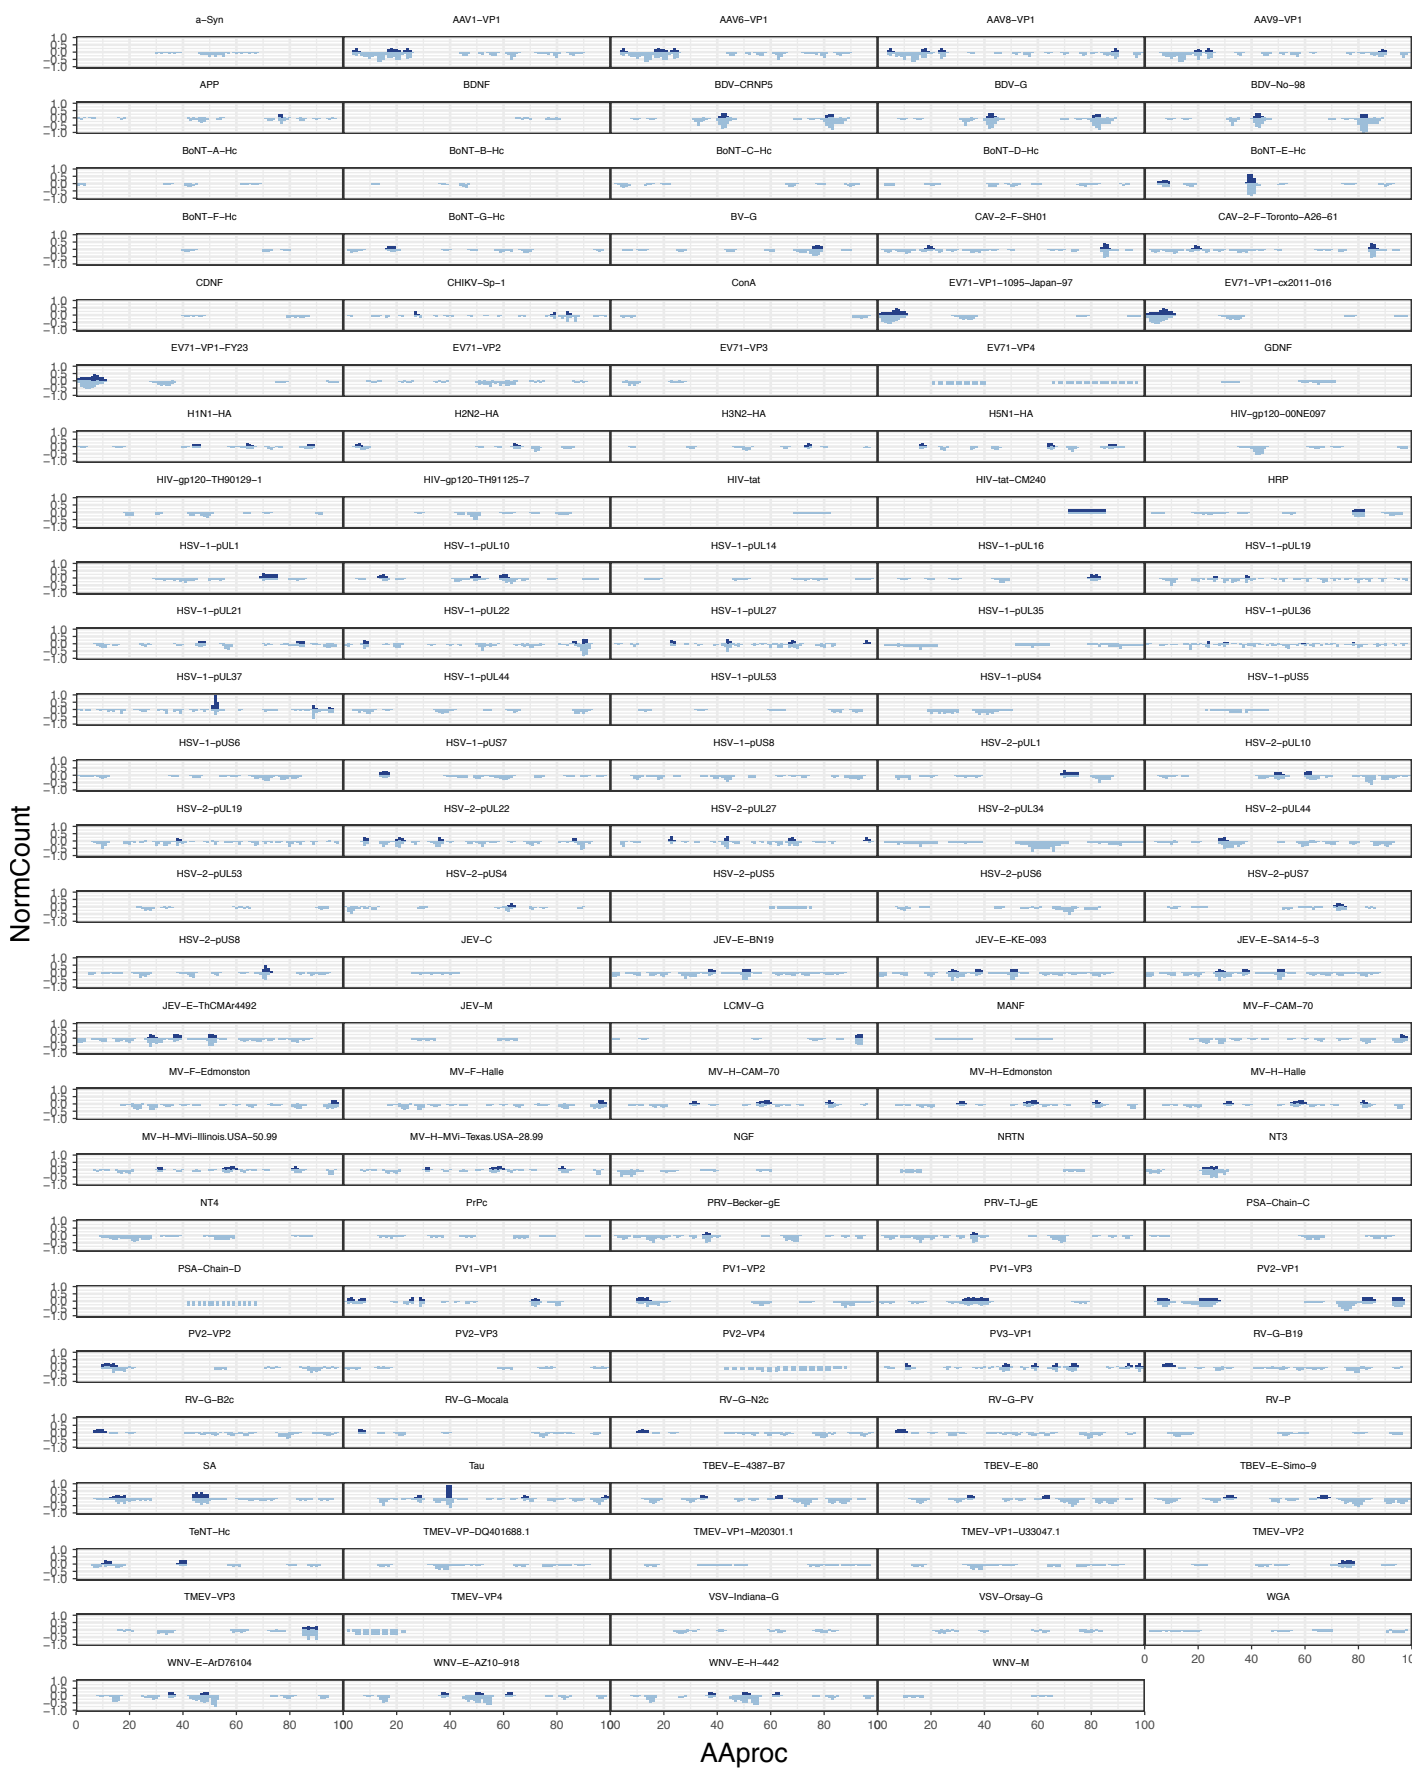

Library ■ mRNA\_3cpc\_SN ■ mRNA\_3cpc\_Th

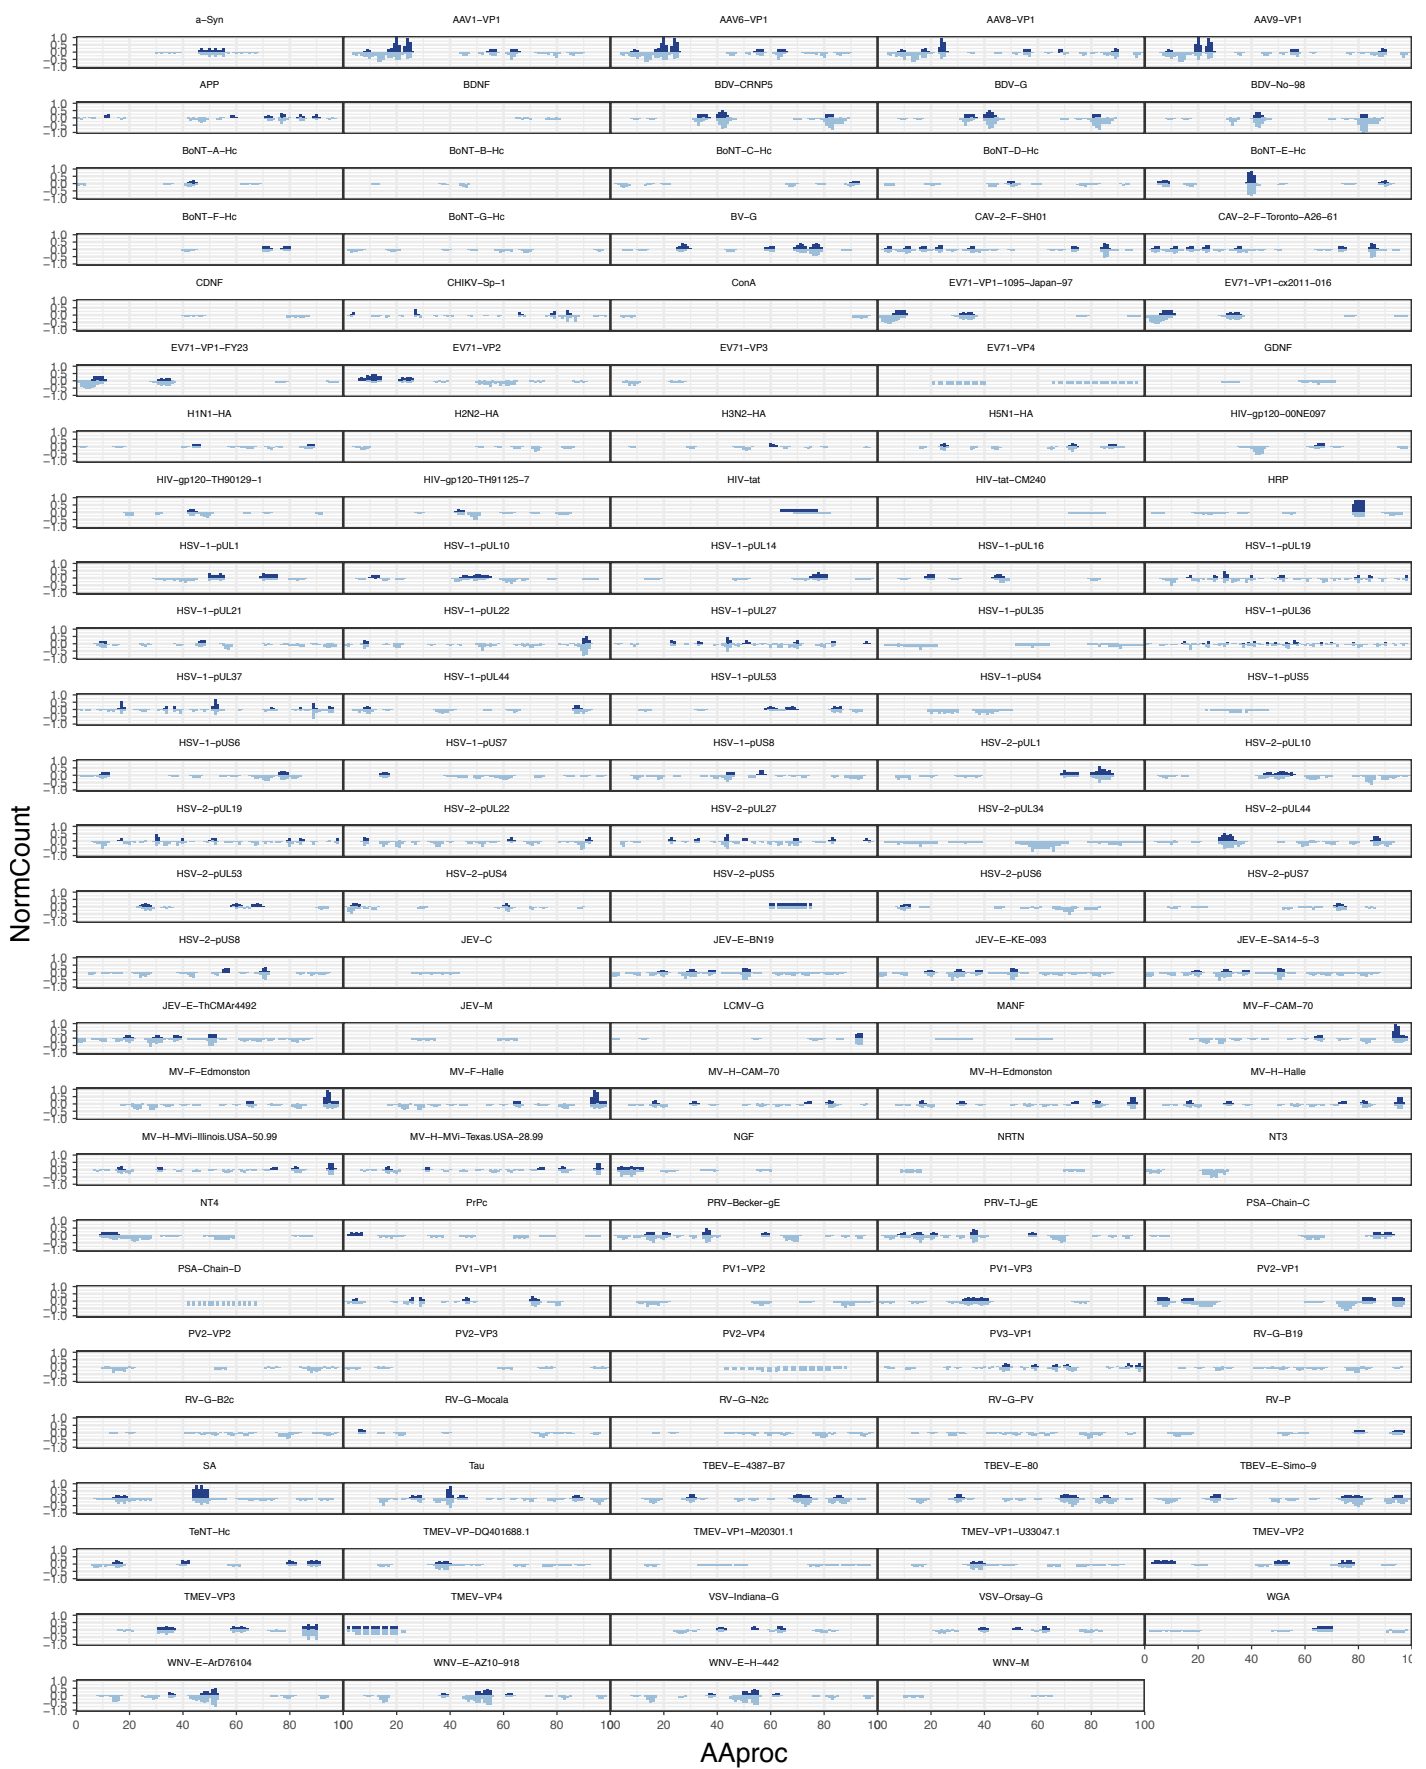

Library ■ mRNA\_3cpc\_Ctx ■ mRNA\_3cpc\_Th

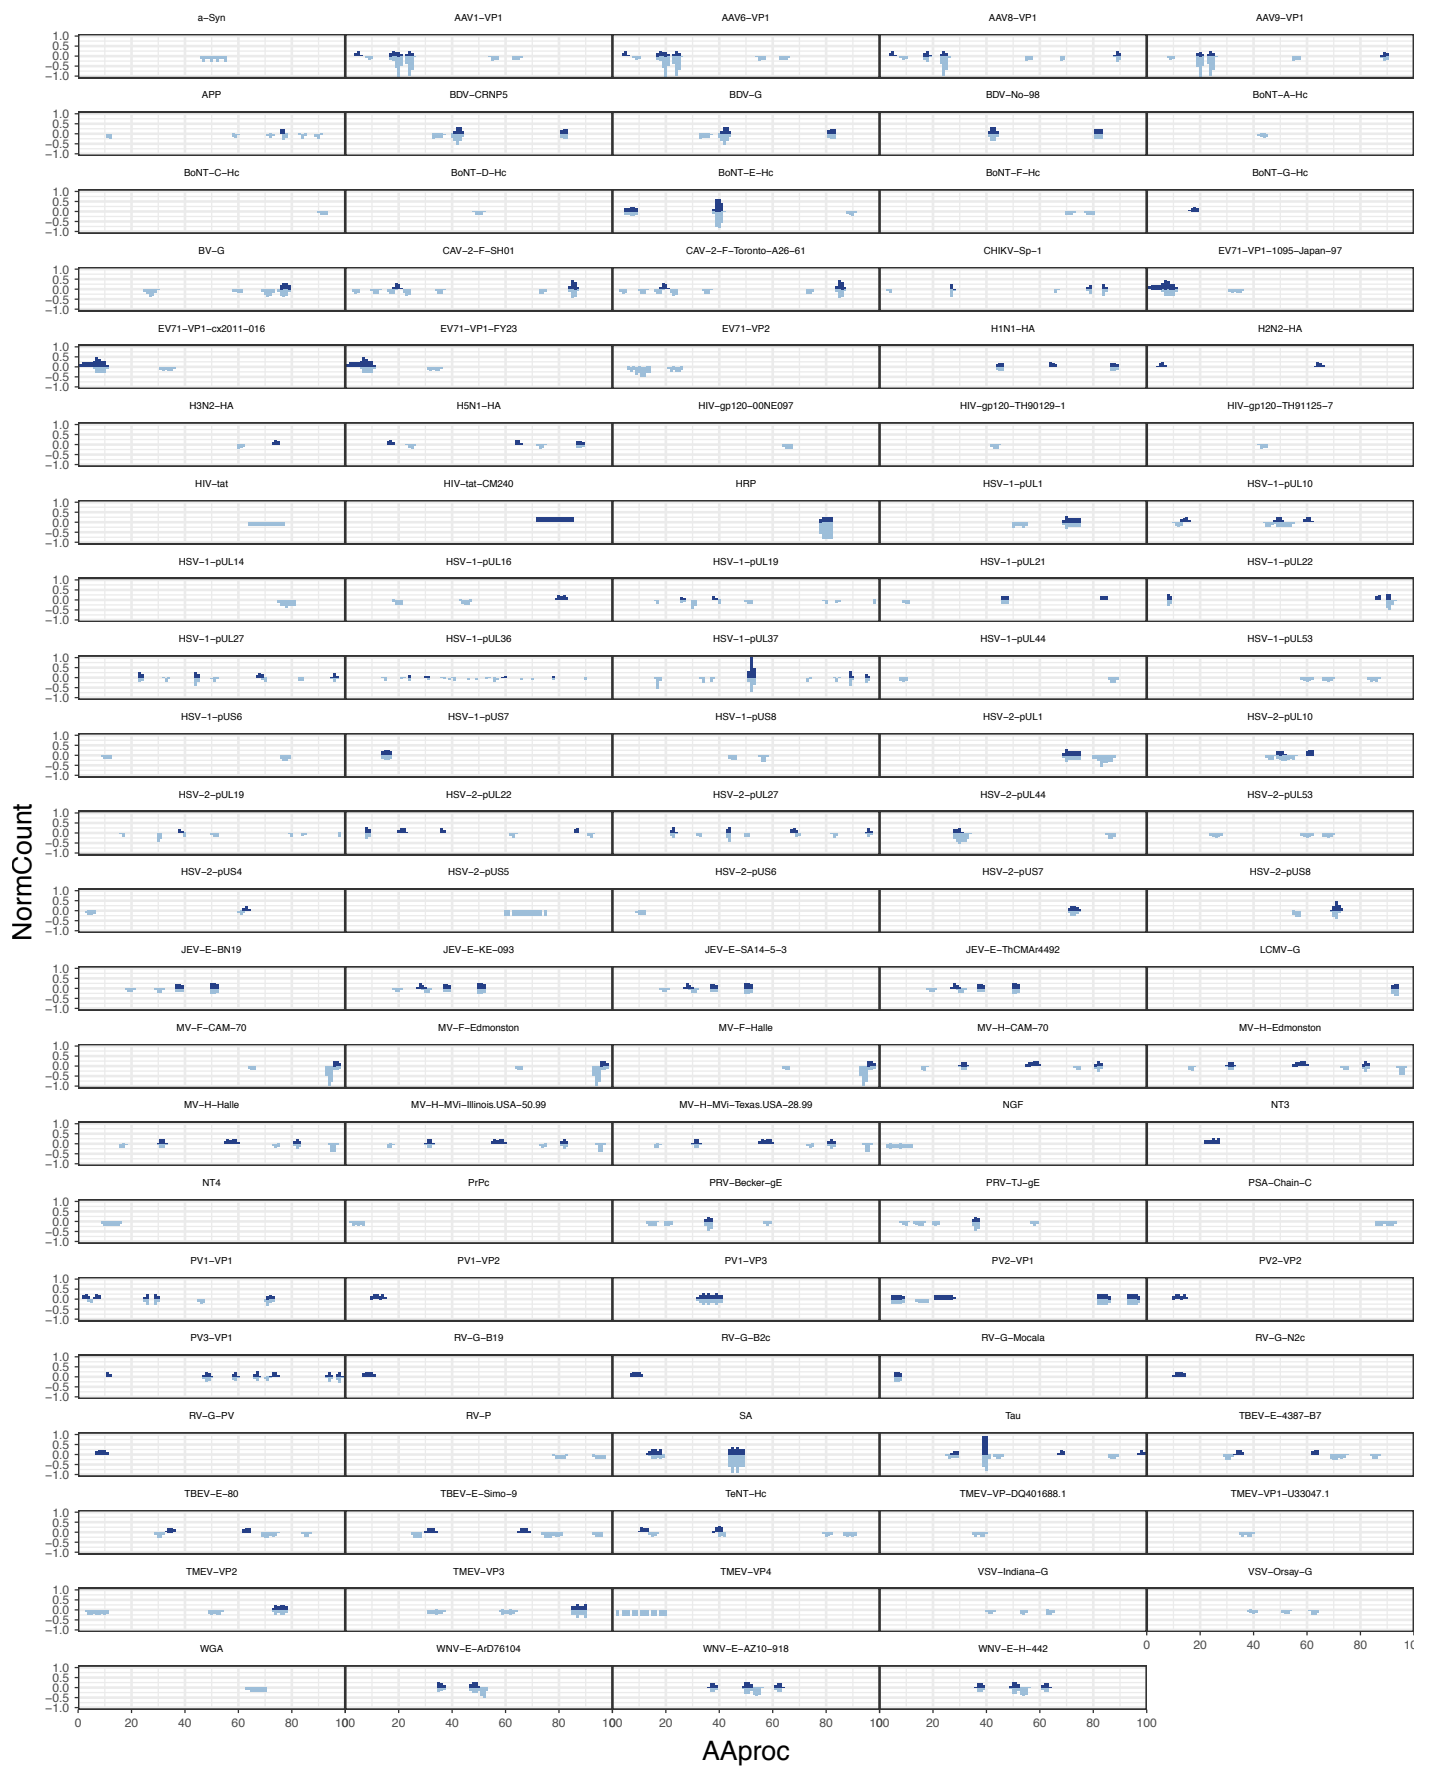

Library mRNA\_3cpc\_Ctx mRNA\_3cpc\_SN

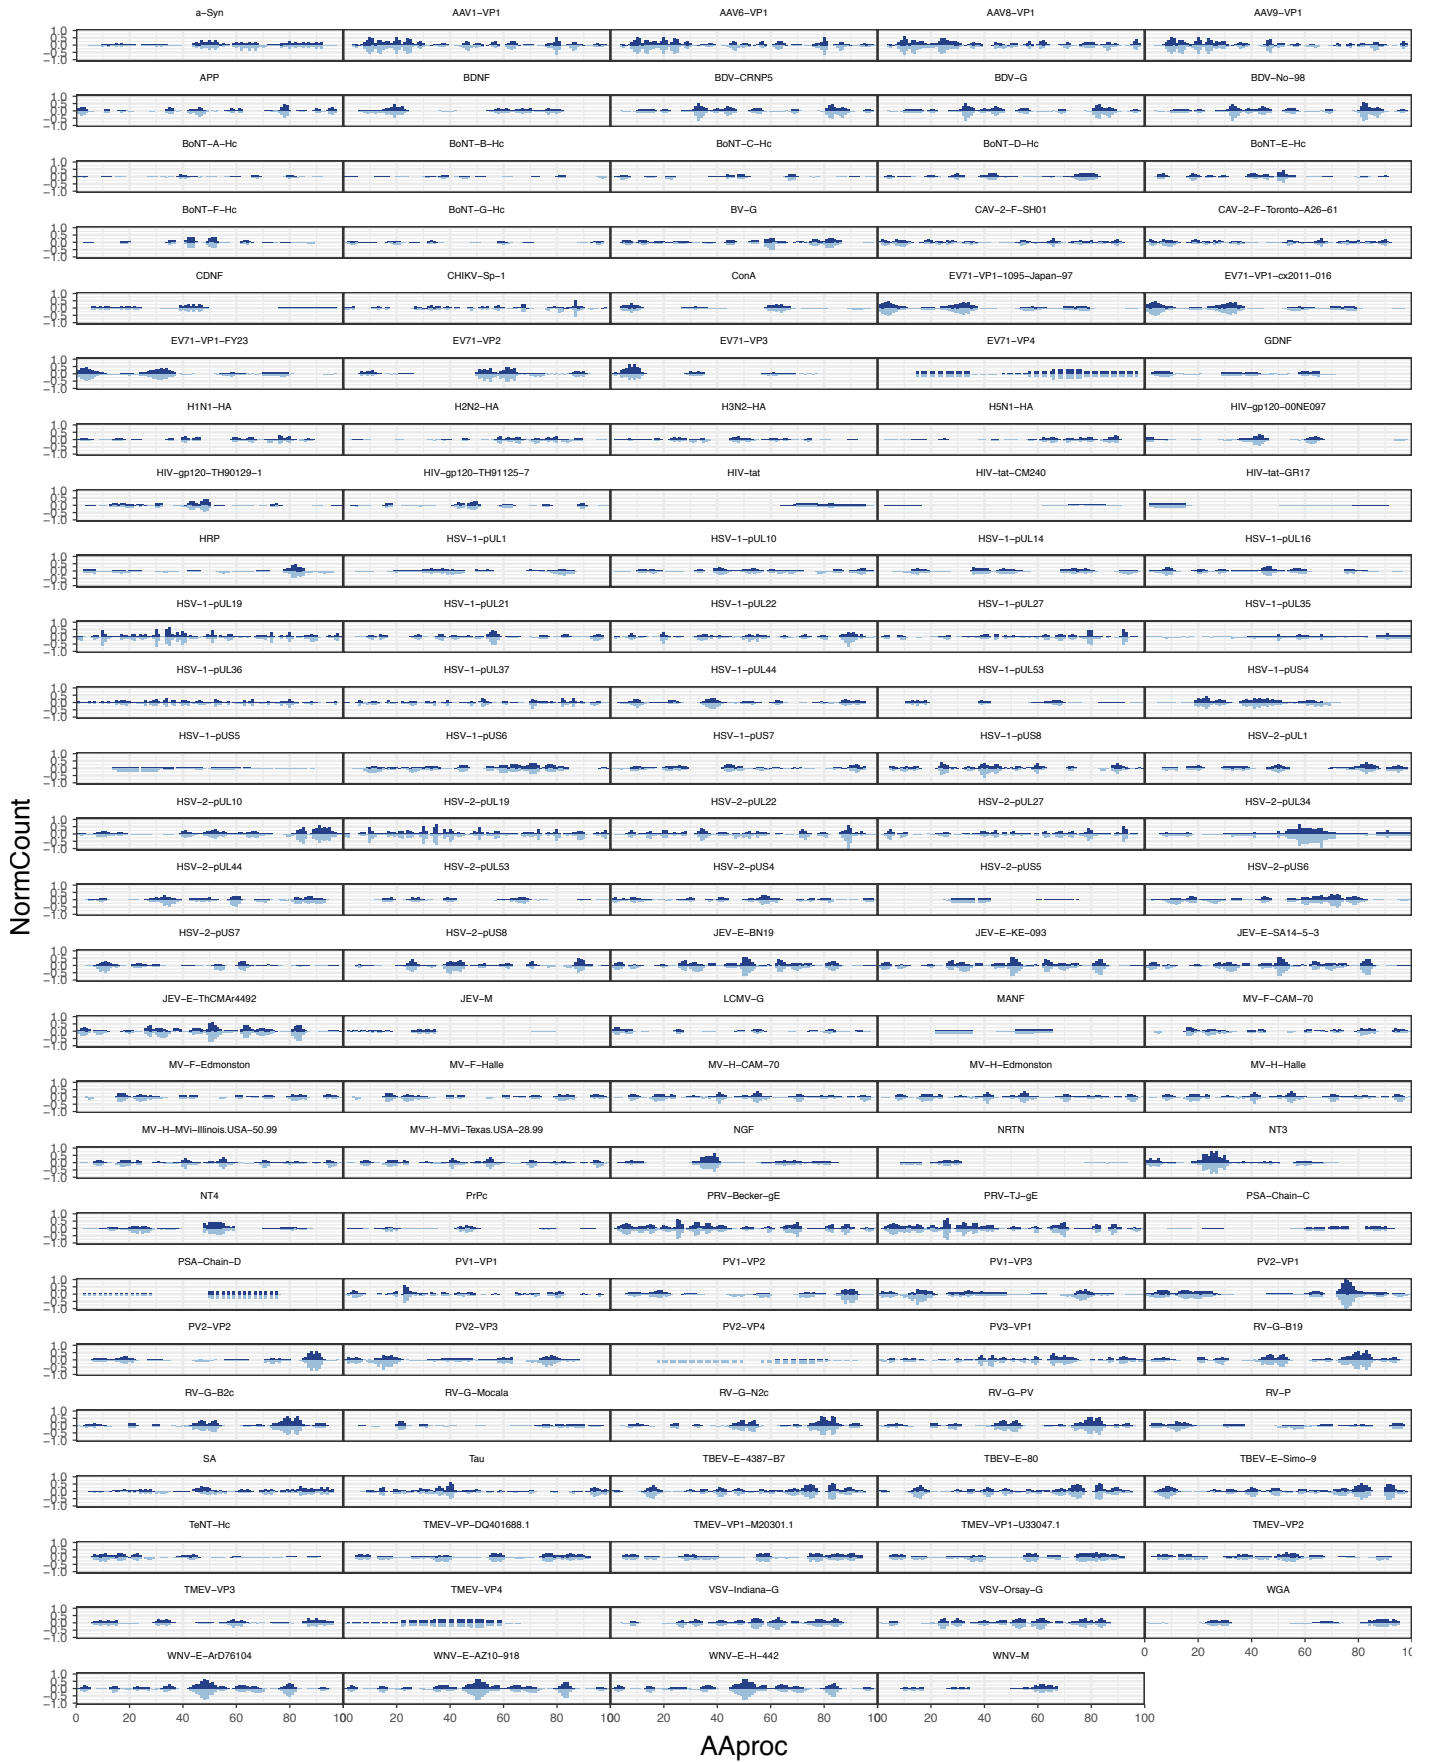

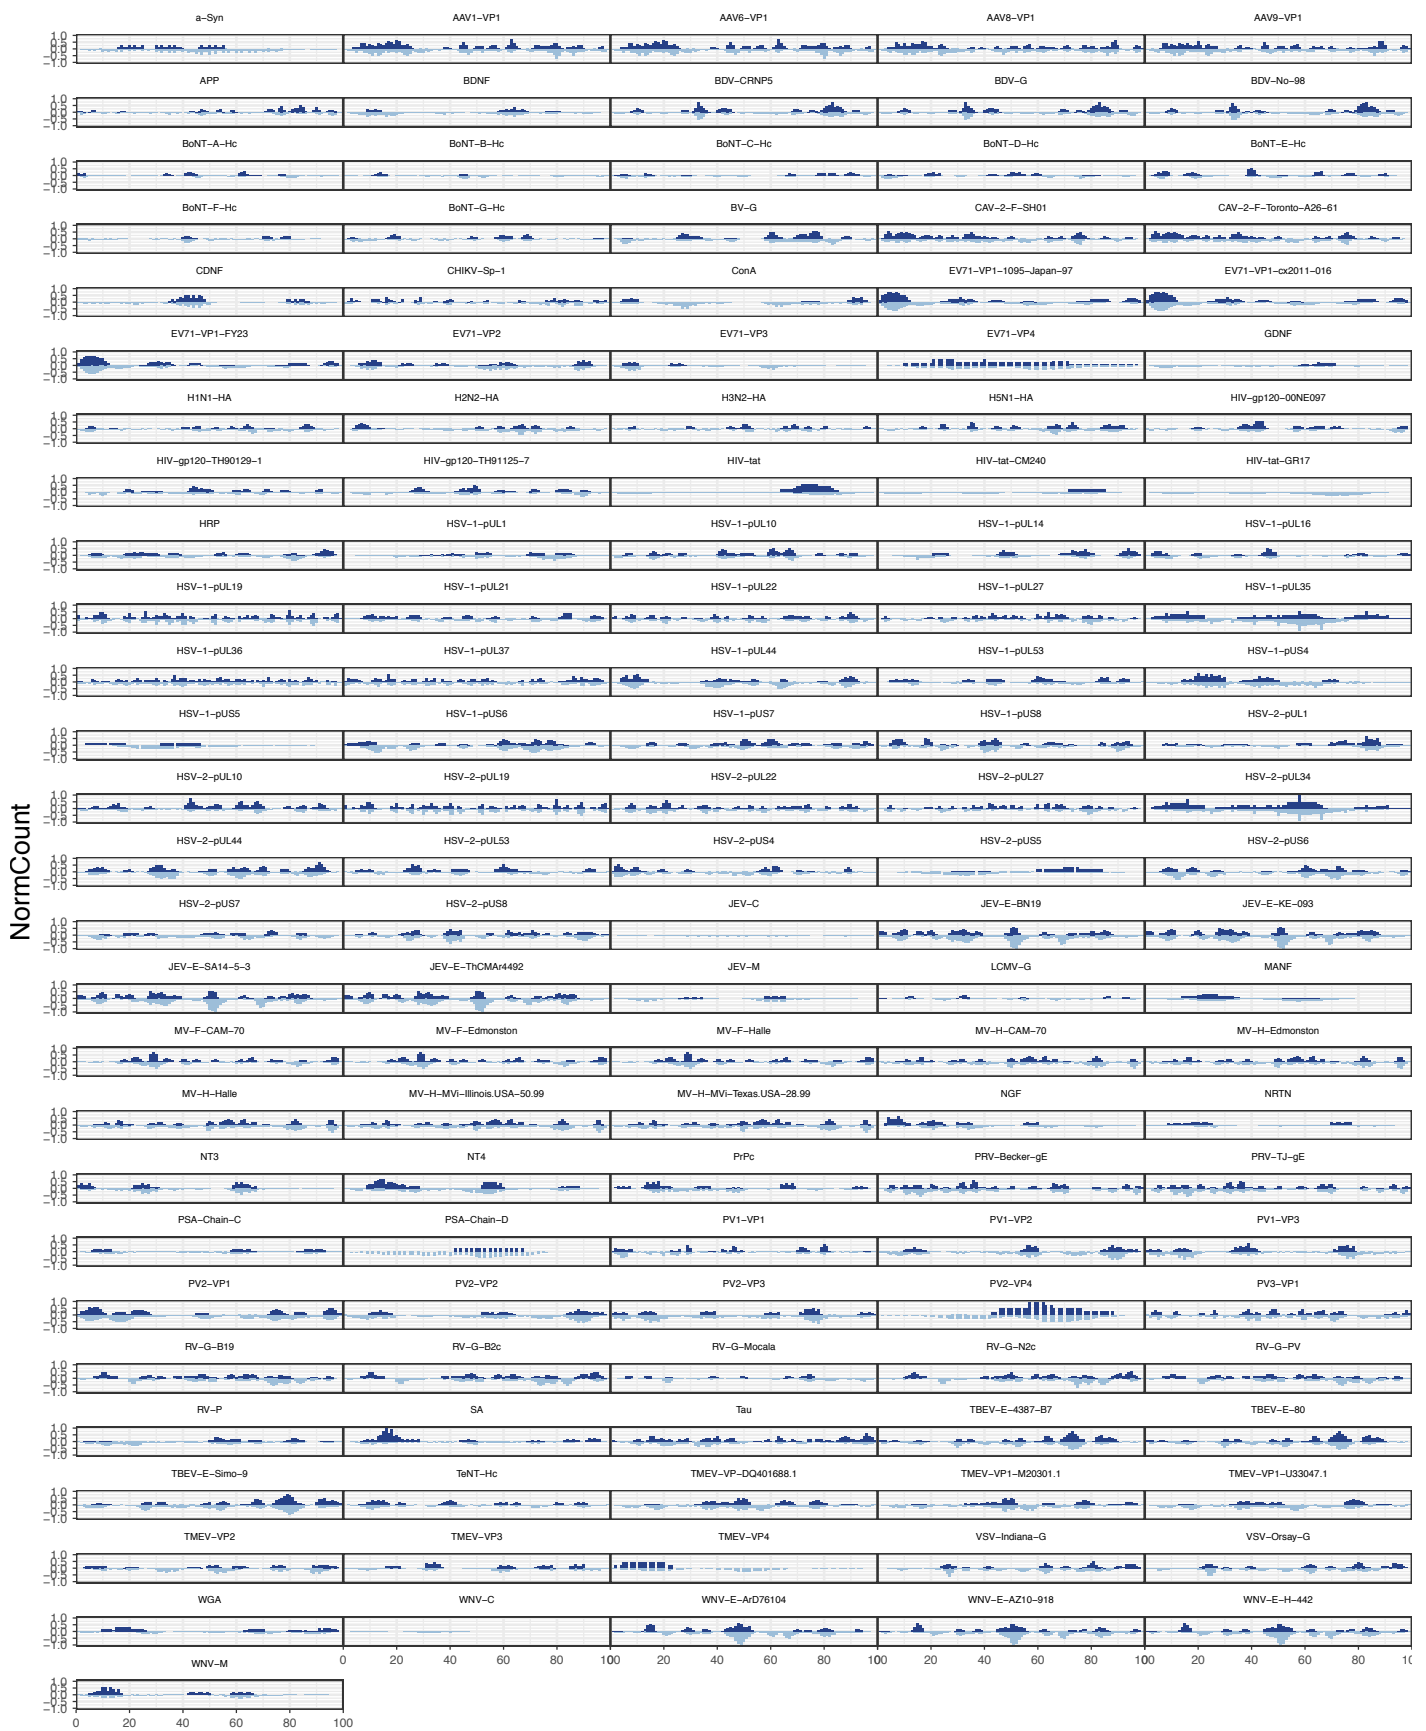

Aaproc

Library mRNA\_30cpc\_Str mRNA\_3cpc\_Str

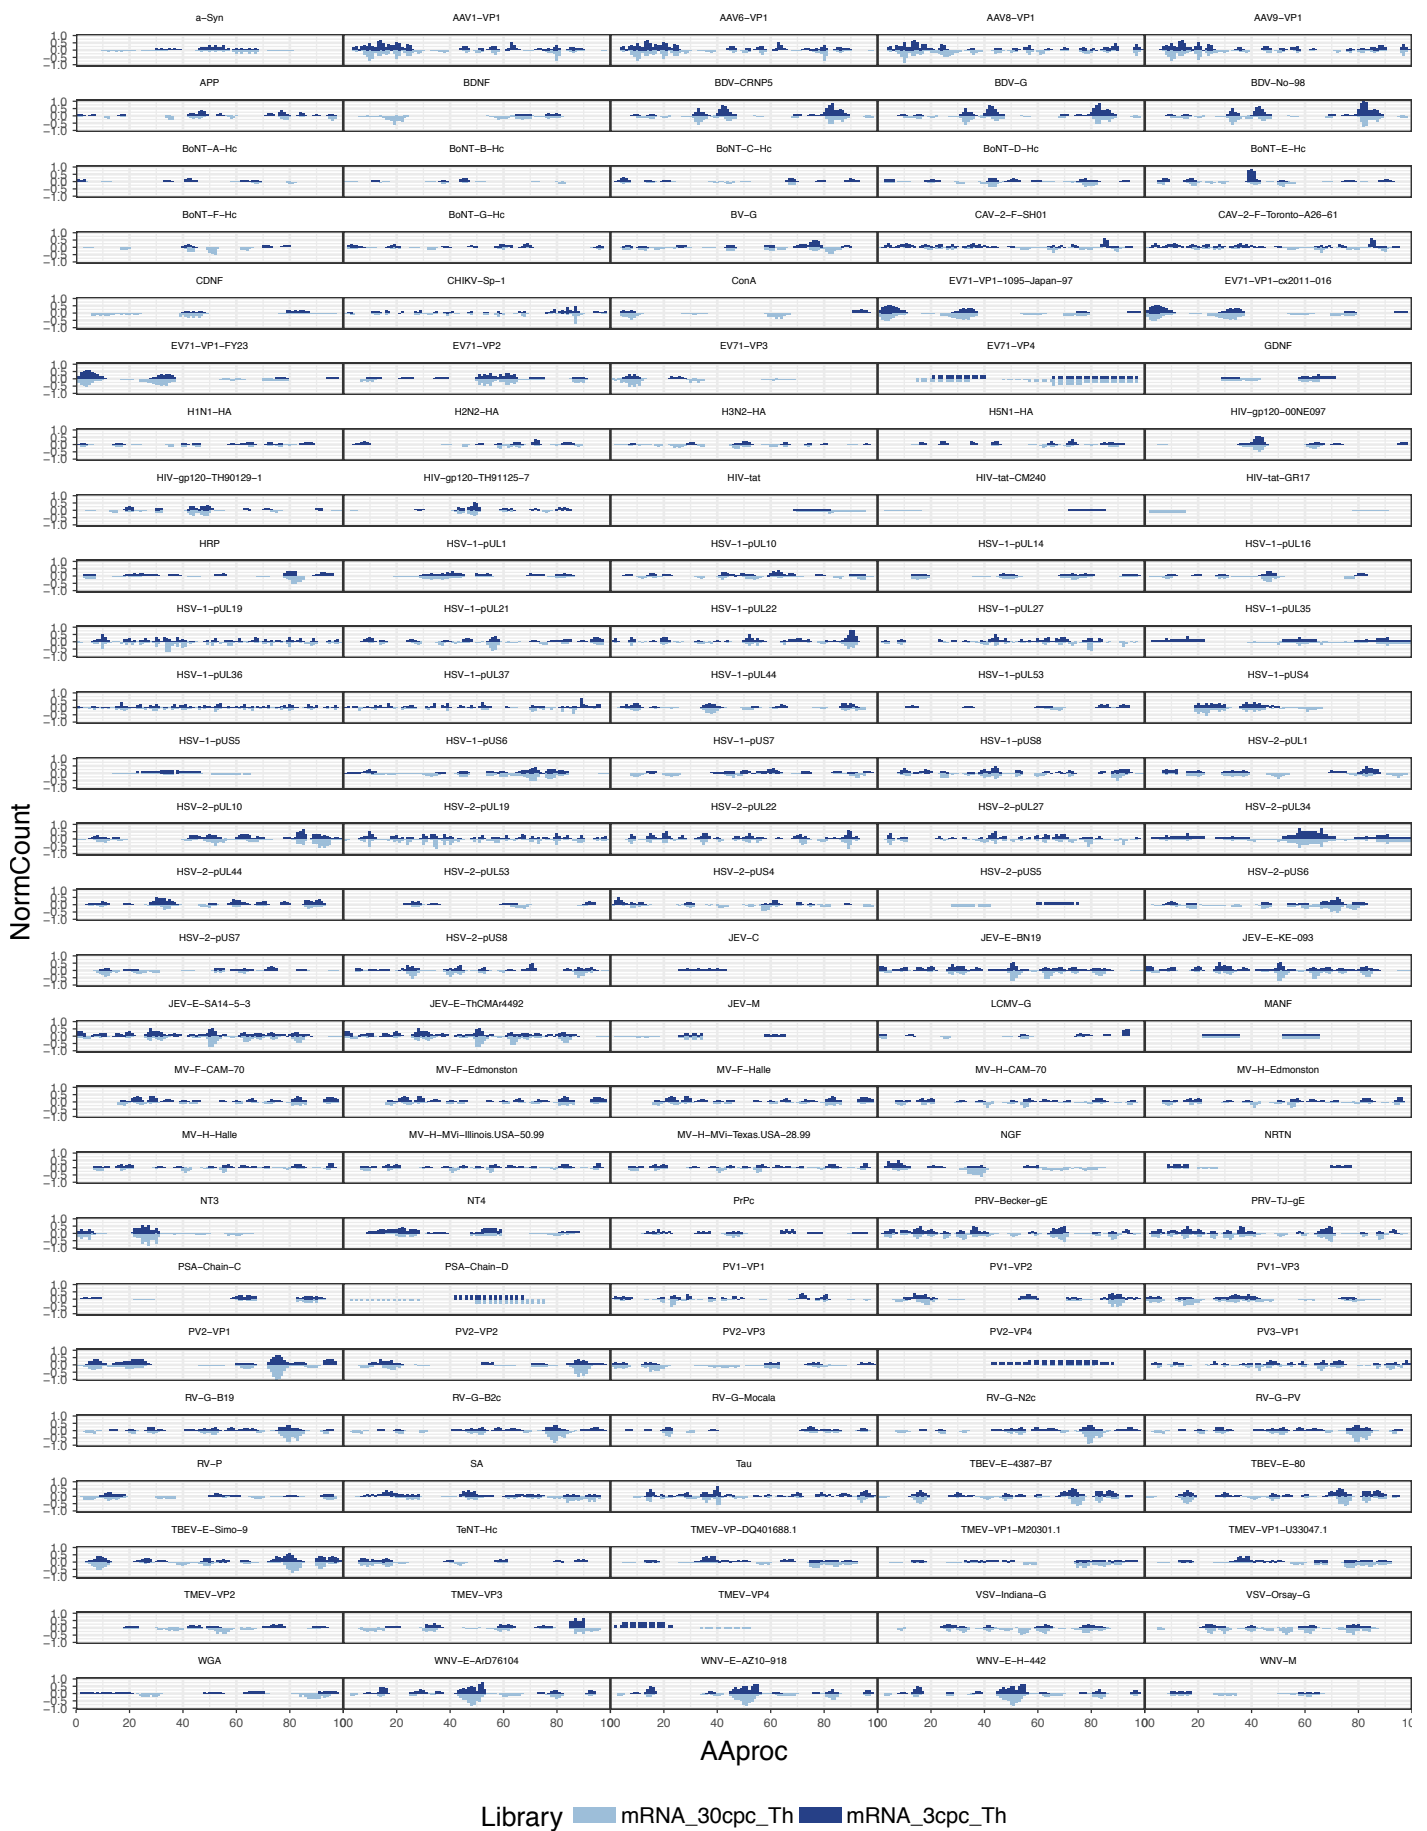



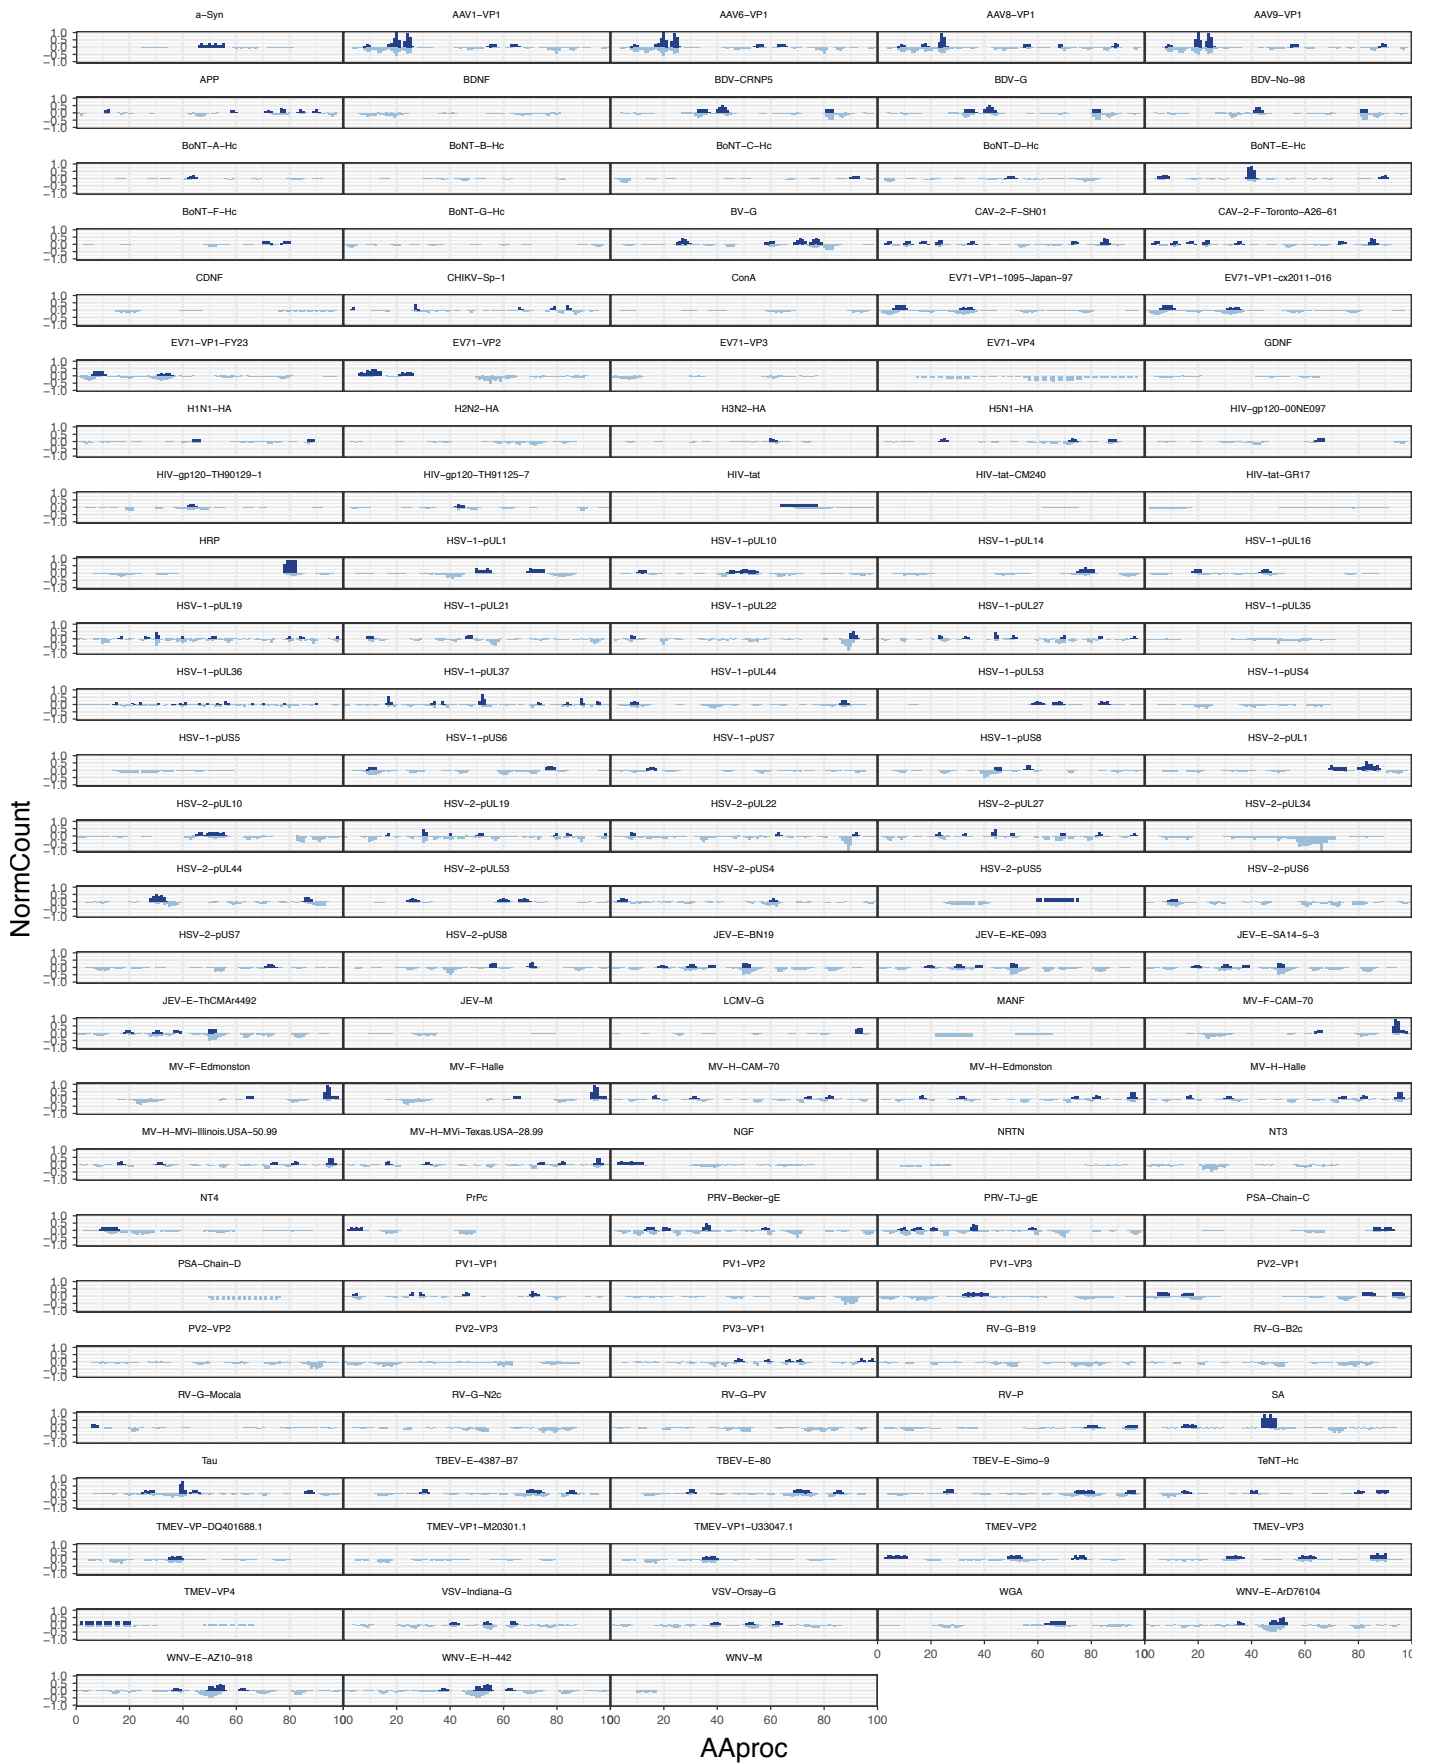

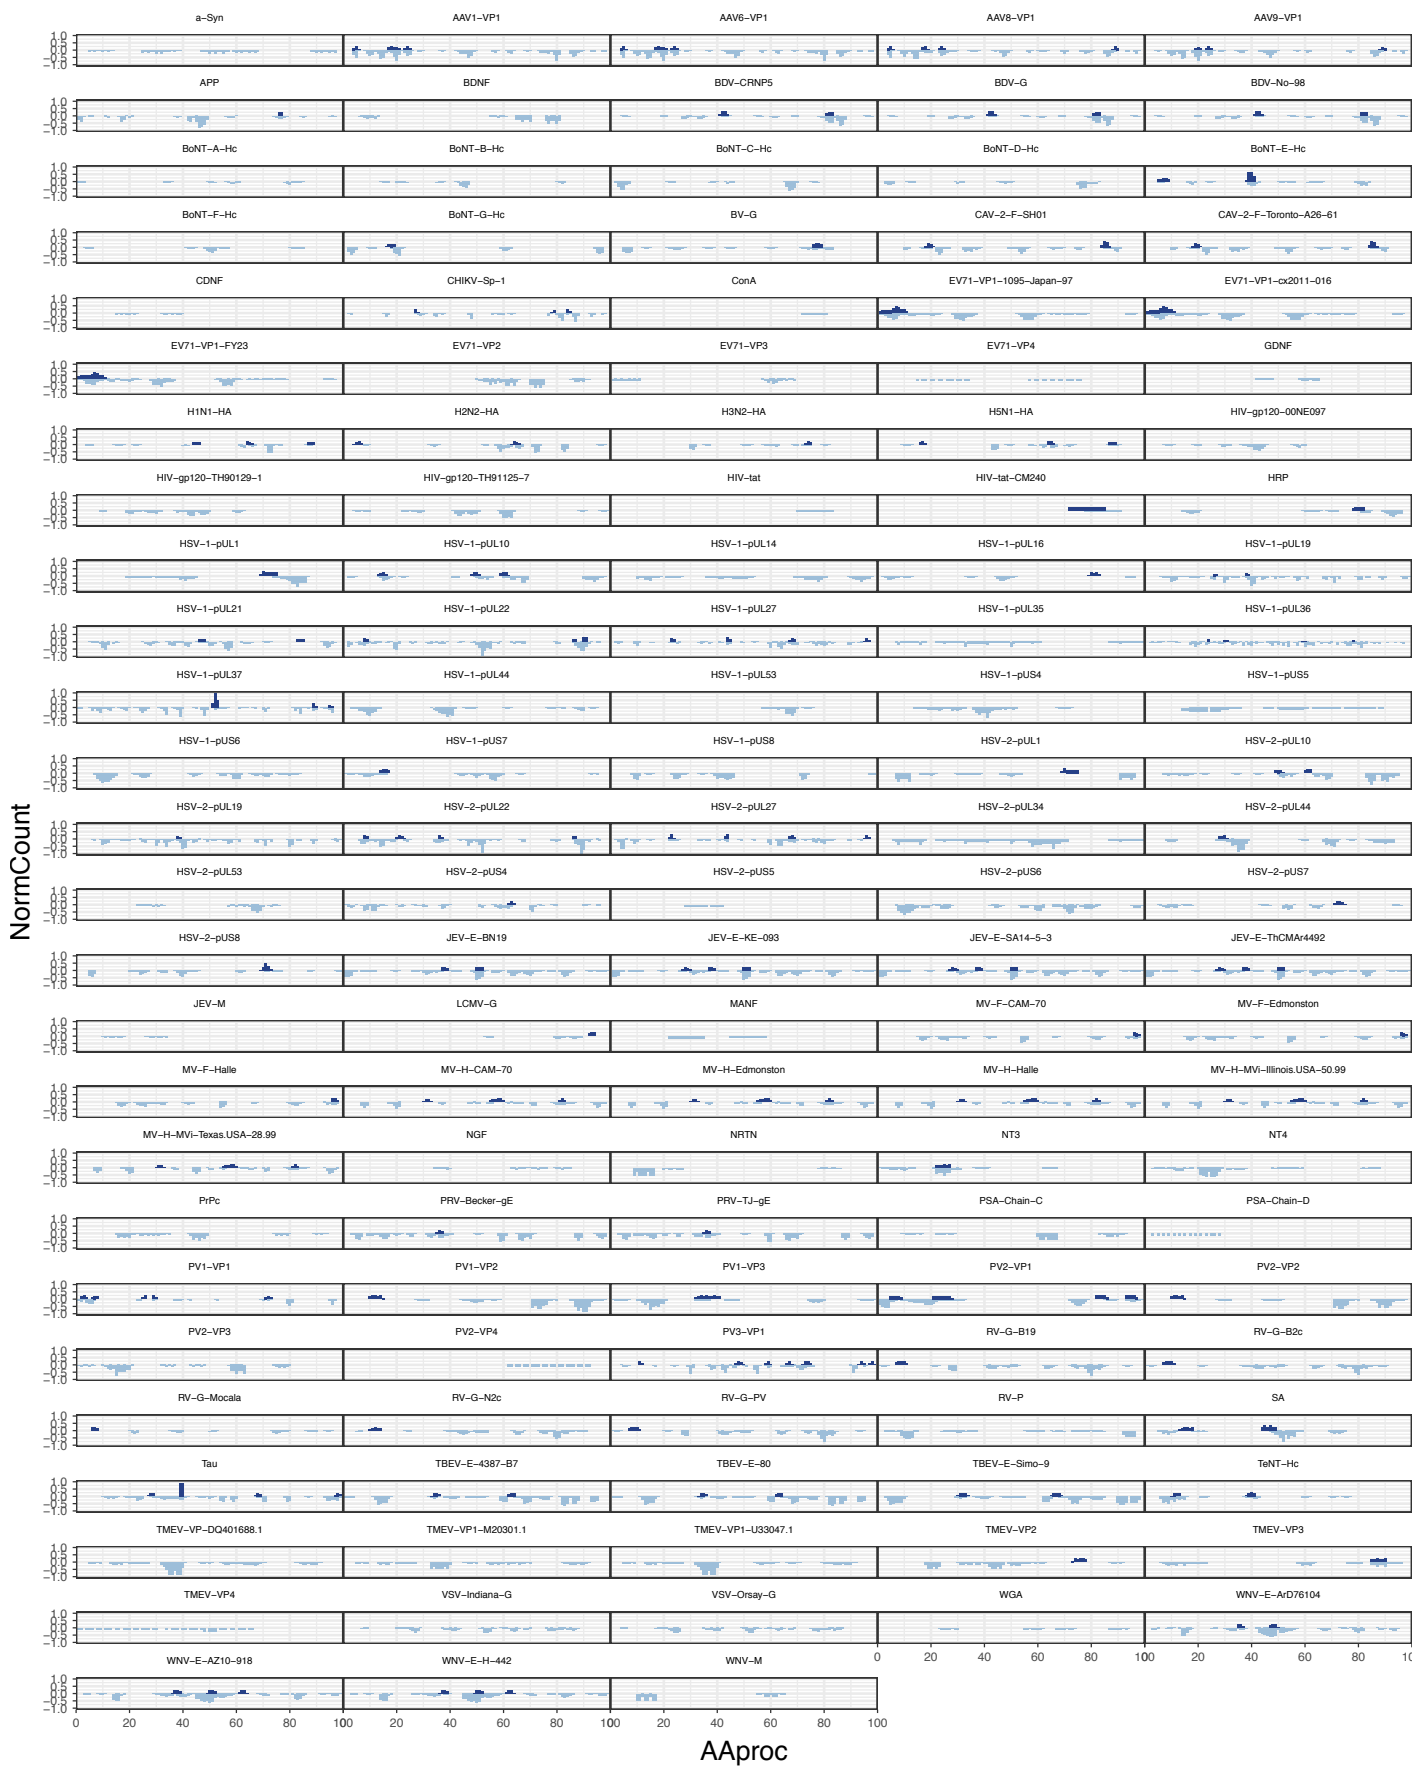

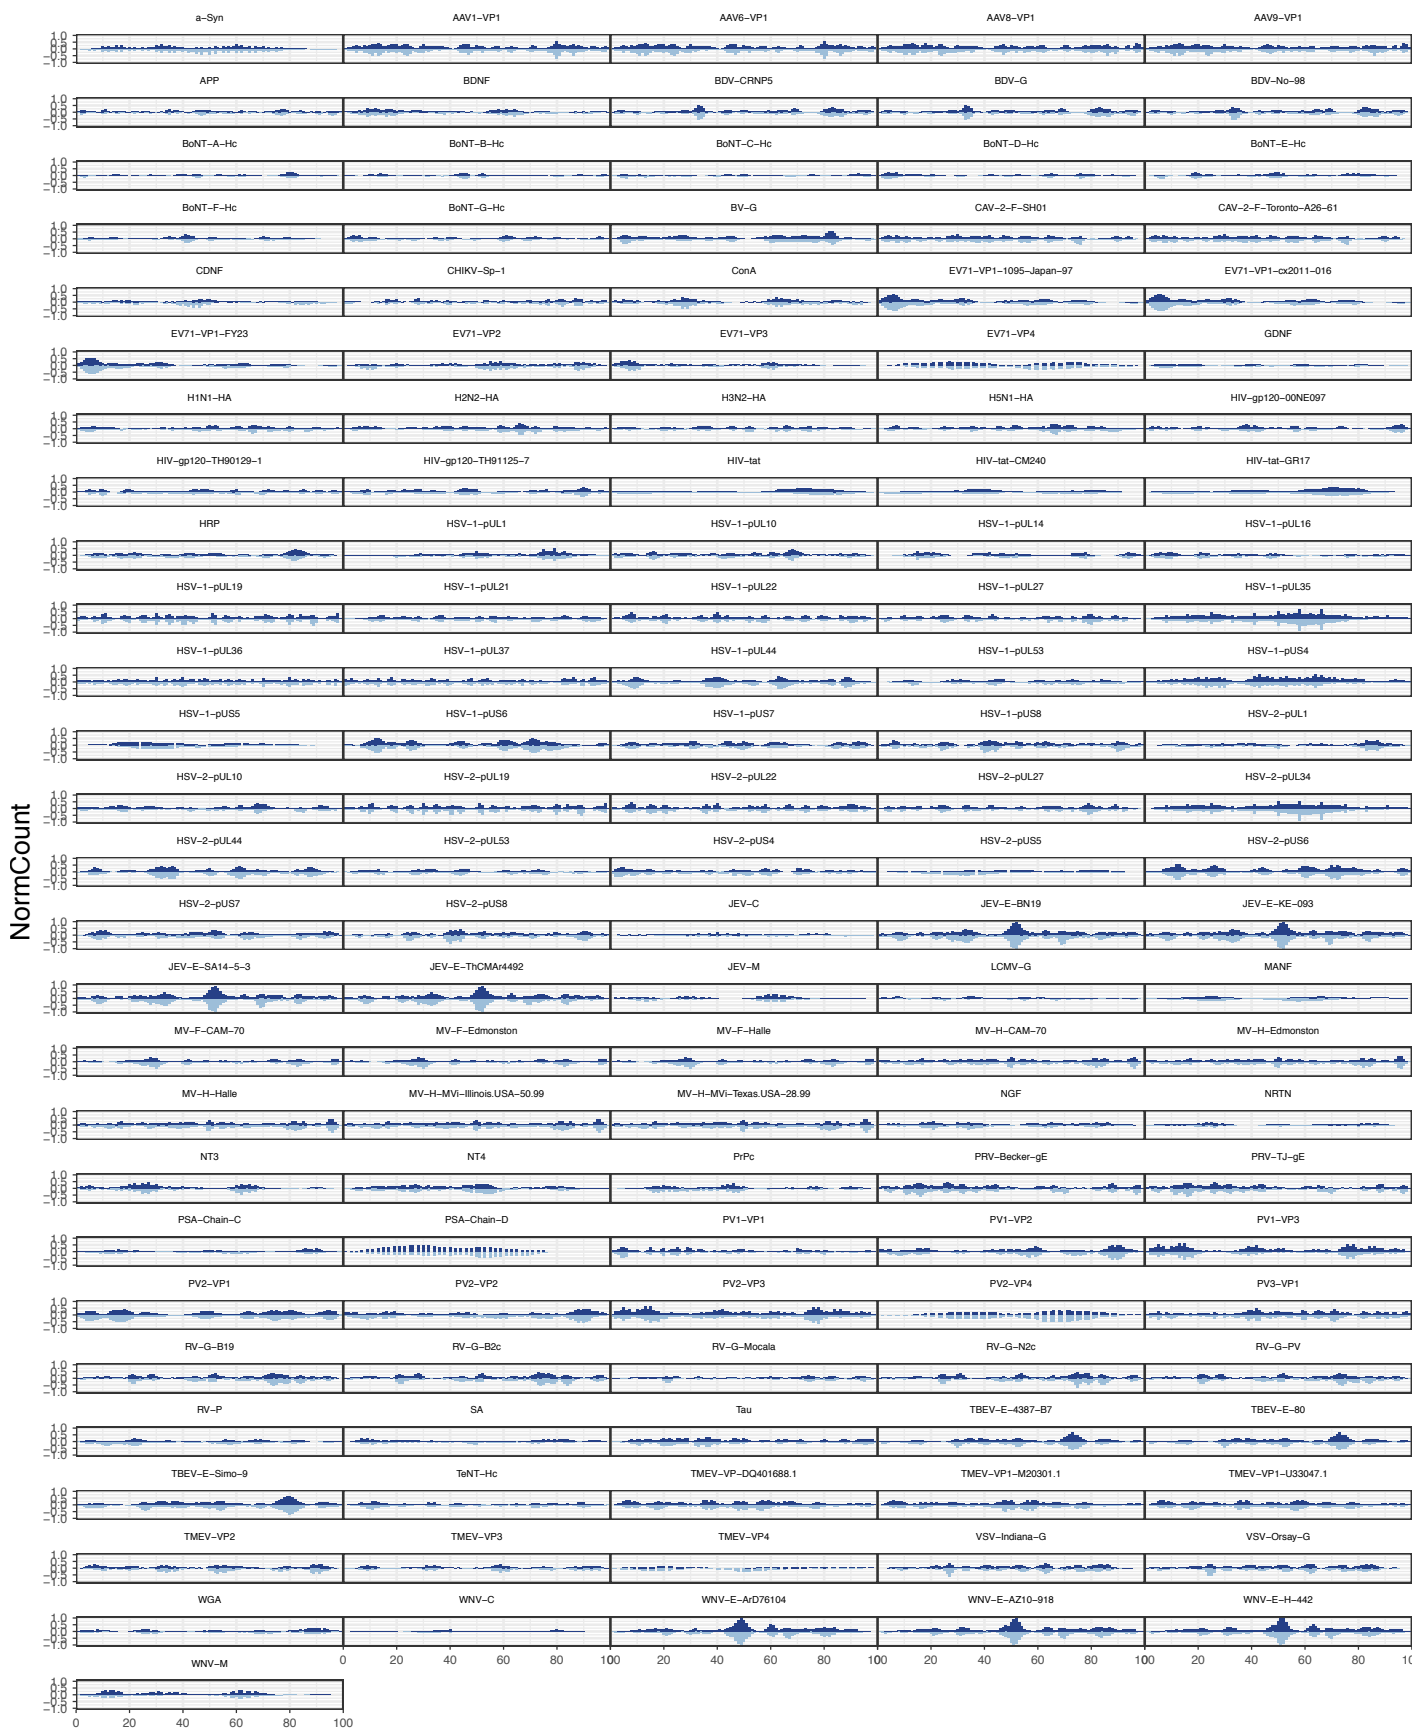

Aaproc

Library mRNA\_30cpc\_Str mRNA\_30cpc\_Str\_4wks

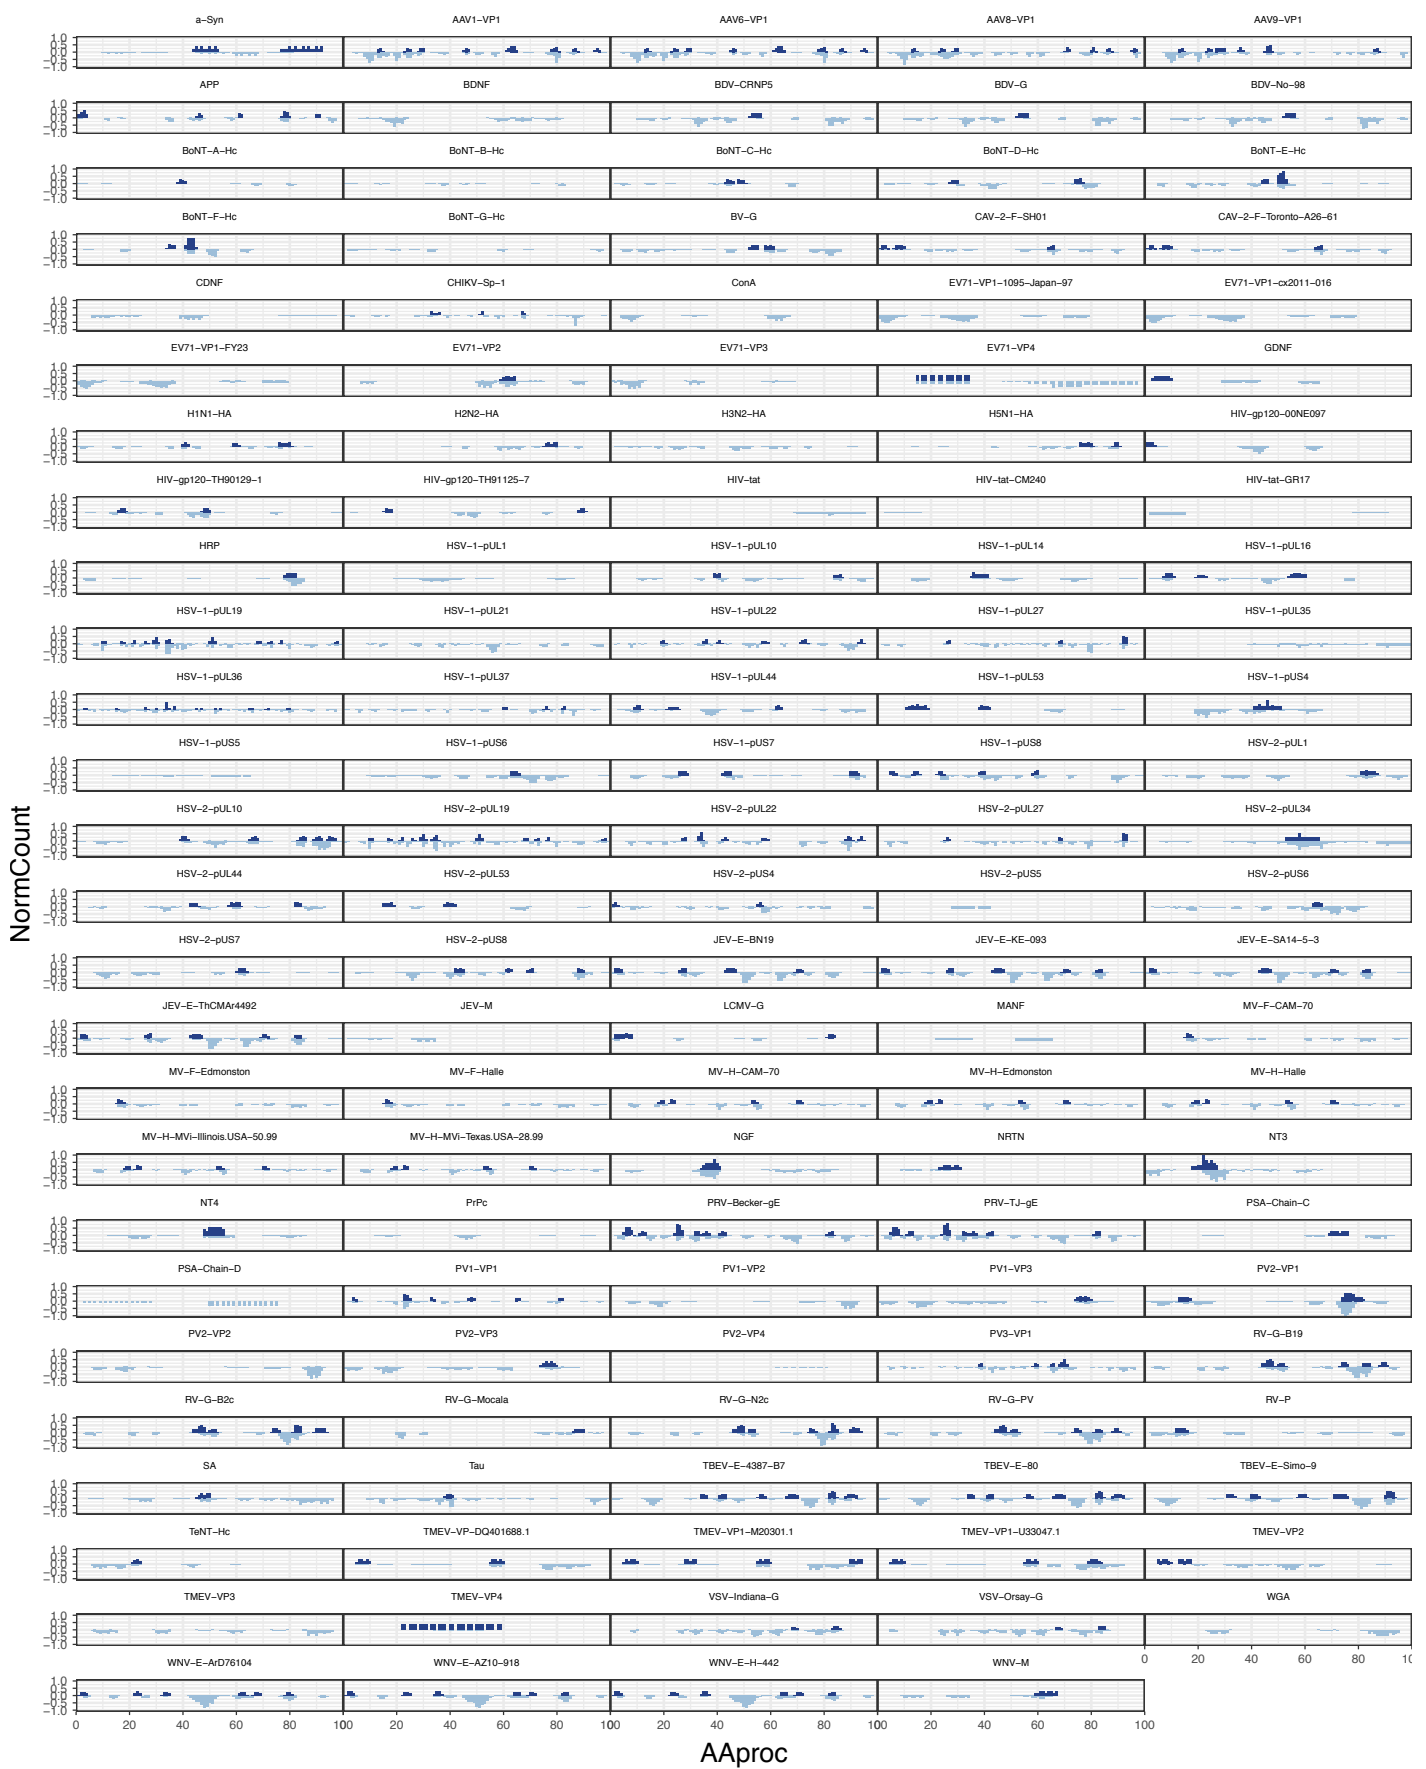

Library ■ mRNA\_30cpc\_Th ■ mRNA\_30cpc\_Th\_4wks

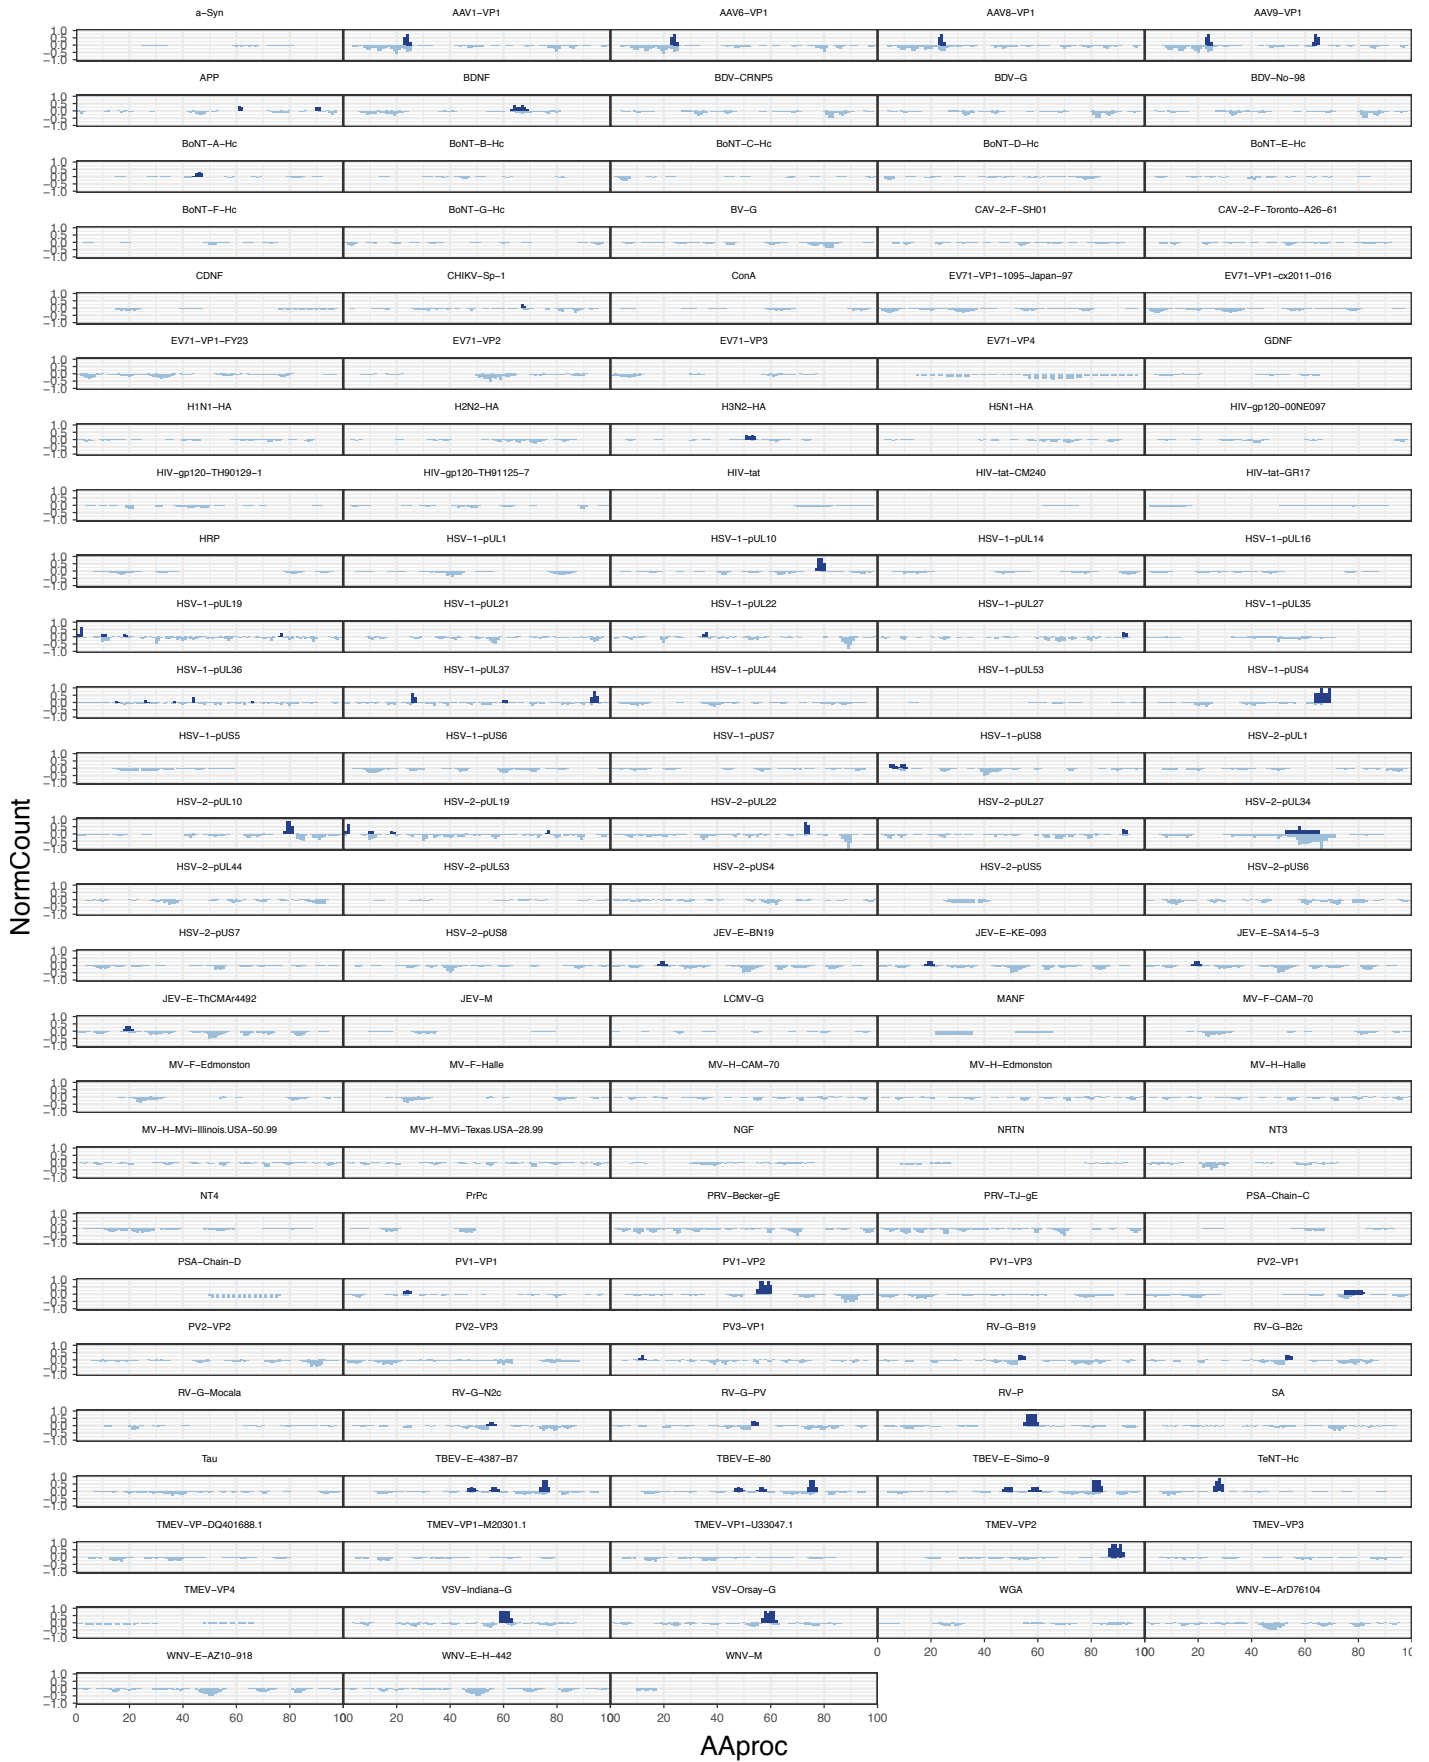

Library ■ mRNA\_30cpc\_Ctx ■ mRNA\_30cpc\_Ctx\_4wks

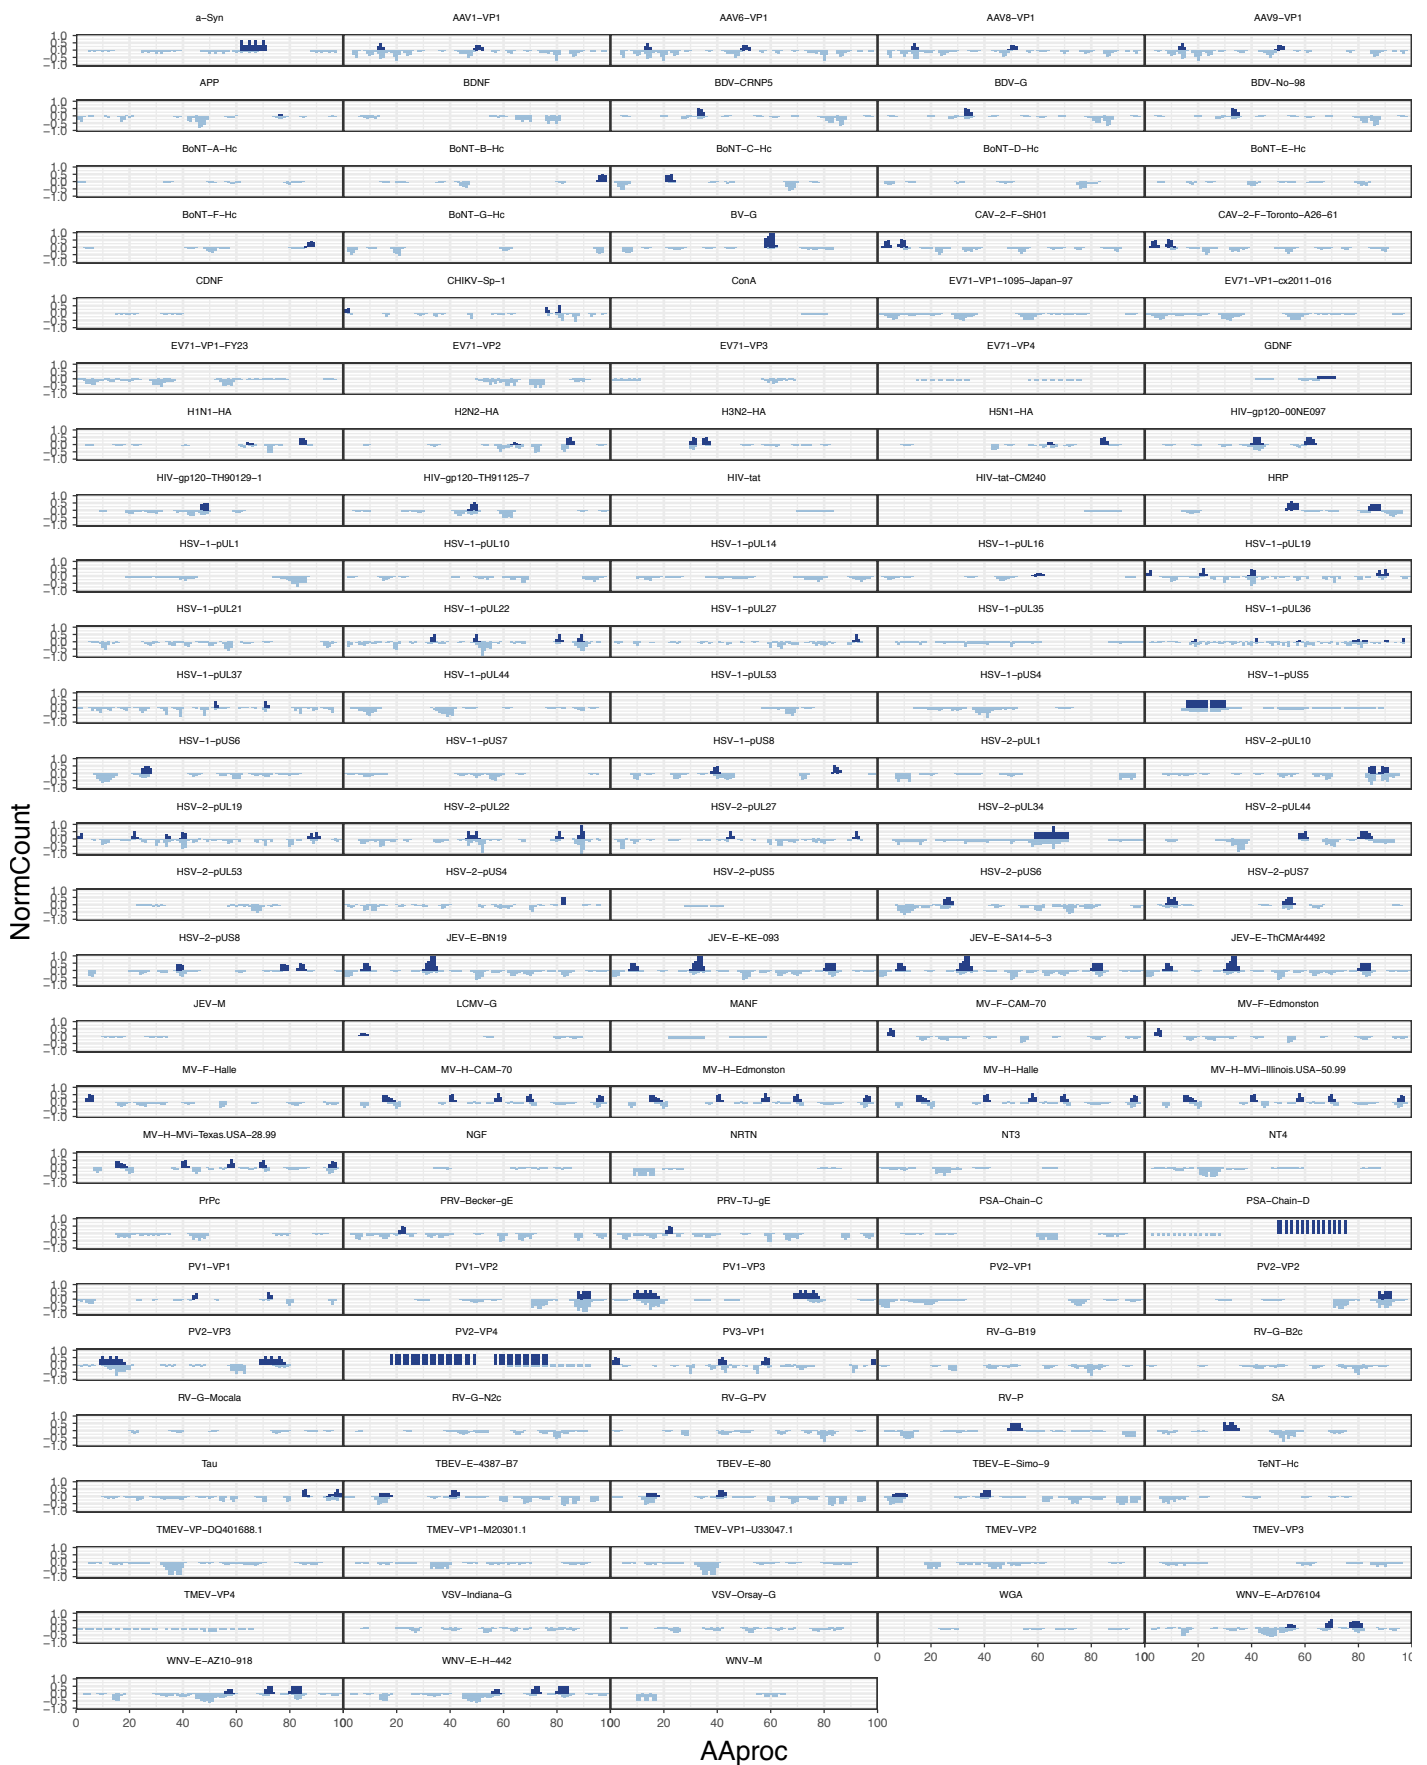

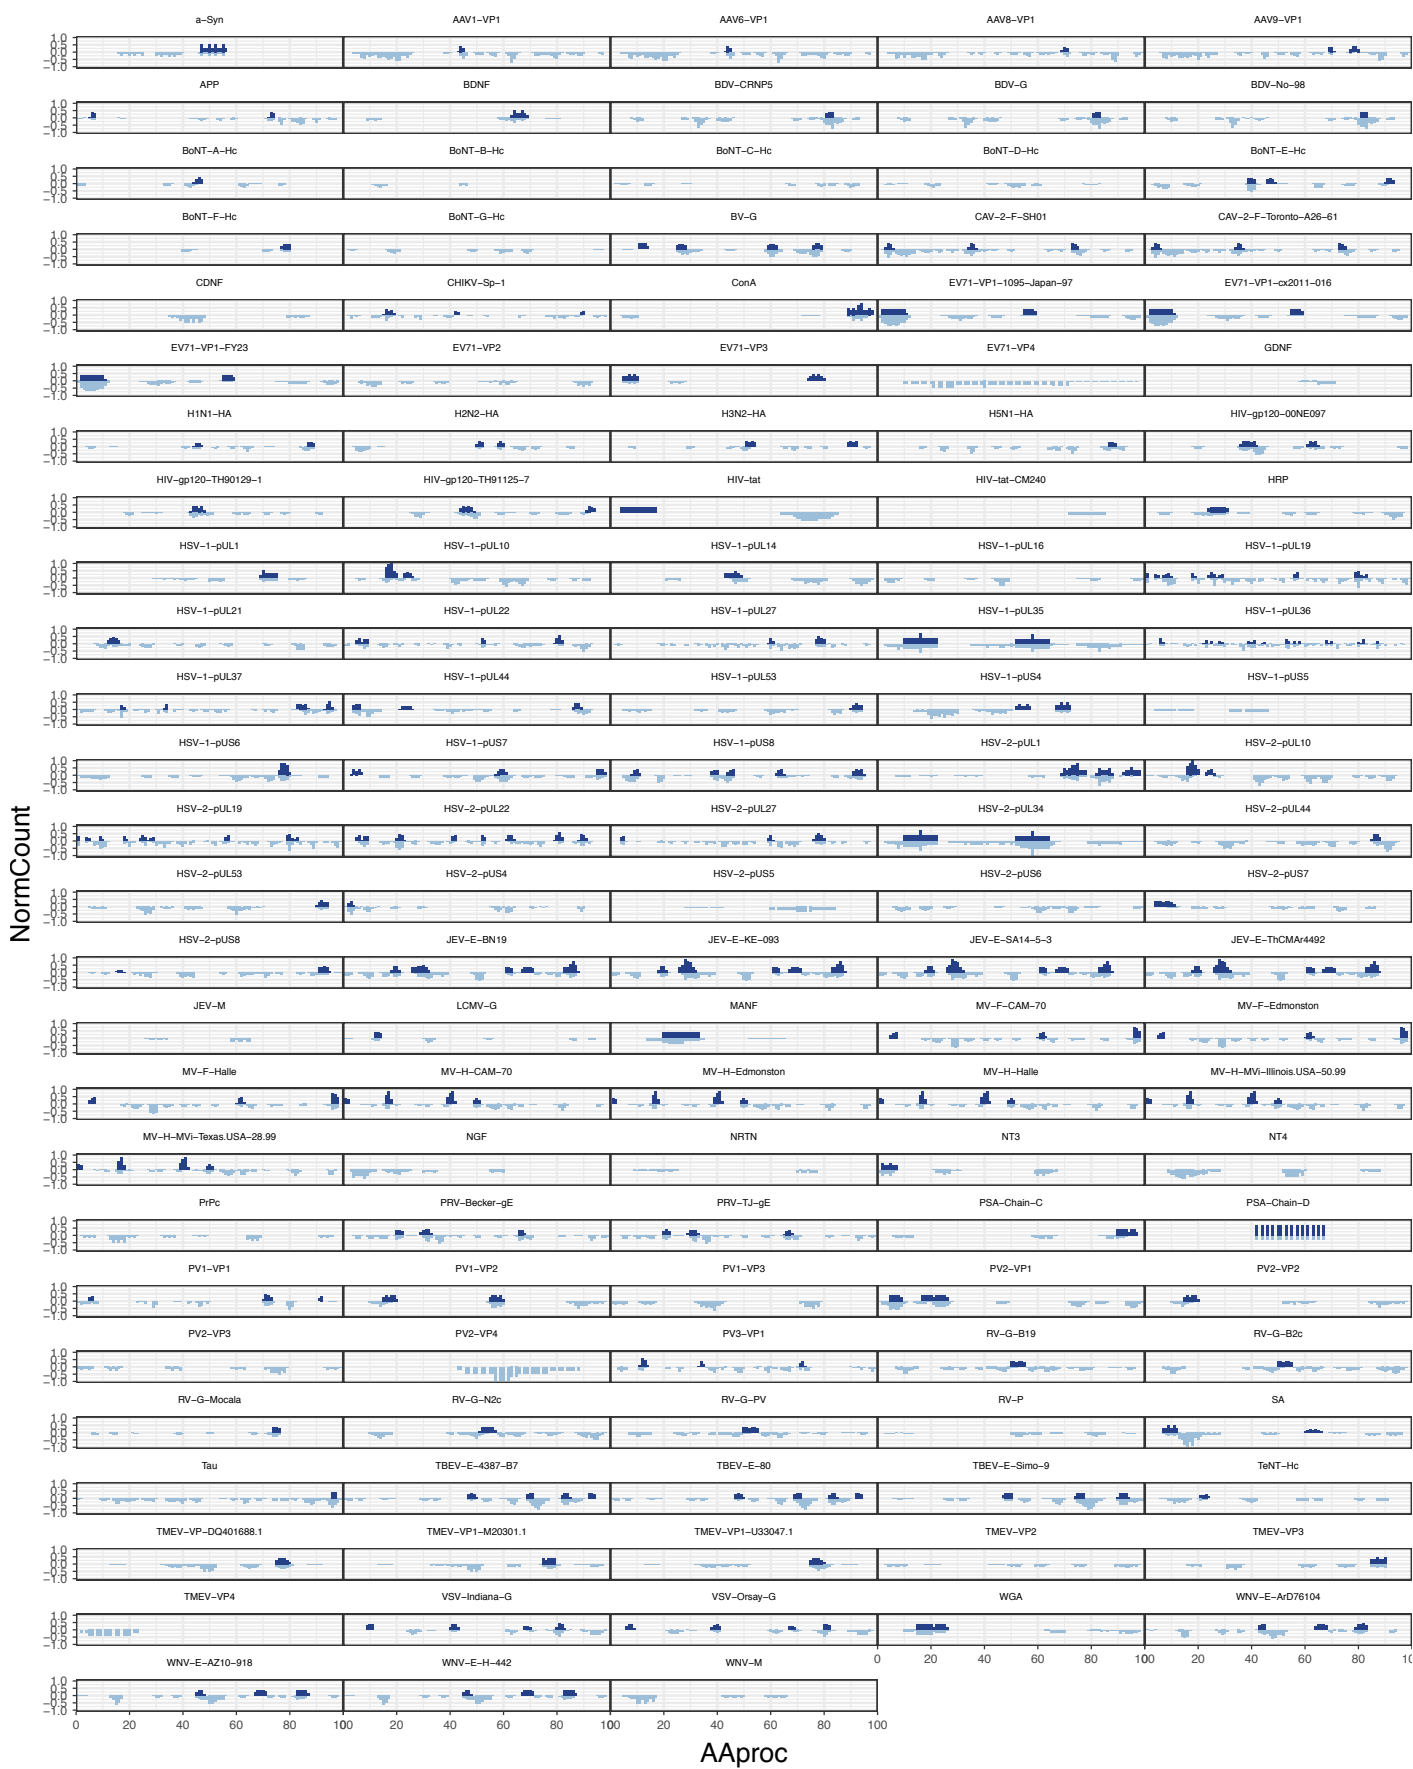

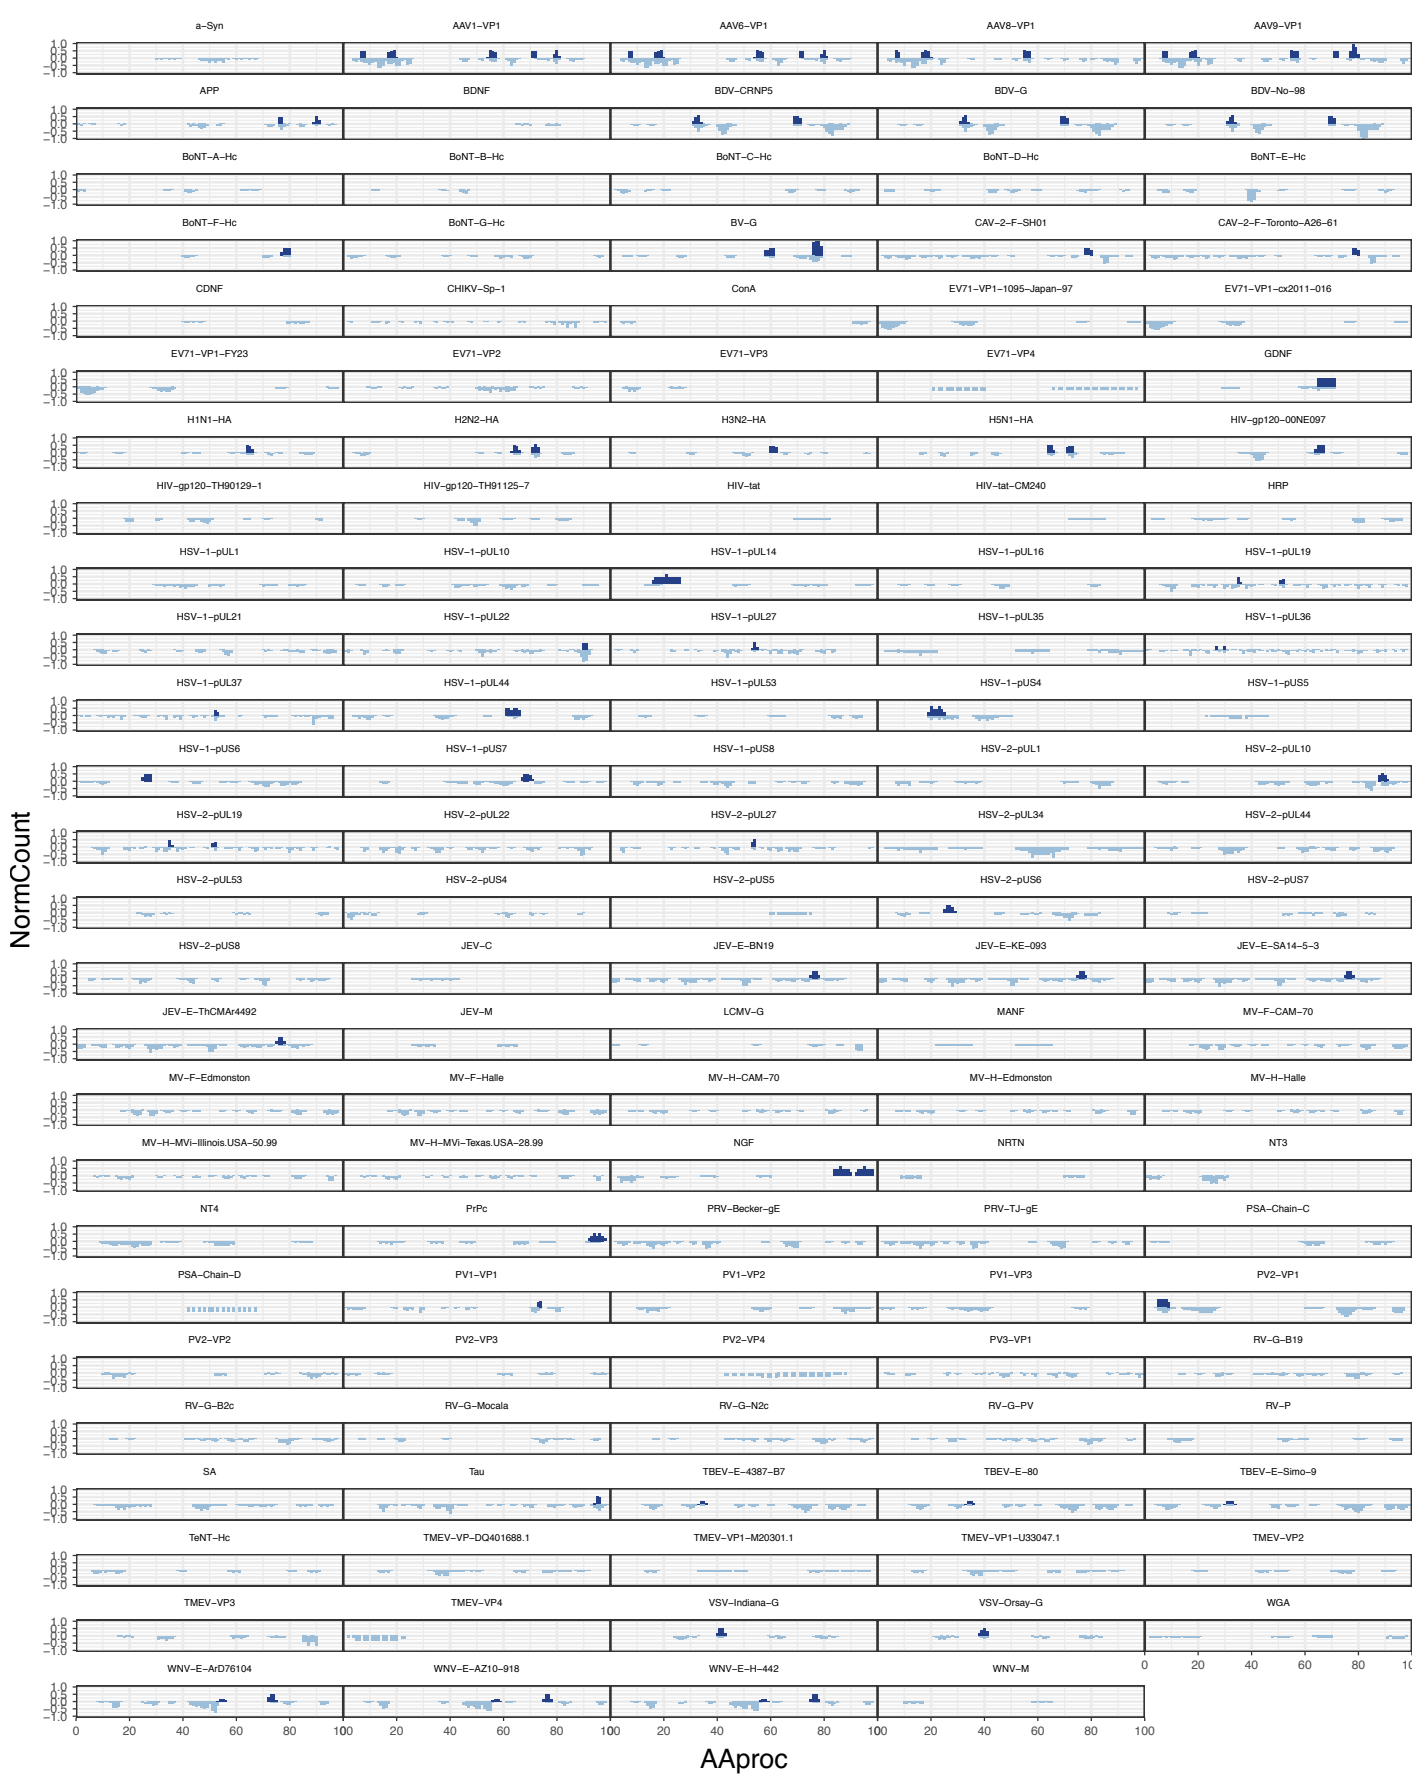

Library ■ mRNA\_3cpc\_Th ■ mRNA\_3cpc\_Th\_4wks



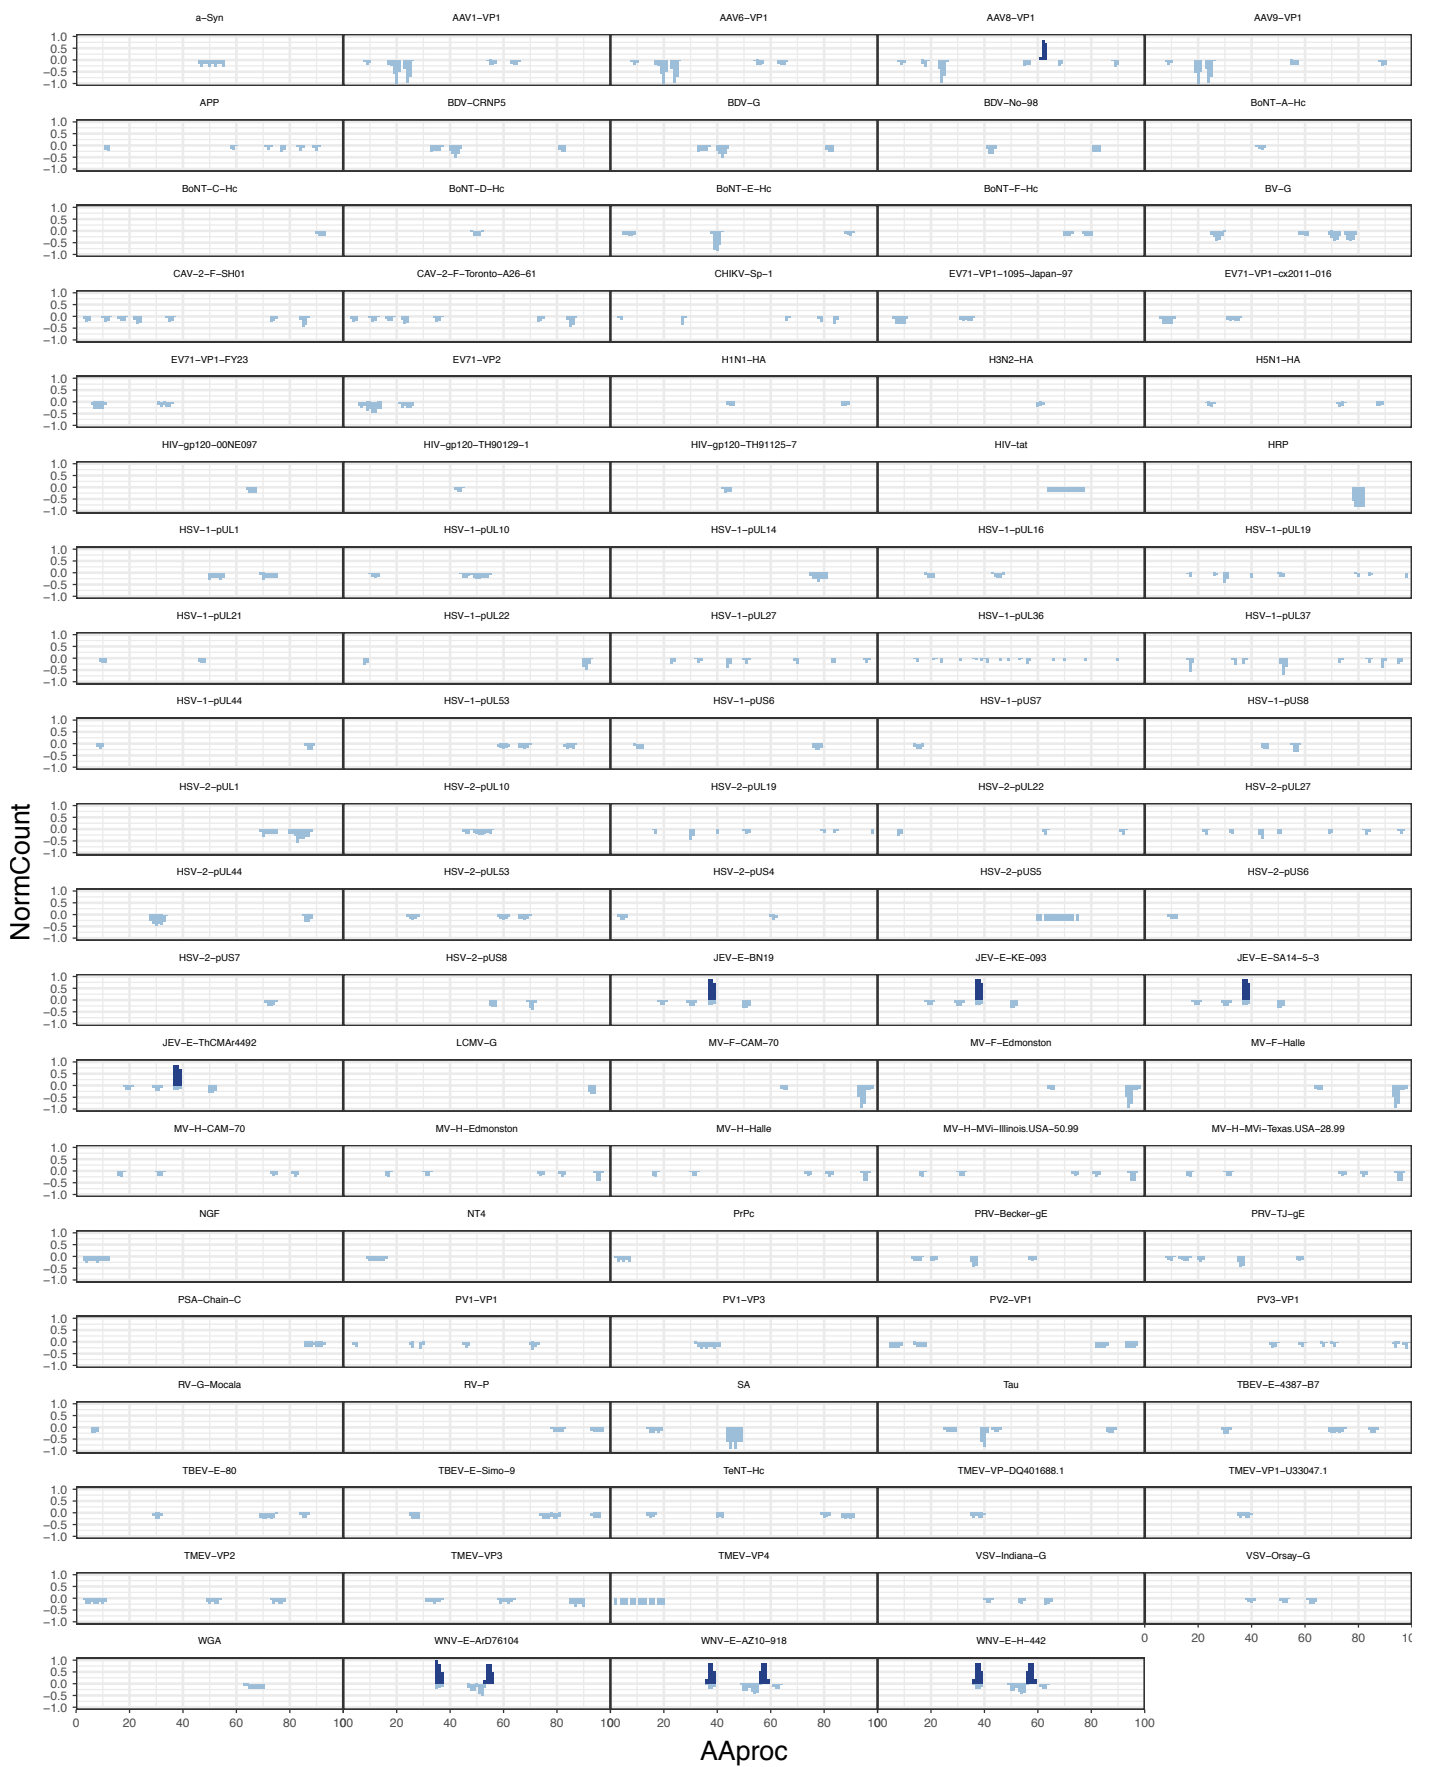

Library mRNA\_3cpc\_Ctx mRNA\_3cpc\_Ctx\_4wks

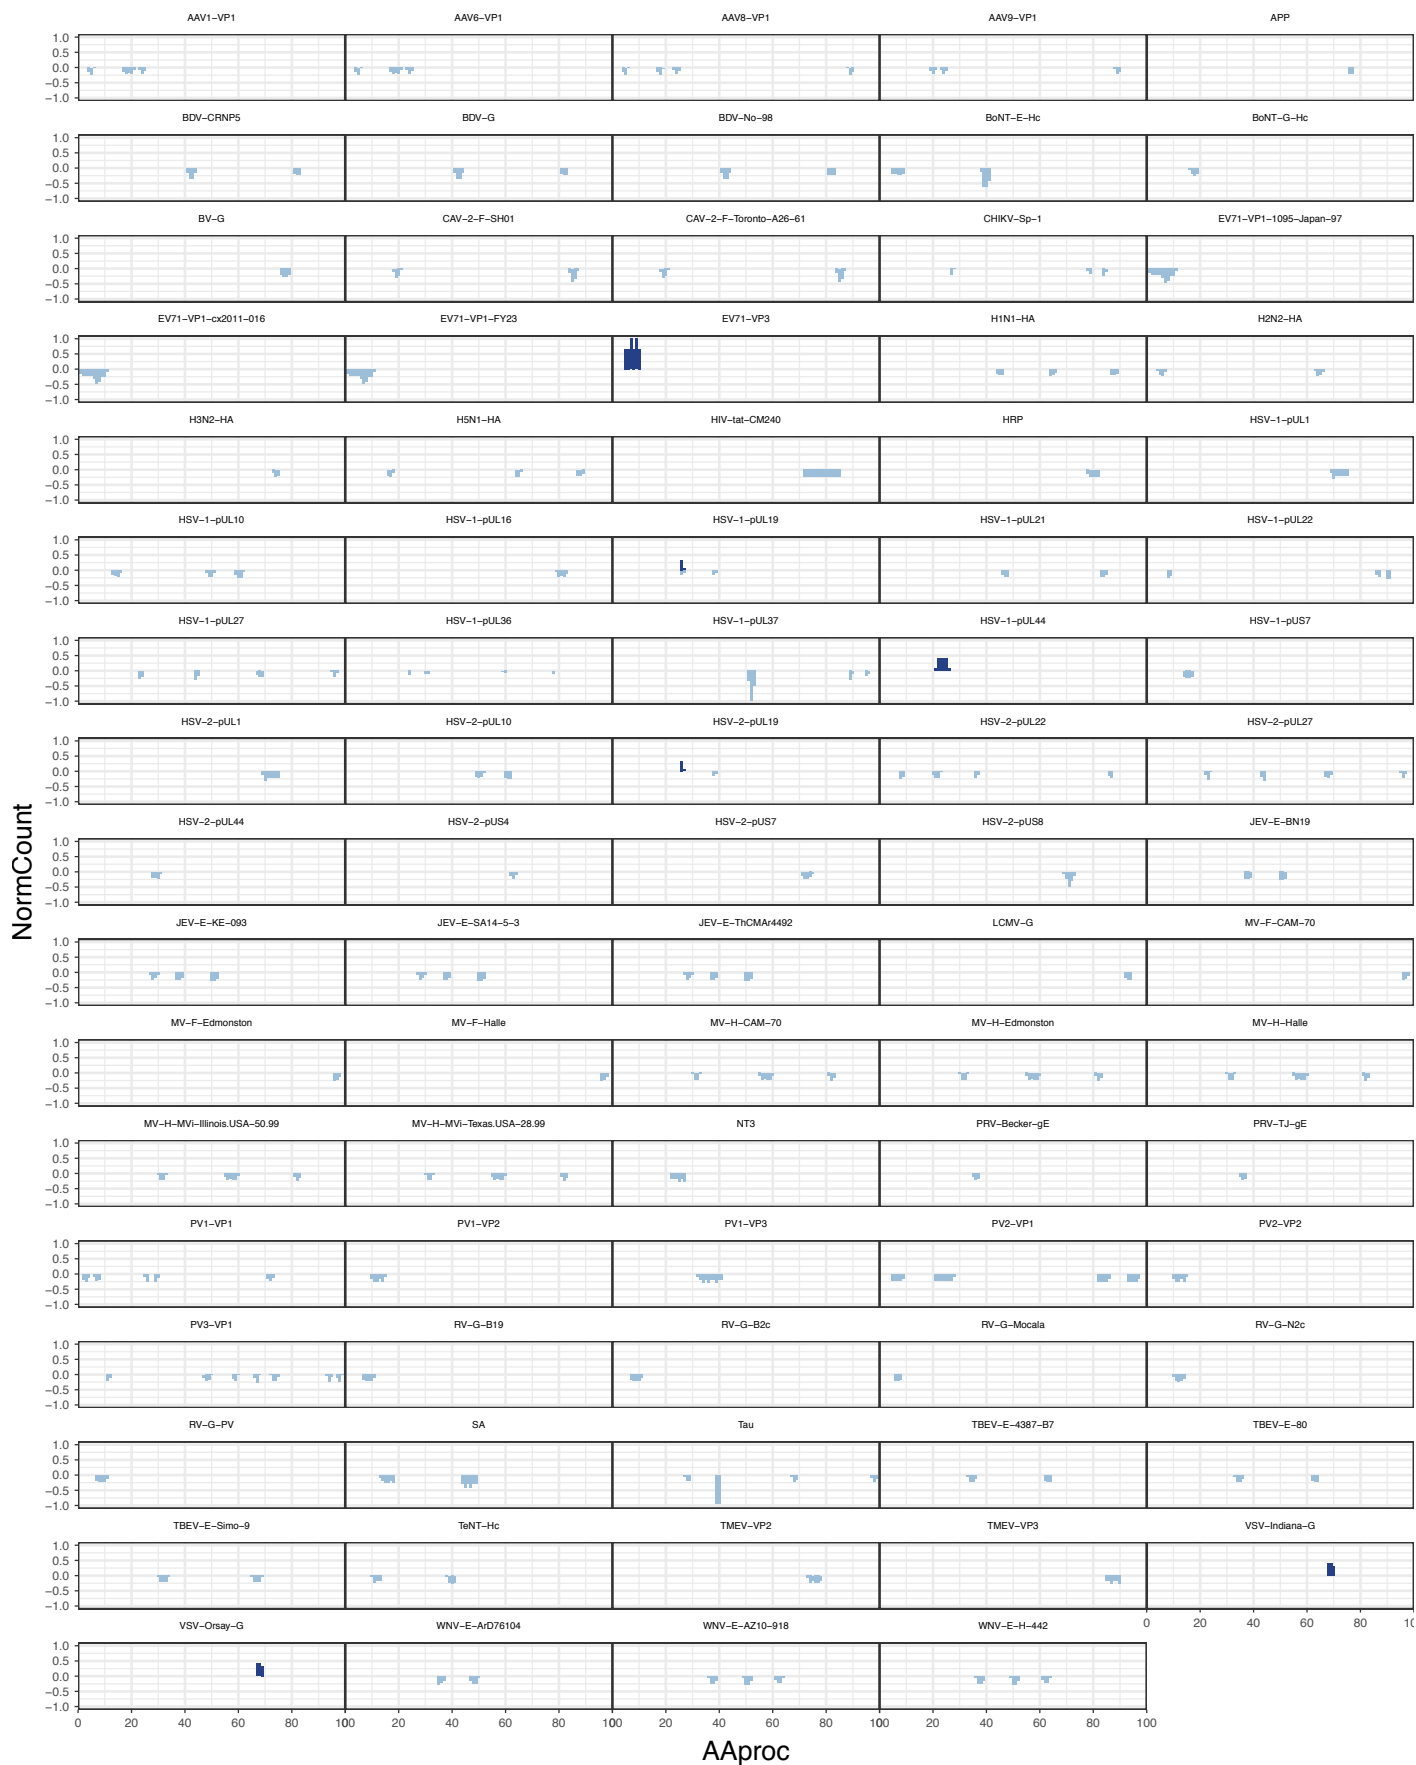

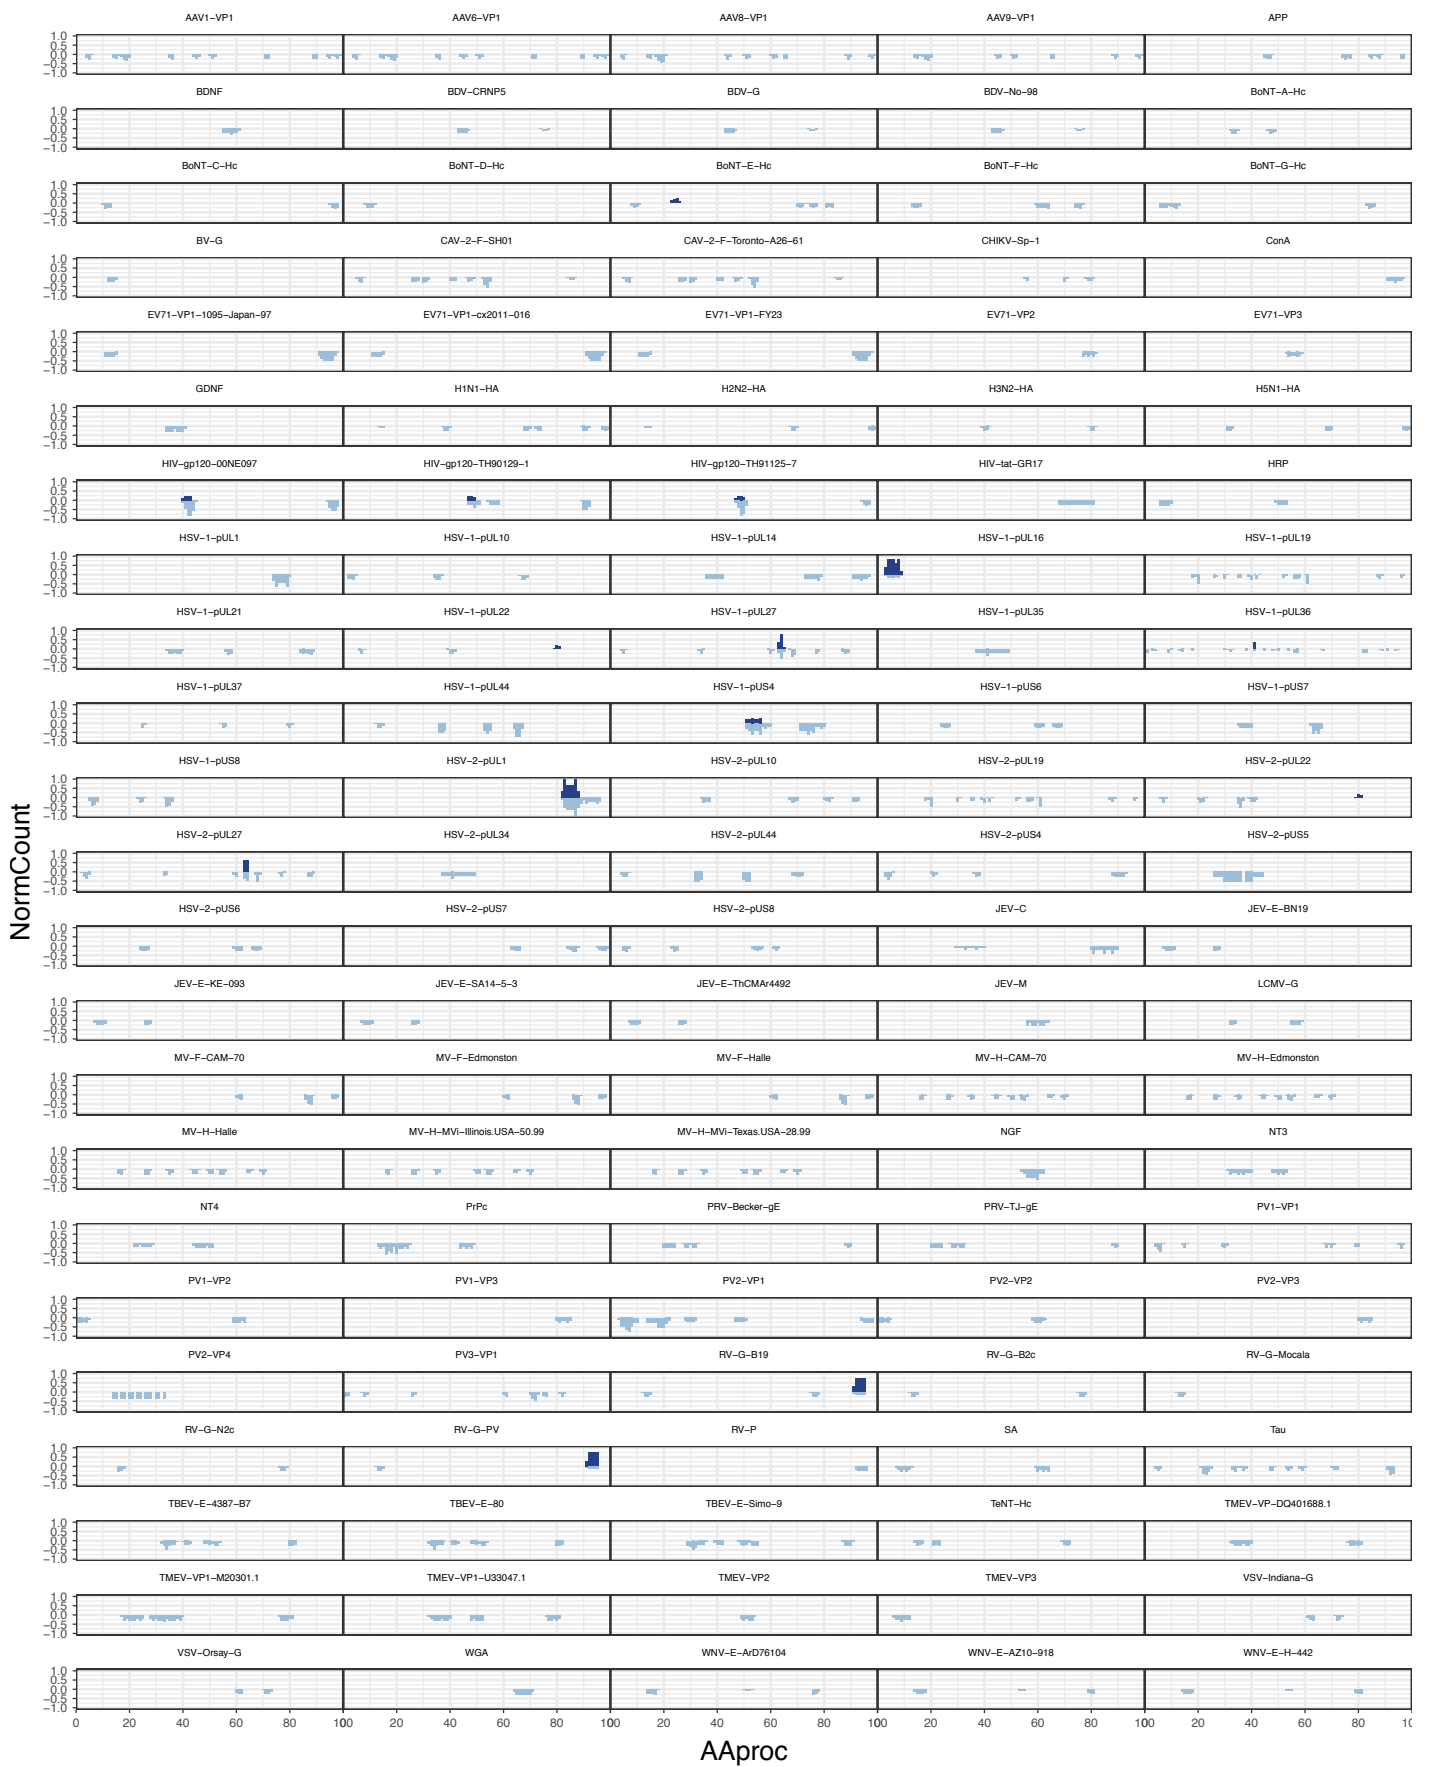

Library ■ mRNA\_30cpc\_pNeuron ■ mRNA\_3cpc\_pNeuron

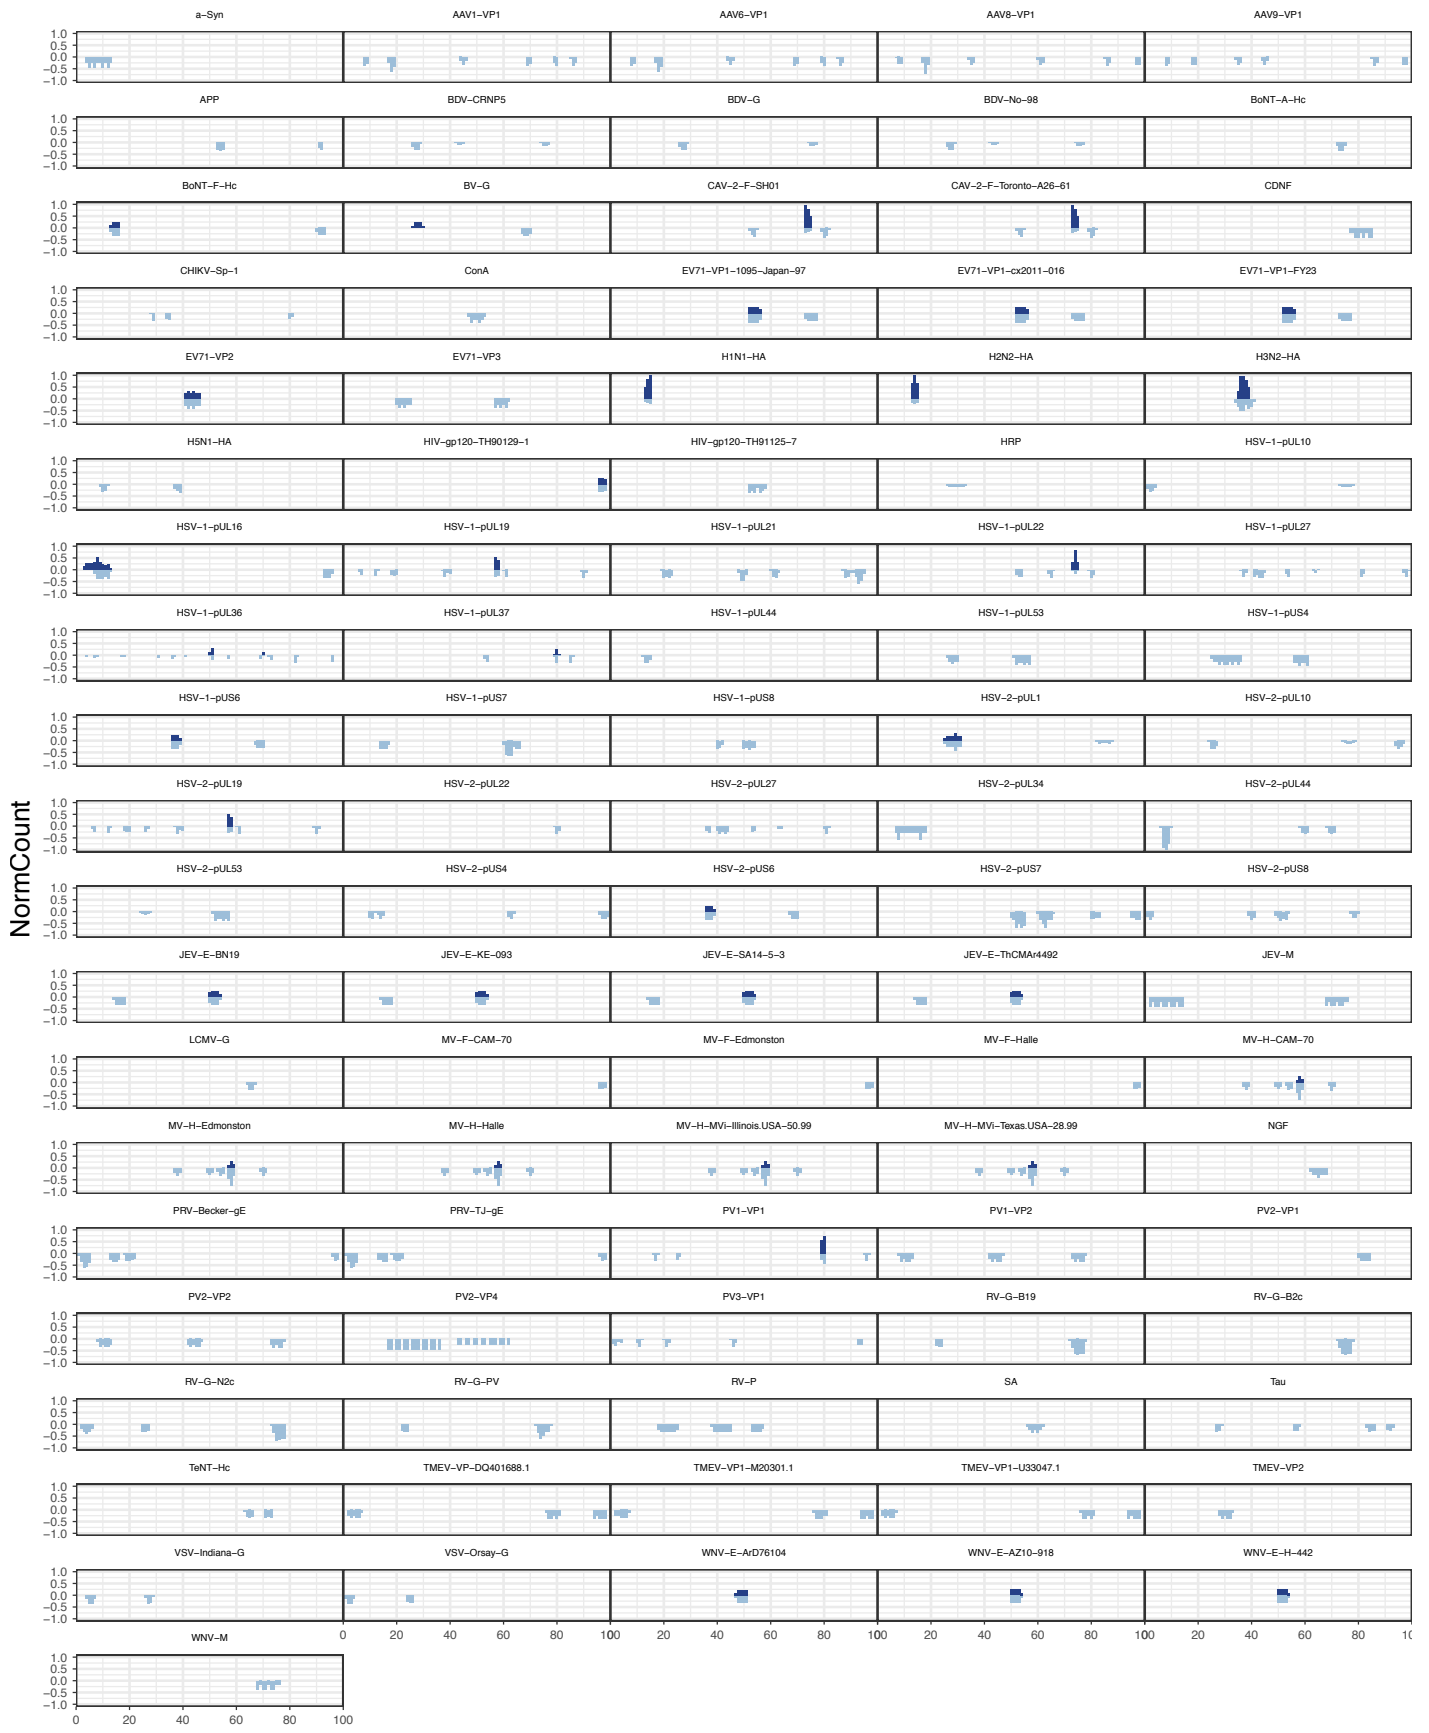

Aaproc

Library ■ mRNA\_30cpc\_HEK293T ■ mRNA\_3cpc\_HEK293T

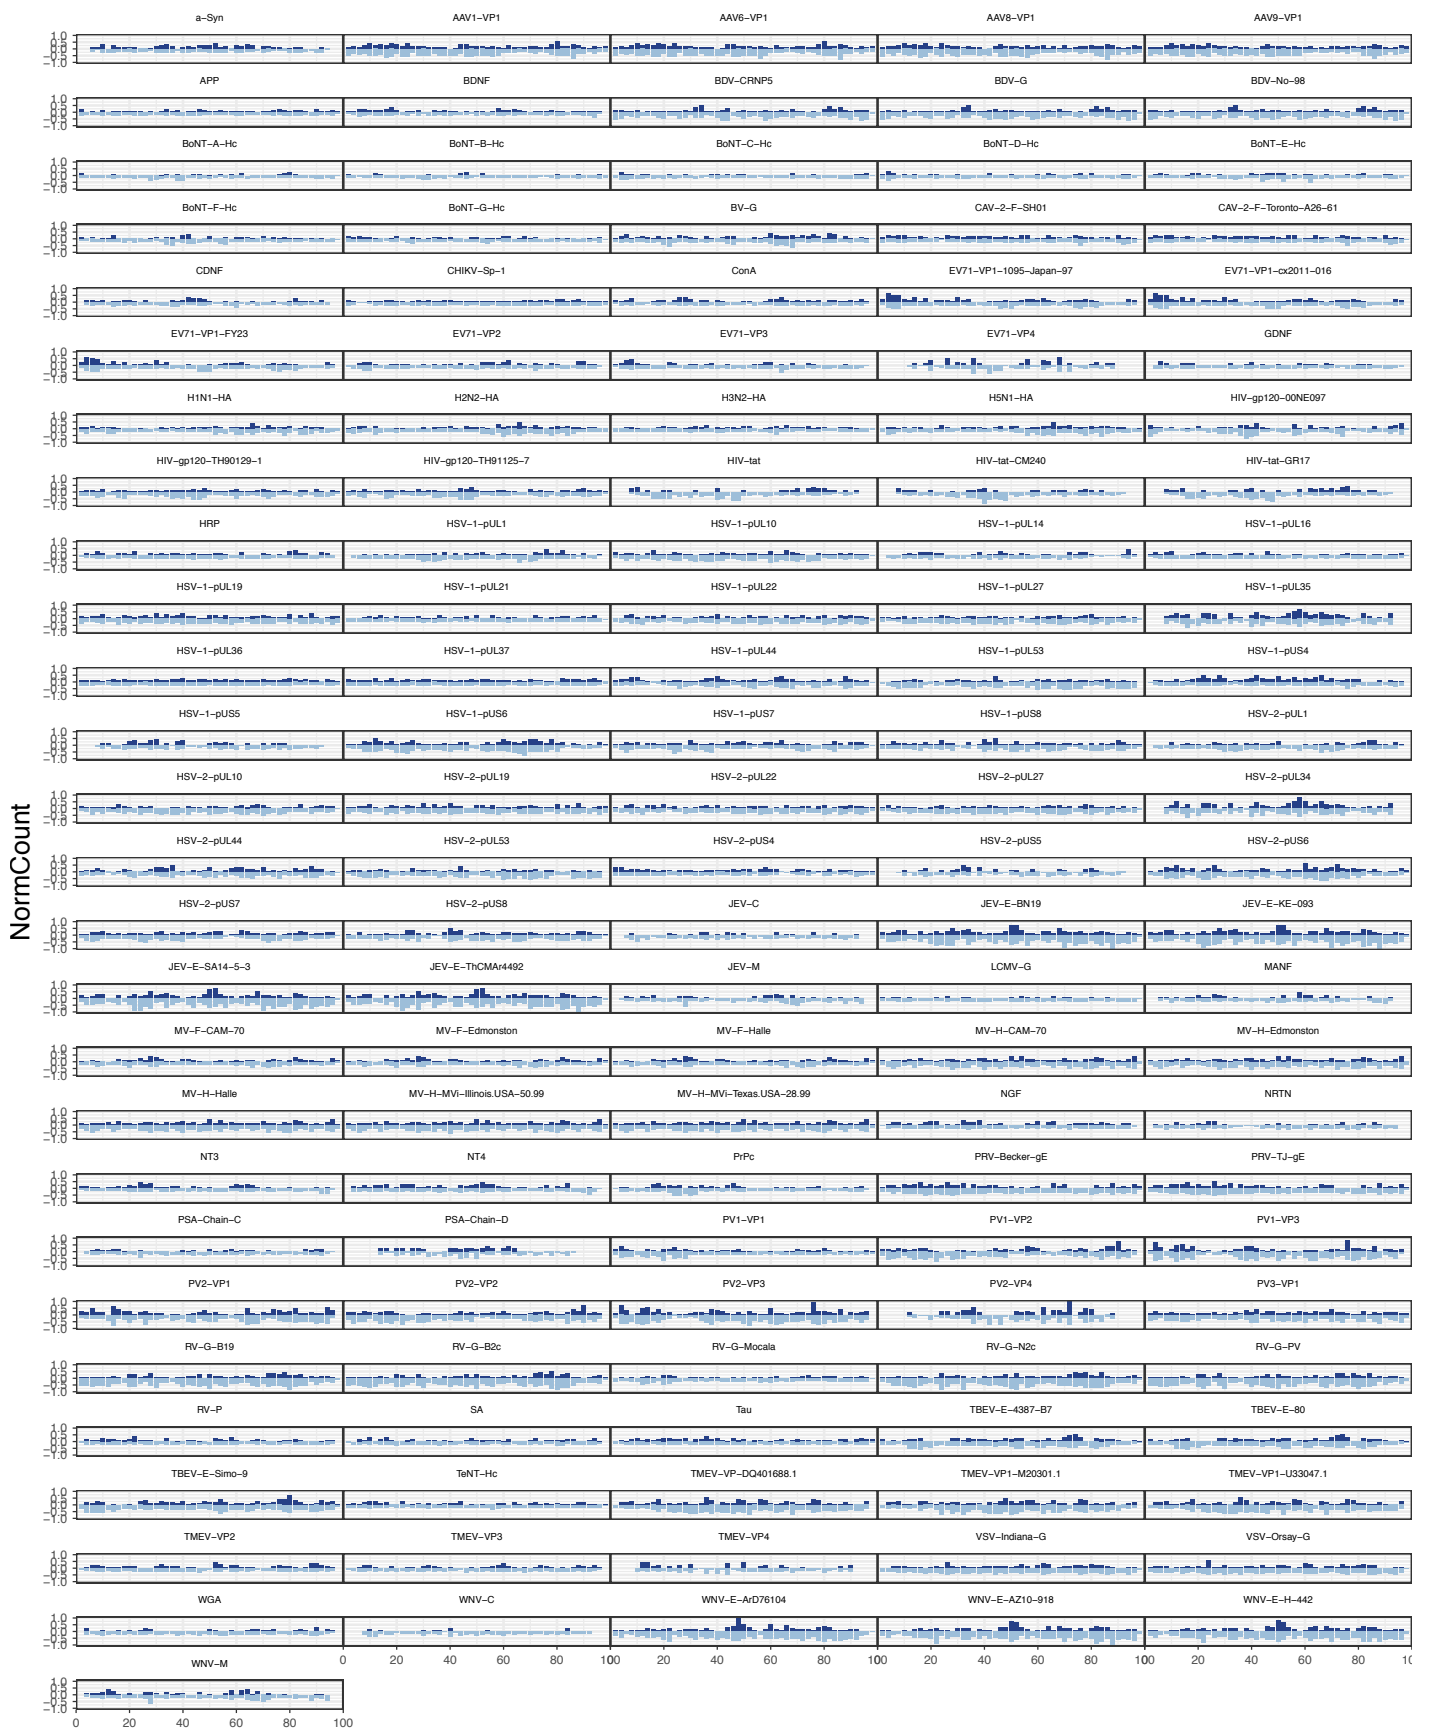

Aaproc

Library ■ DNA\_pscAAVlib ■ mRNA\_All

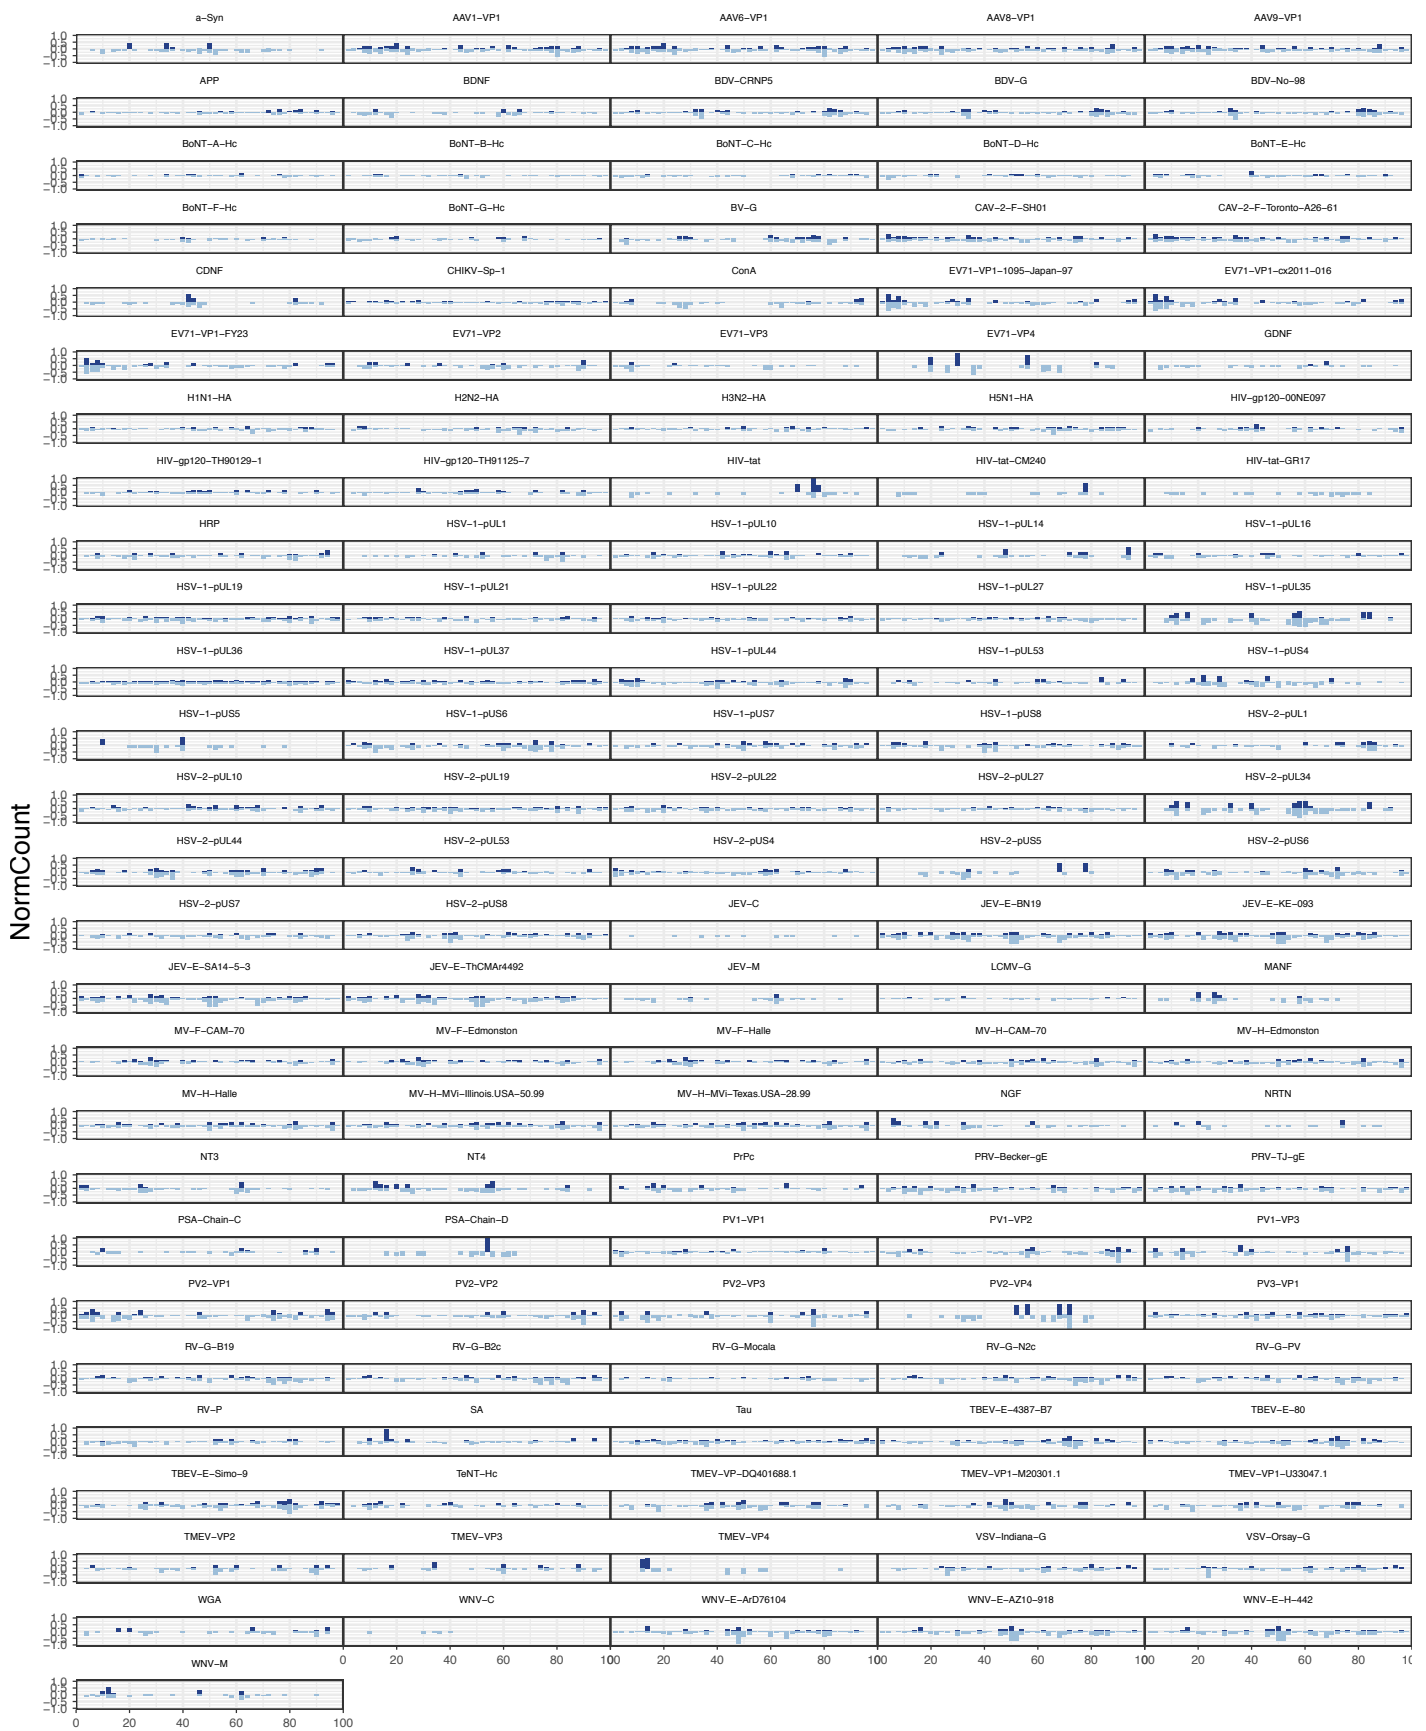

Aaproc

Library mRNA\_30cpc\_Str mRNA\_3cpc\_Str

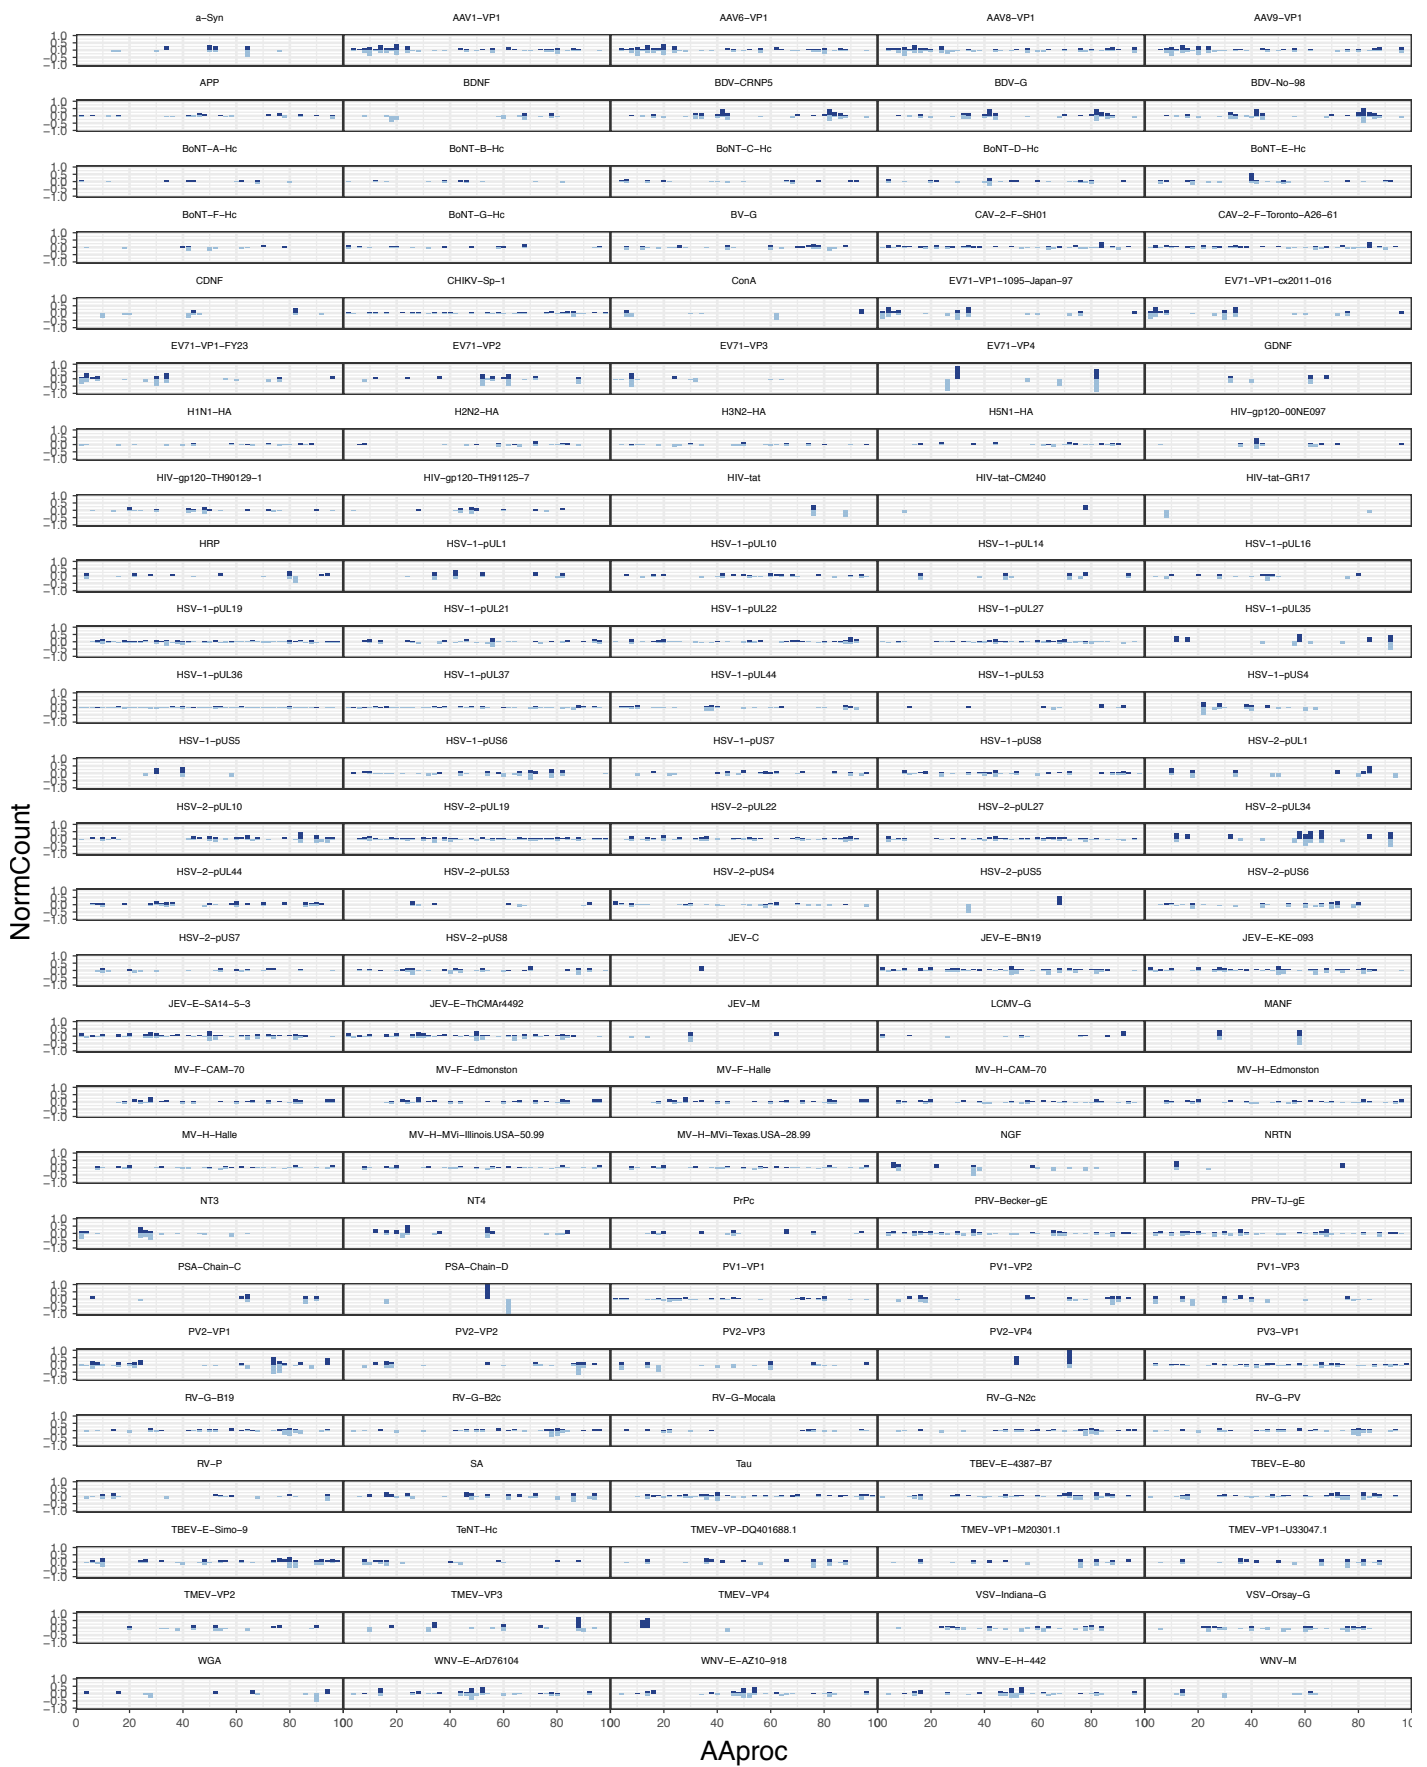

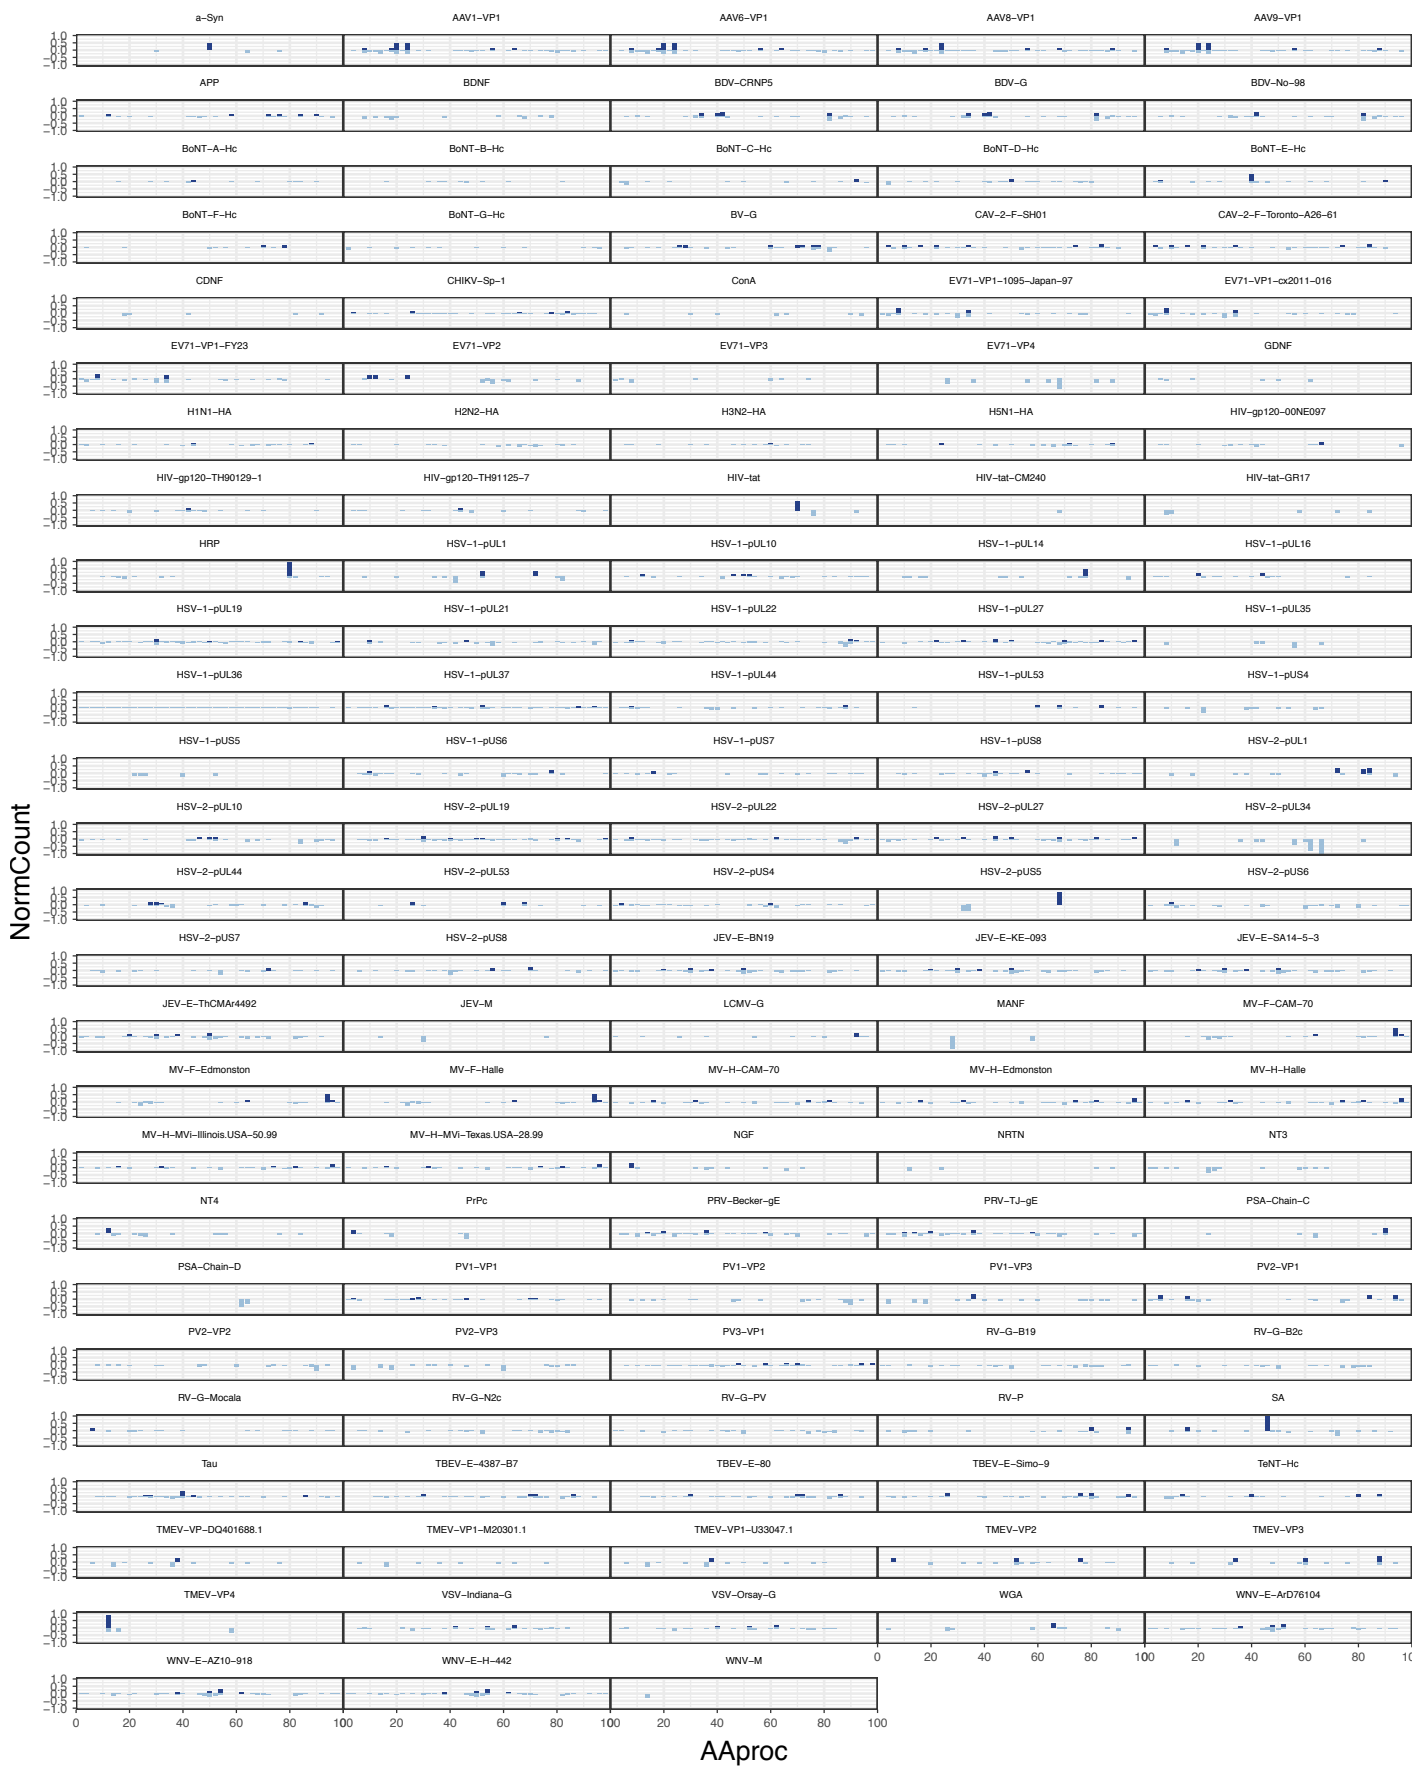



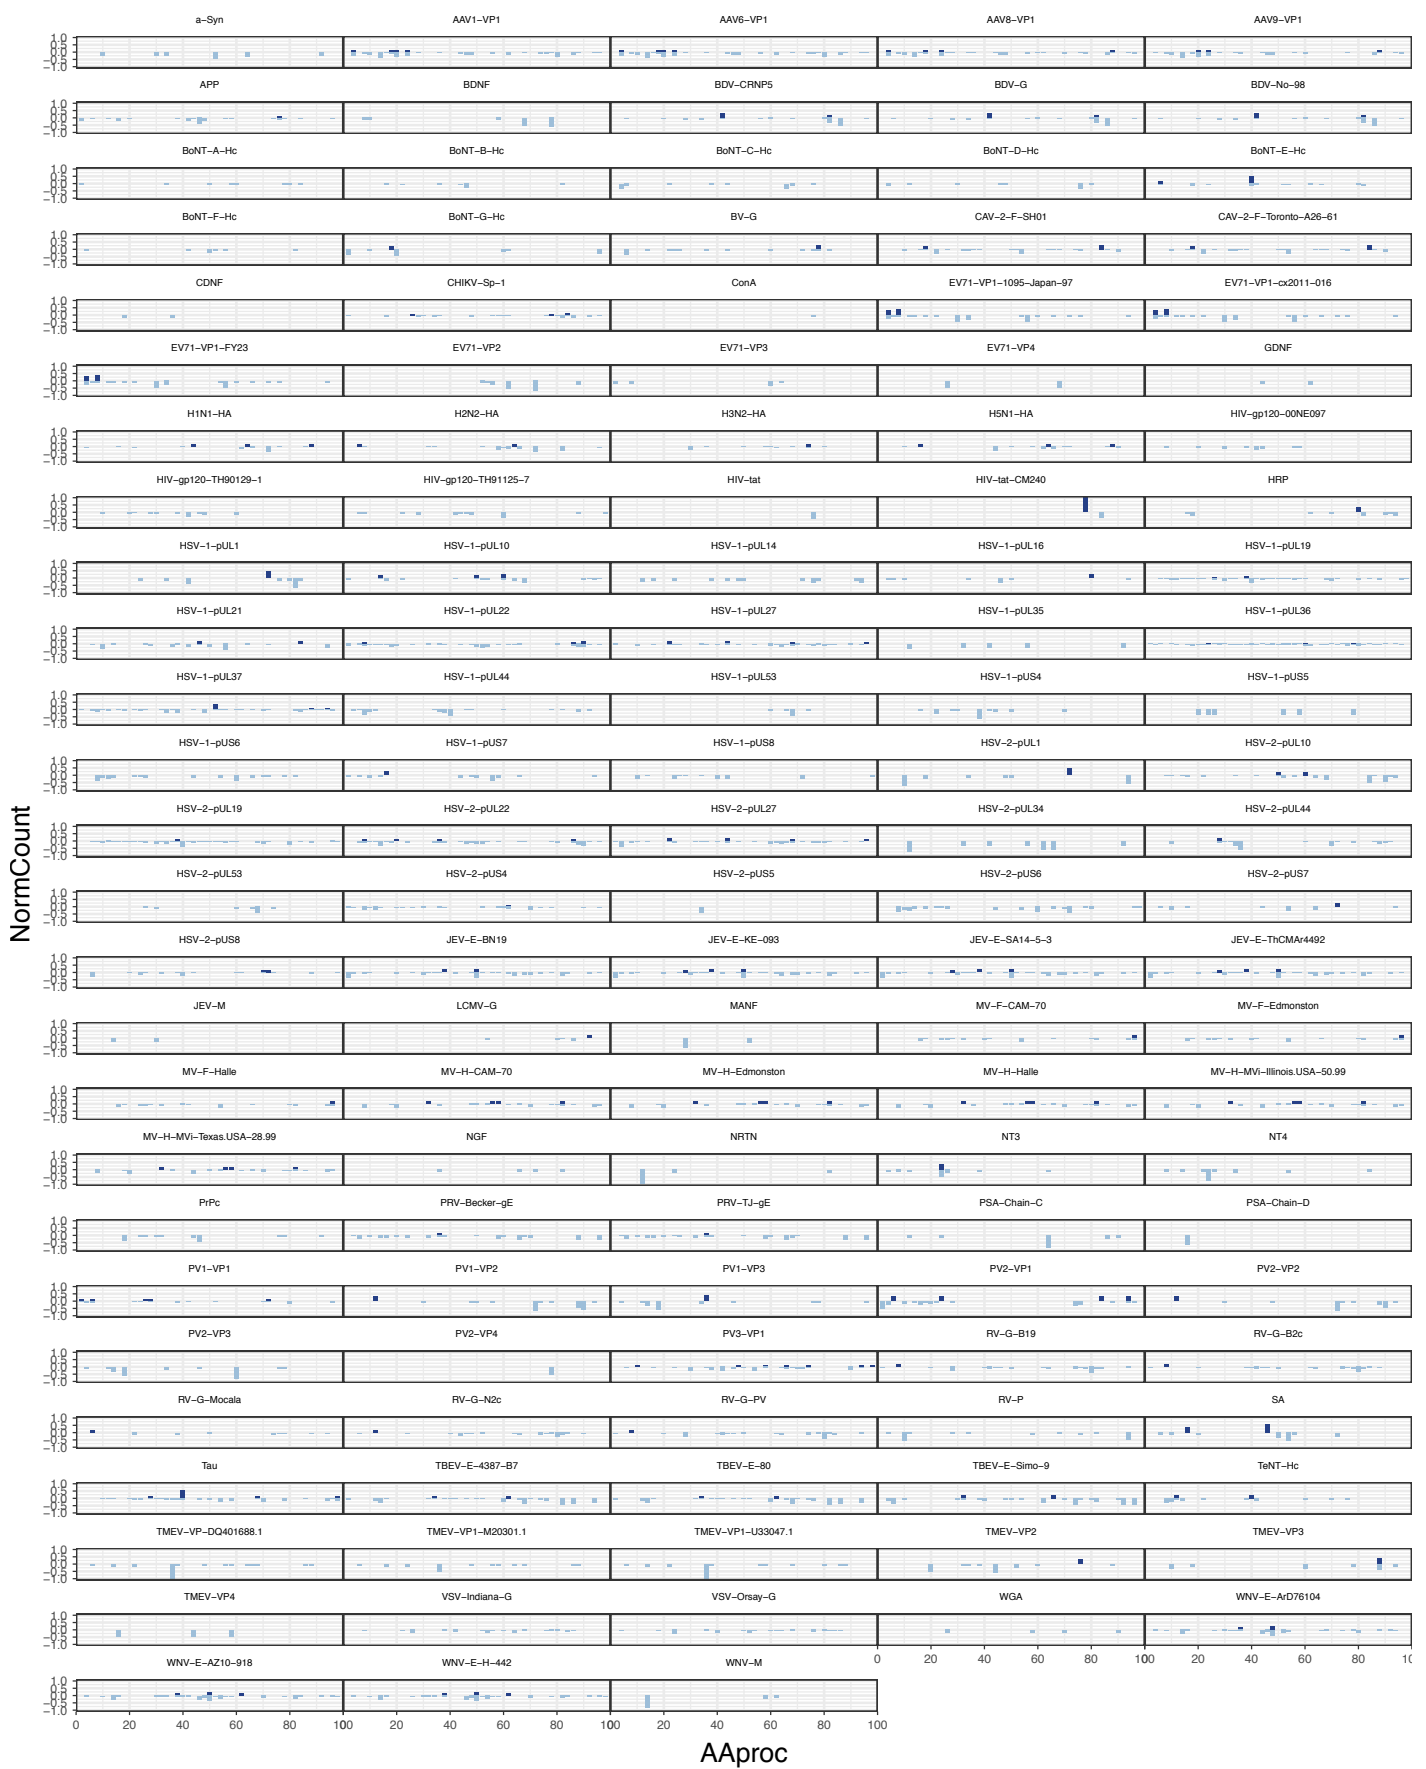

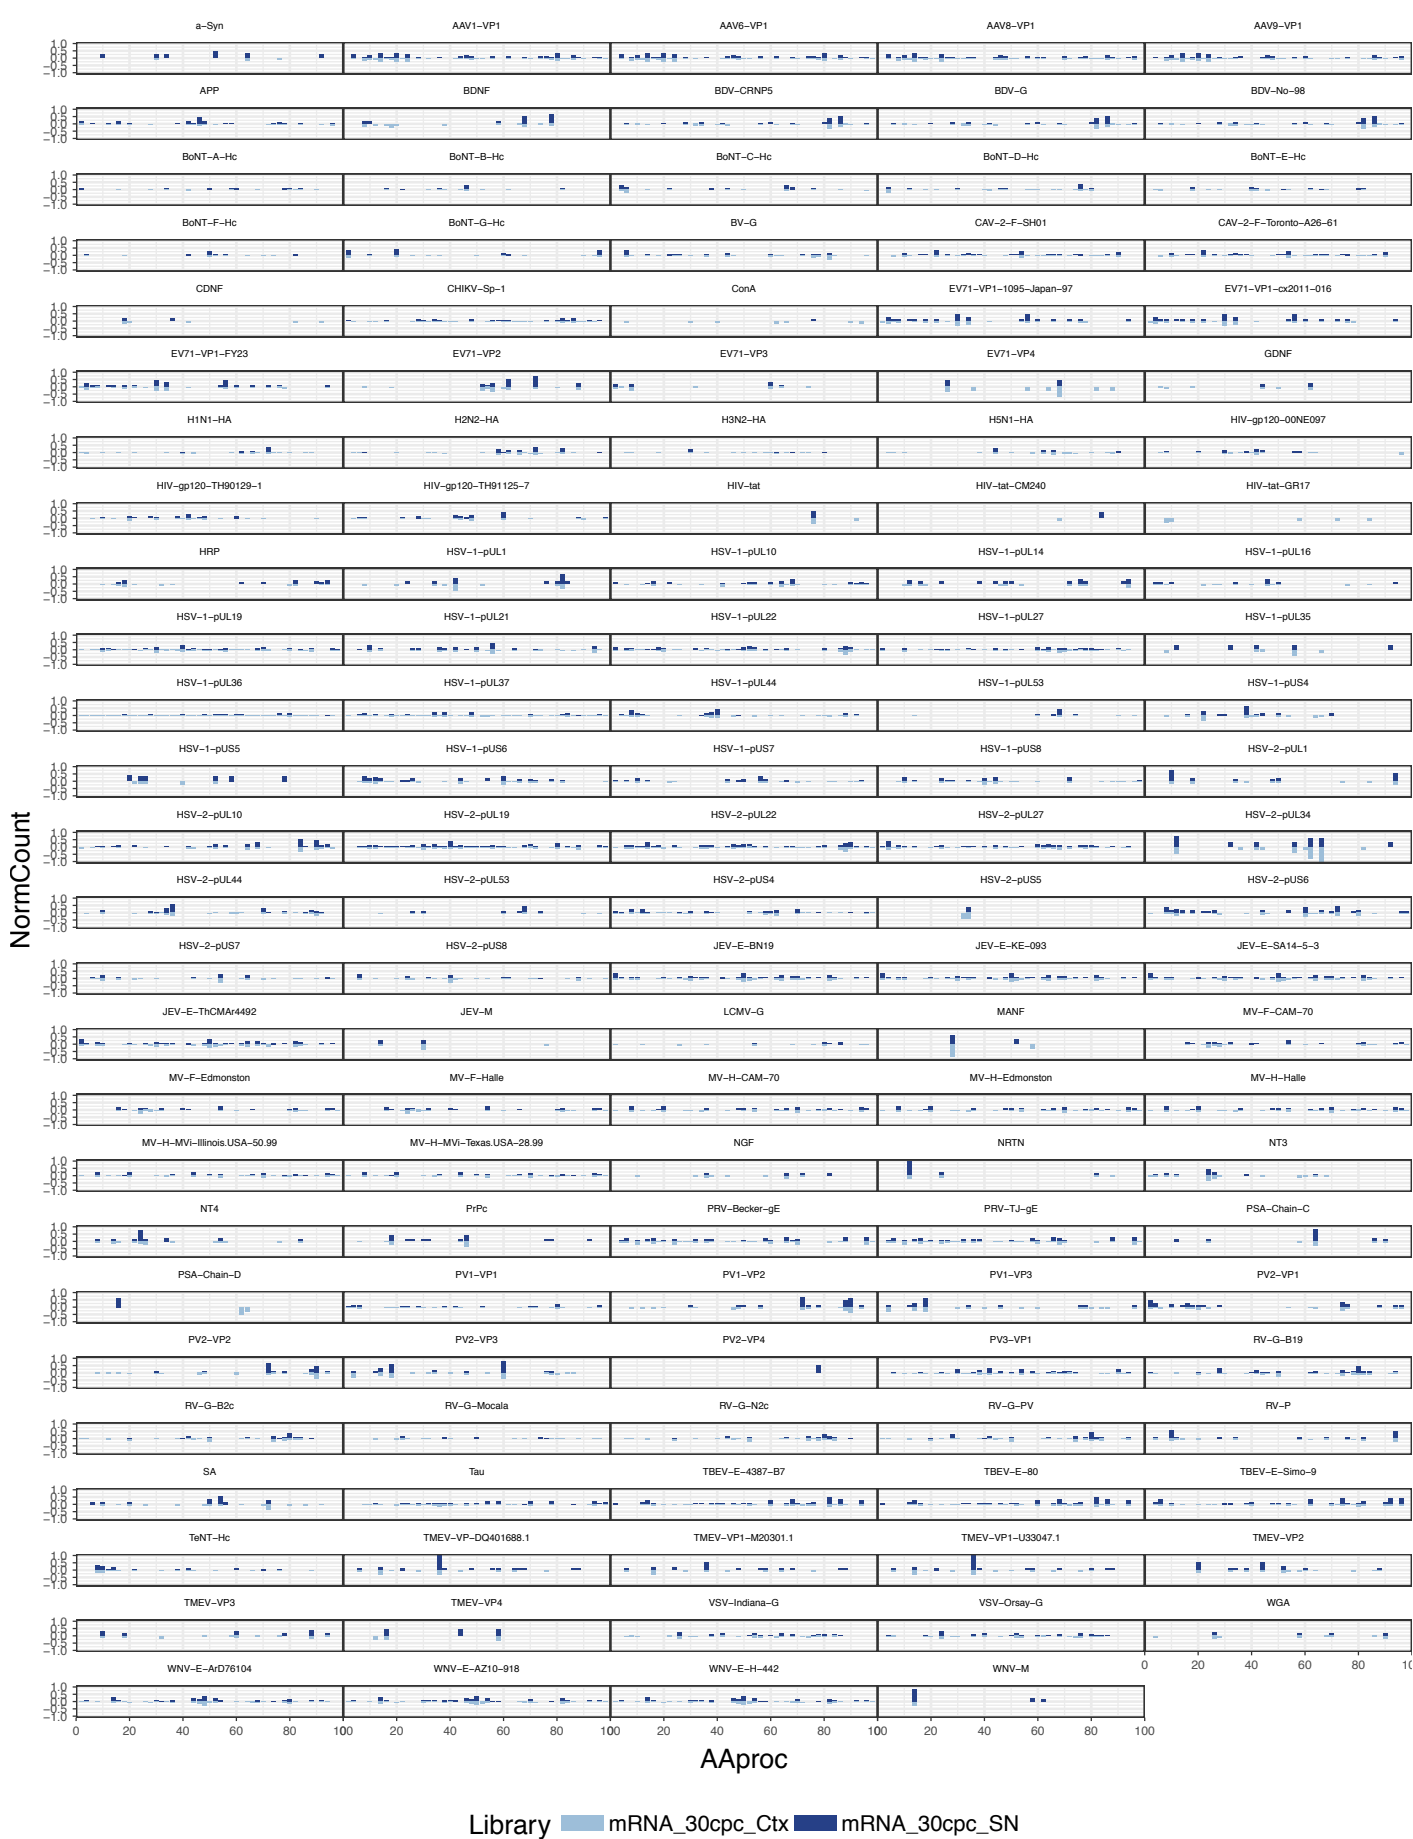

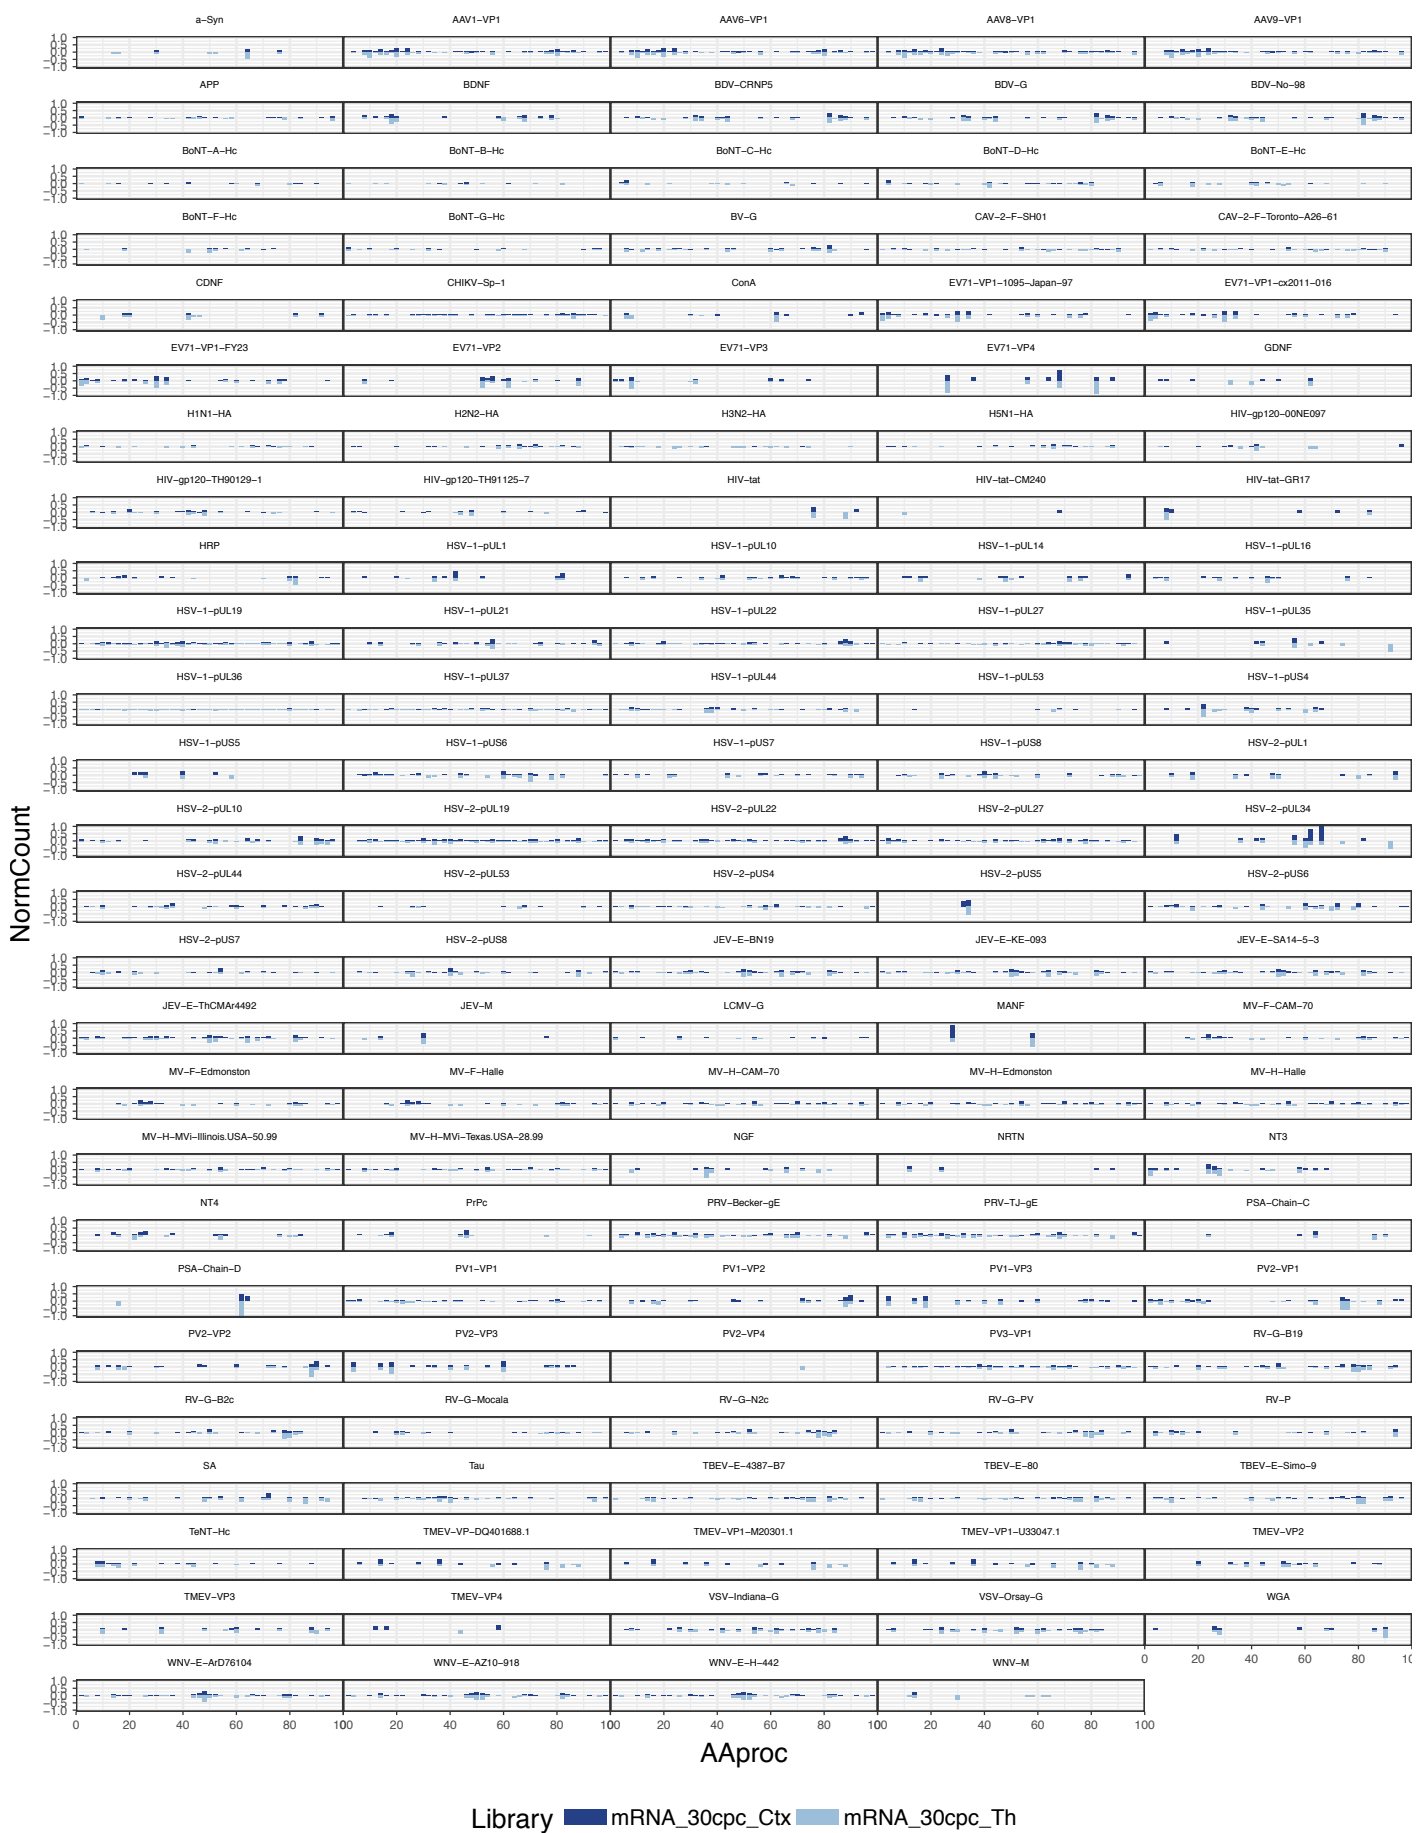

AAprc

Library ■ mRNA\_30cpc\_Ctx ■ mRNA\_30cpc\_Th

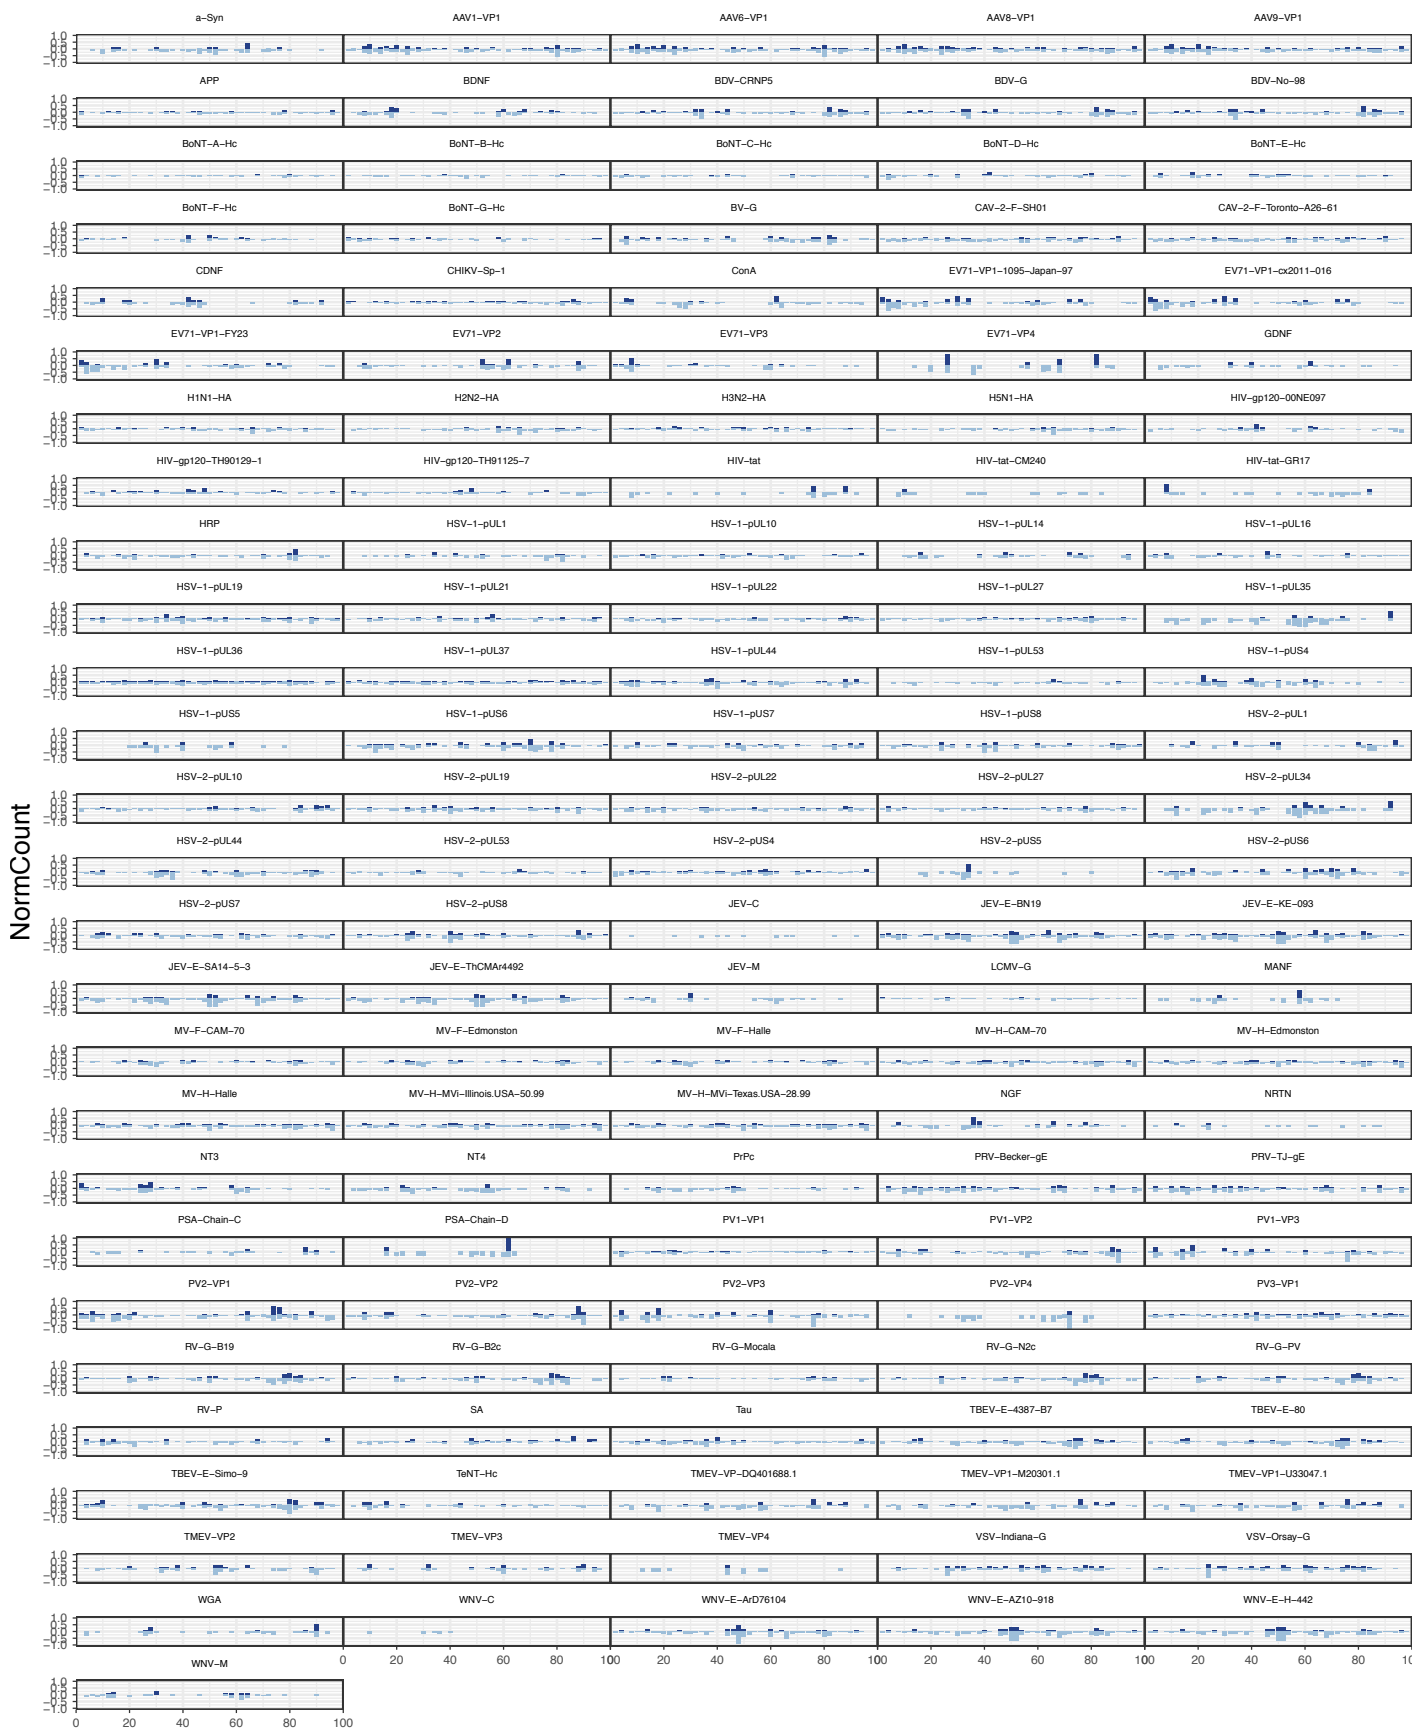

Aaproc

Library mRNA\_30cpc\_Str mRNA\_30cpc\_Th

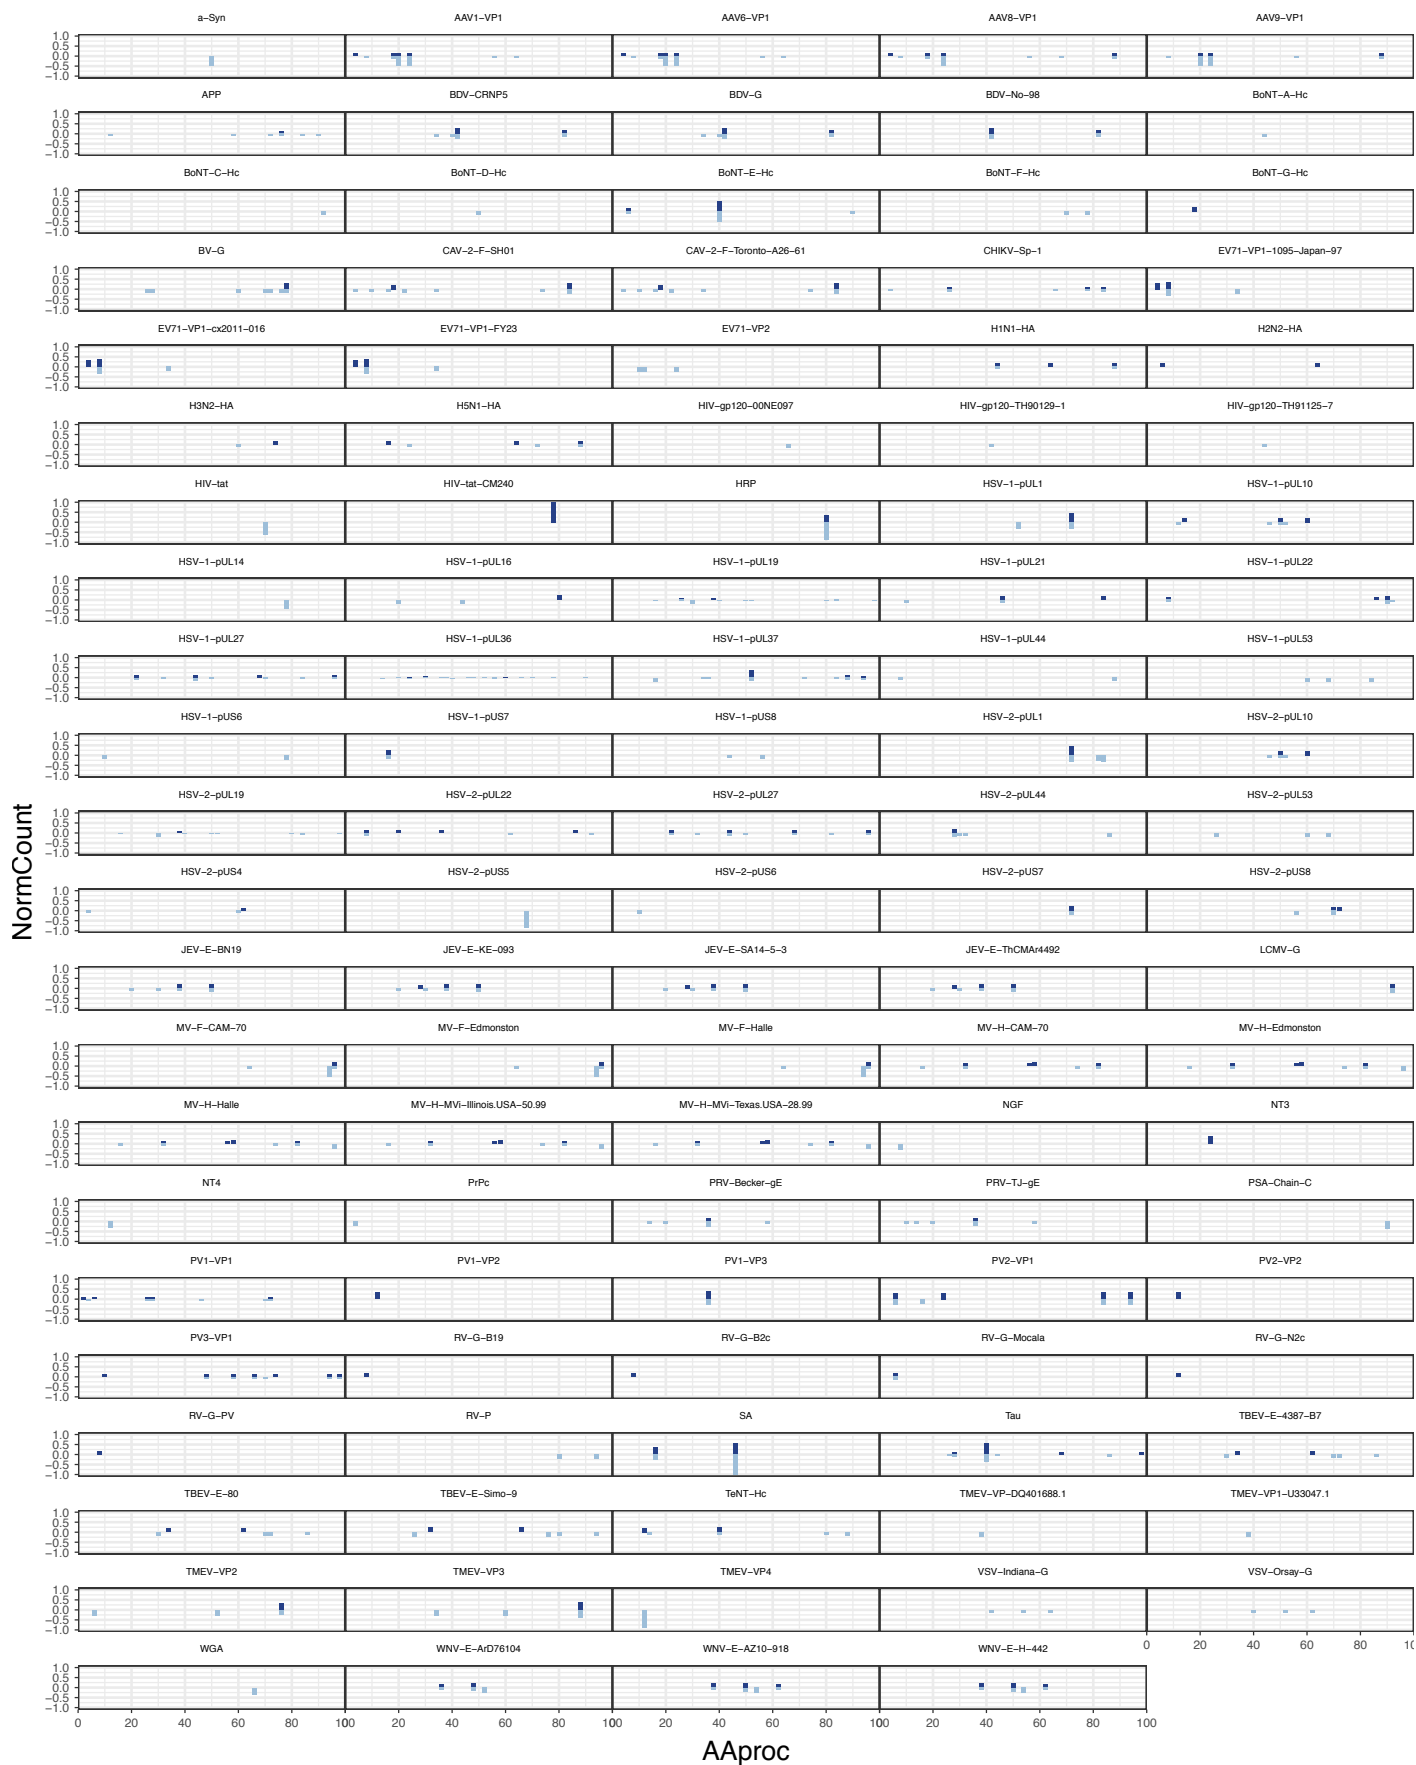

Library mRNA\_3cpc\_Ctx mRNA\_3cpc\_SN

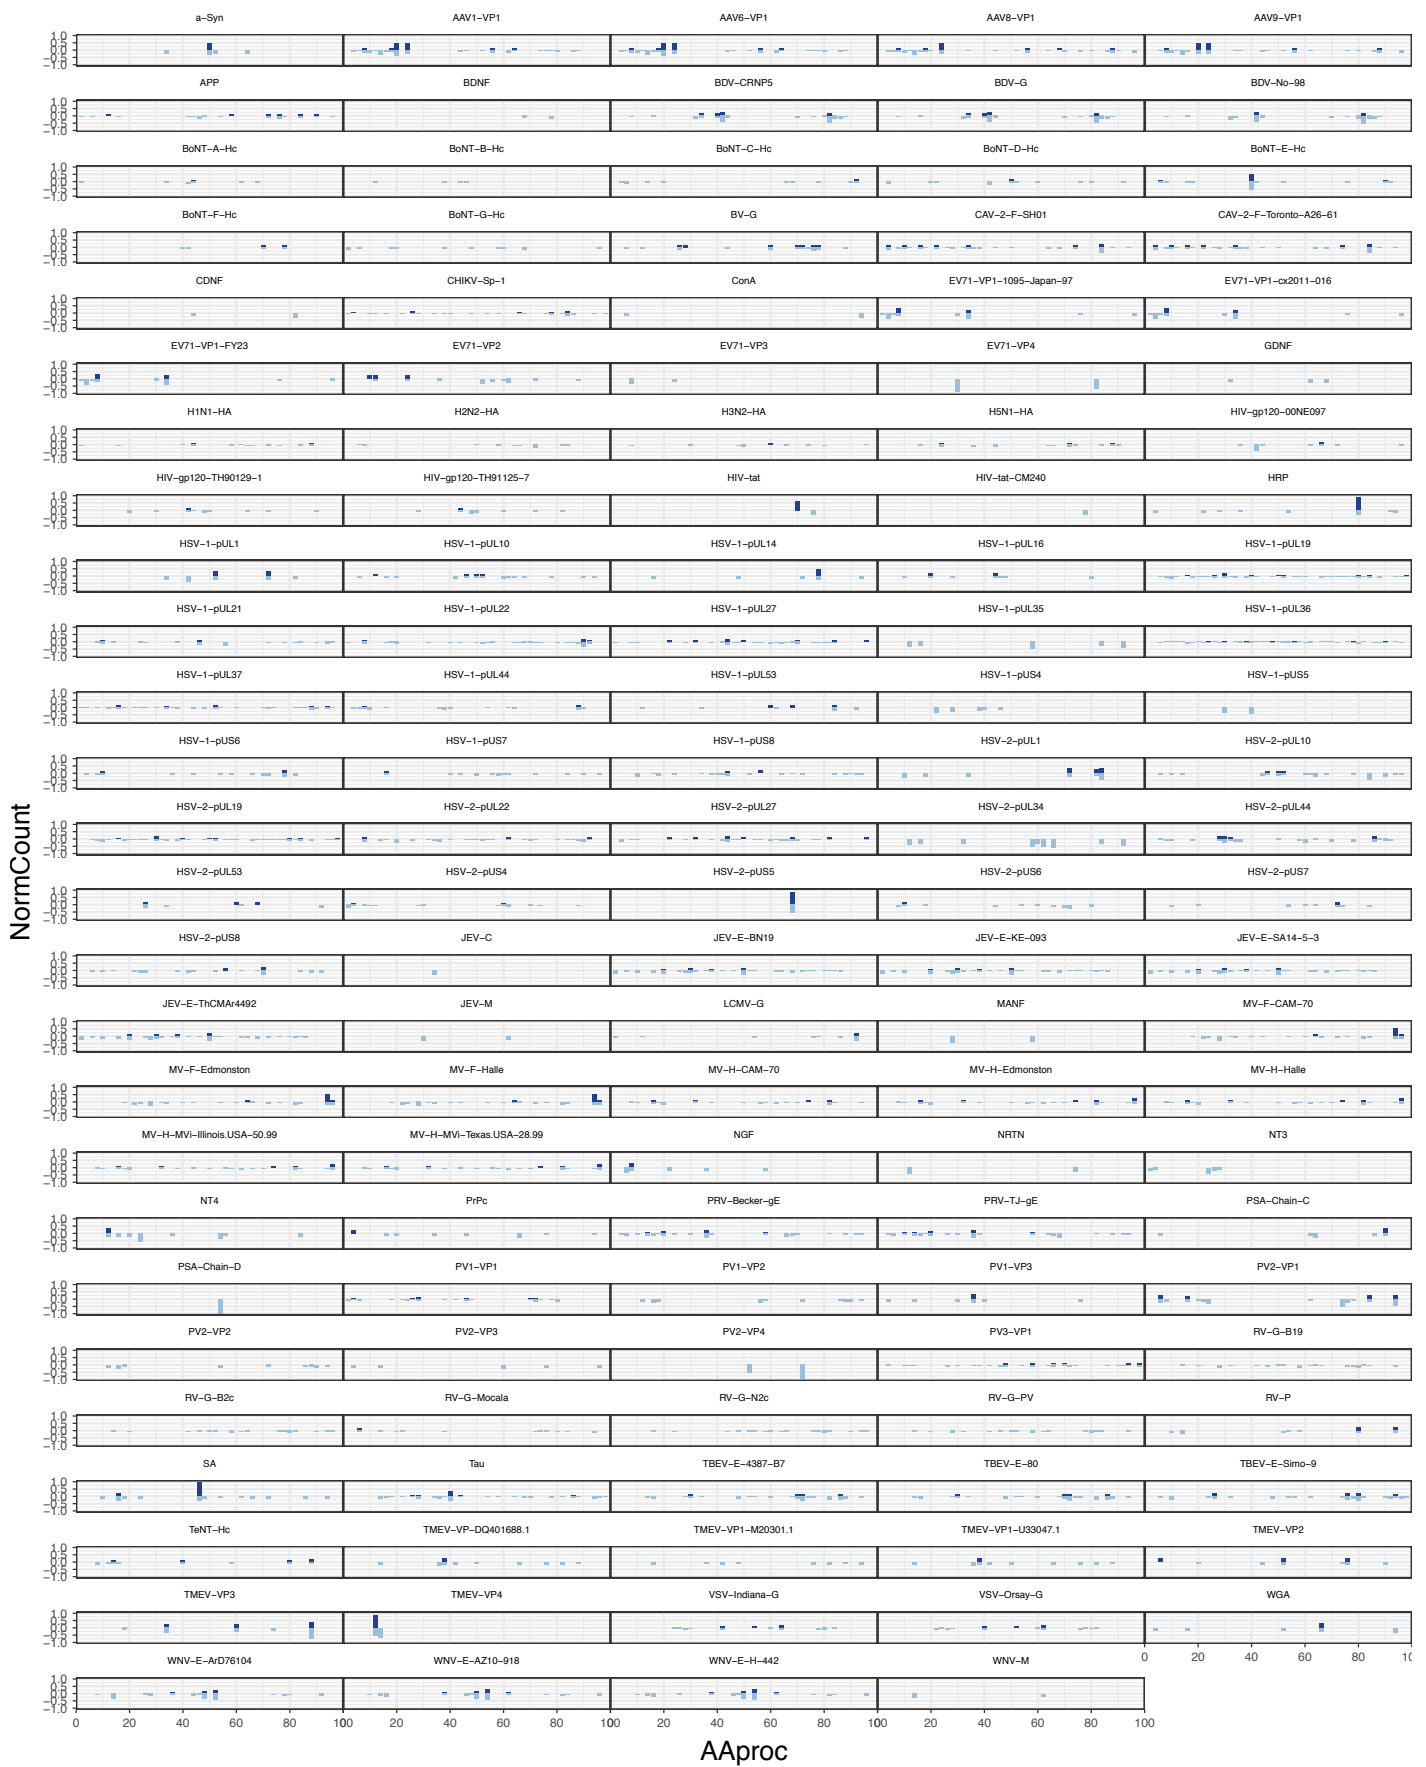

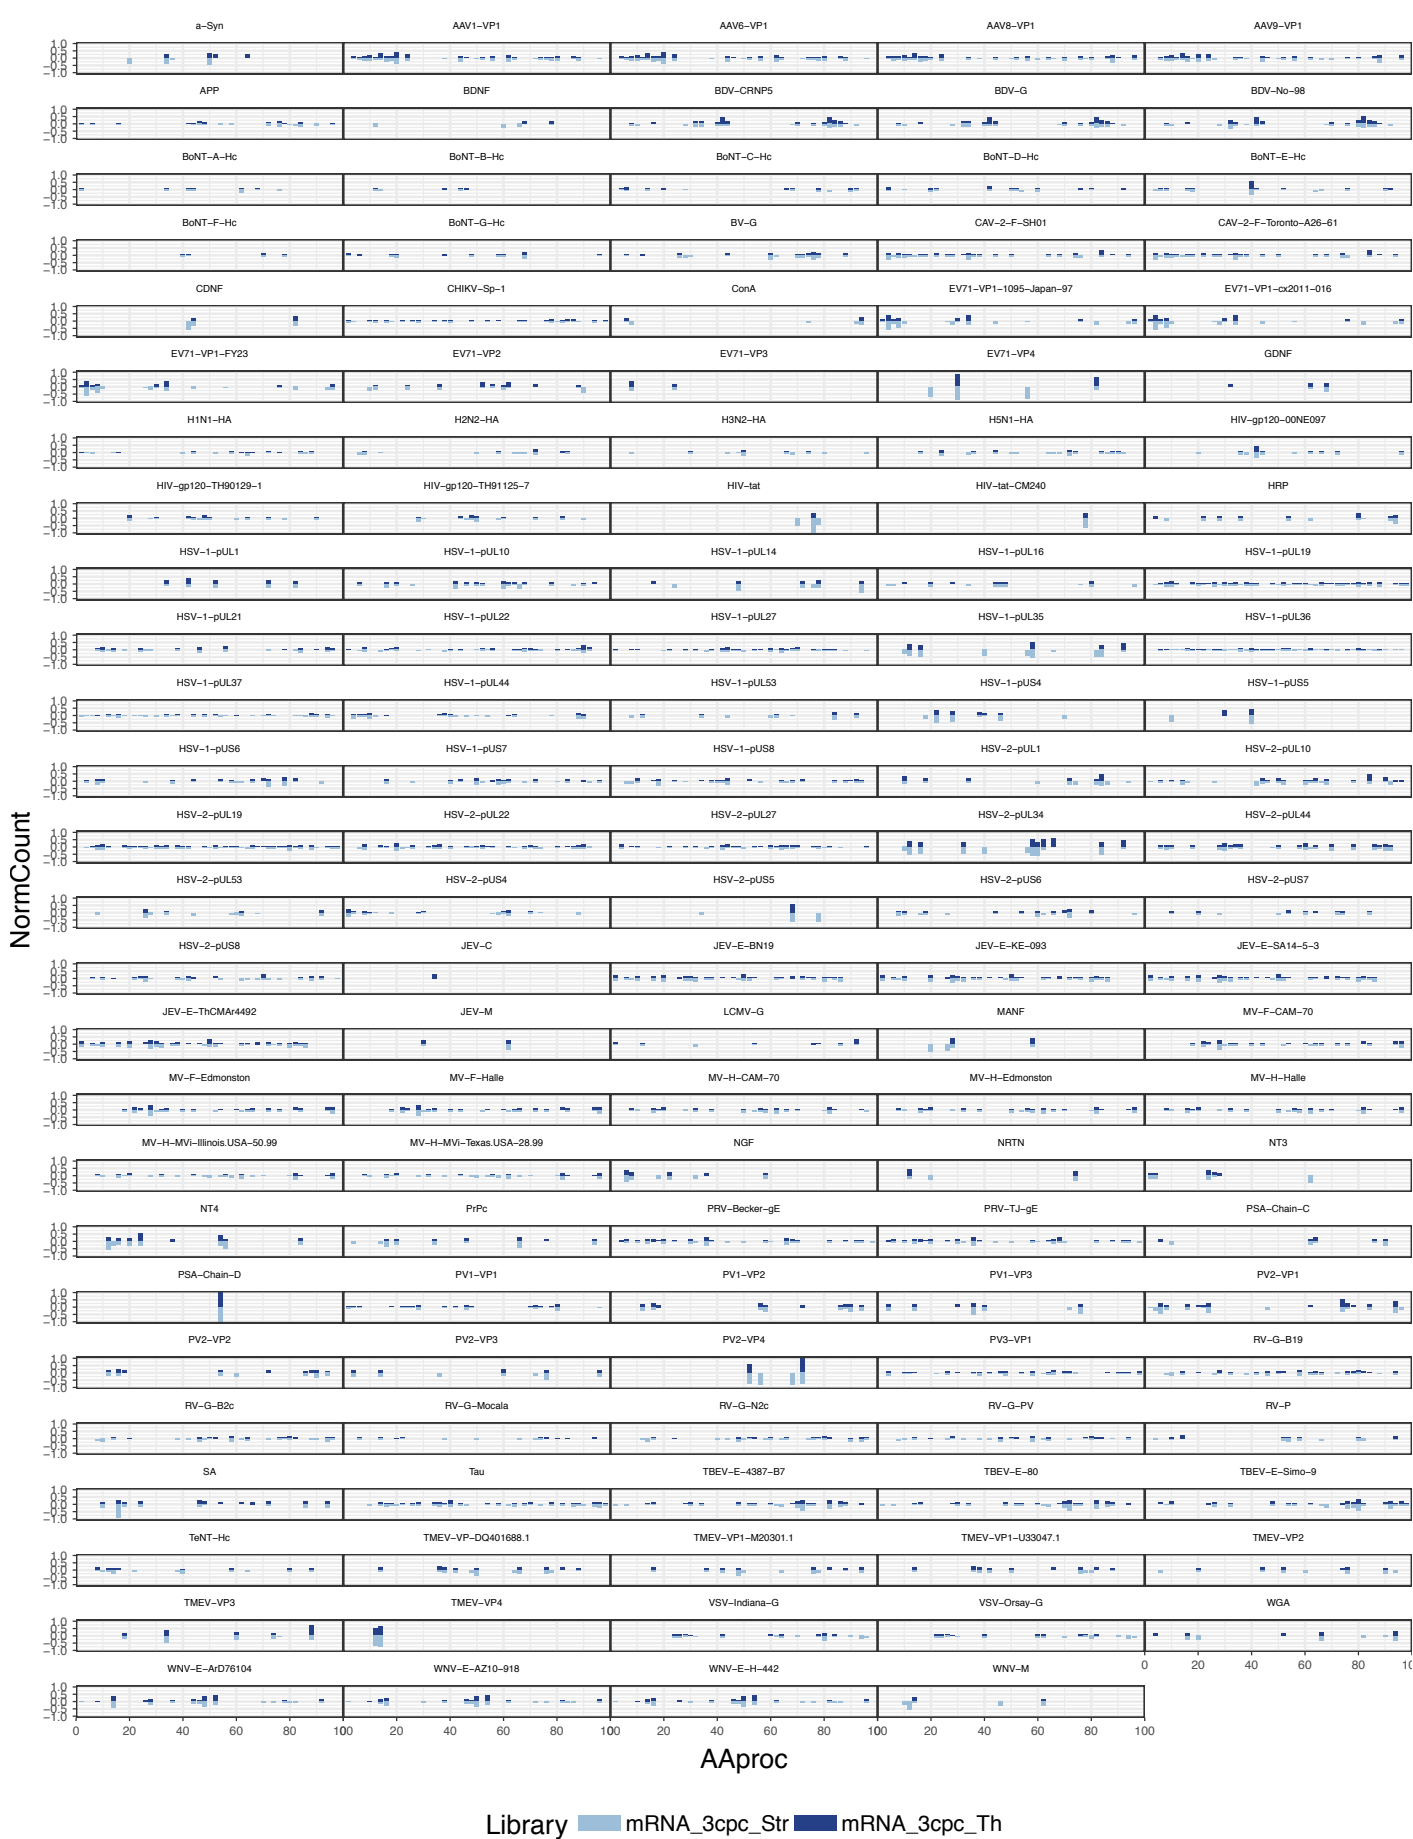

AAprc

Library ■ mRNA\_3cpc\_Str ■ mRNA\_3cpc\_Th

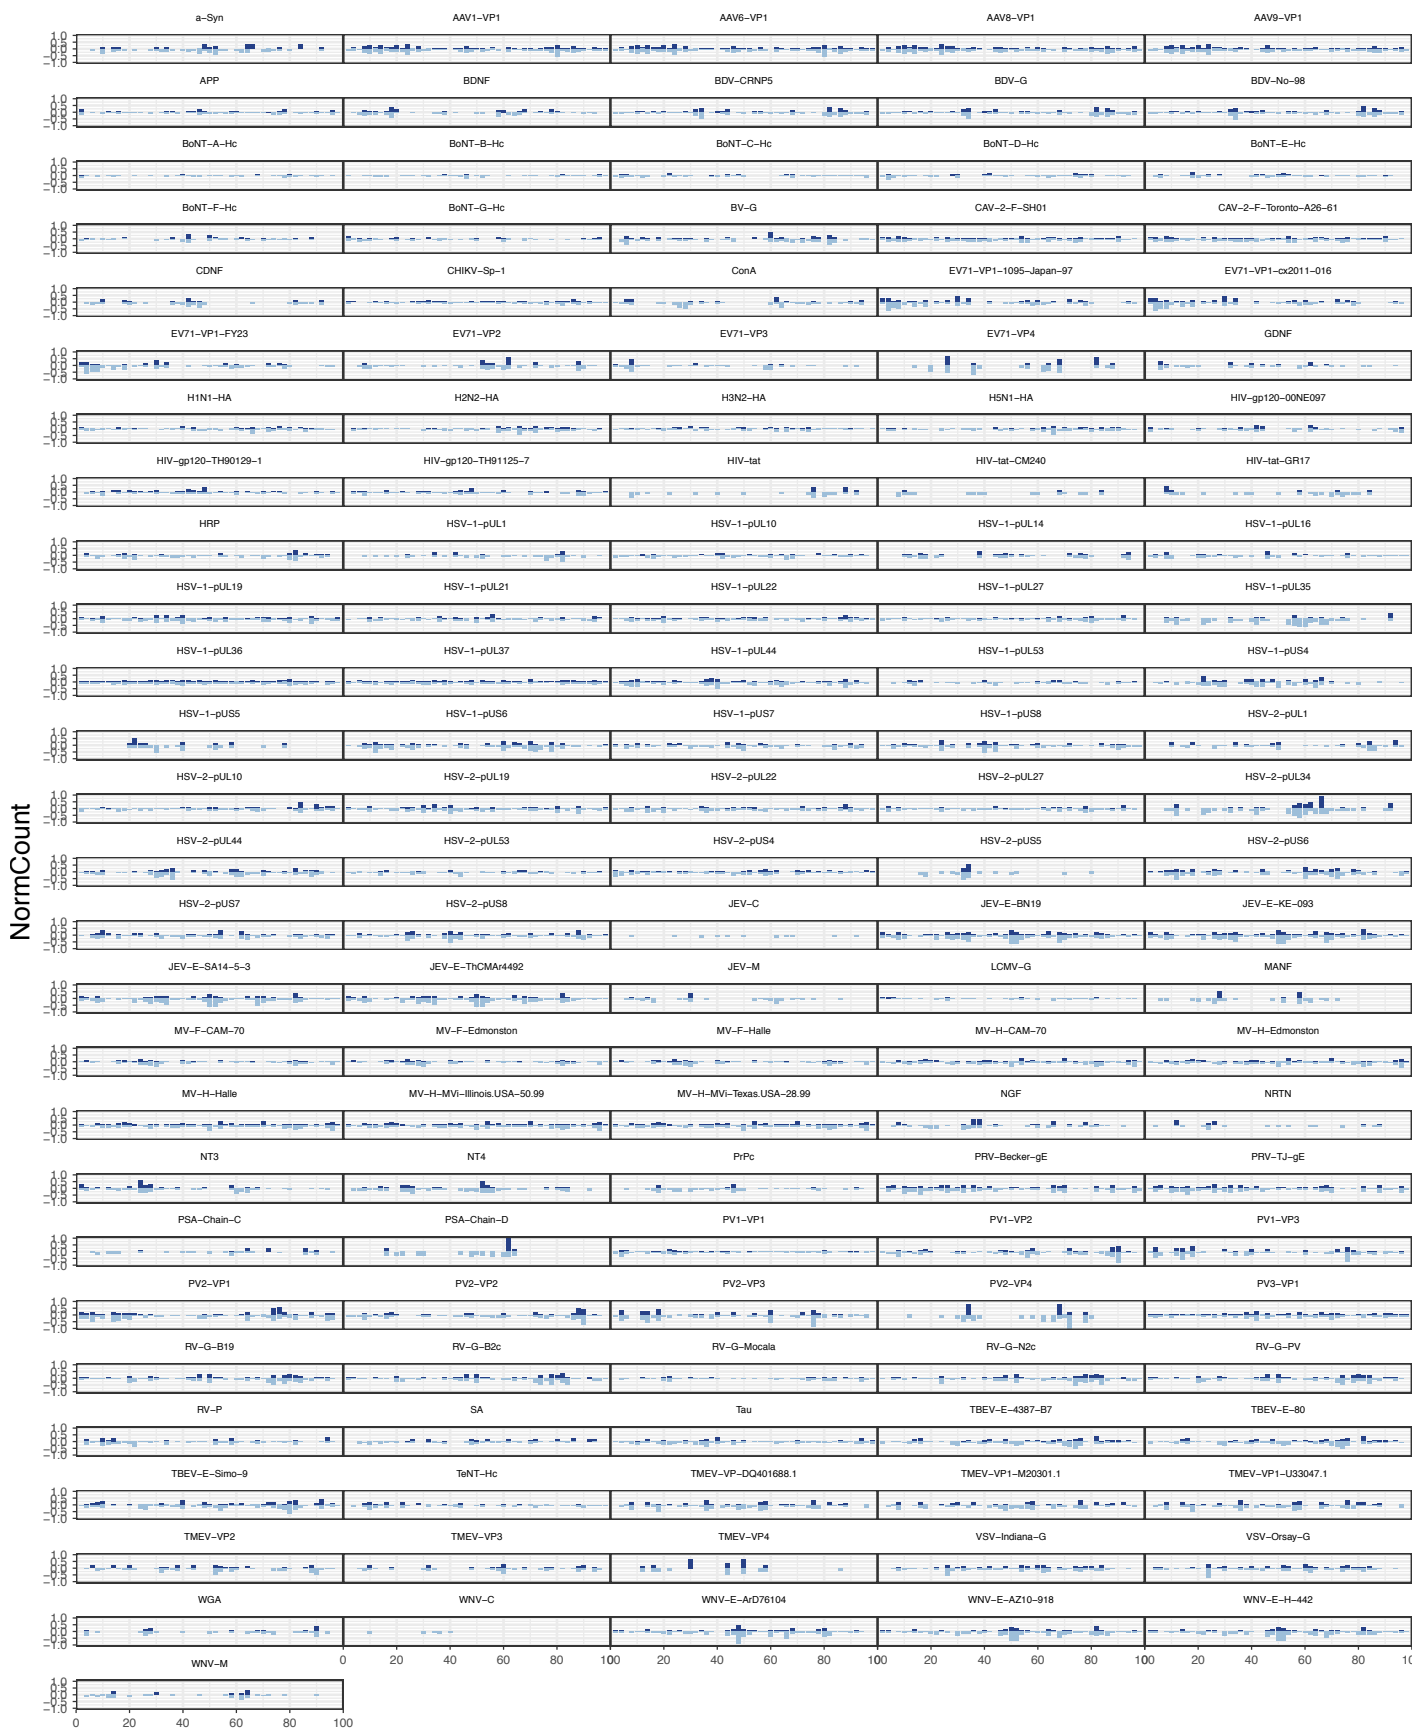

Aaproc

Library mRNA\_30cpc\_Str mRNA\_30cpc\_Trsp



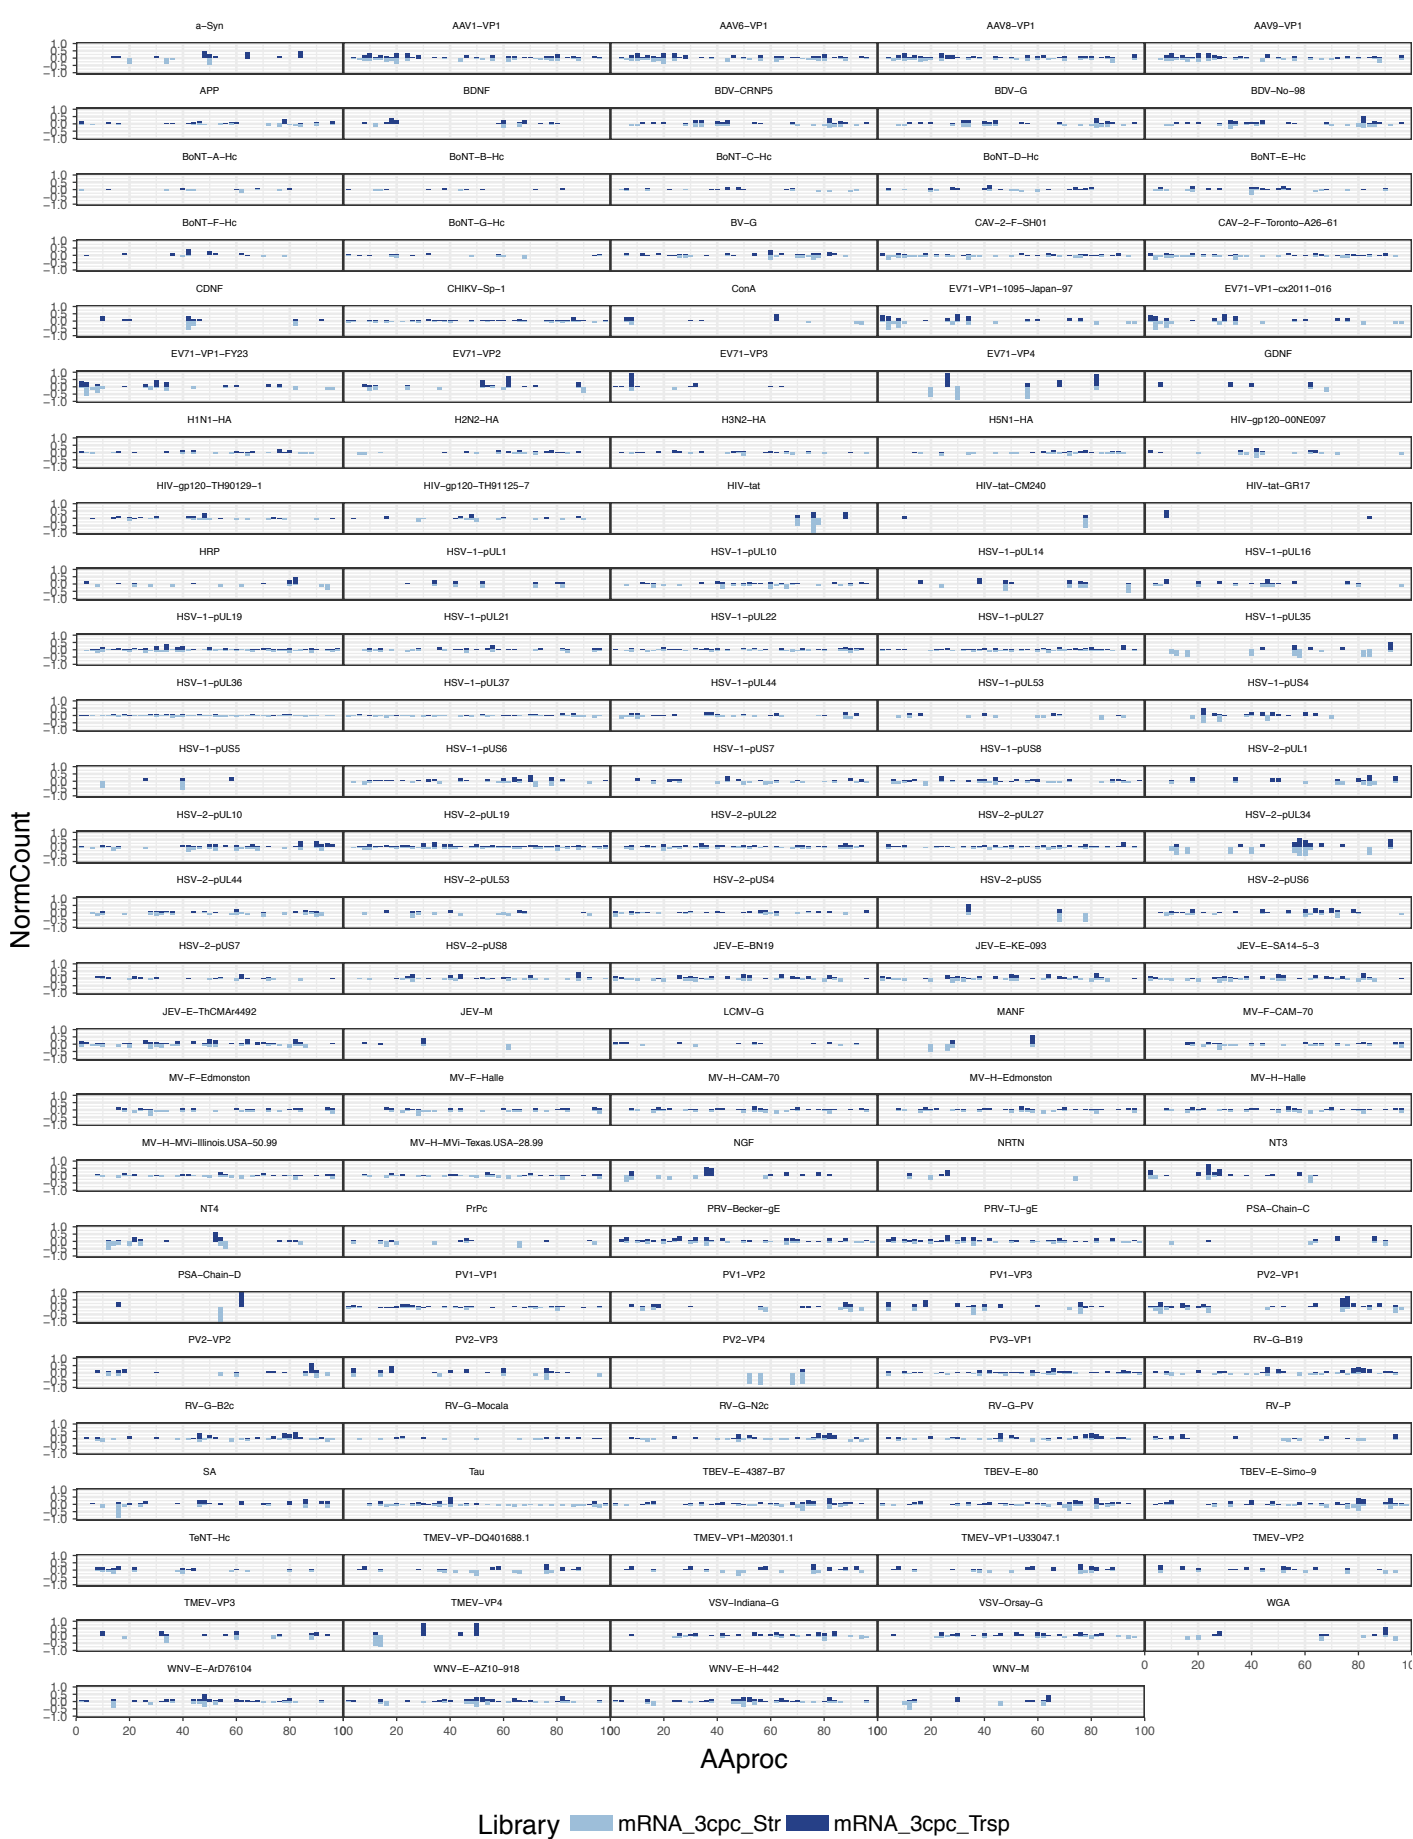

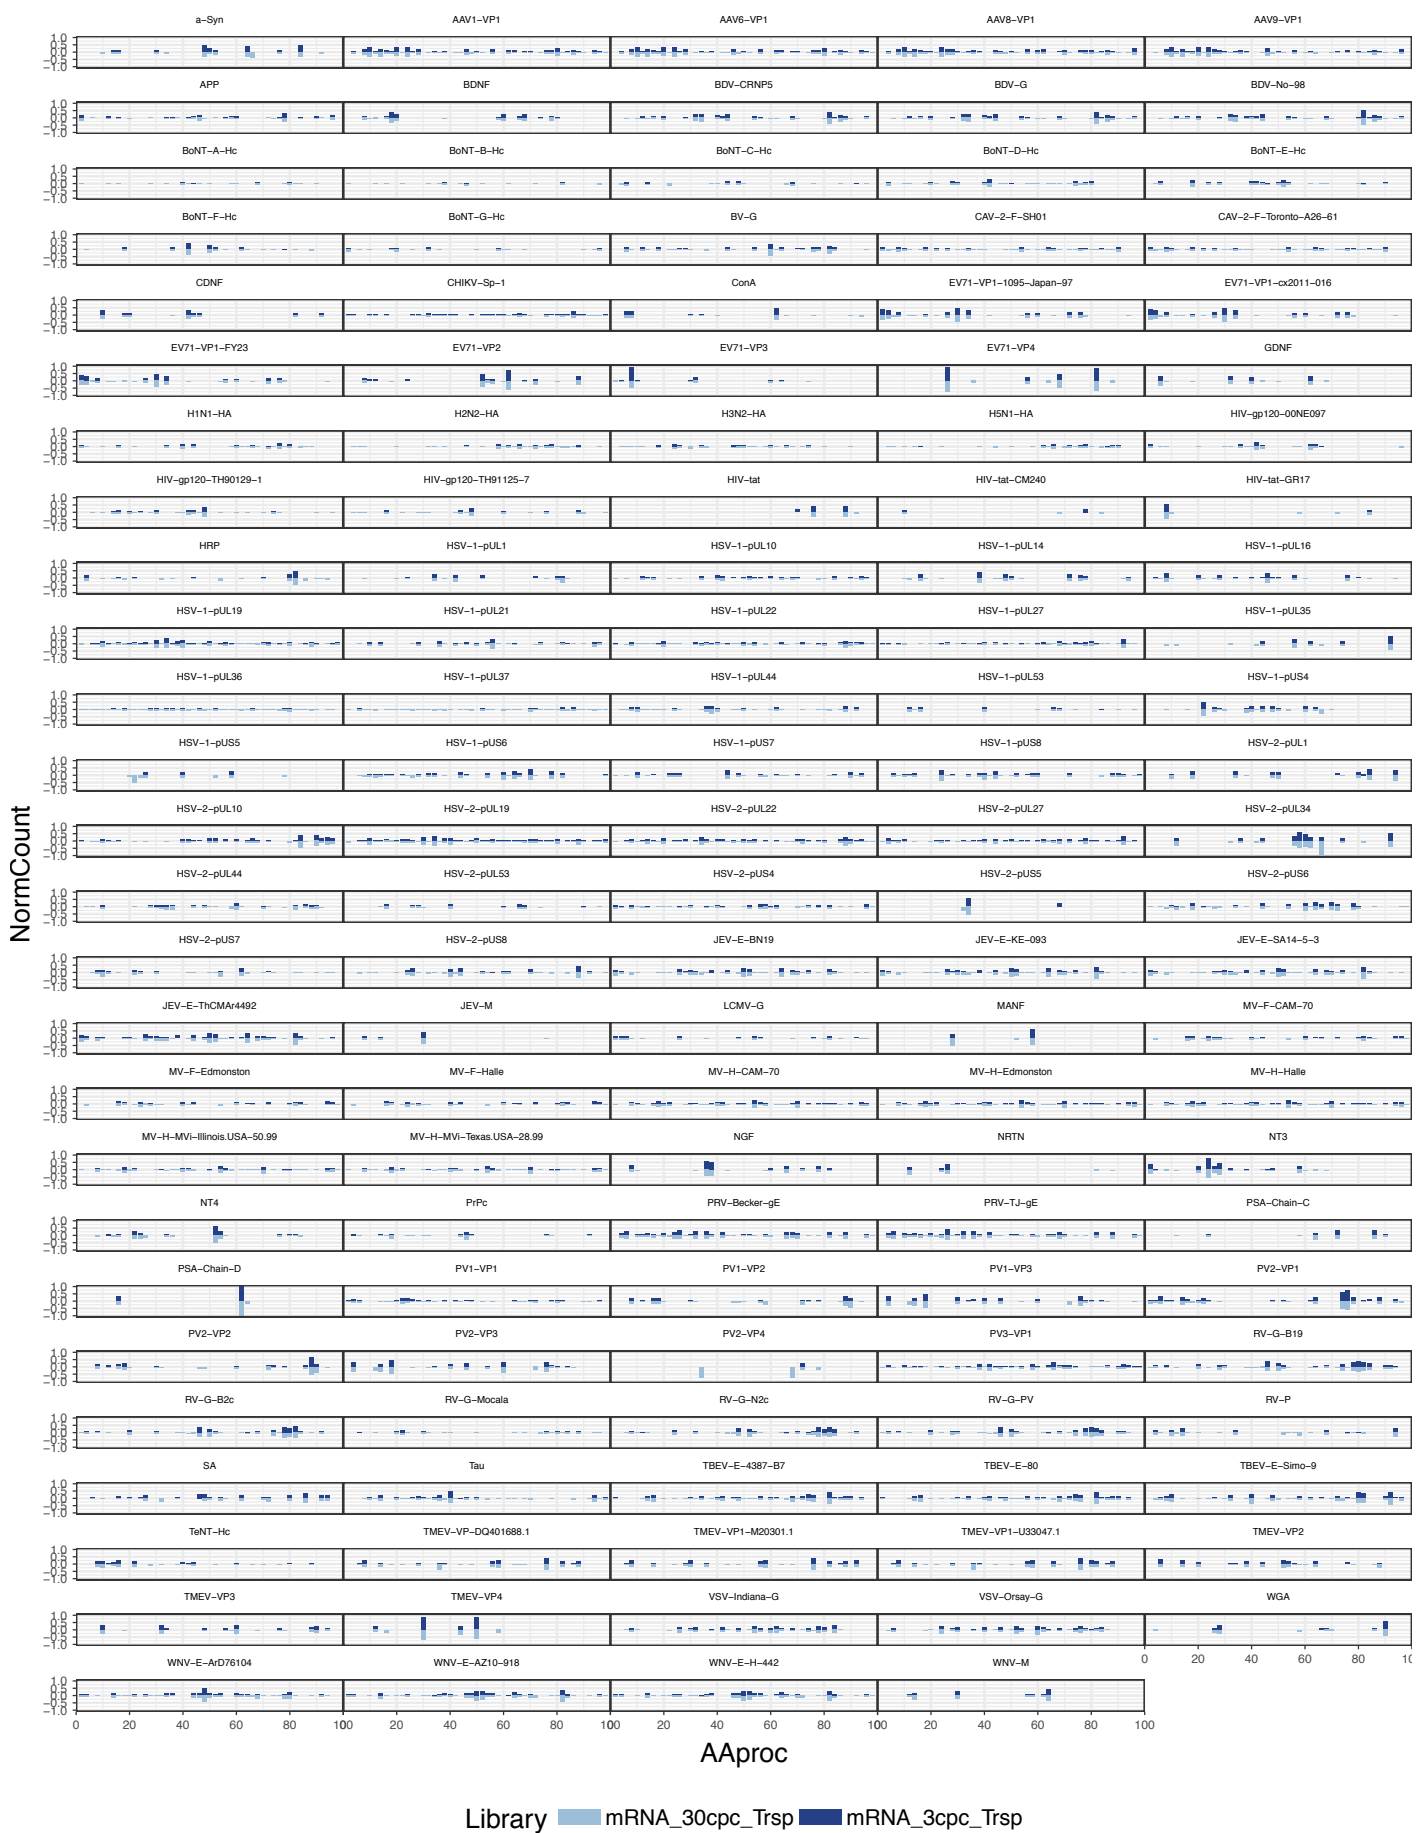

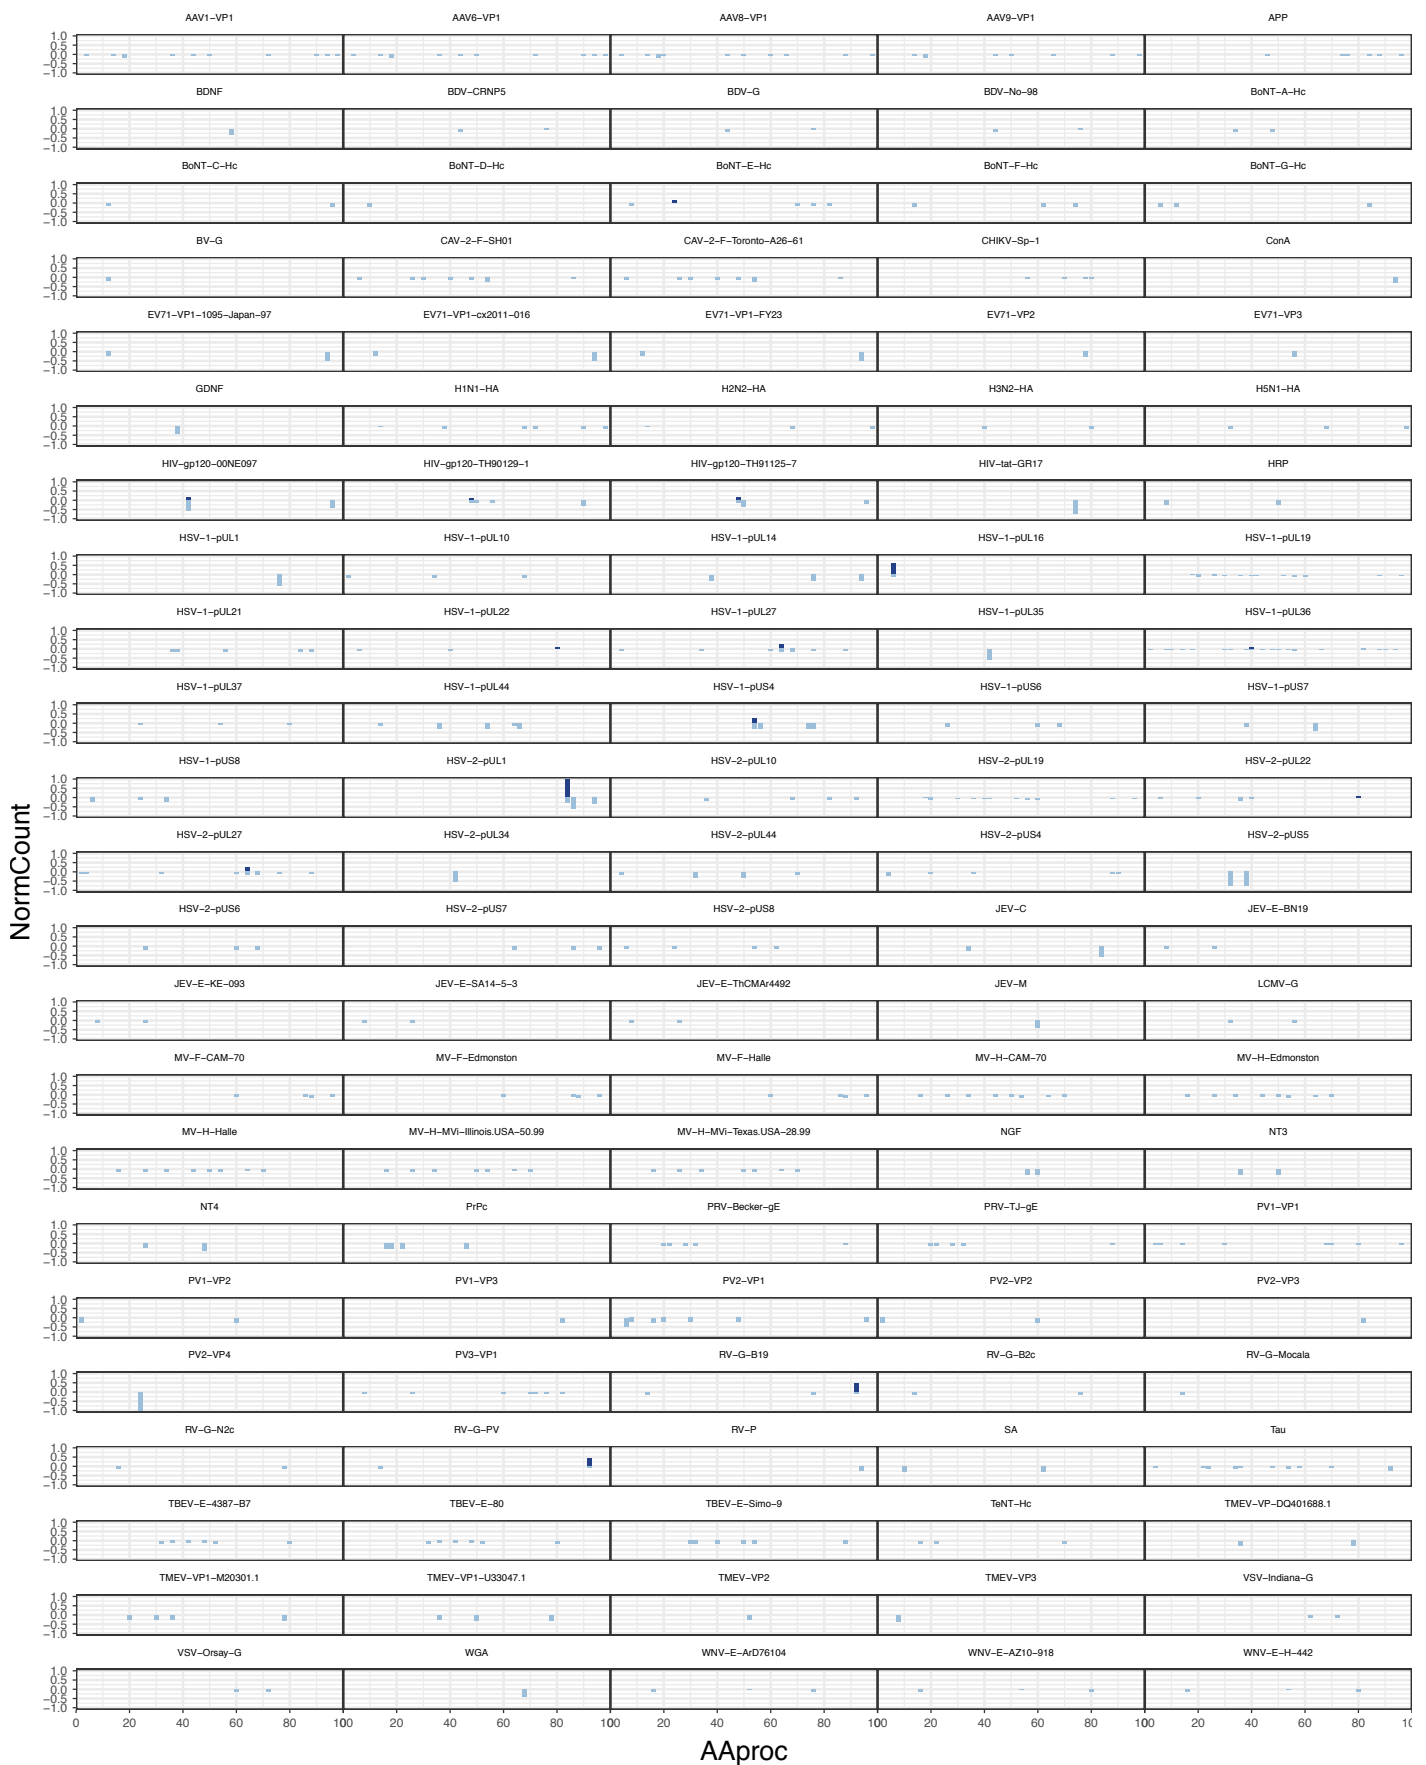

Library ■ mRNA\_30cpc\_pNeuron ■ mRNA\_3cpc\_pNeuron

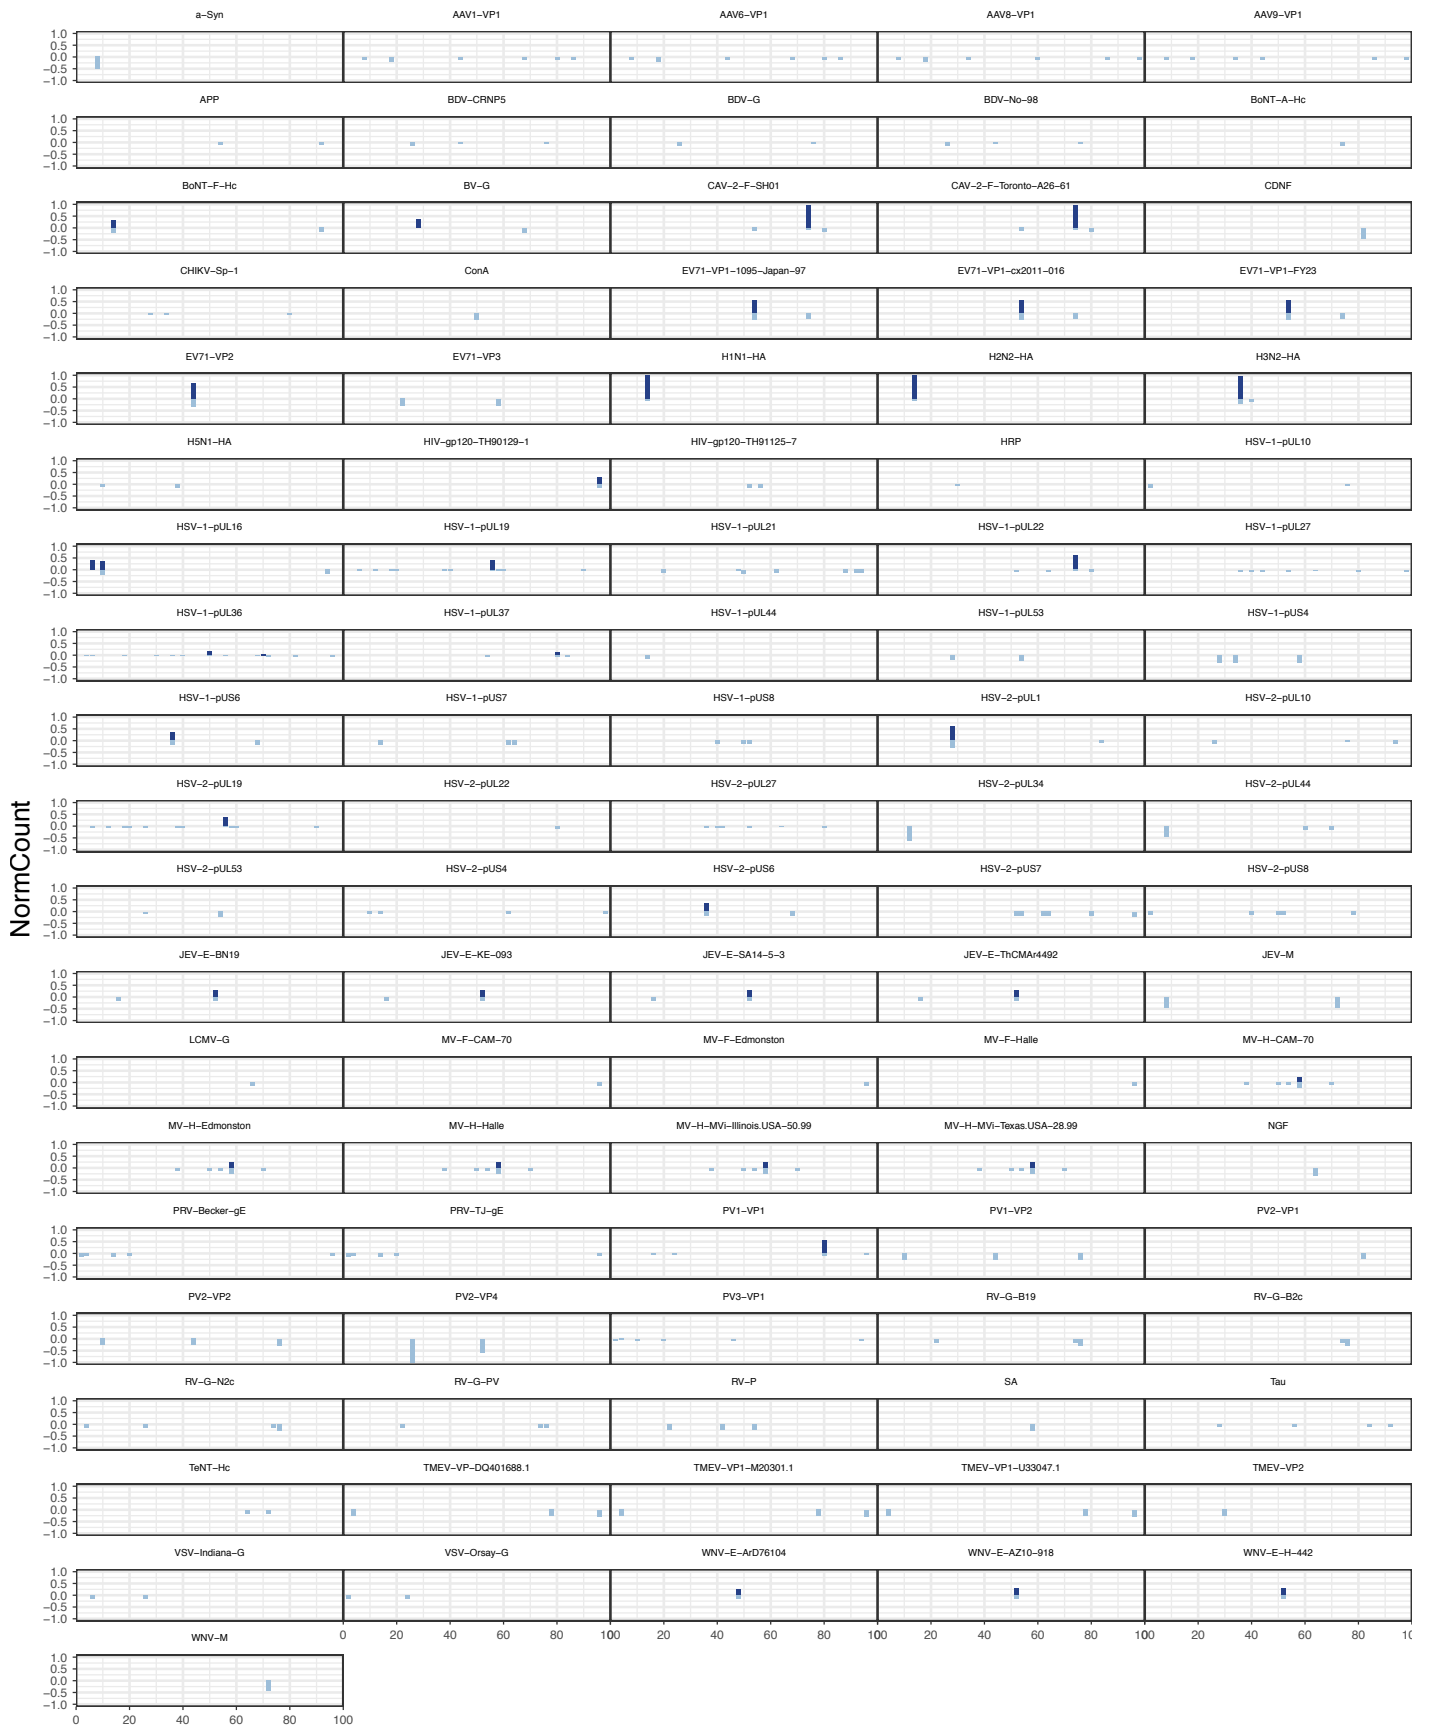

Aaproc

Library ■ mRNA\_30cpc\_HEK293T ■ mRNA\_3cpc\_HEK293T

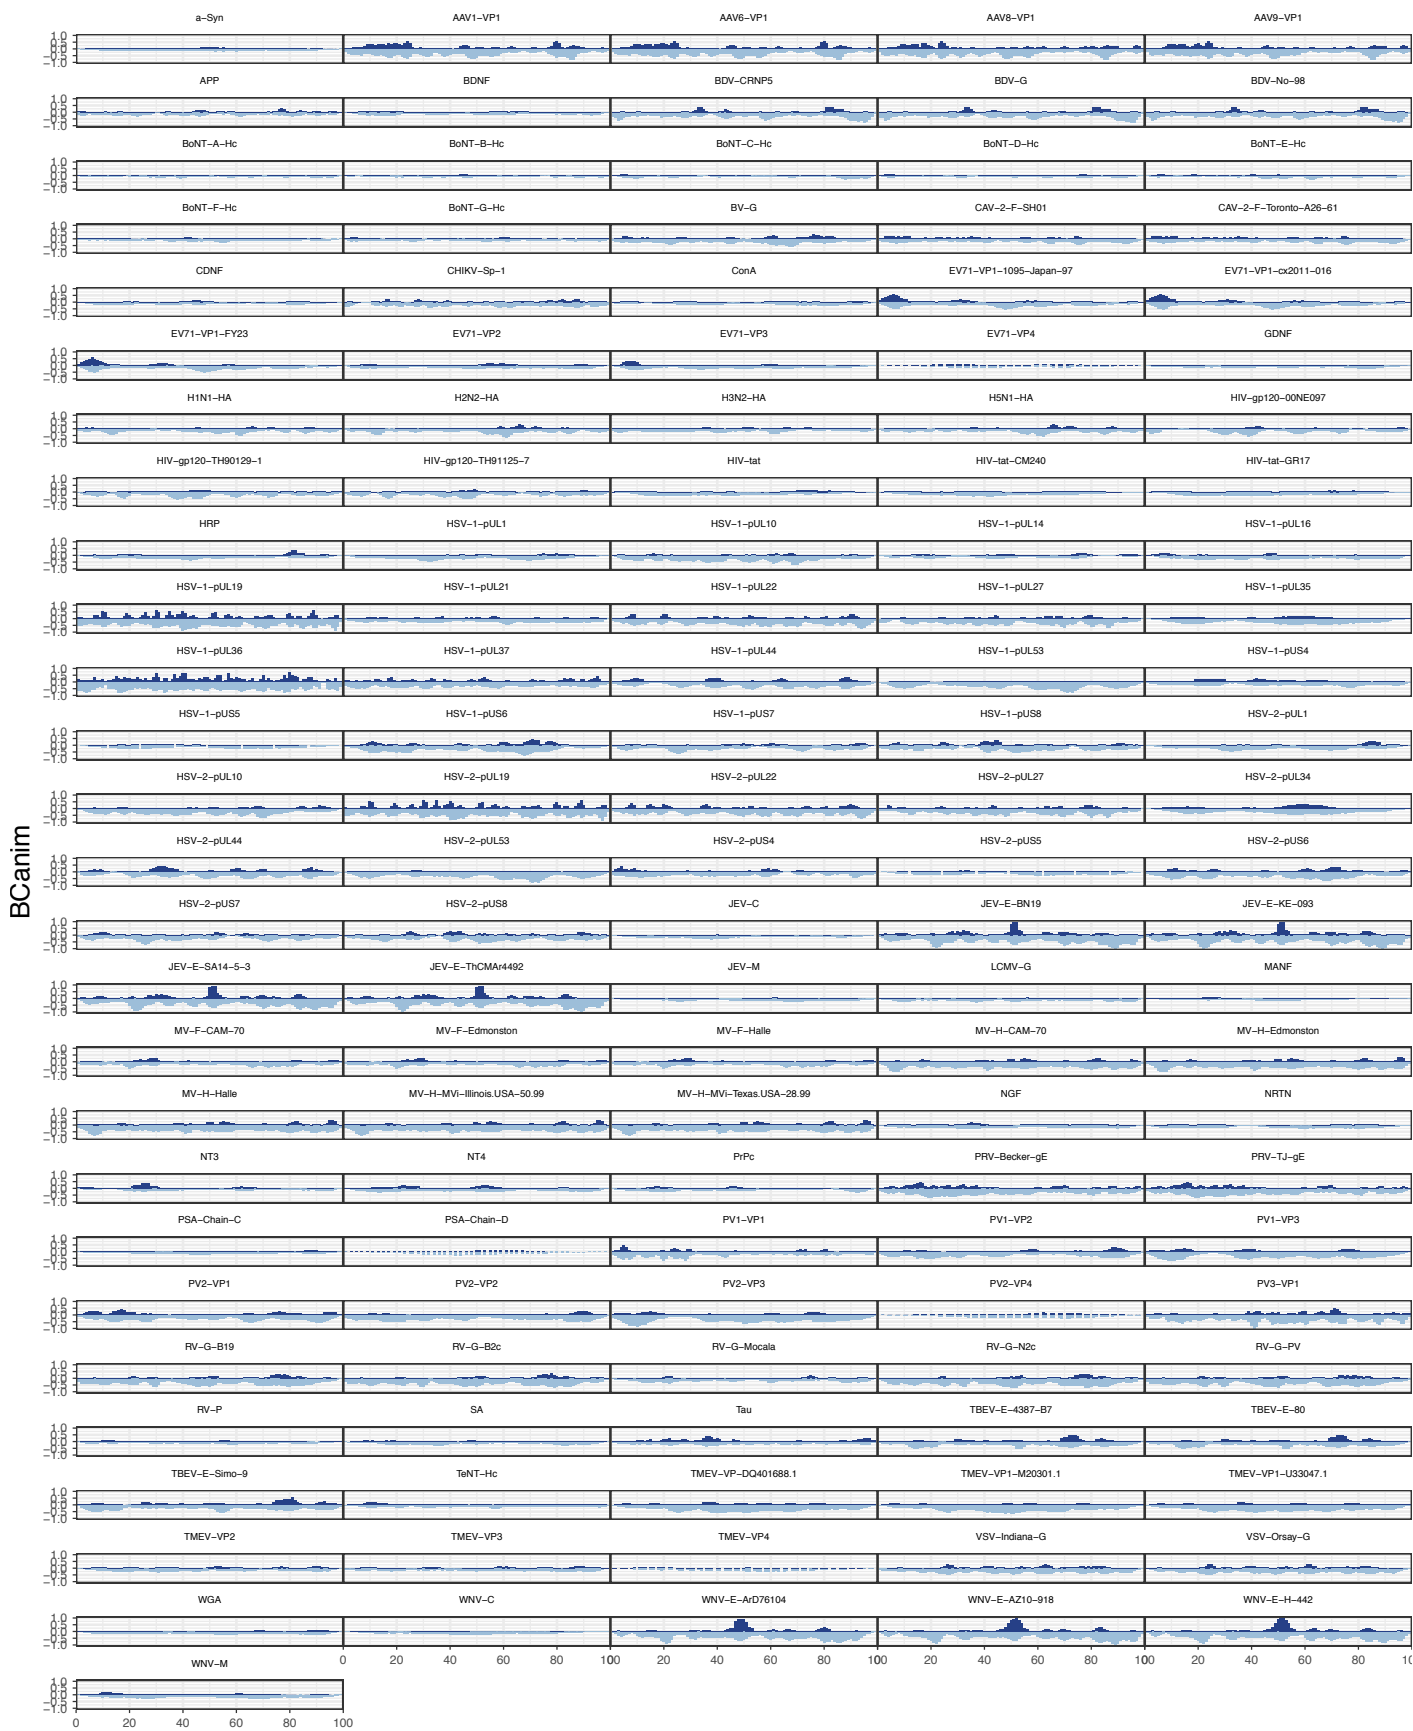

Aapro

Library DNA\_pscAAVlib mRNA\_All

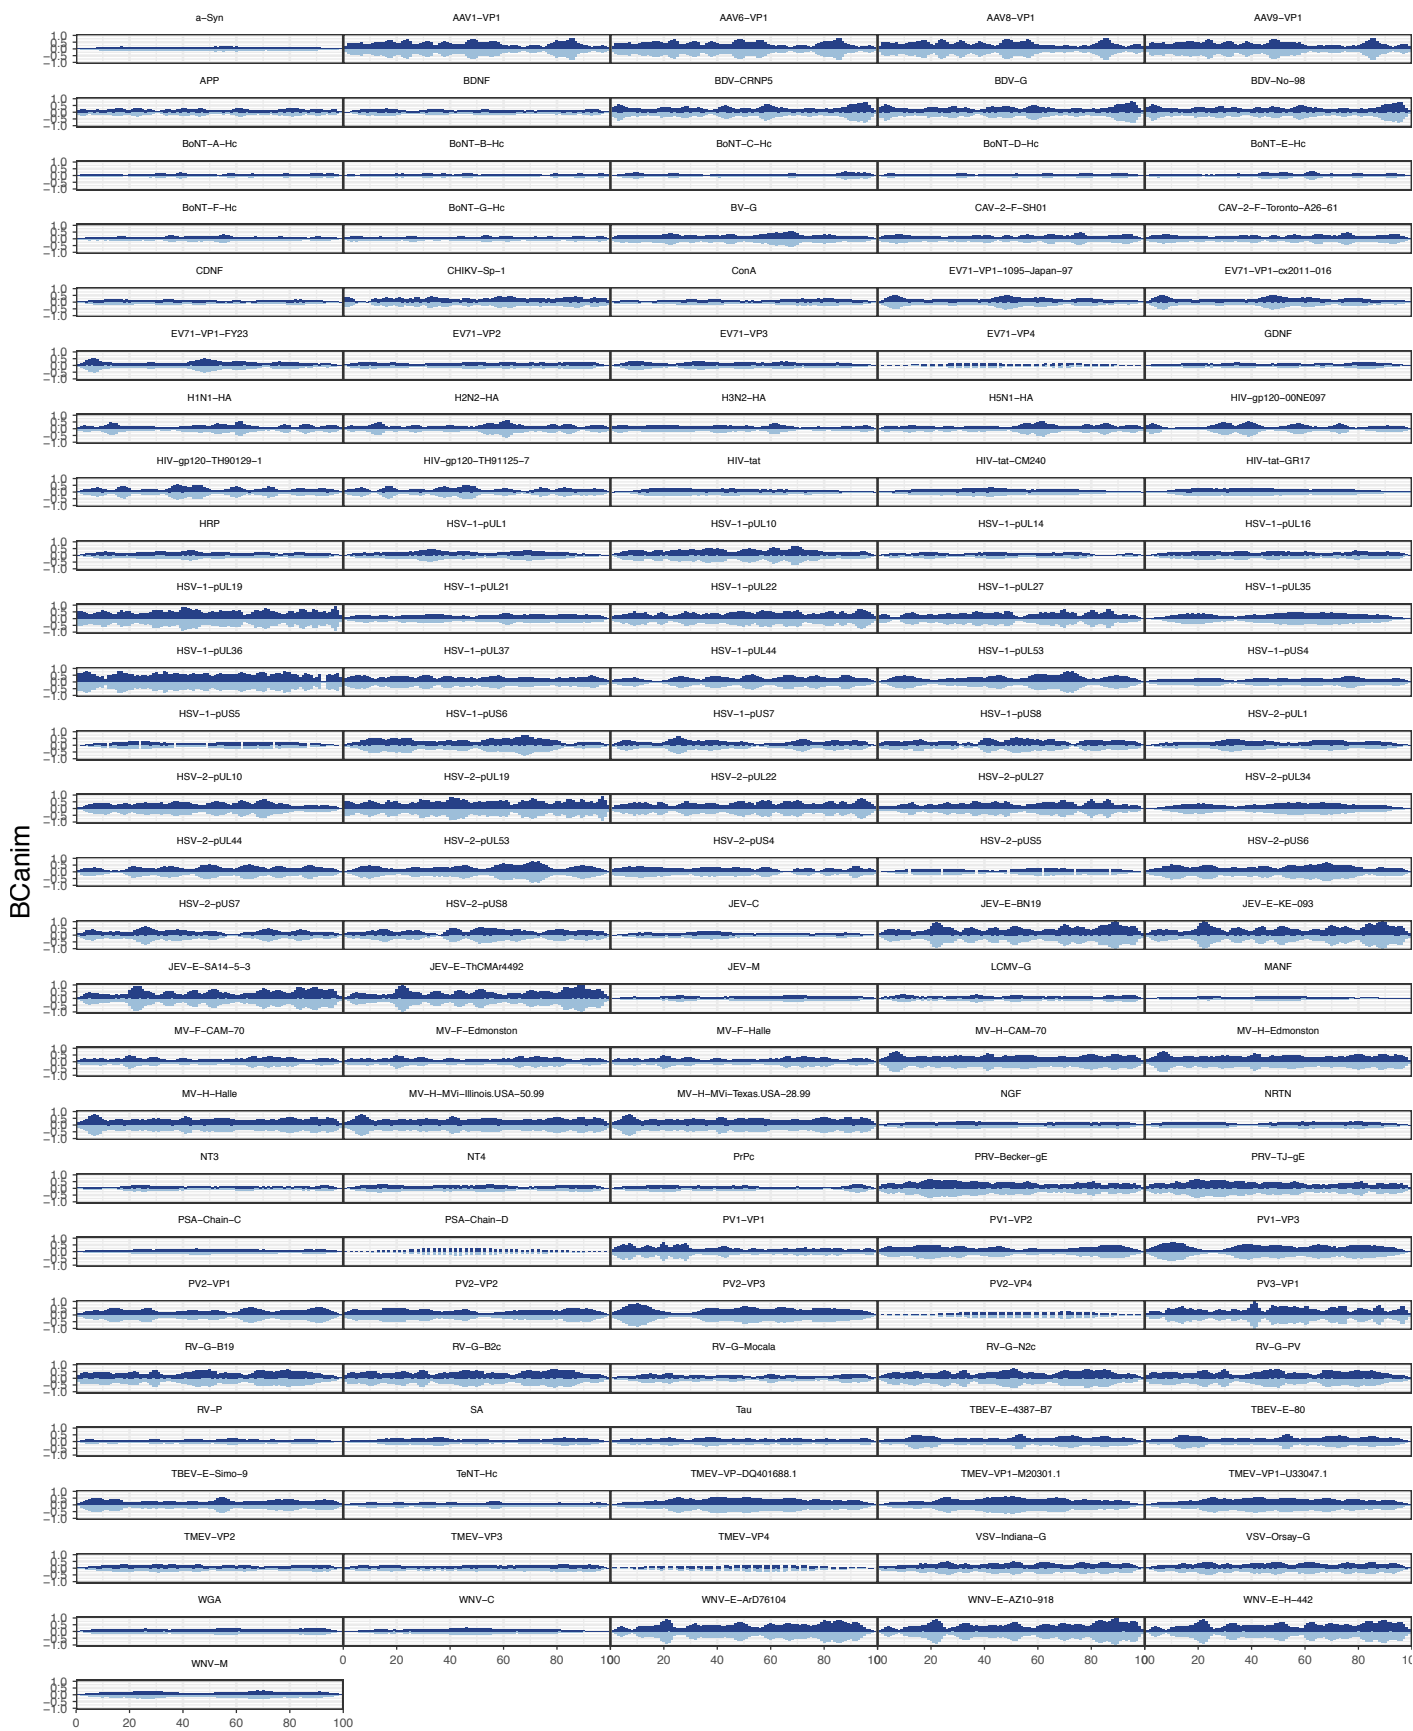

Aaproc

Library ■ DNA\_pscAAVlib ■ DNA\_pscAAVlib\_Prep2

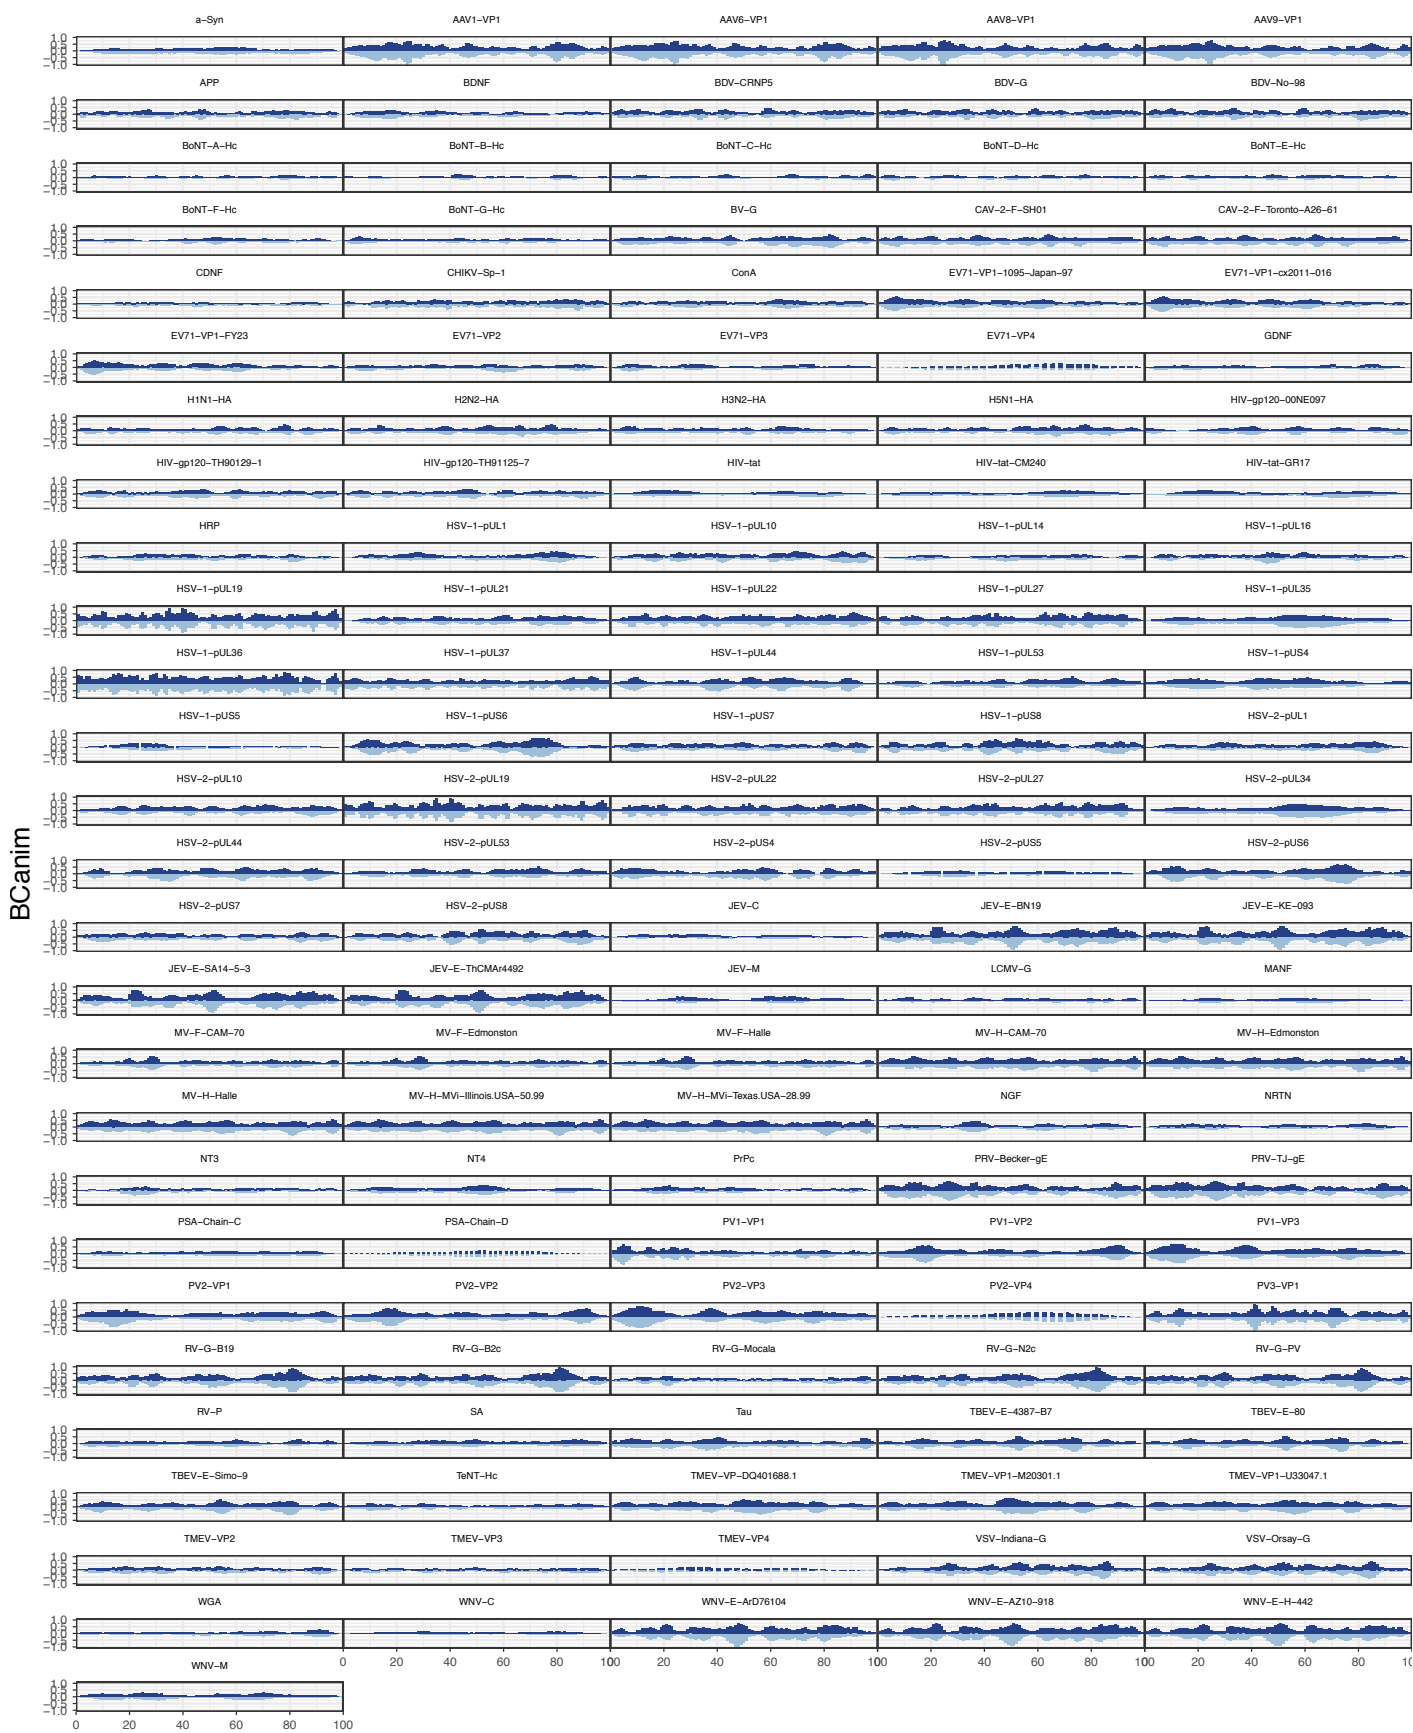

Aaproc

Library ■ DNA\_AAVlib\_DNase\_30cpc ■ DNA\_AAVlib\_DNase\_3cpc

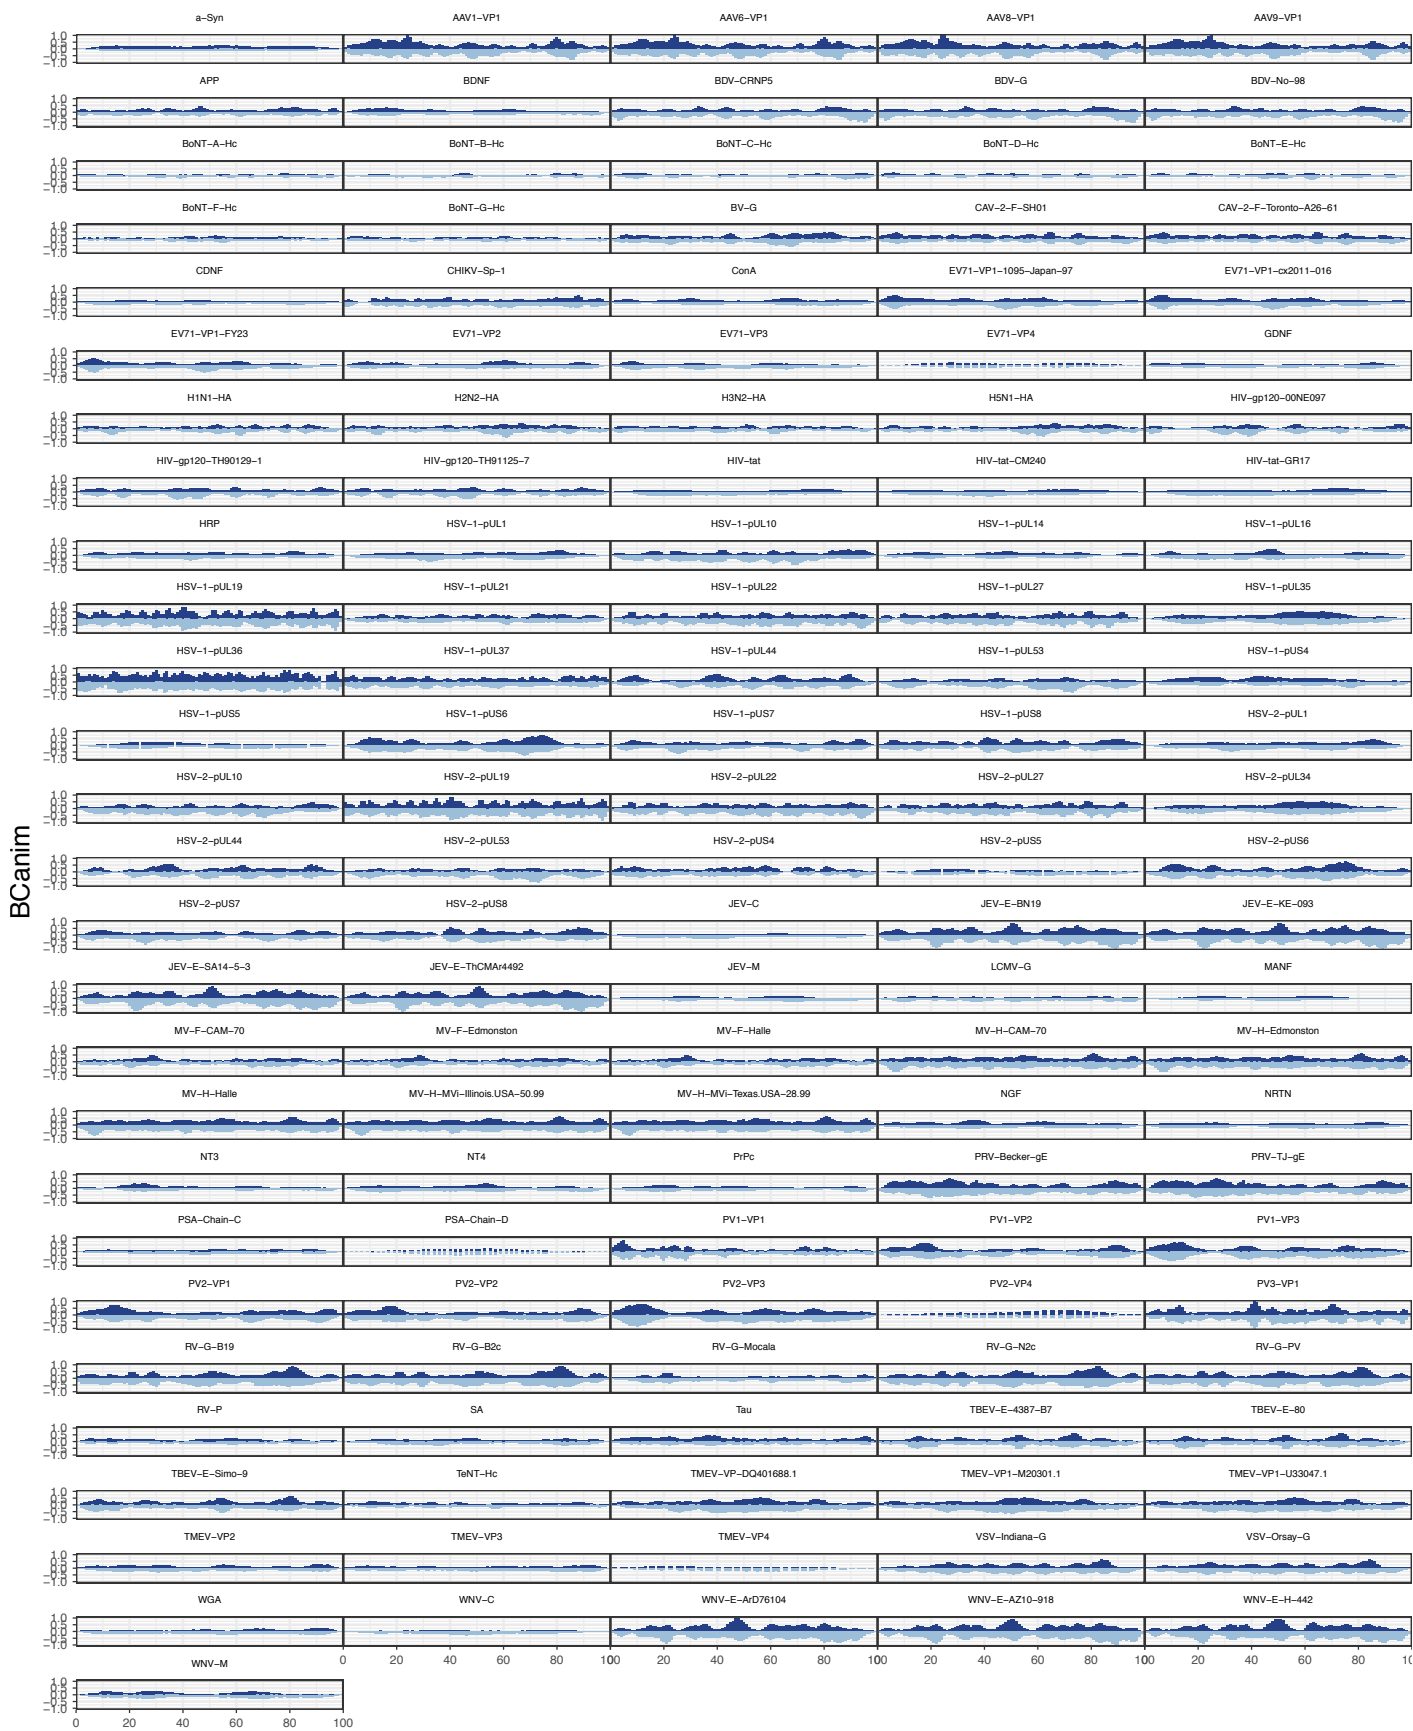

Aaproc

Library ■ DNA\_AAVlib\_DNase\_30cpc ■ DNA\_pscAAVlib\_Prep2



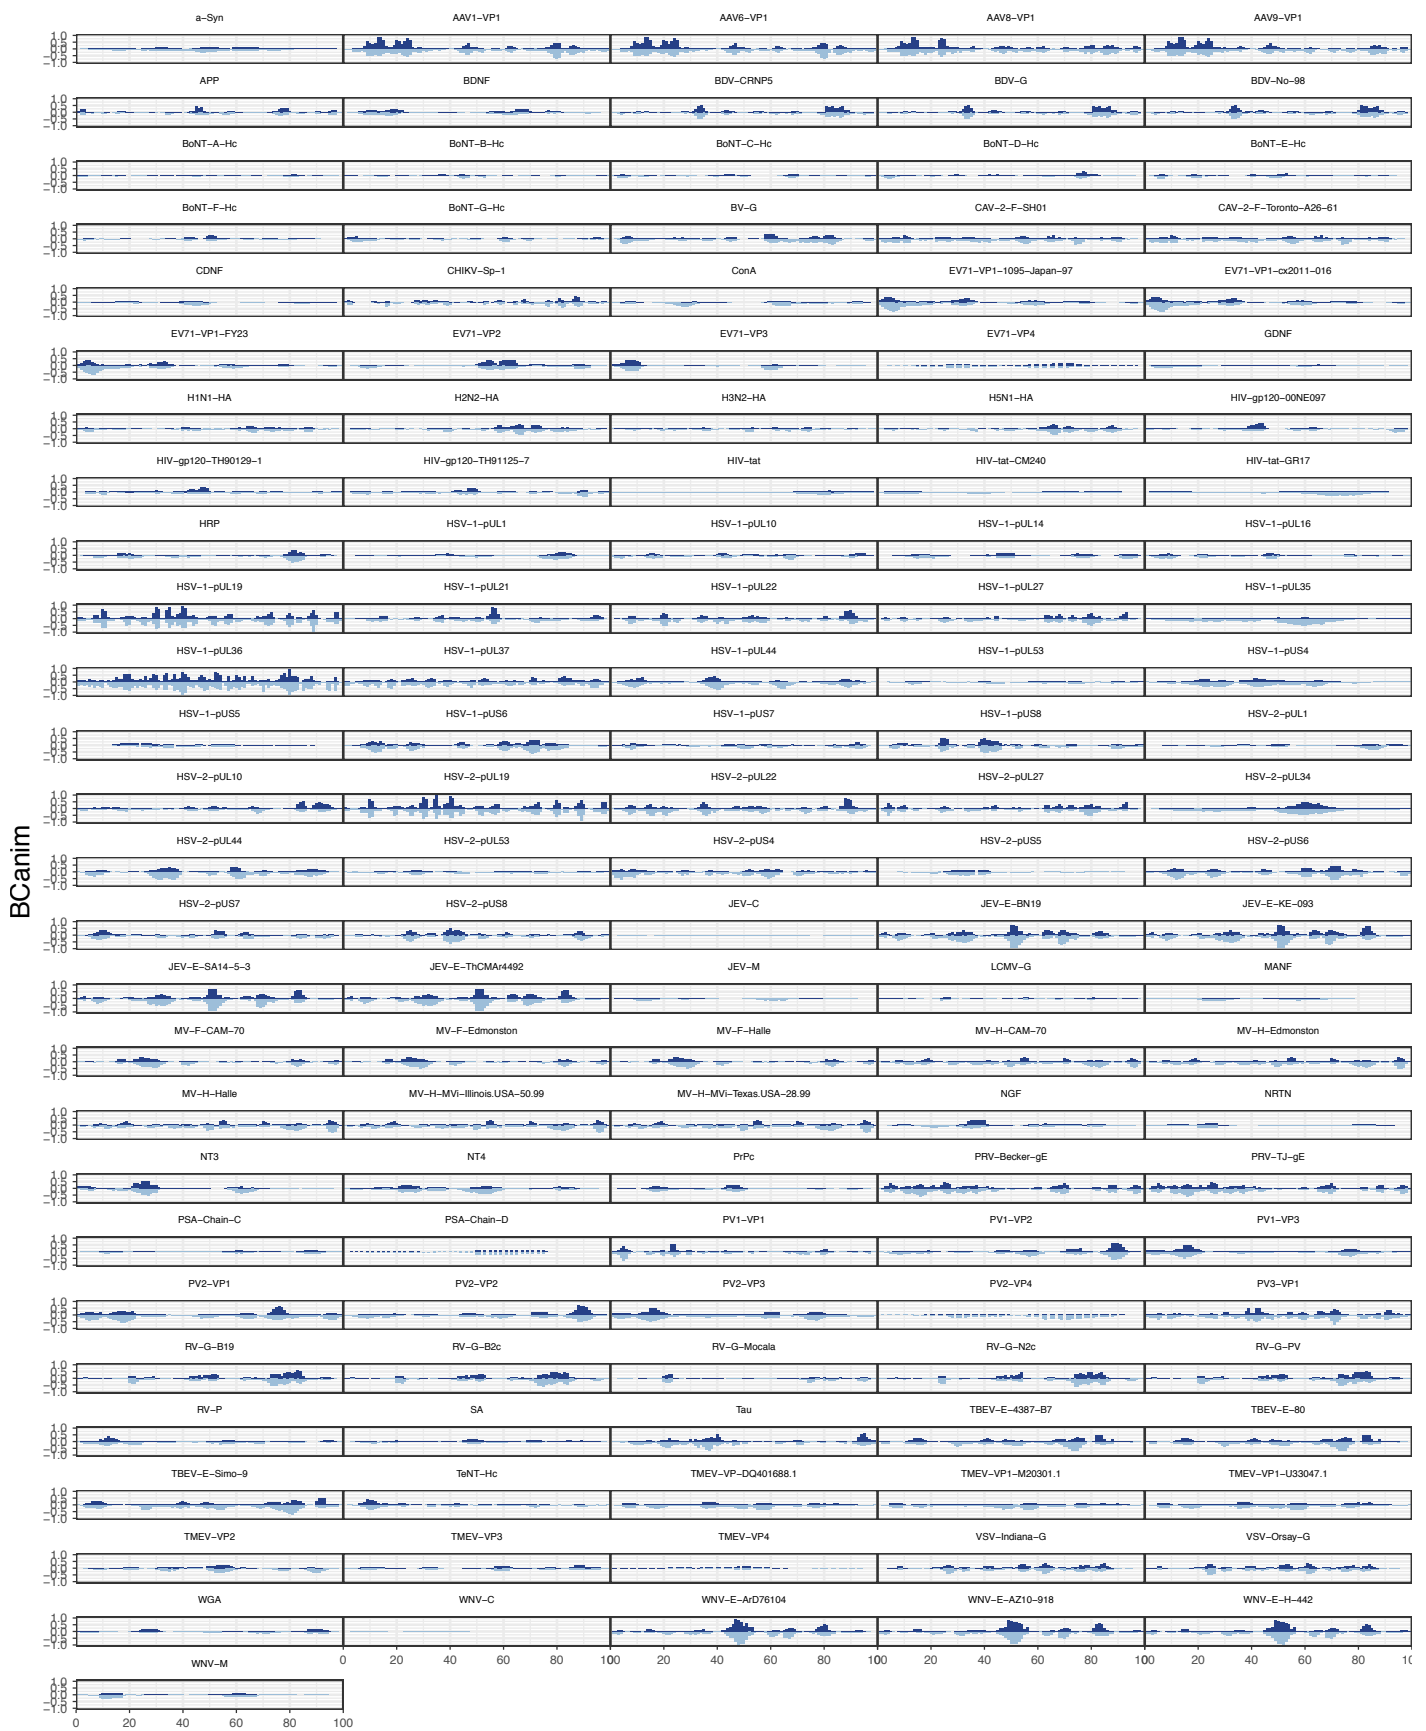

Aaproc

Library mRNA\_30cpc\_Str mRNA\_30cpc\_Trsp

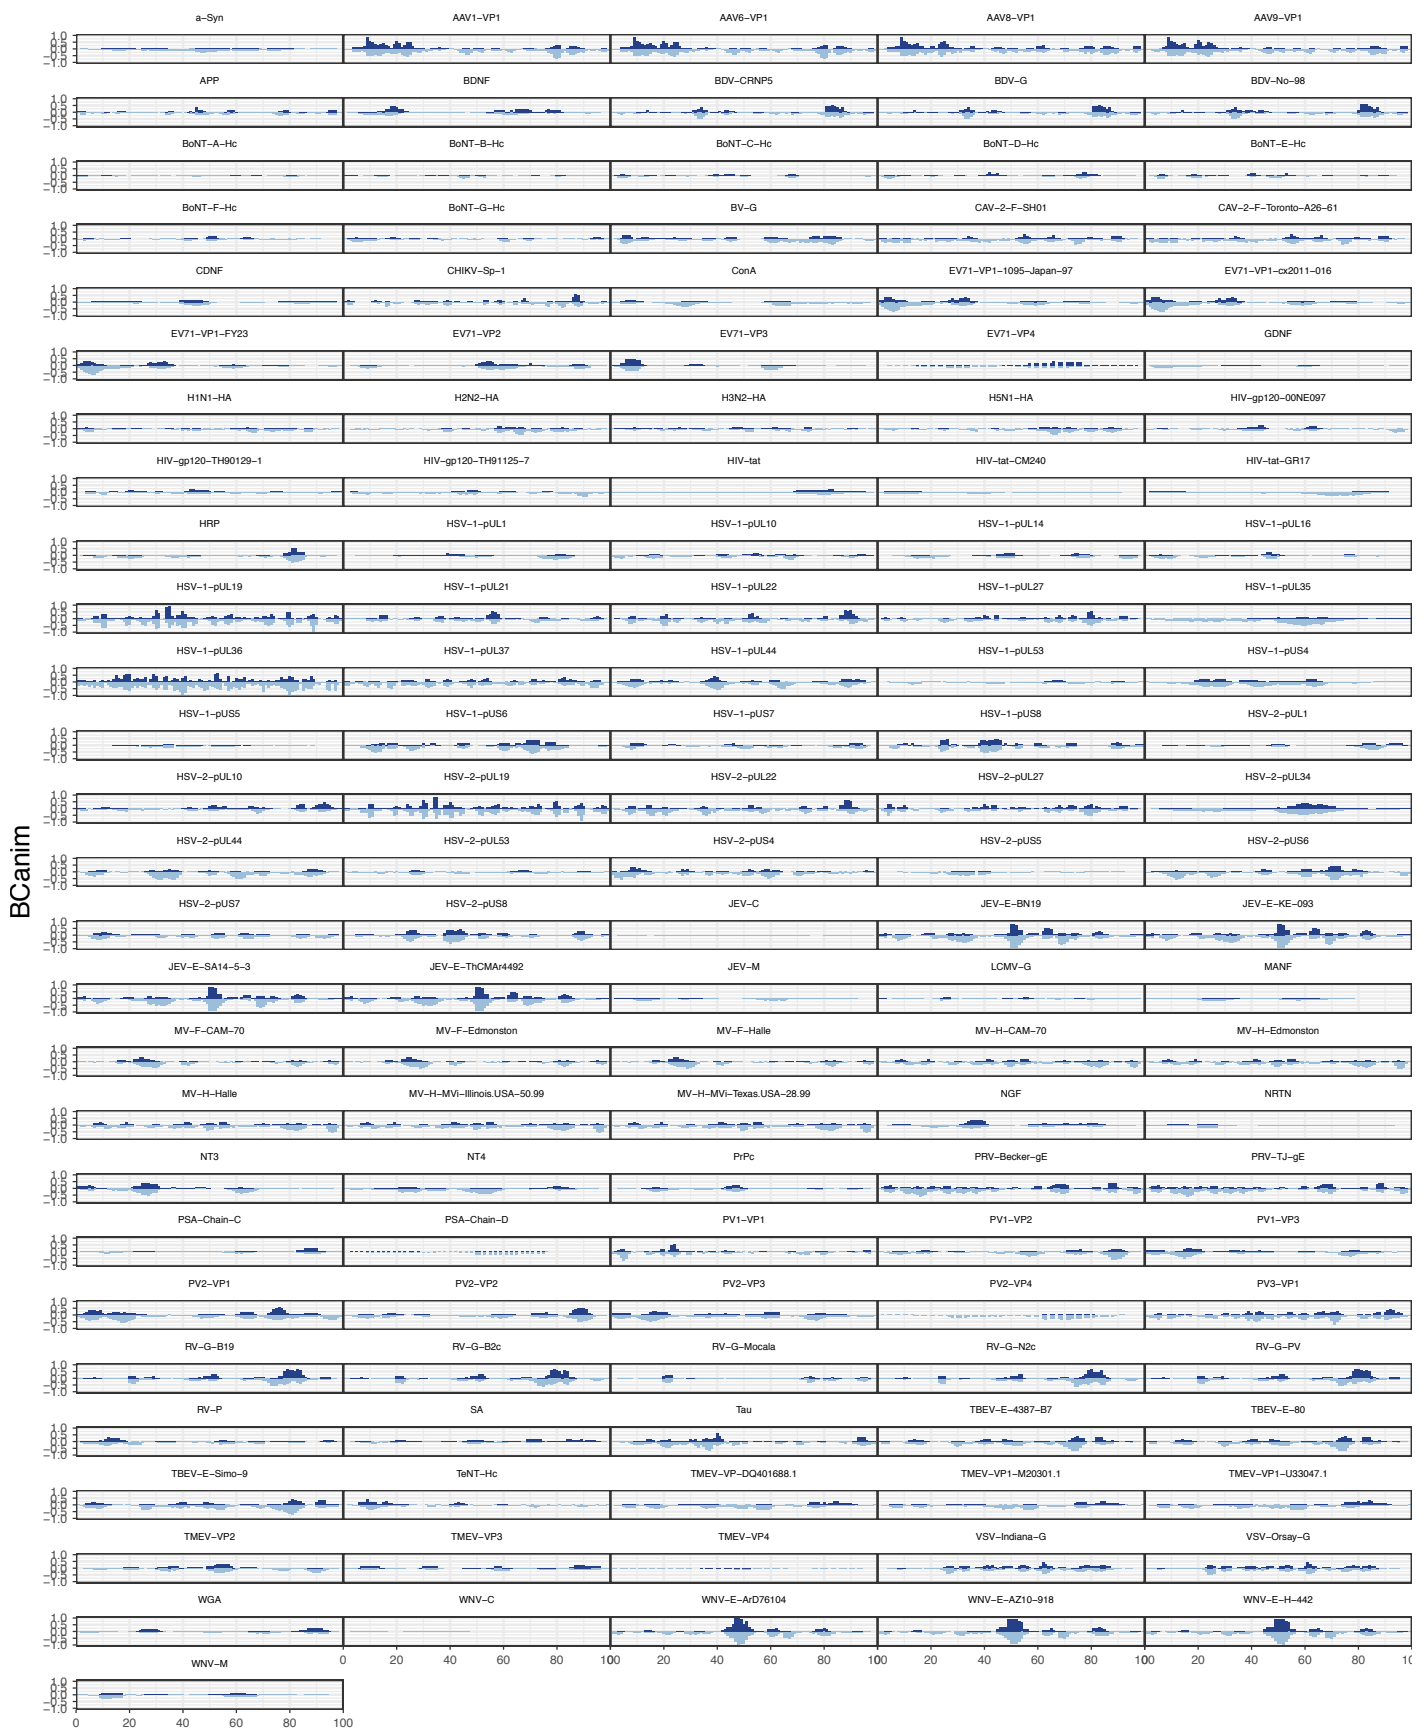

Aaproc

Library ■ mRNA\_30cpc\_Str ■ mRNA\_30cpc\_Th

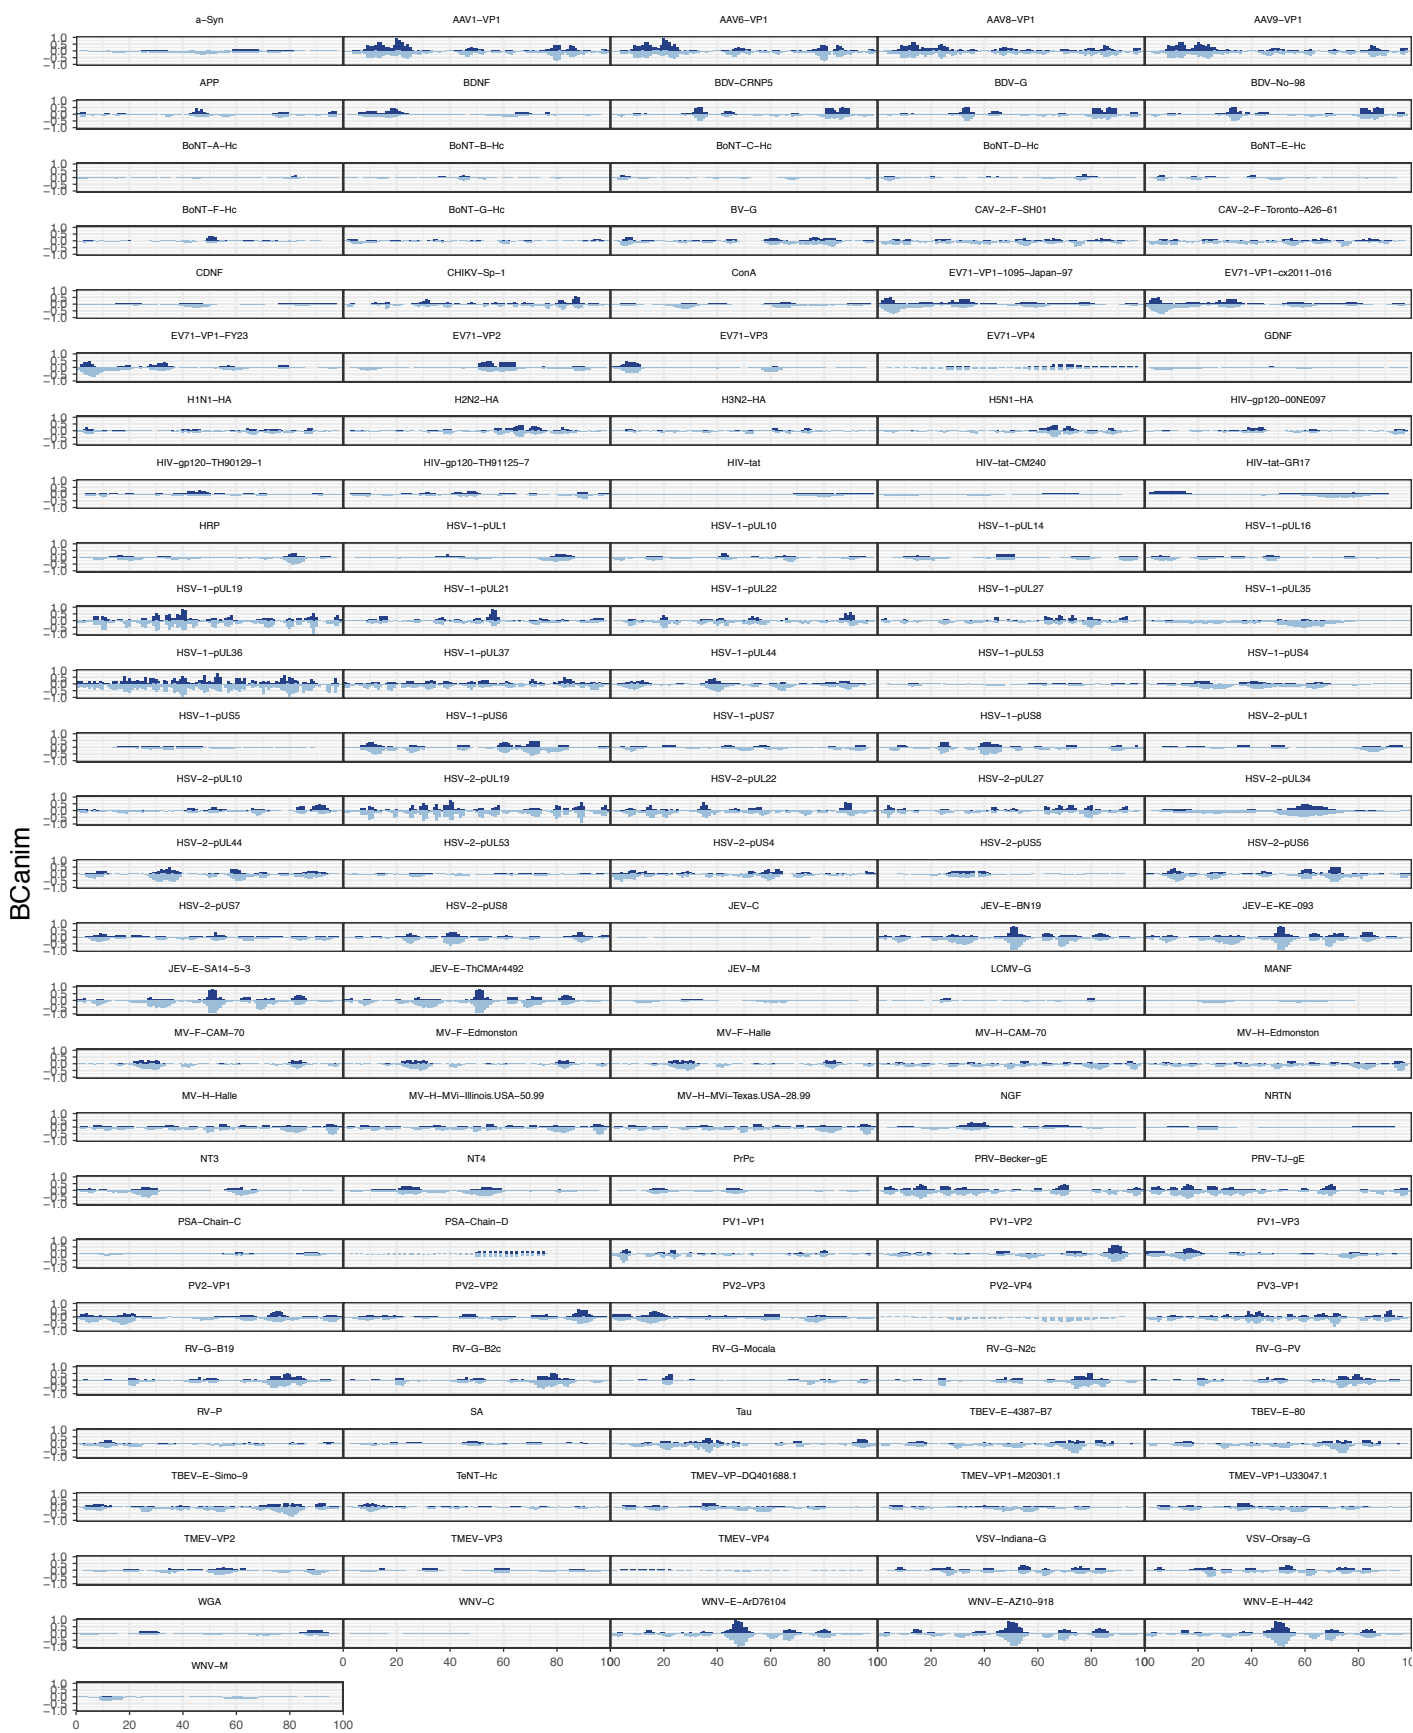

Aaproc

Library ■ mRNA\_30cpc\_Ctx ■ mRNA\_30cpc\_Str

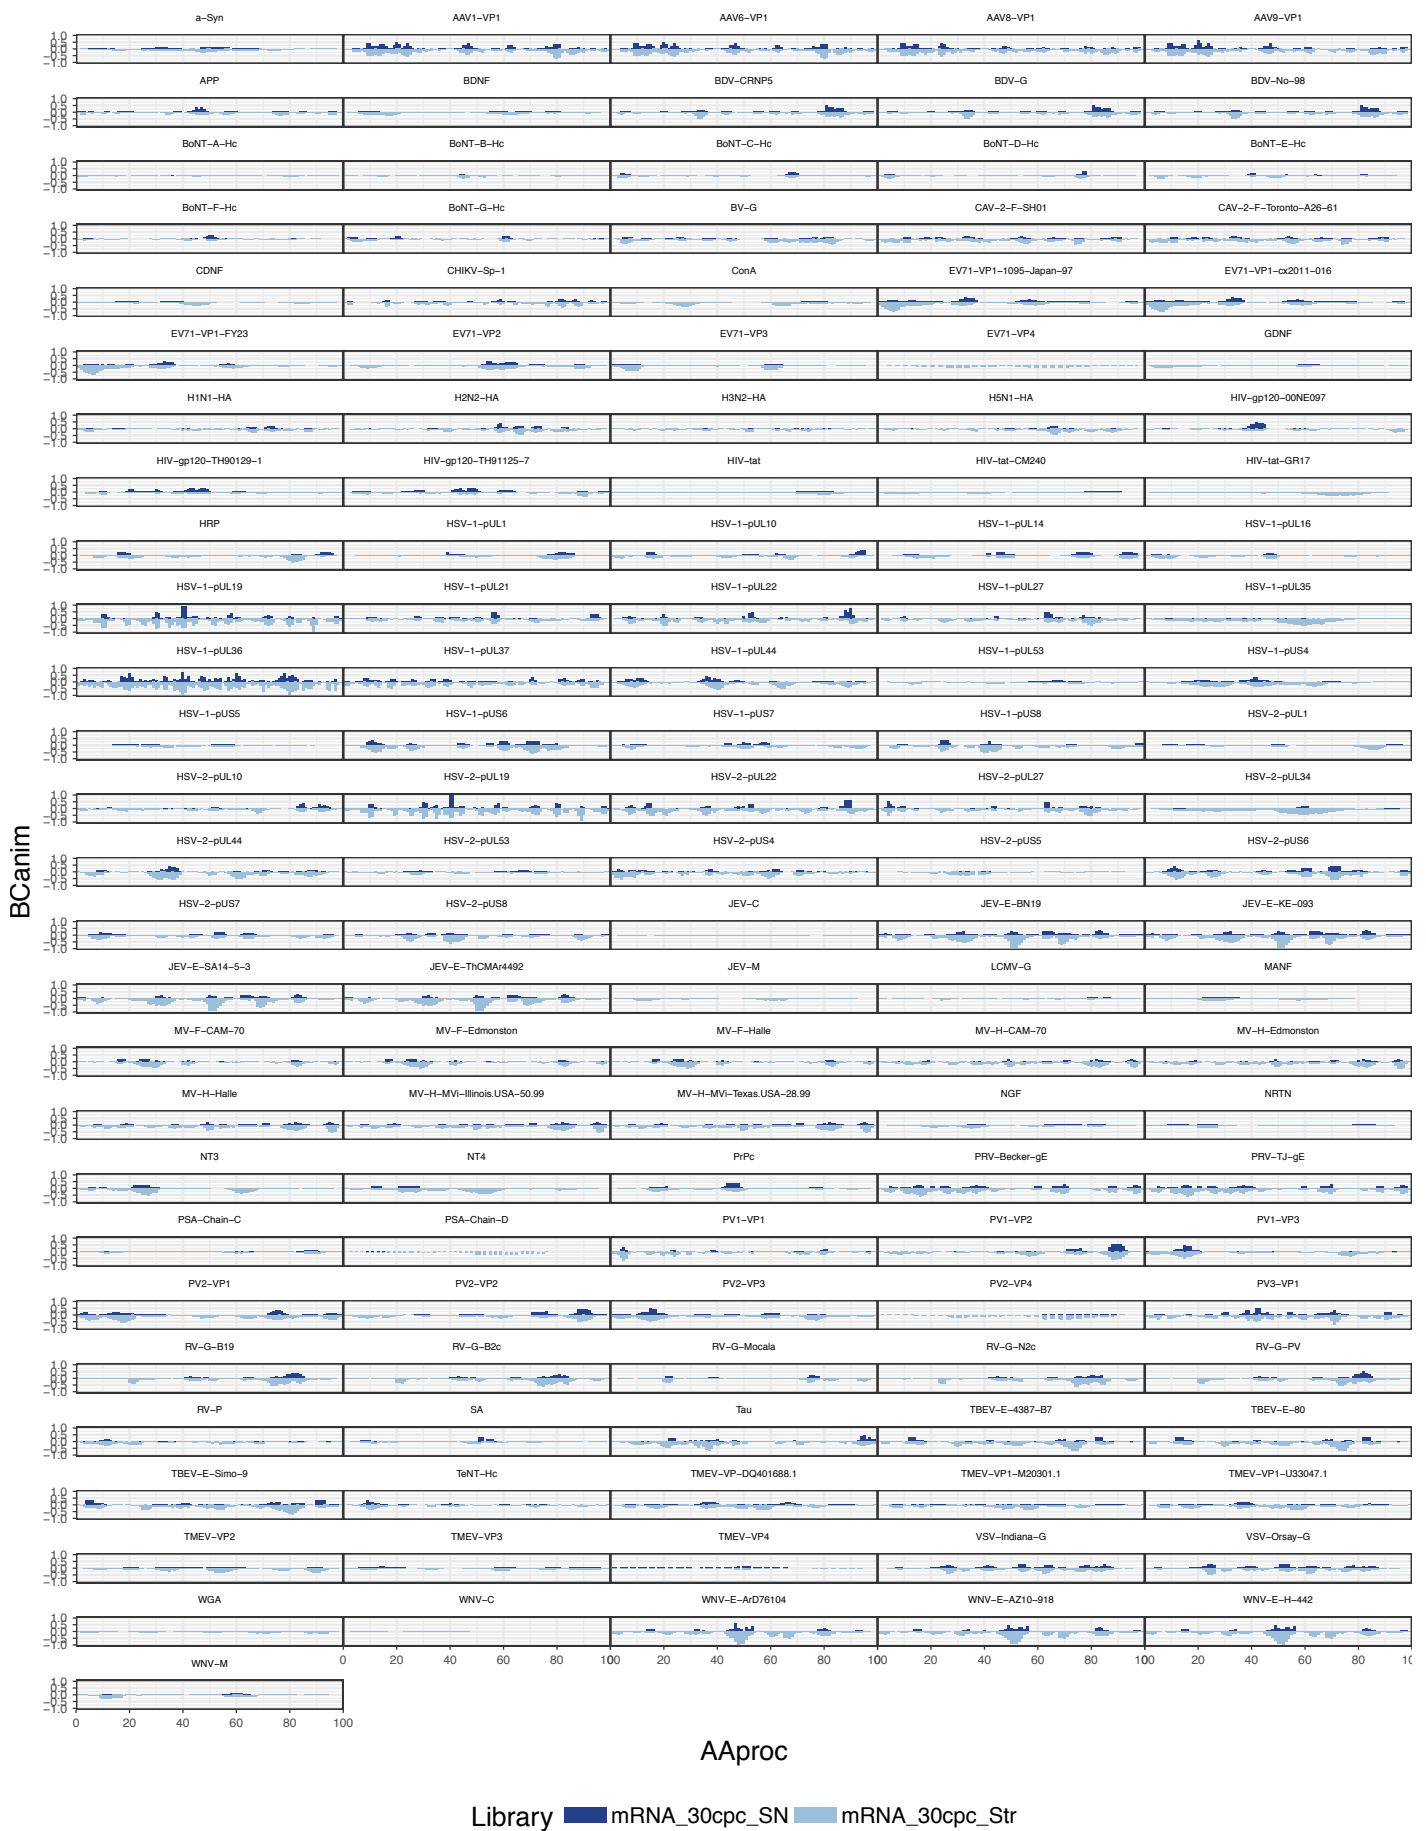

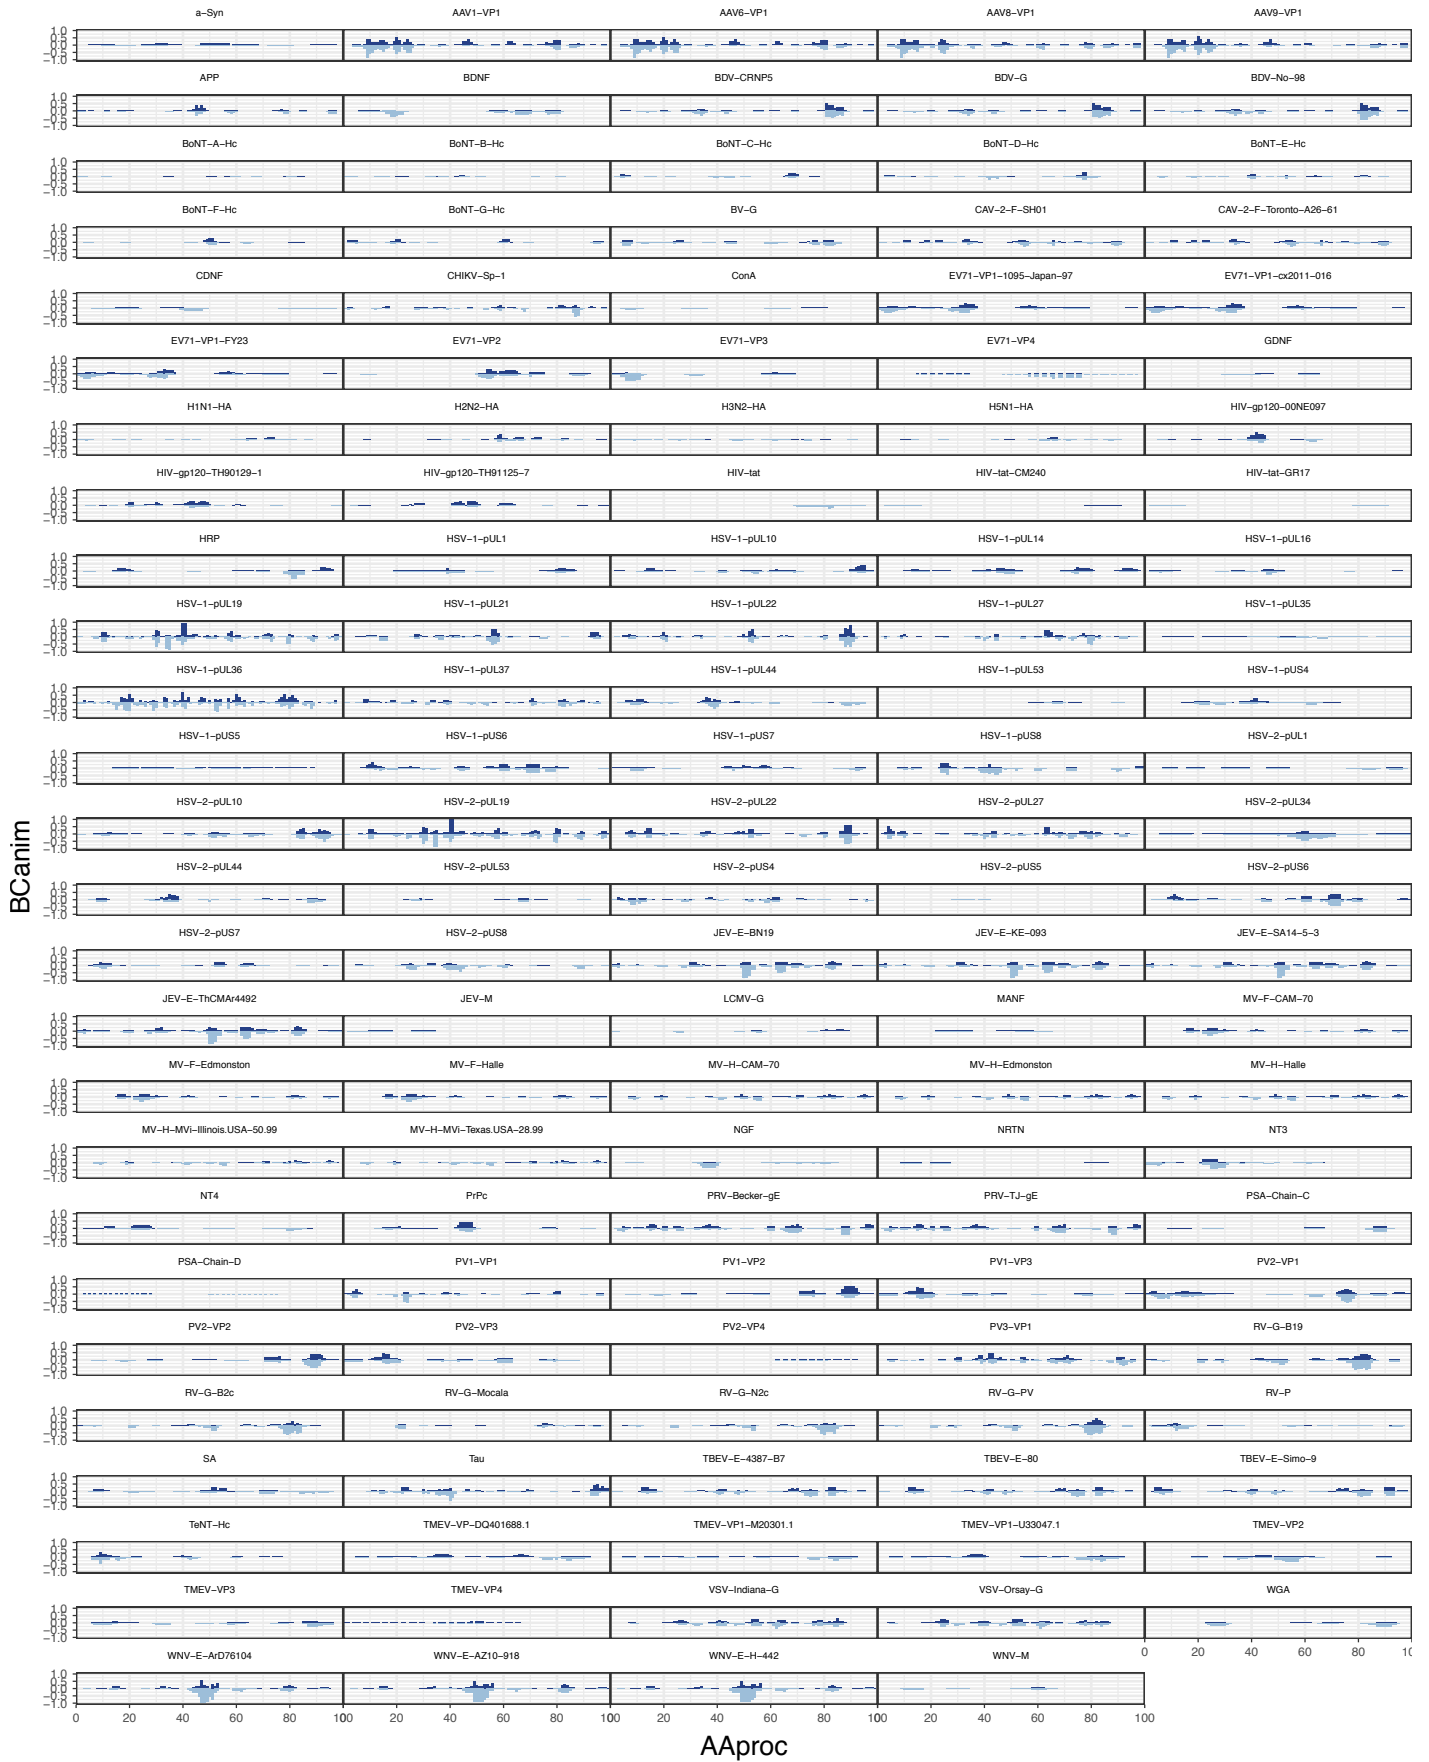

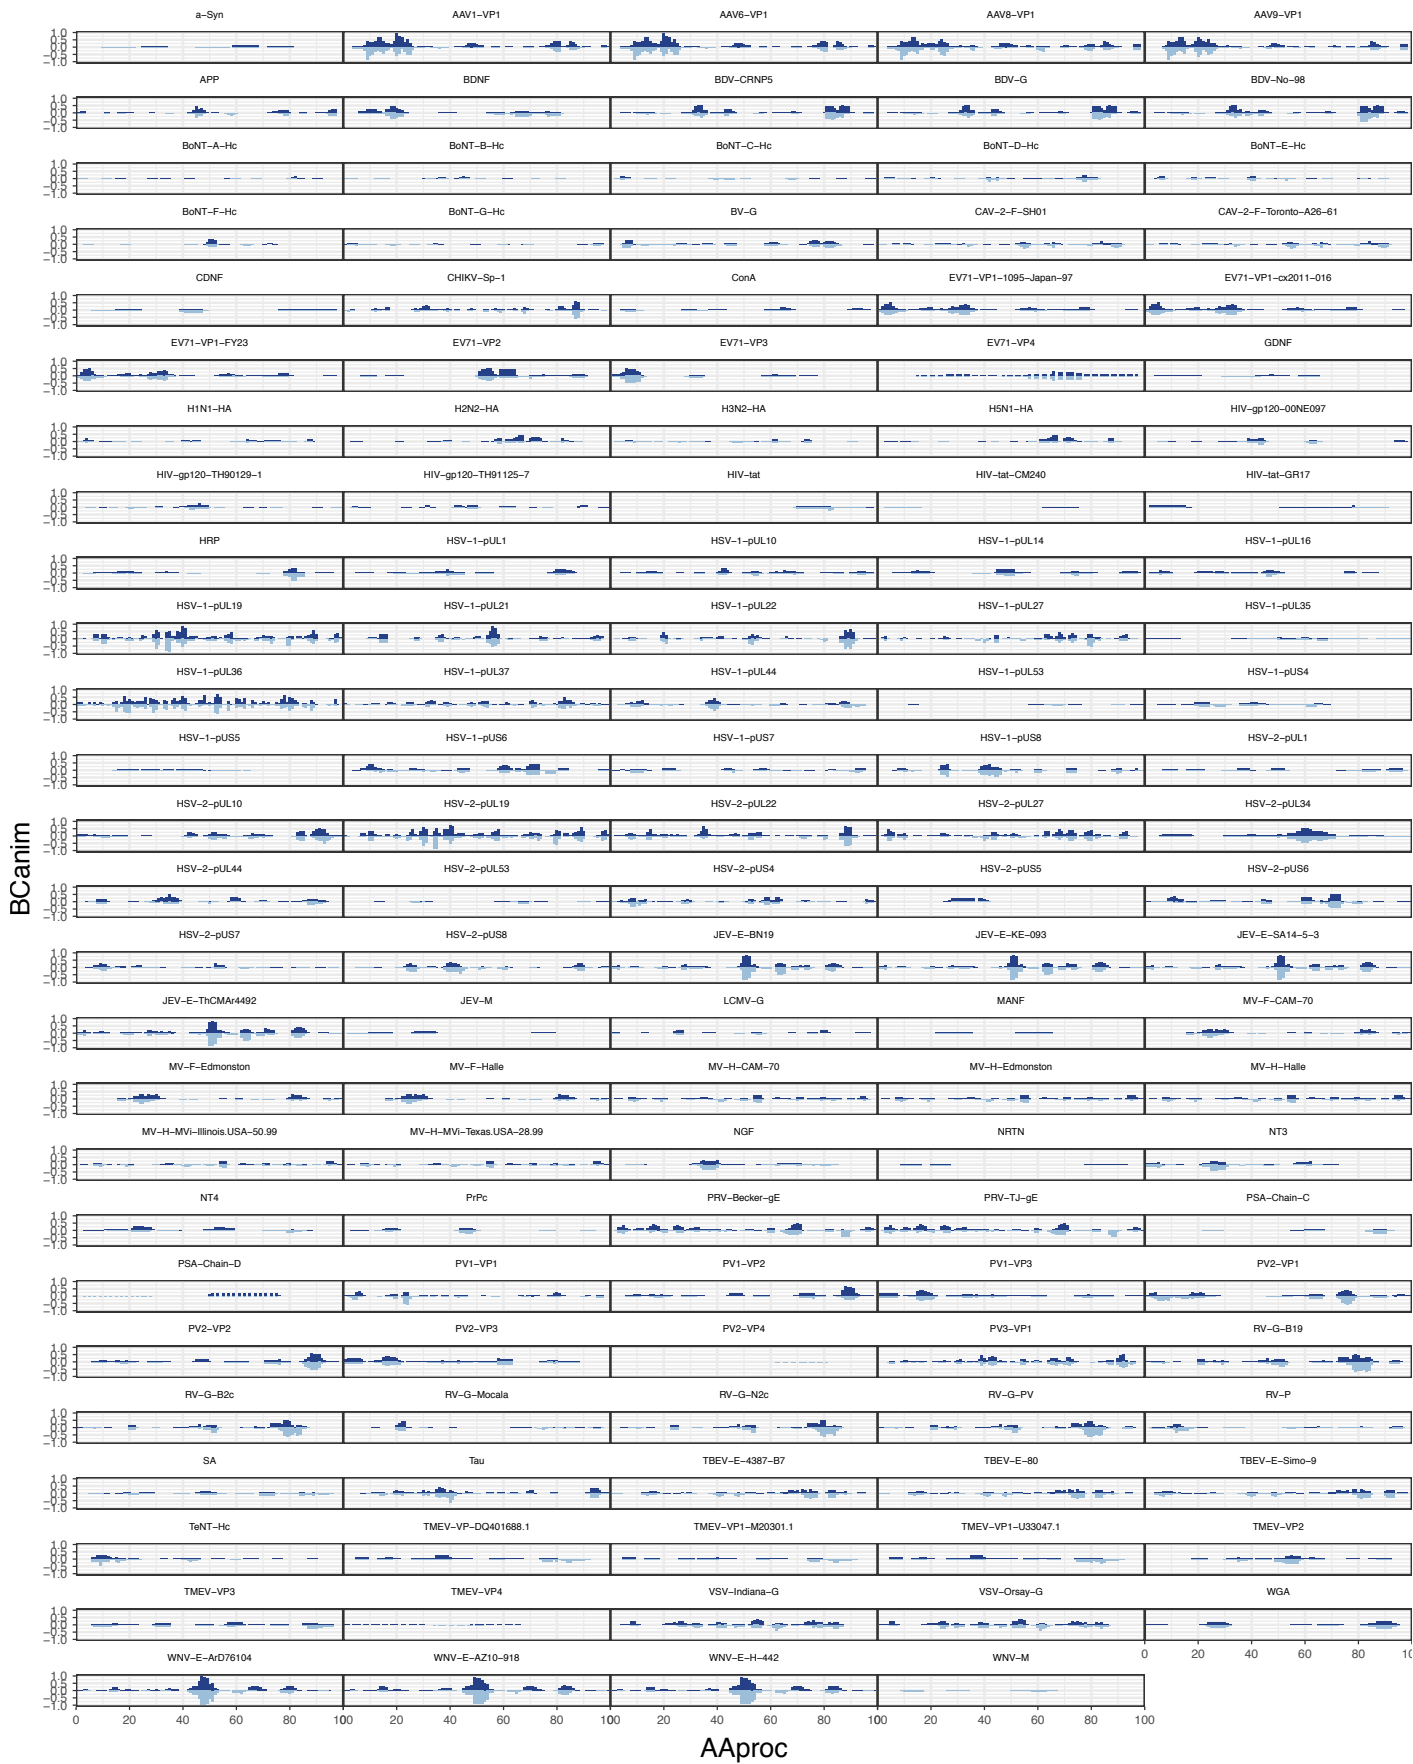

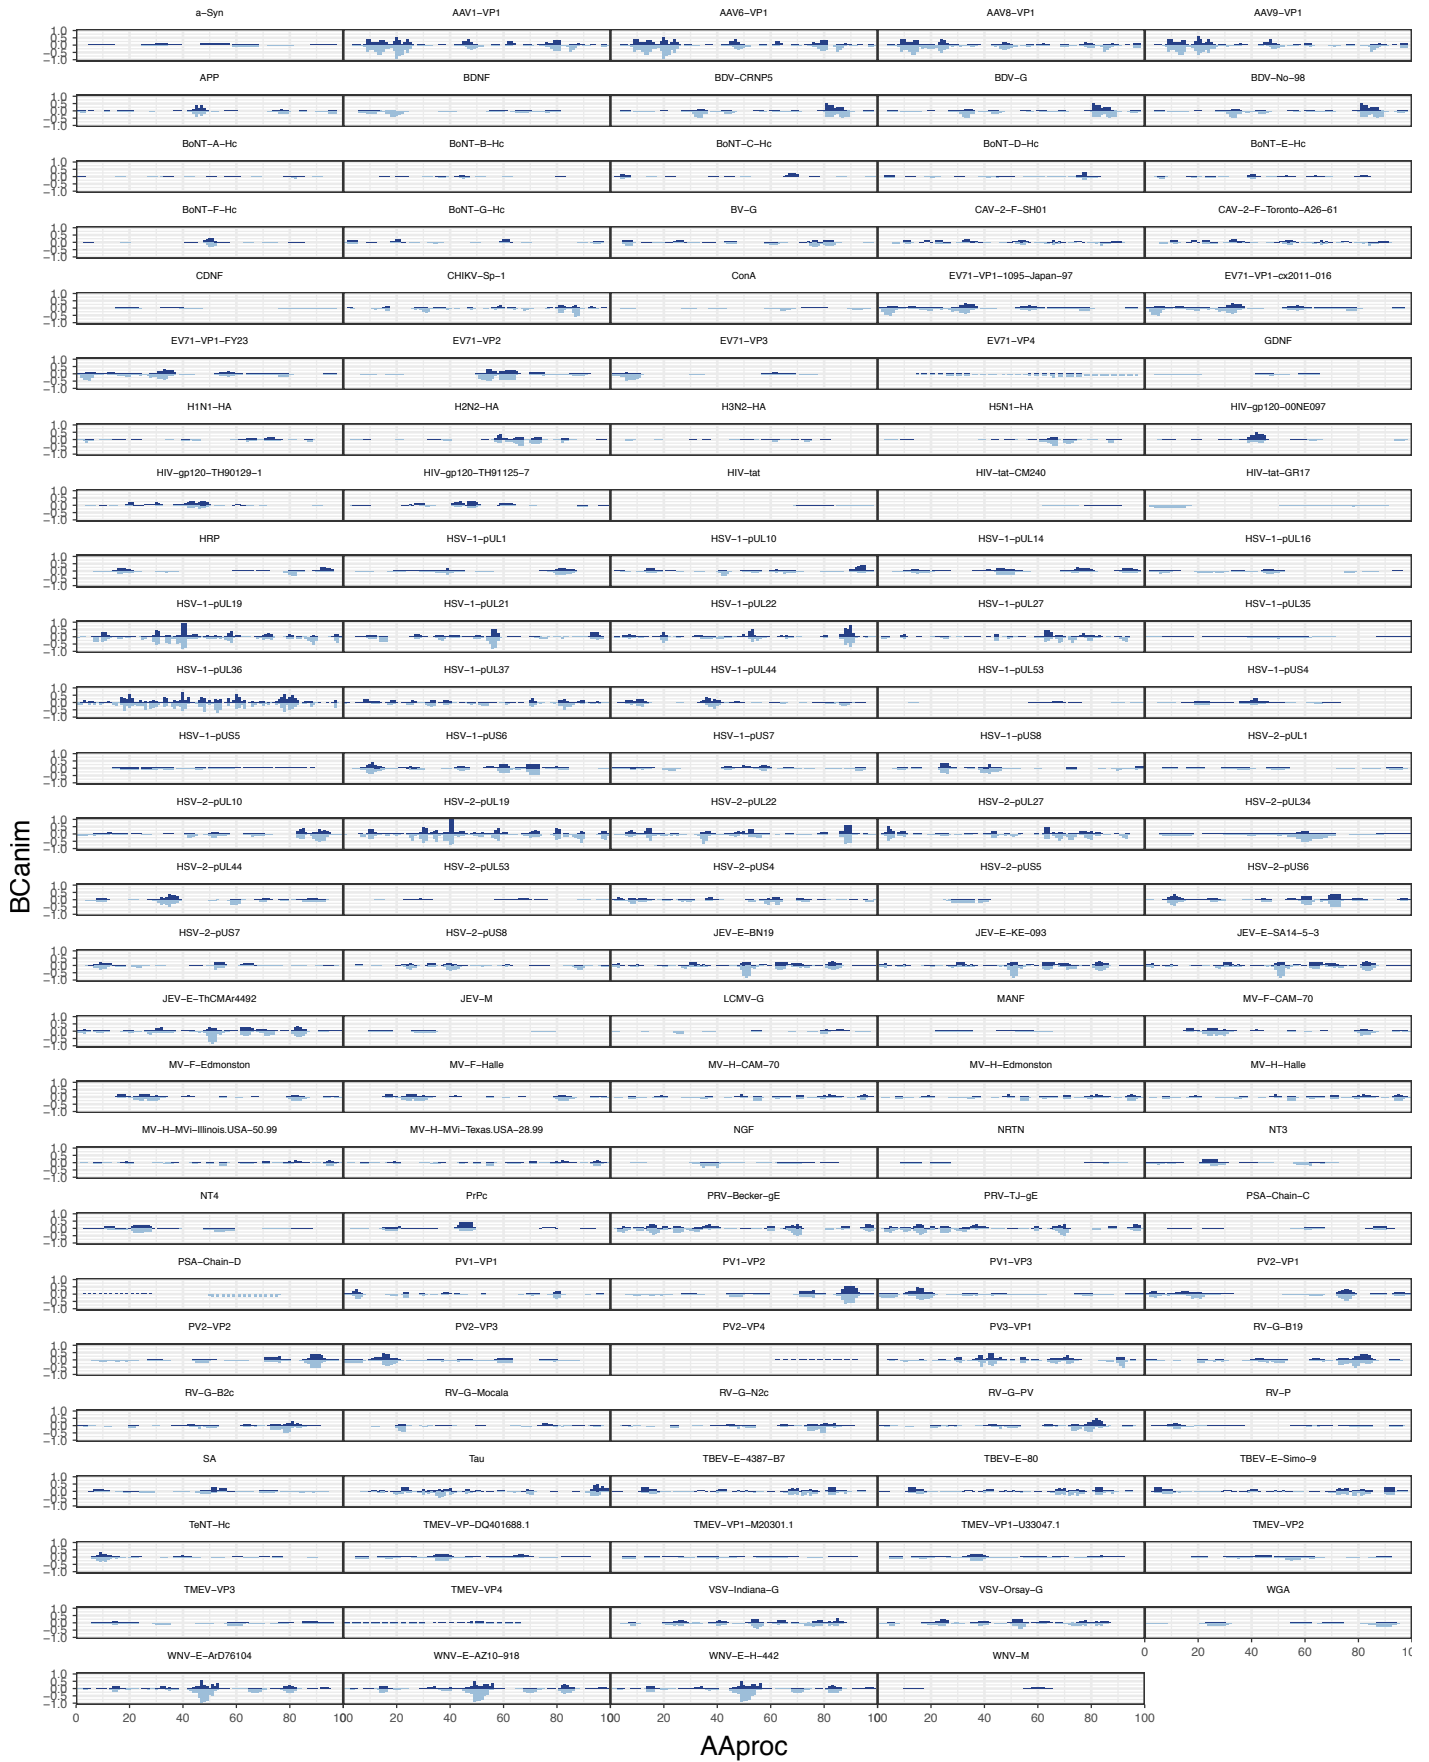

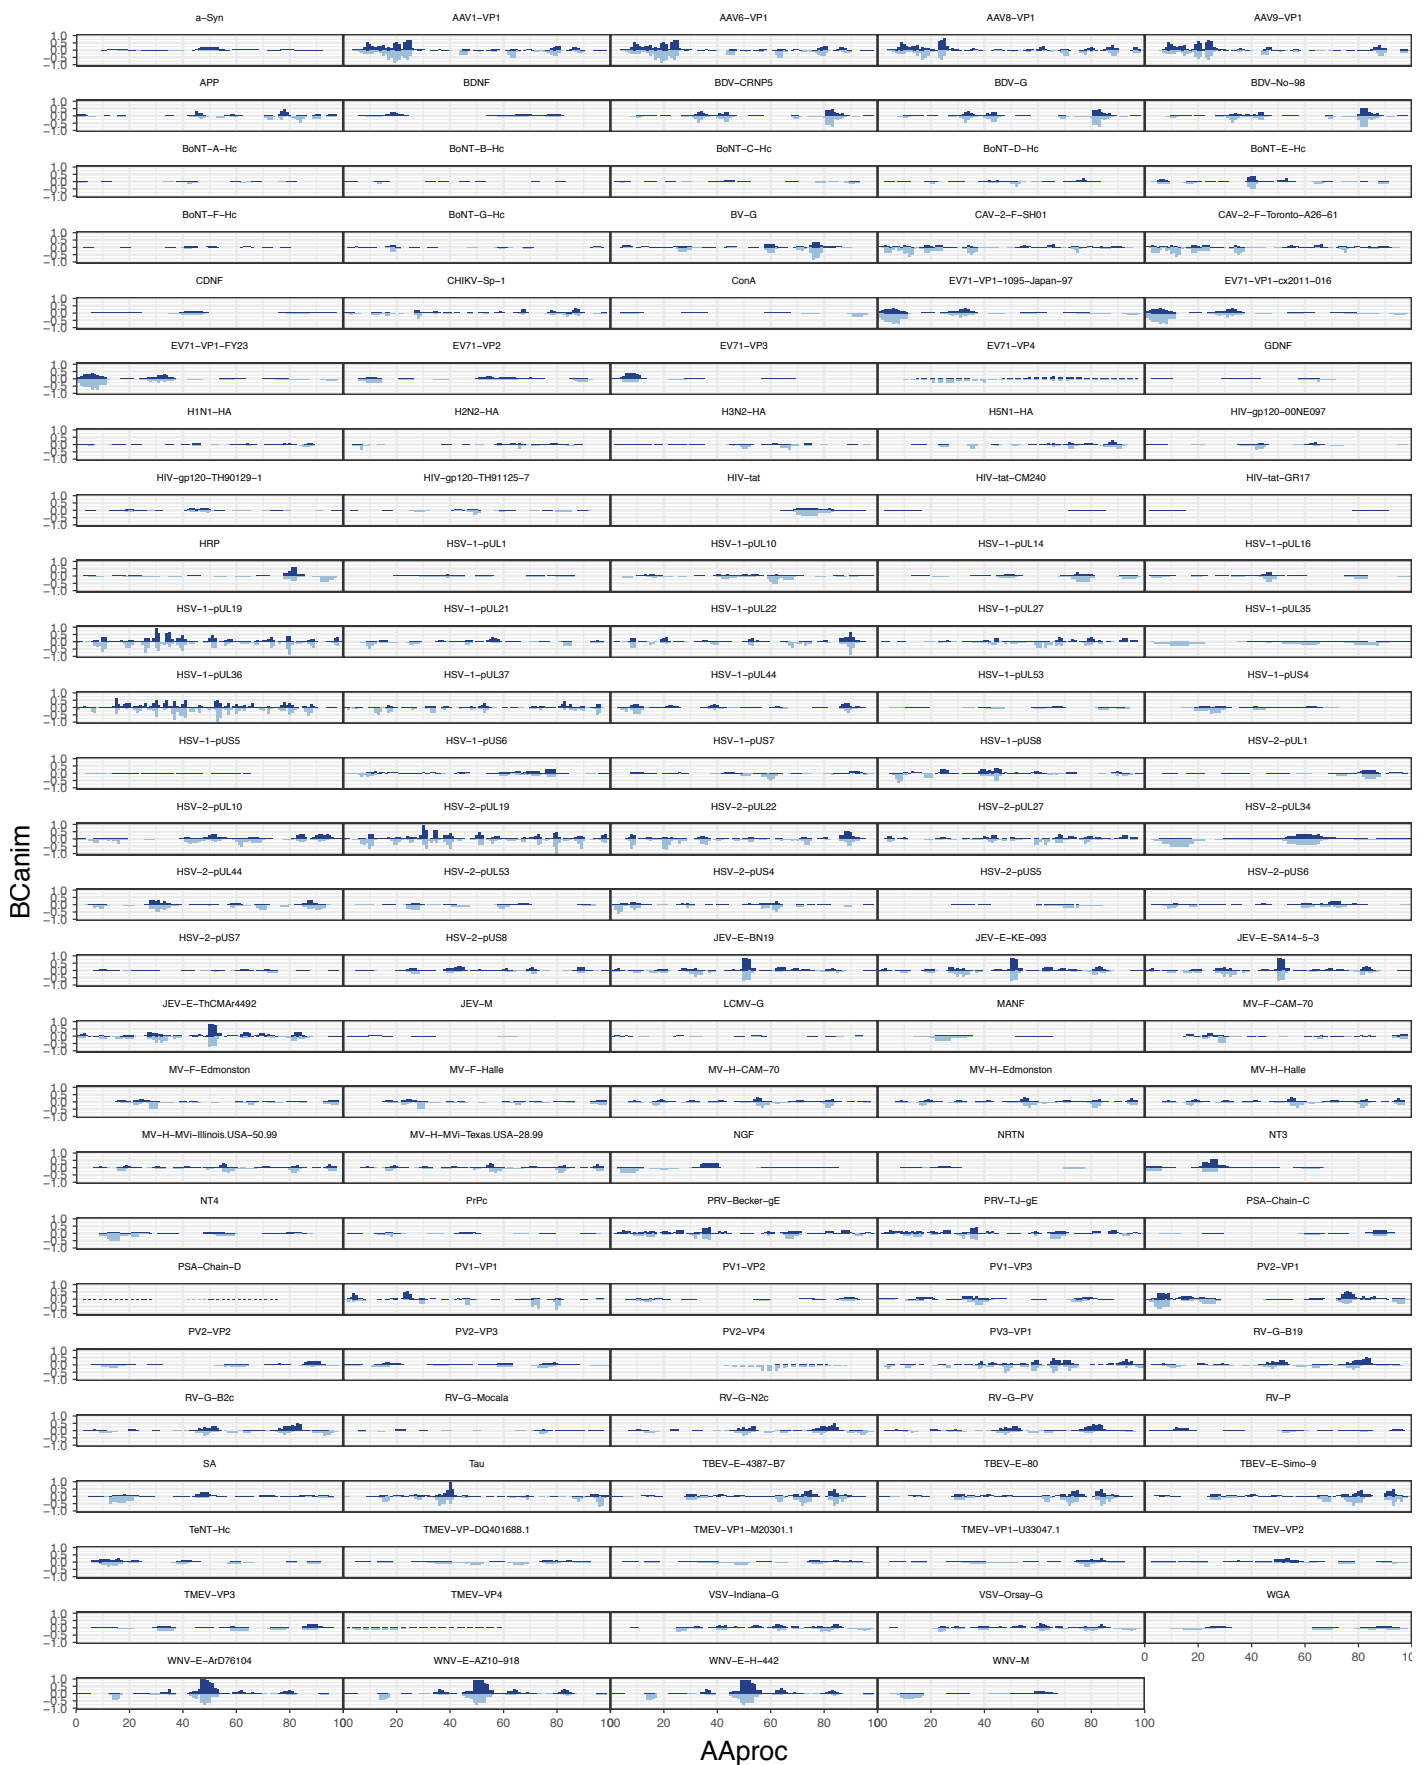



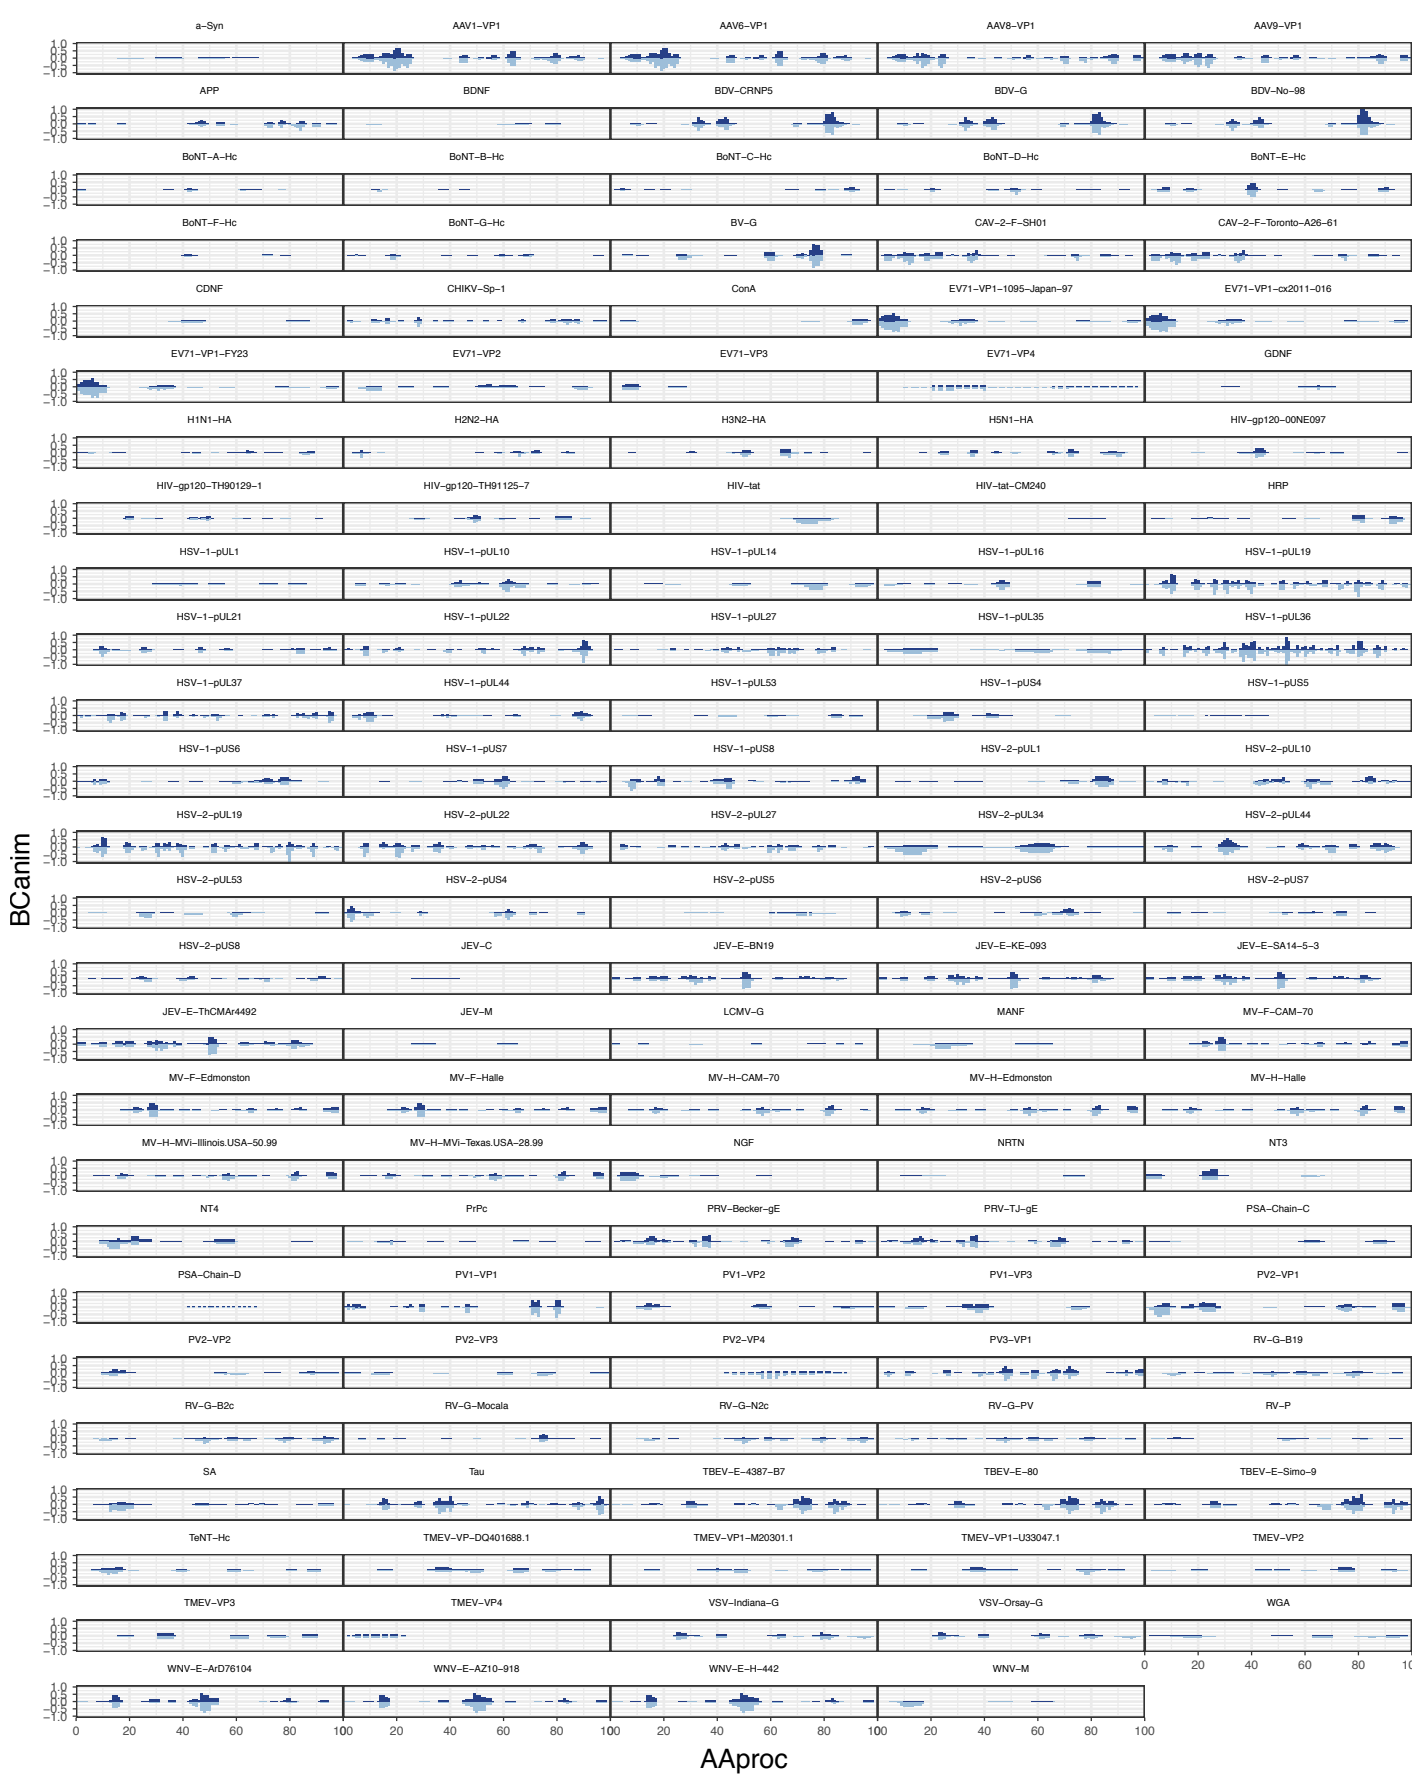

Library ■ mRNA\_3cpc\_Str ■ mRNA\_3cpc\_Th

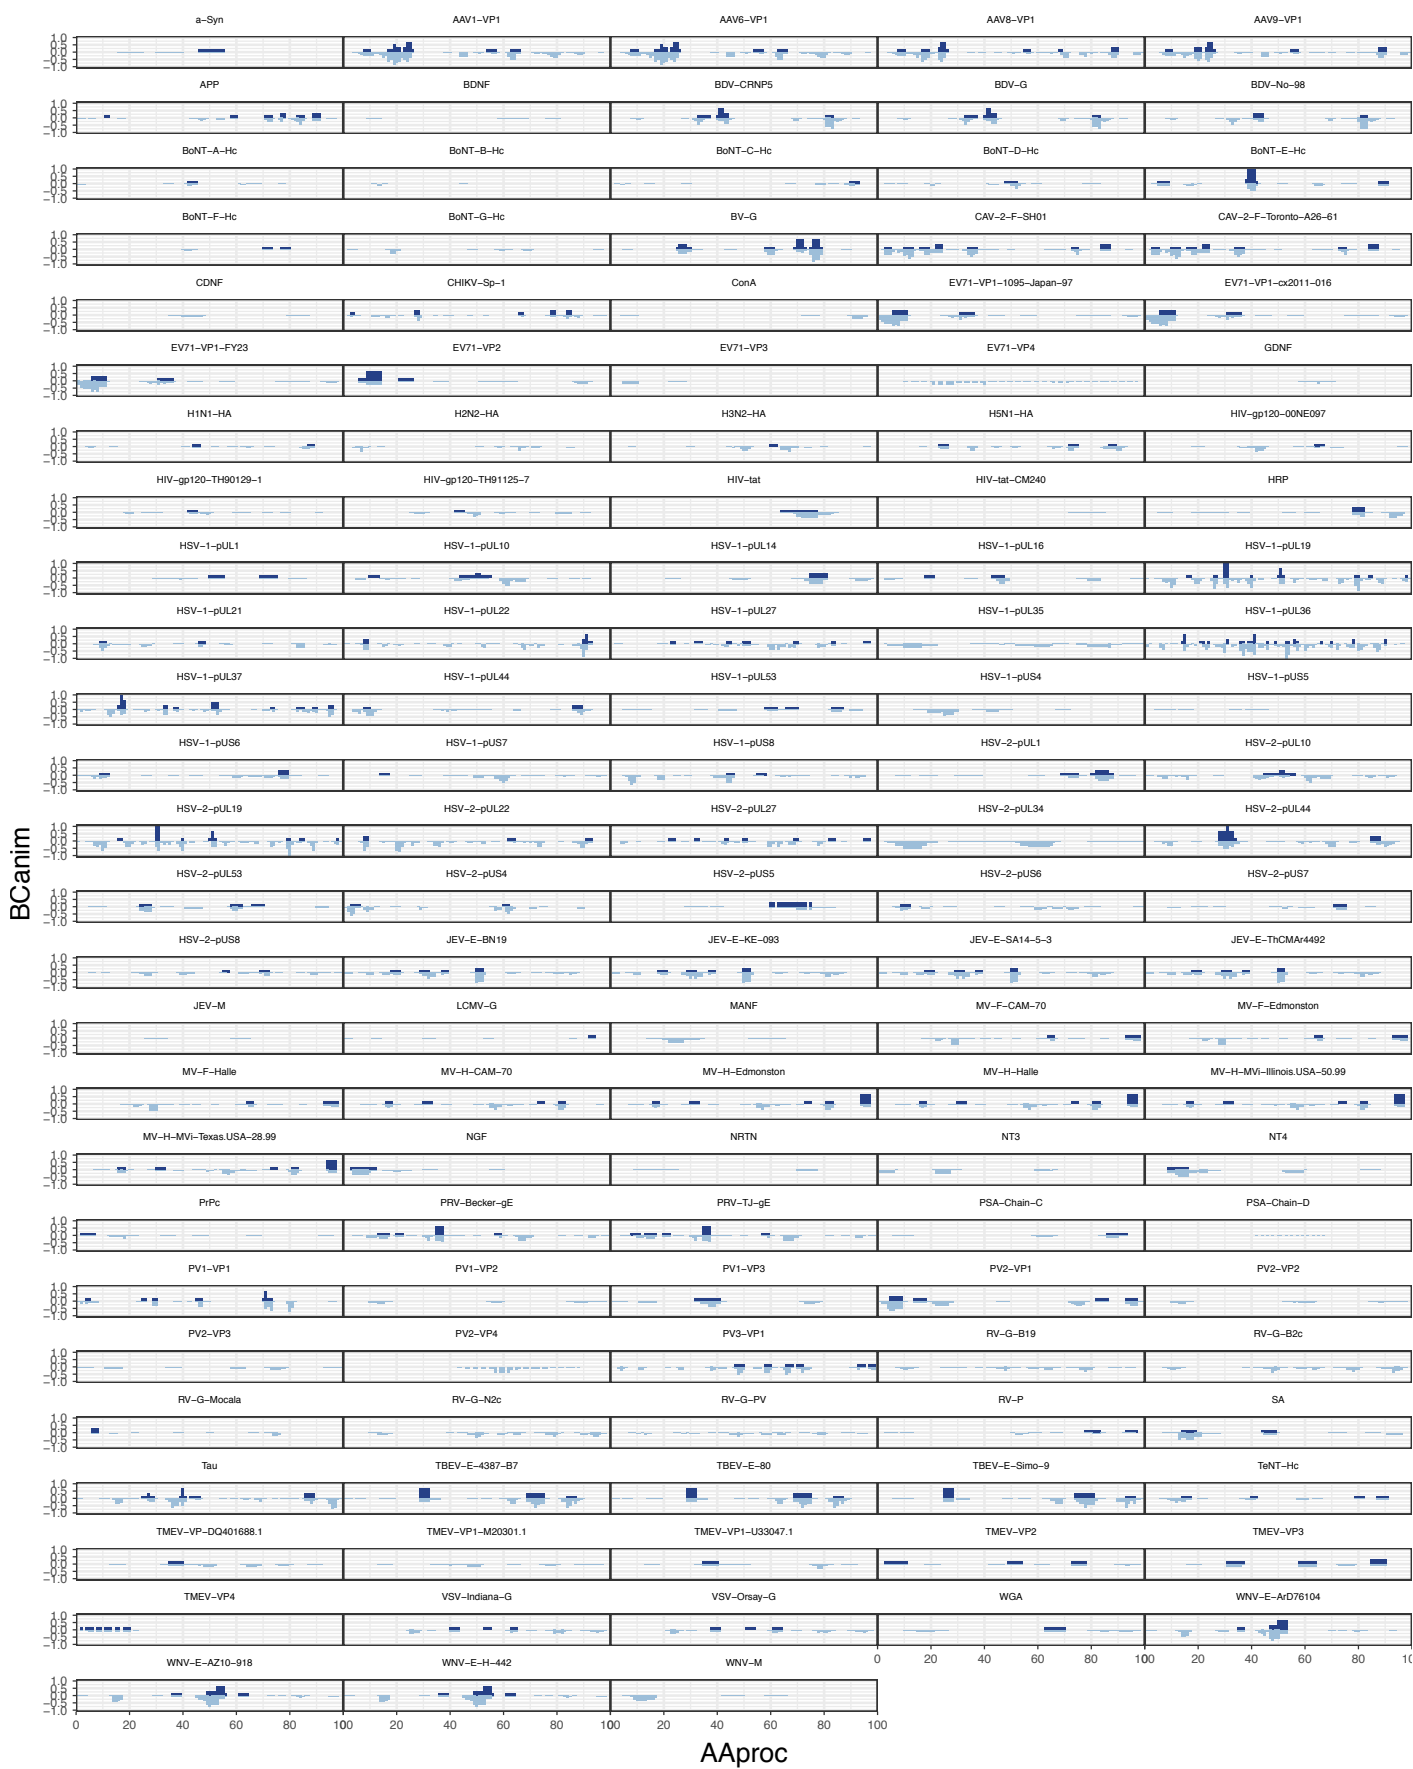

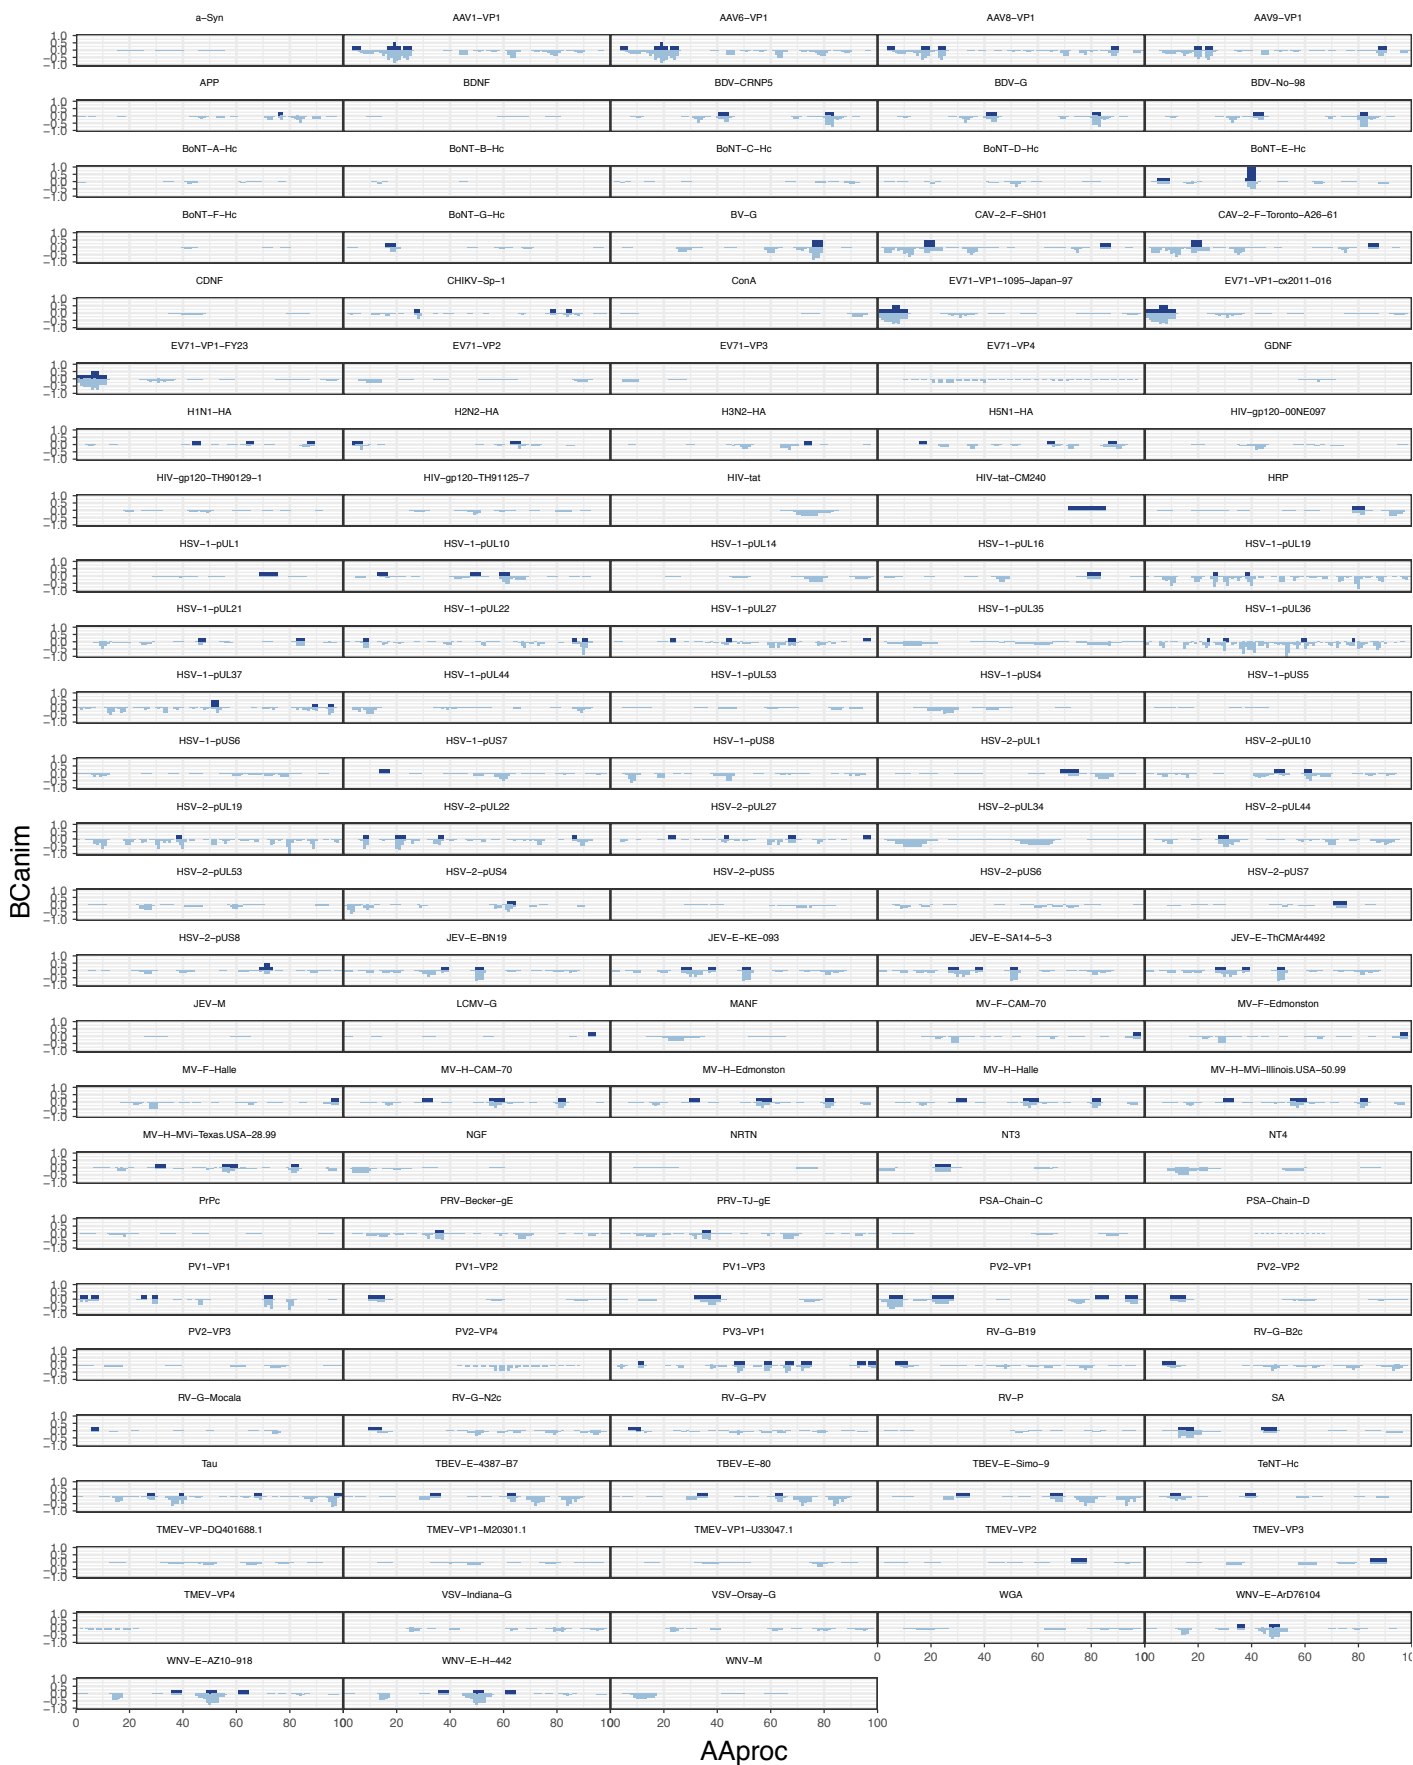

BCanim

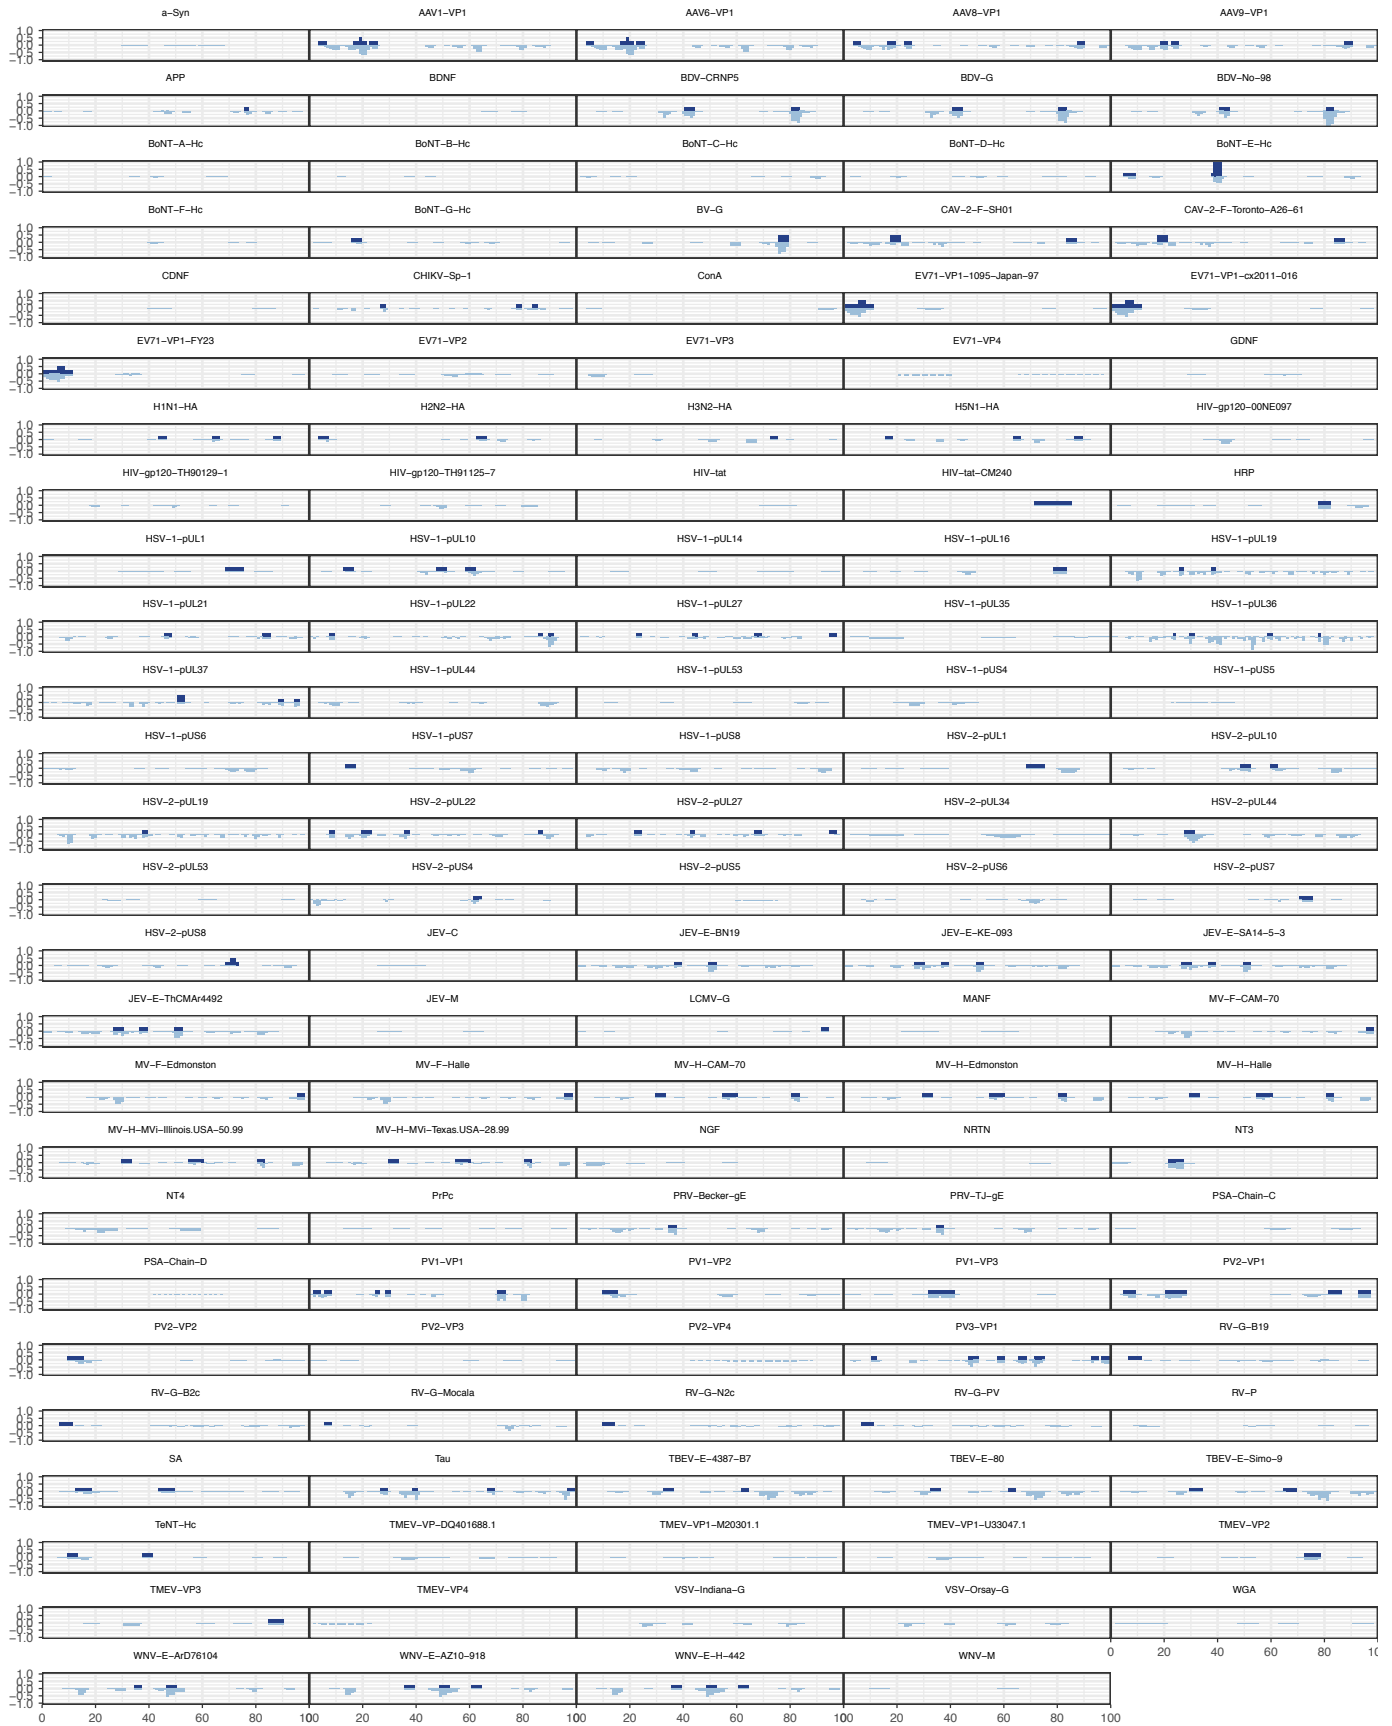

AProc

Library ■ mRNA\_3cpc\_SN ■ mRNA\_3cpc\_Th

BCanim

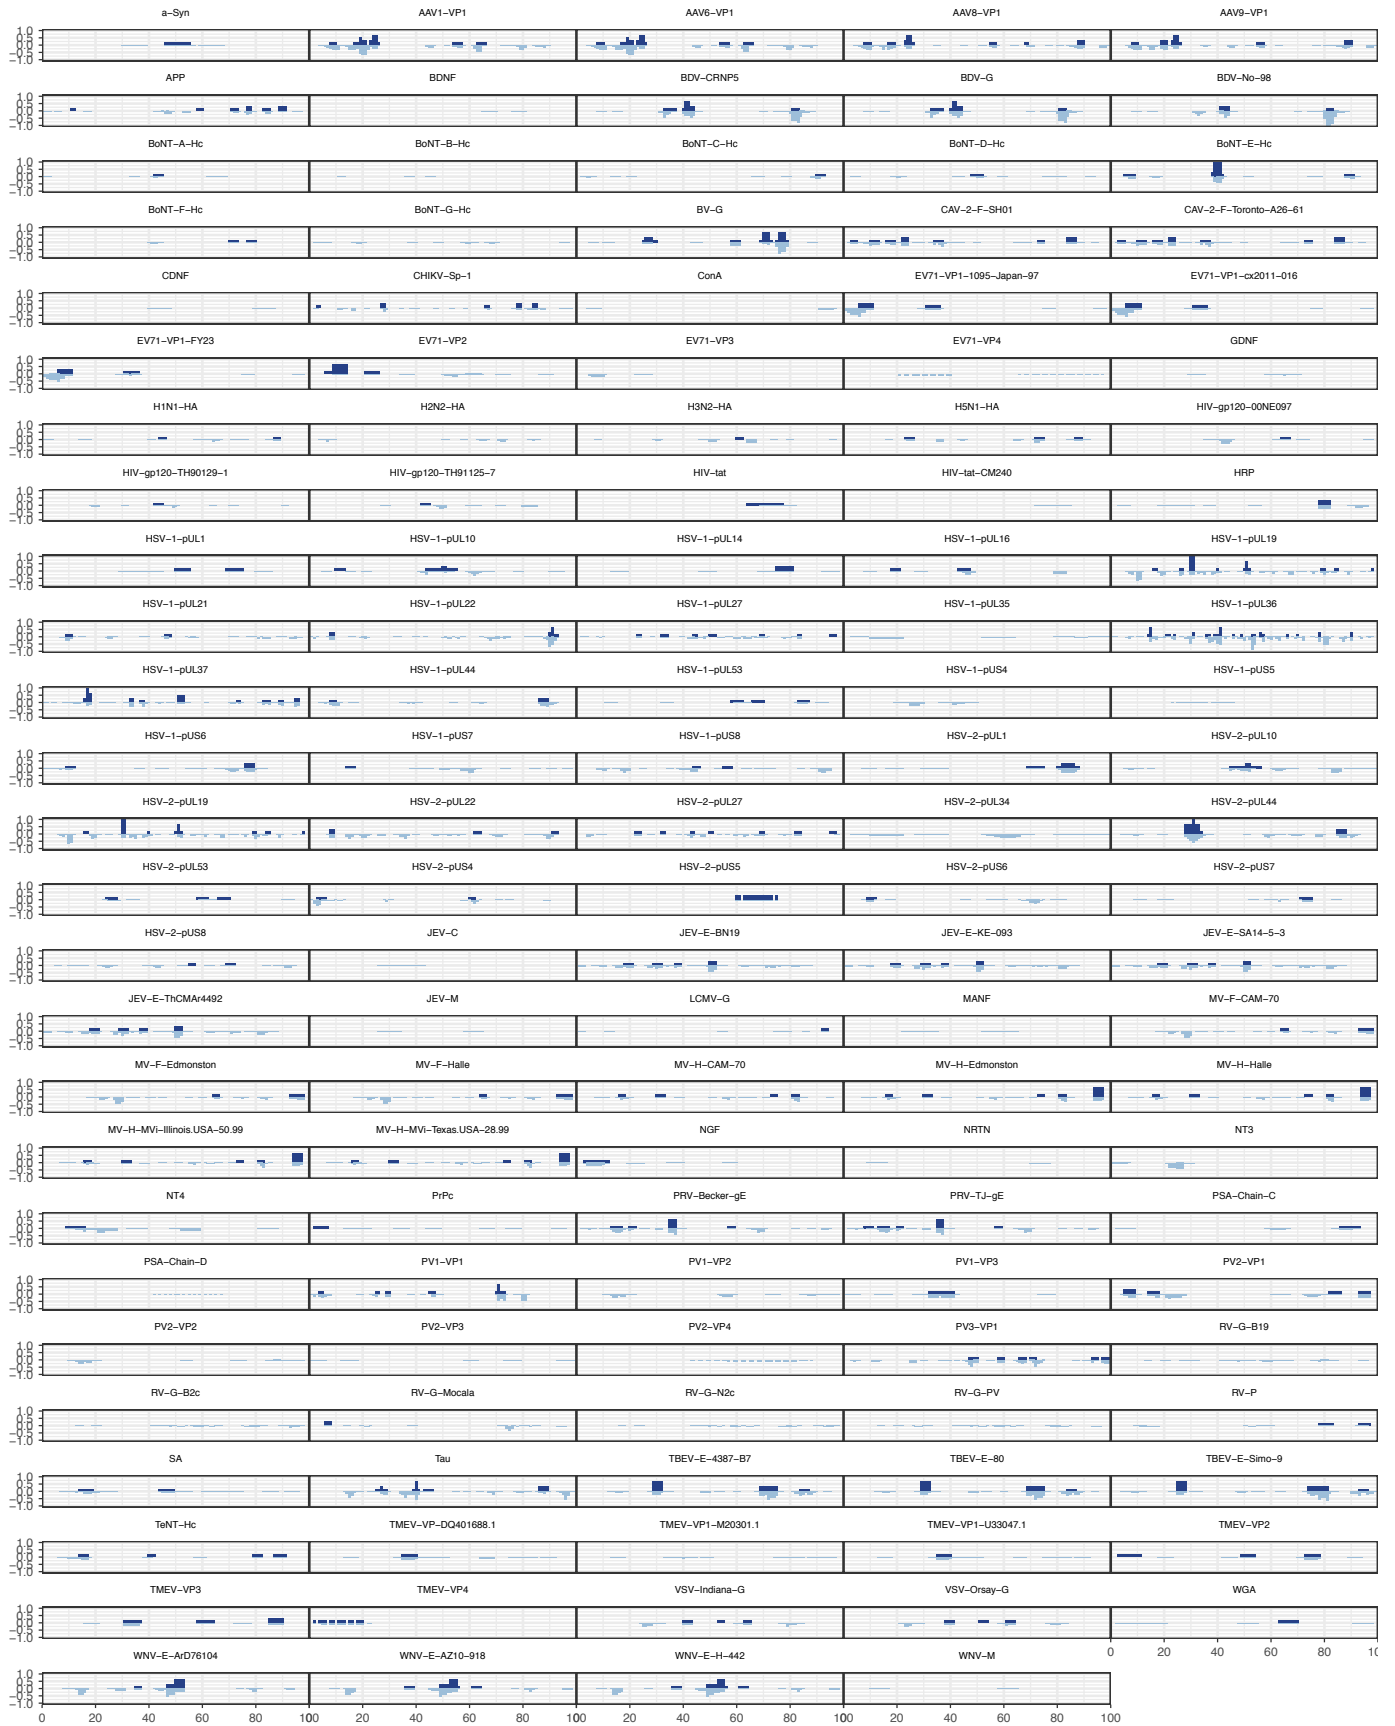

Aapro

Library ■ mRNA\_3cpc\_Ctx ■ mRNA\_3cpc\_Th

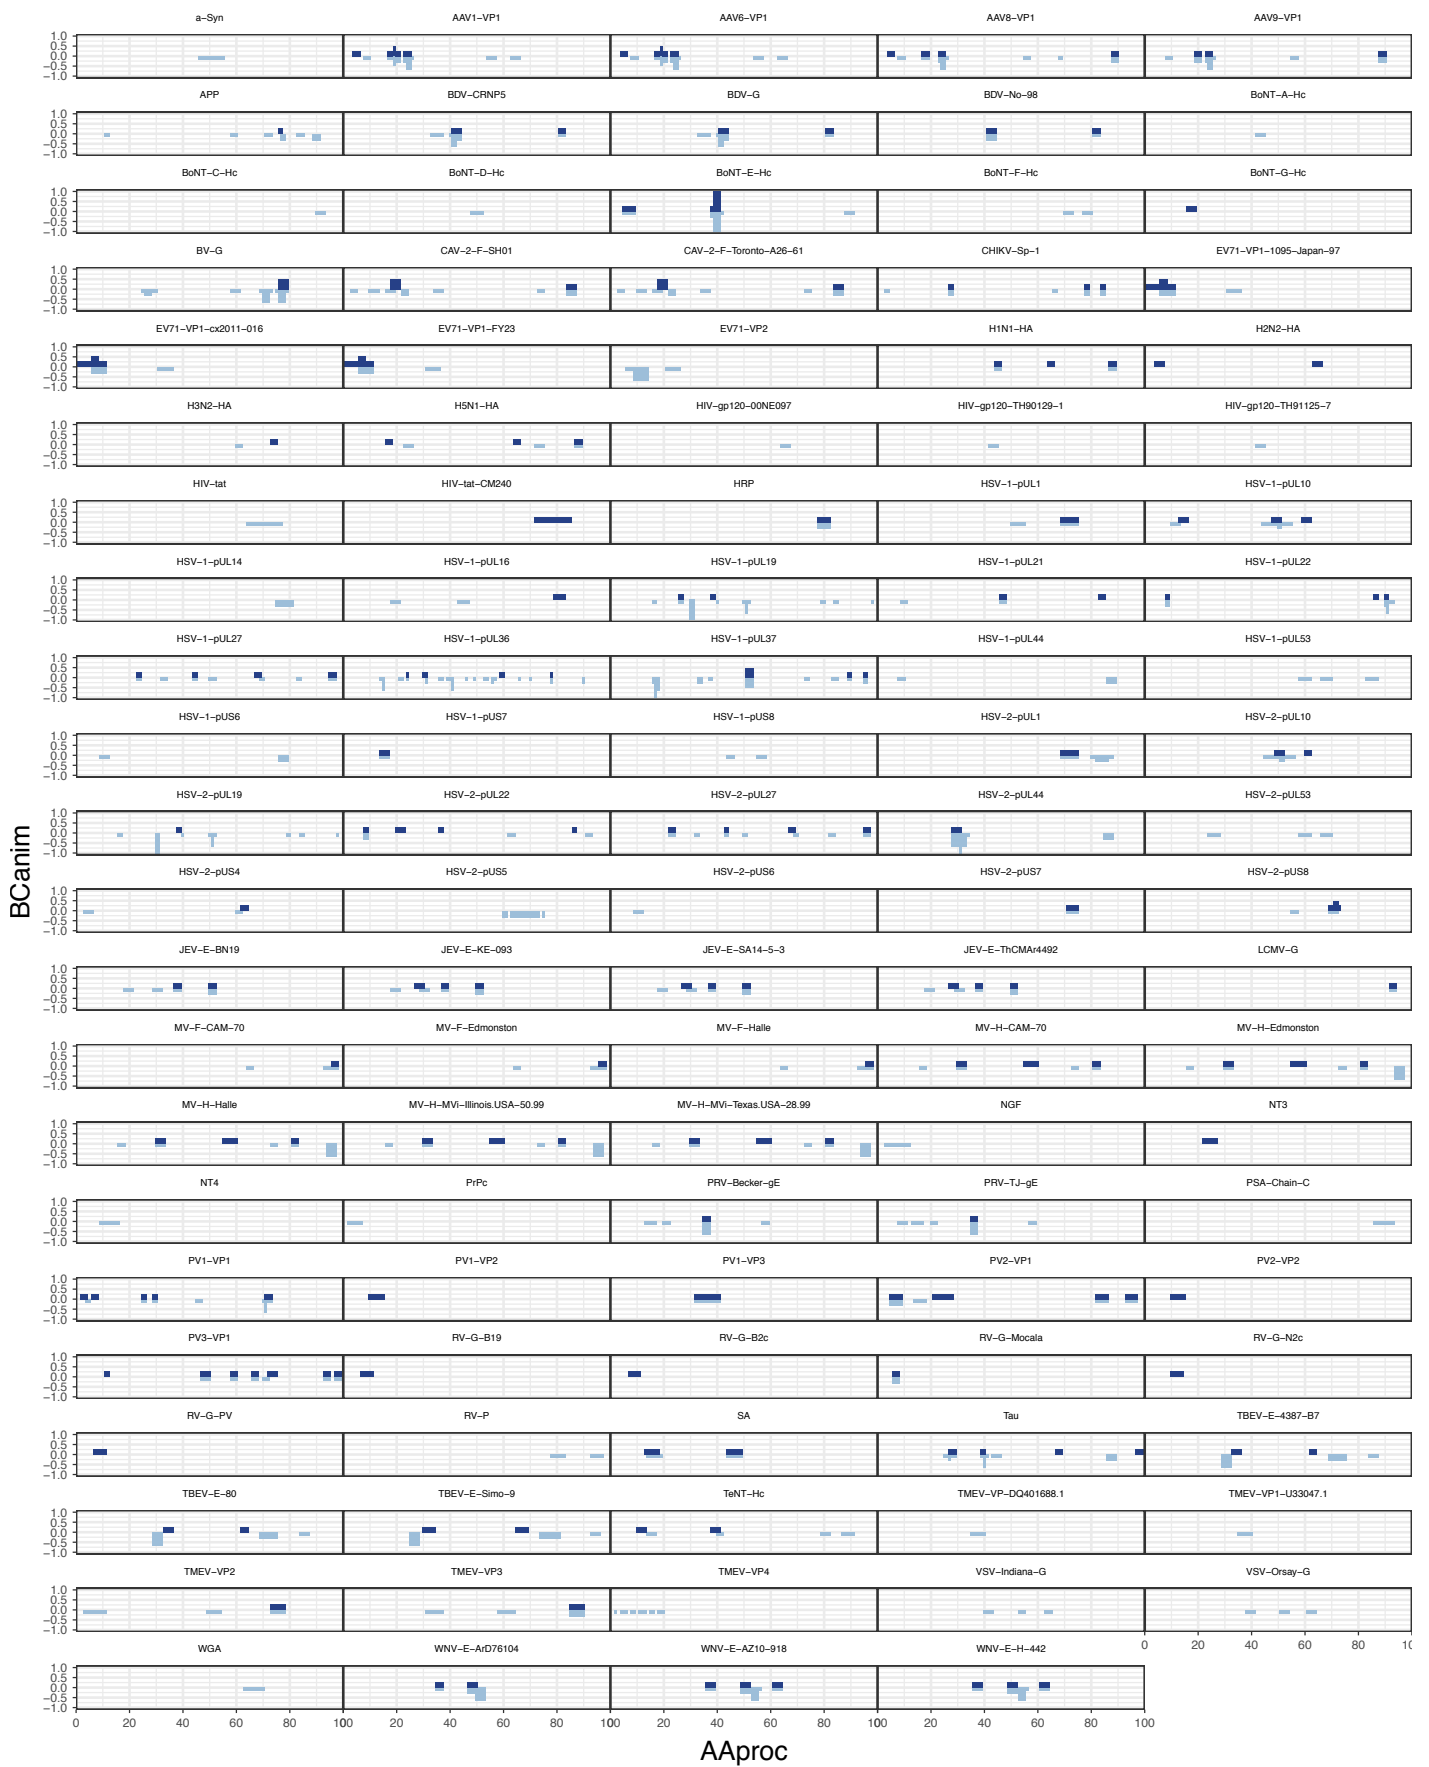

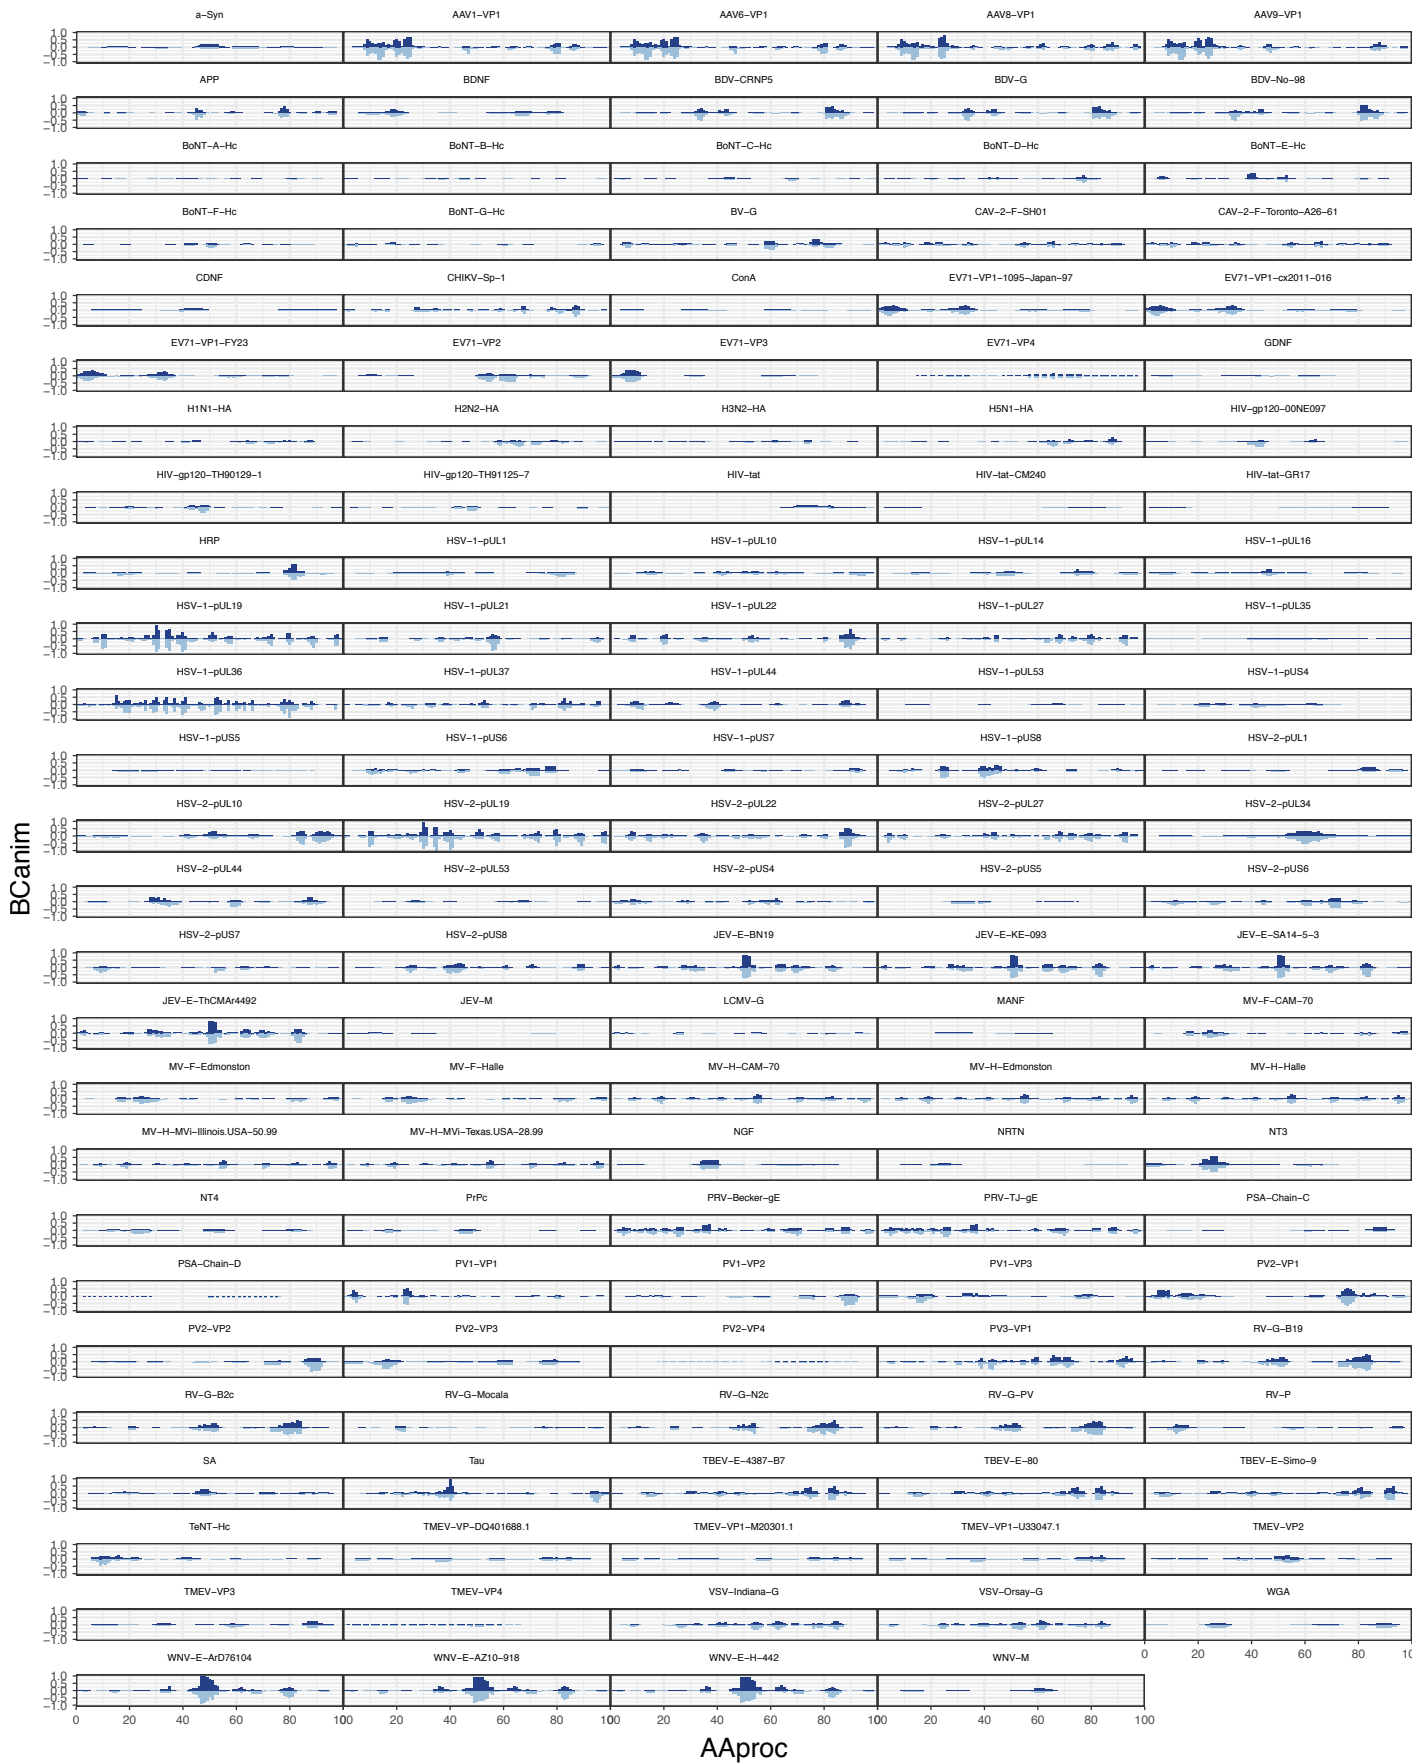

Library mRNA\_30cpc\_Trsp mRNA\_3cpc\_Trsp

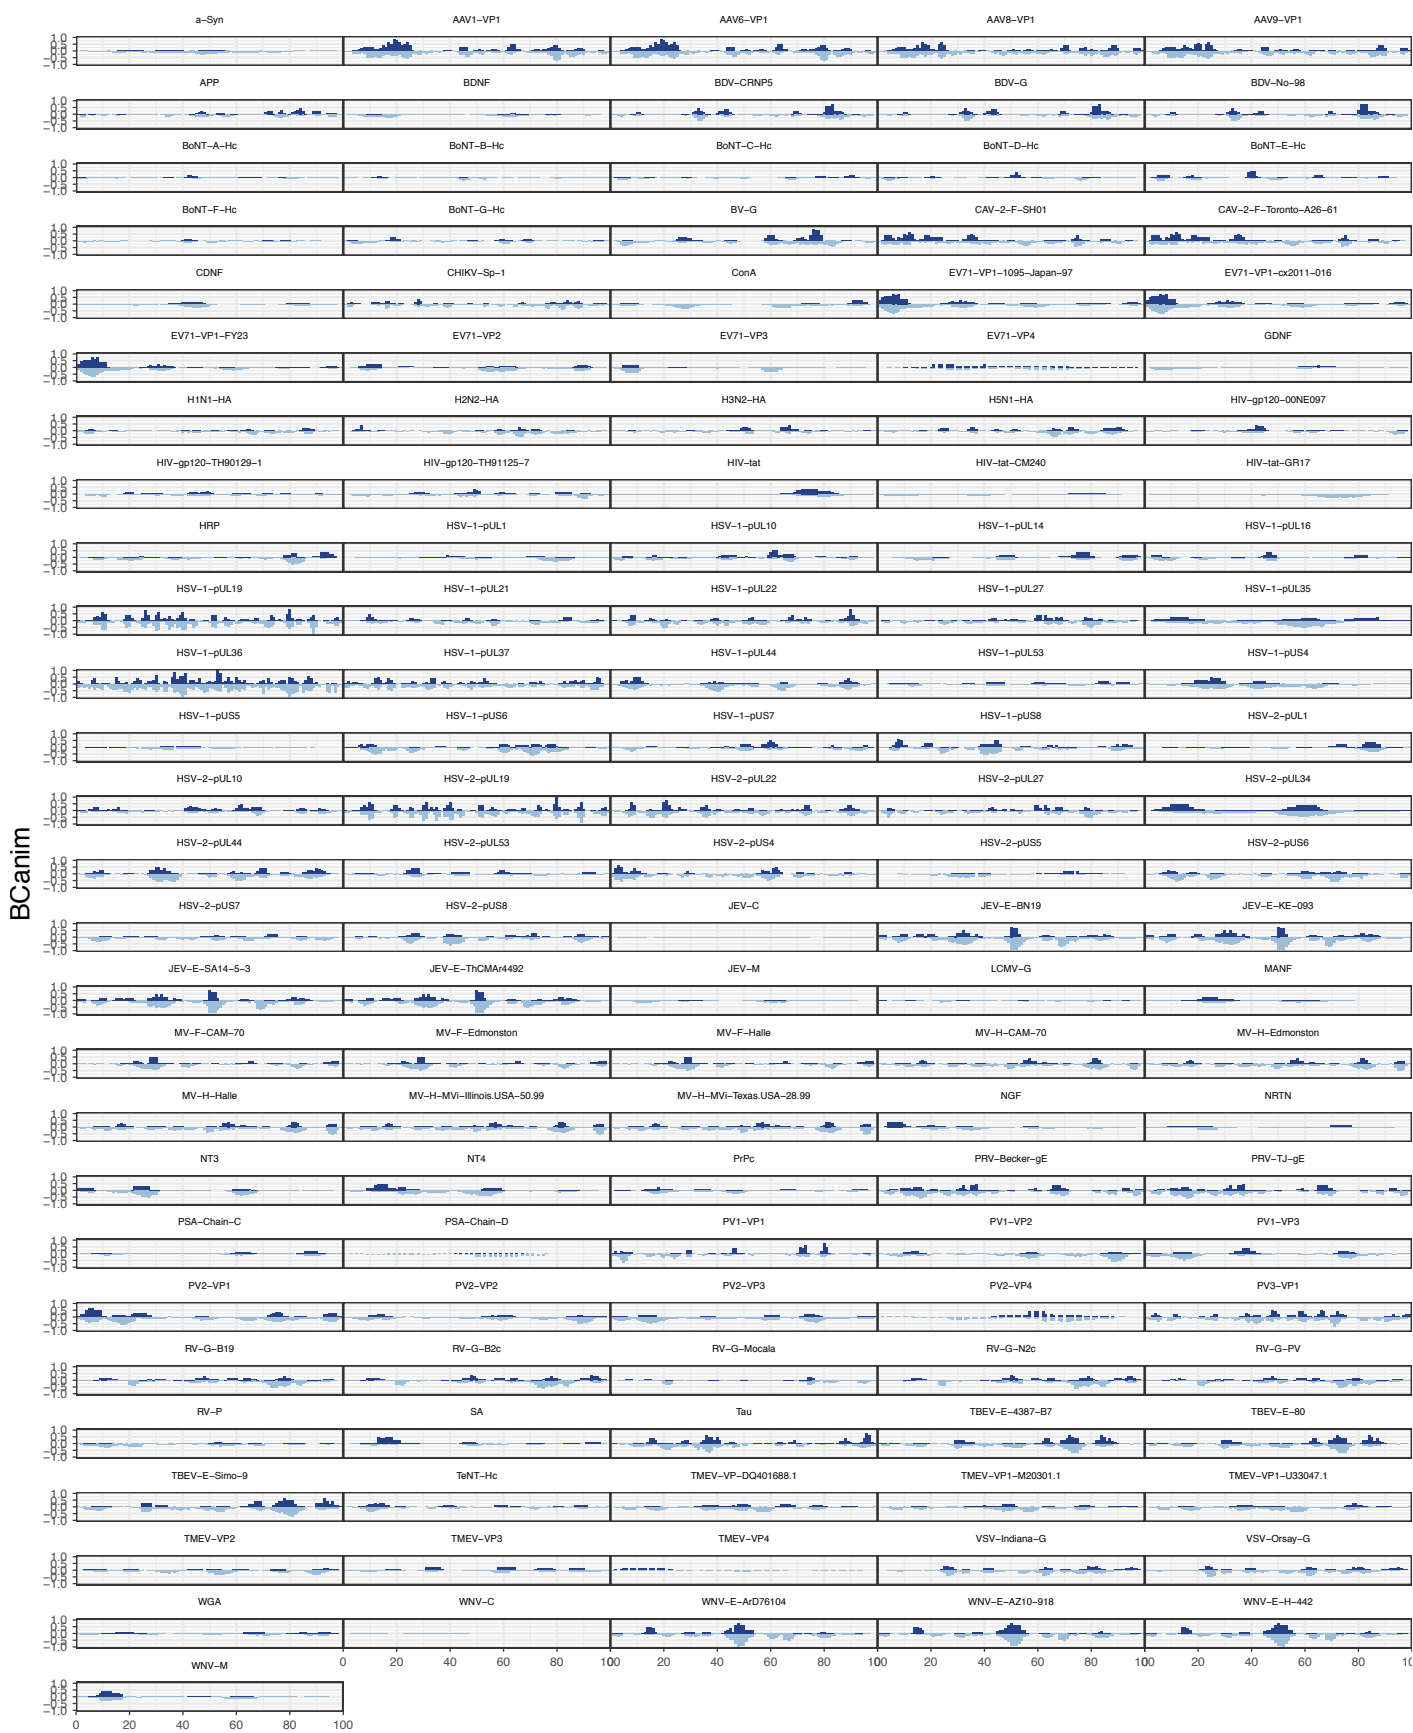

Aaproc

Library mRNA\_30cpc\_Str mRNA\_3cpc\_Str



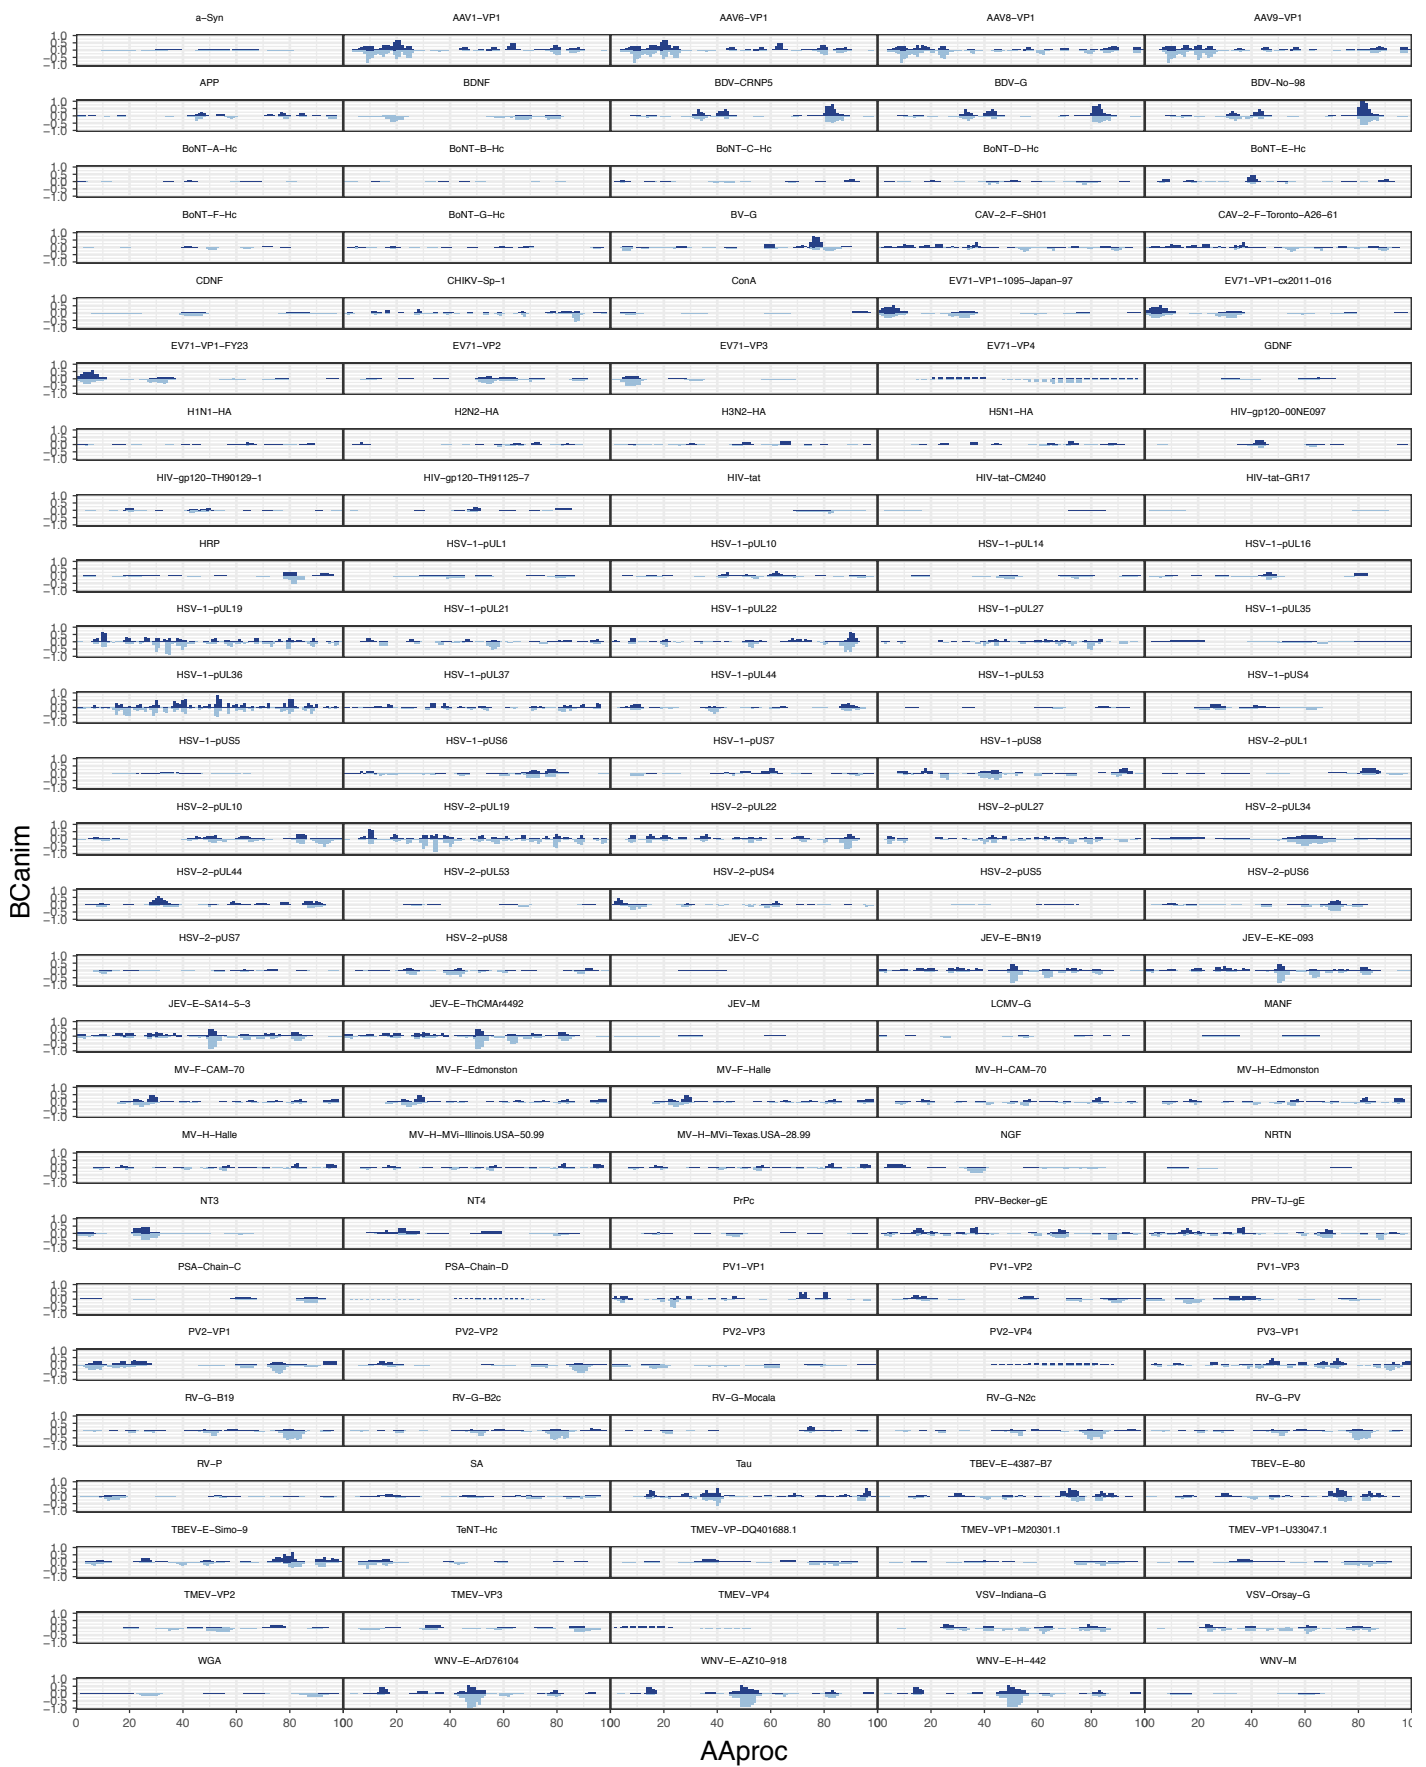

BCanim

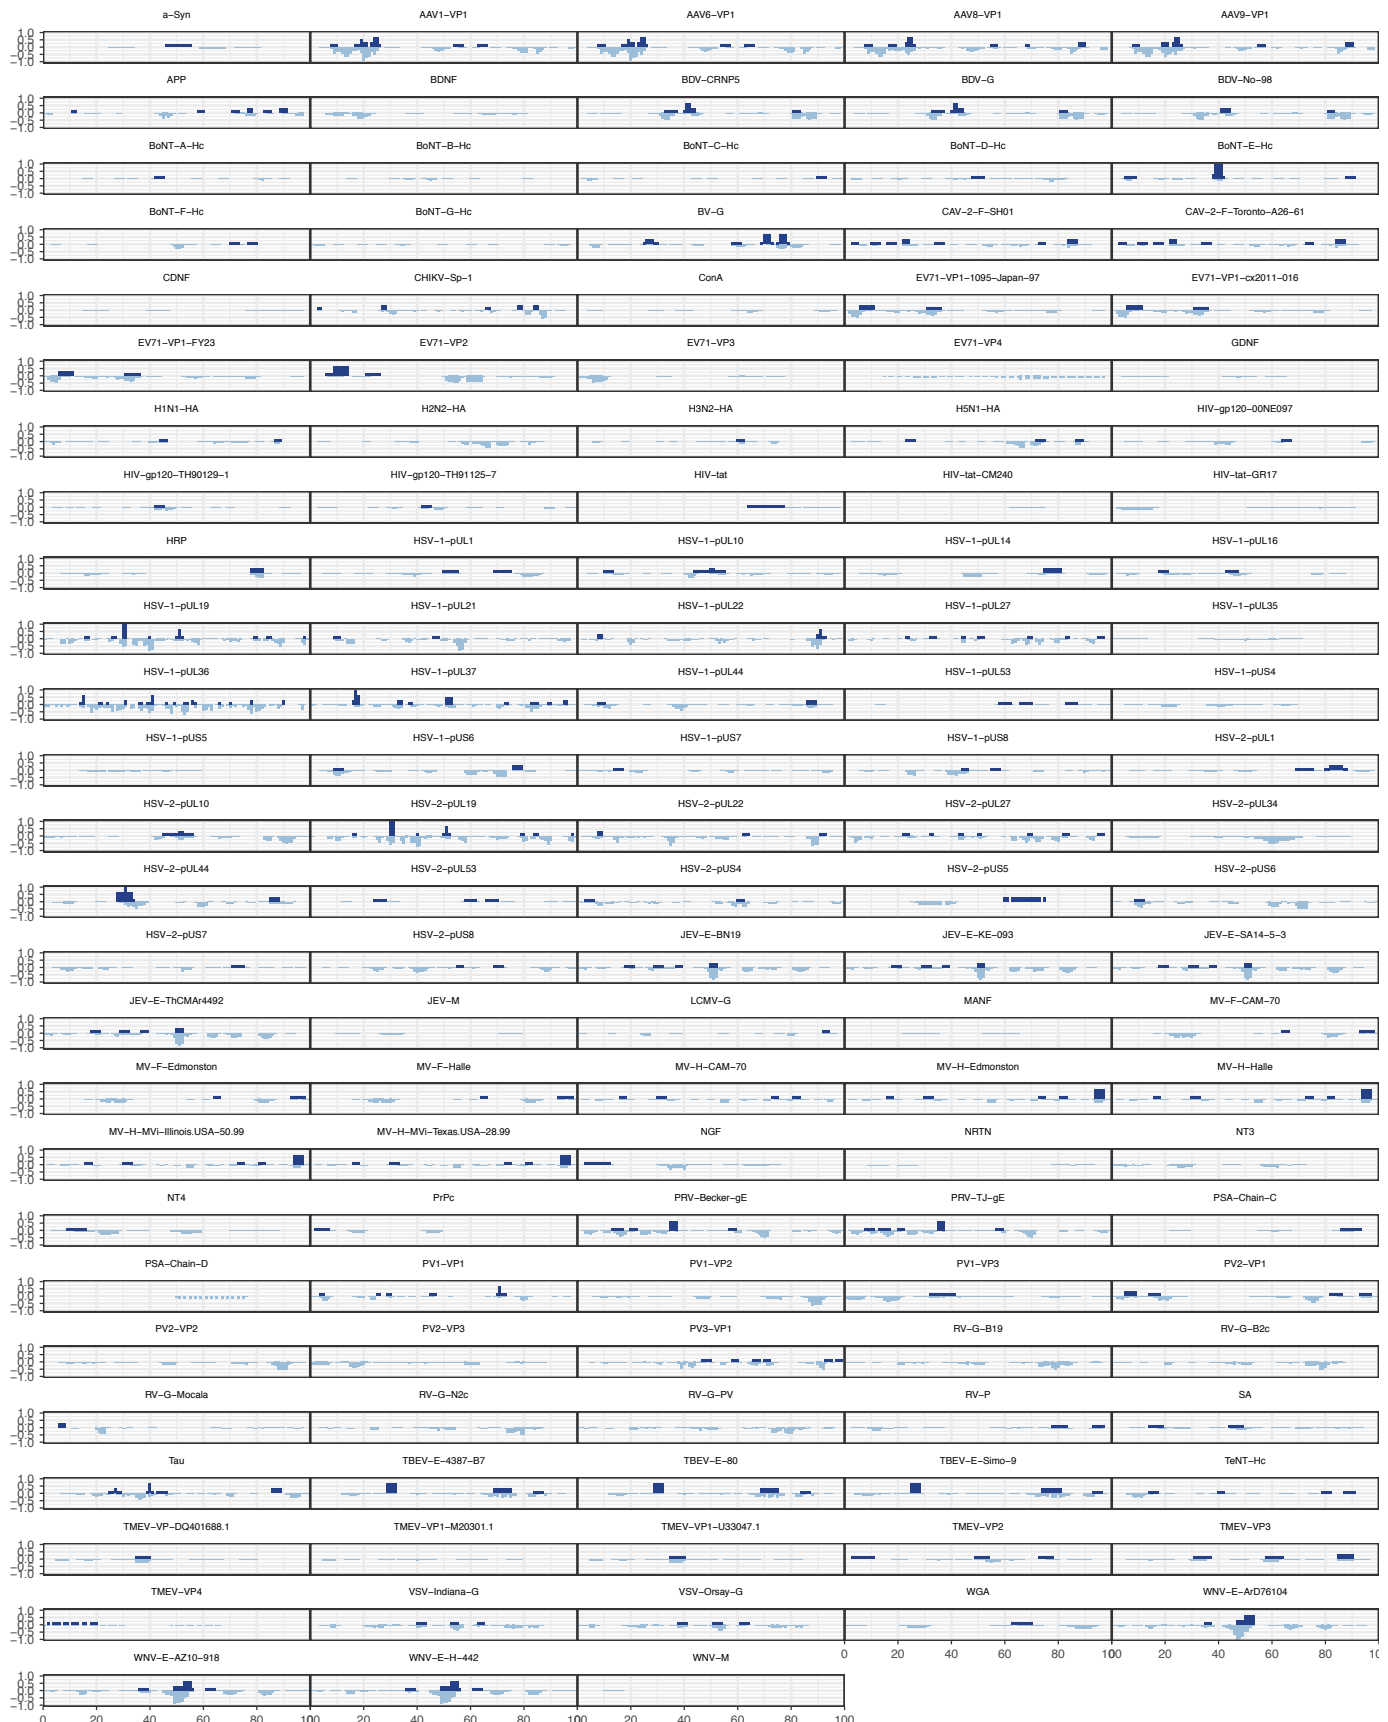

AAprc

Library mRNA\_30cpc\_Ctx mRNA\_3cpc\_Ctx

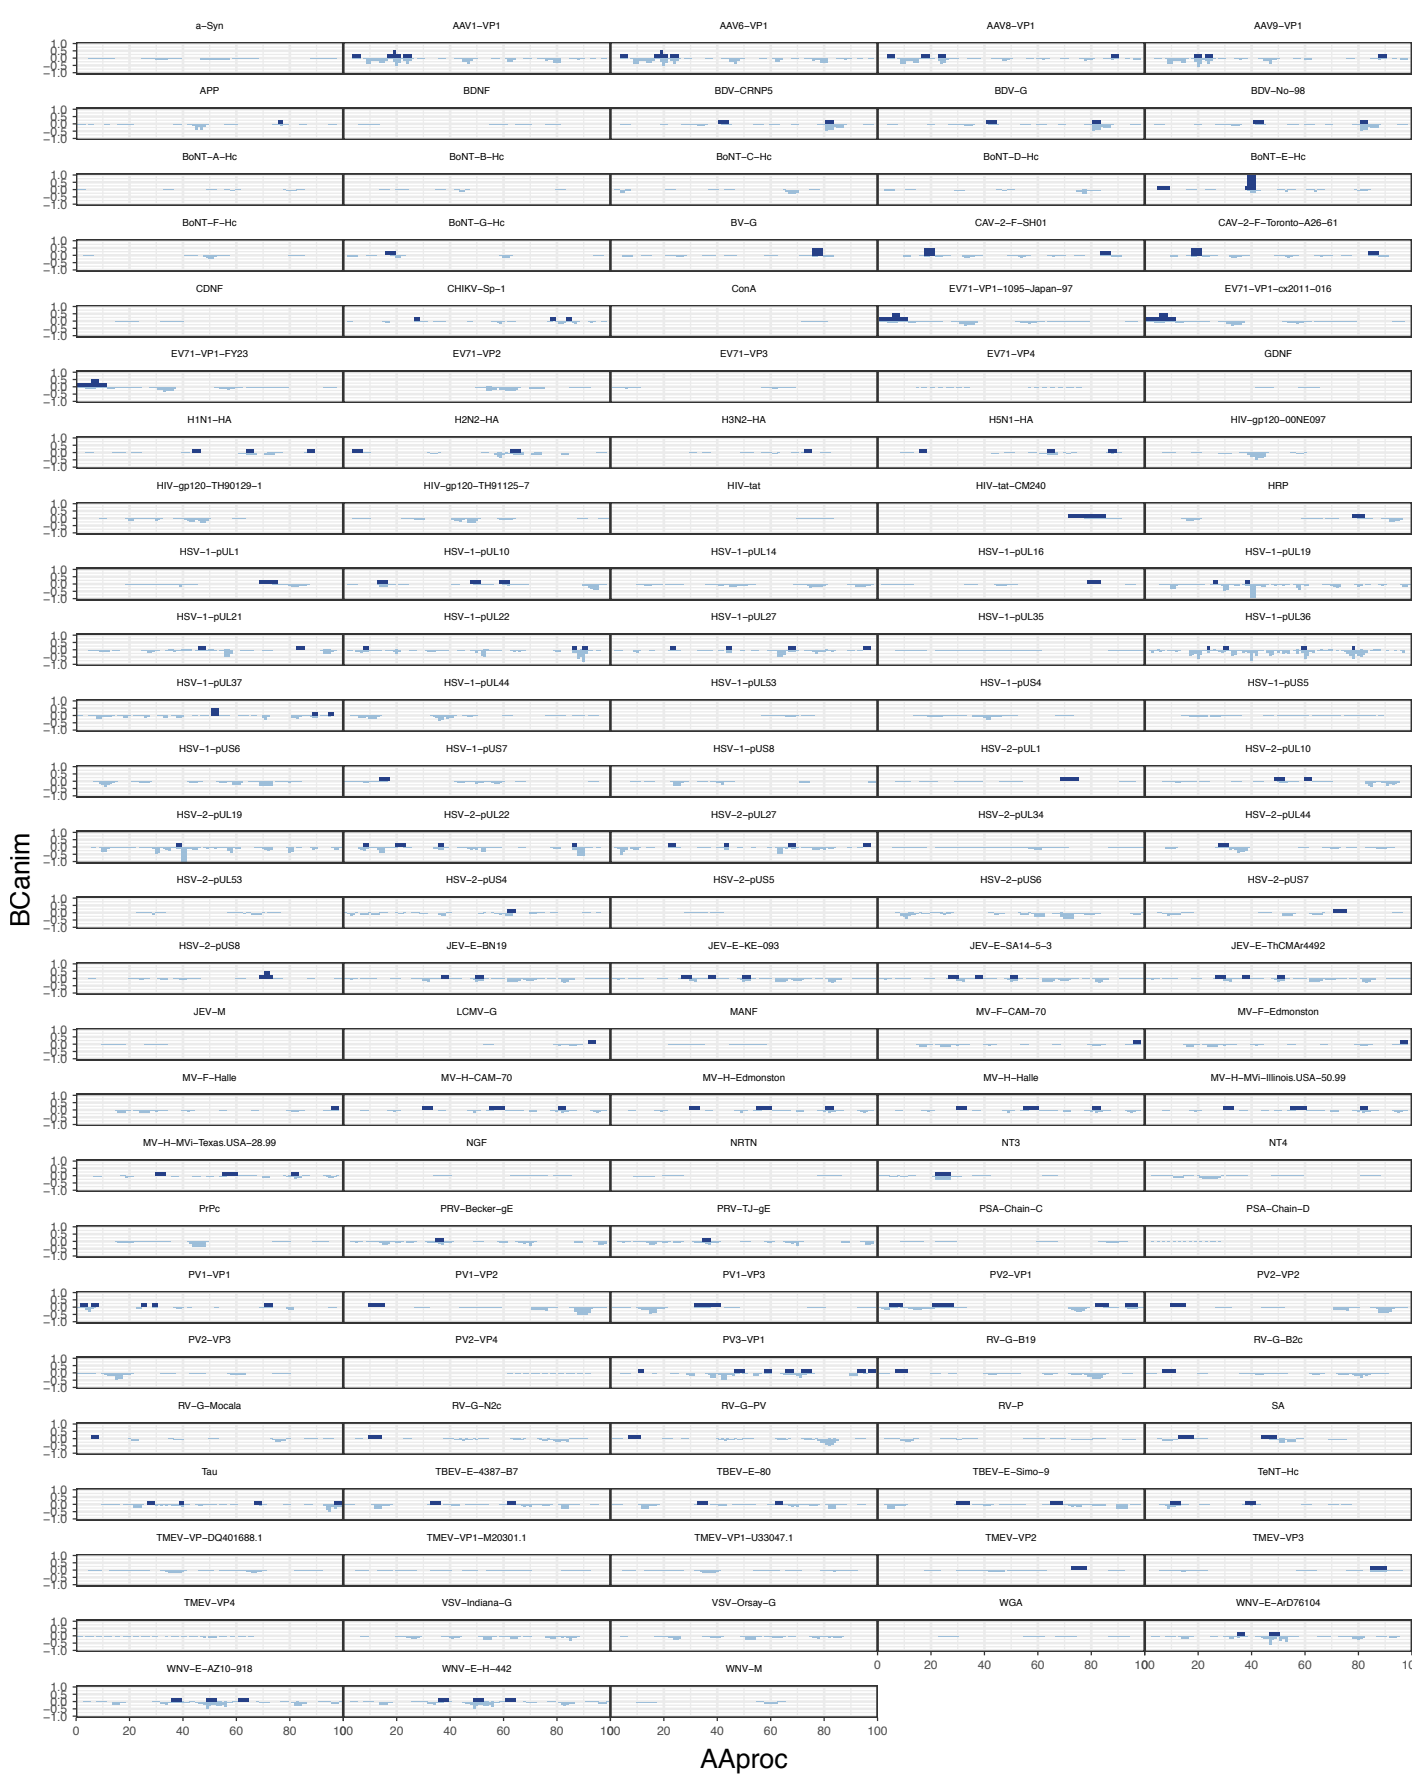

Library ■ mRNA\_30cpc\_SN ■ mRNA\_3cpc\_SN

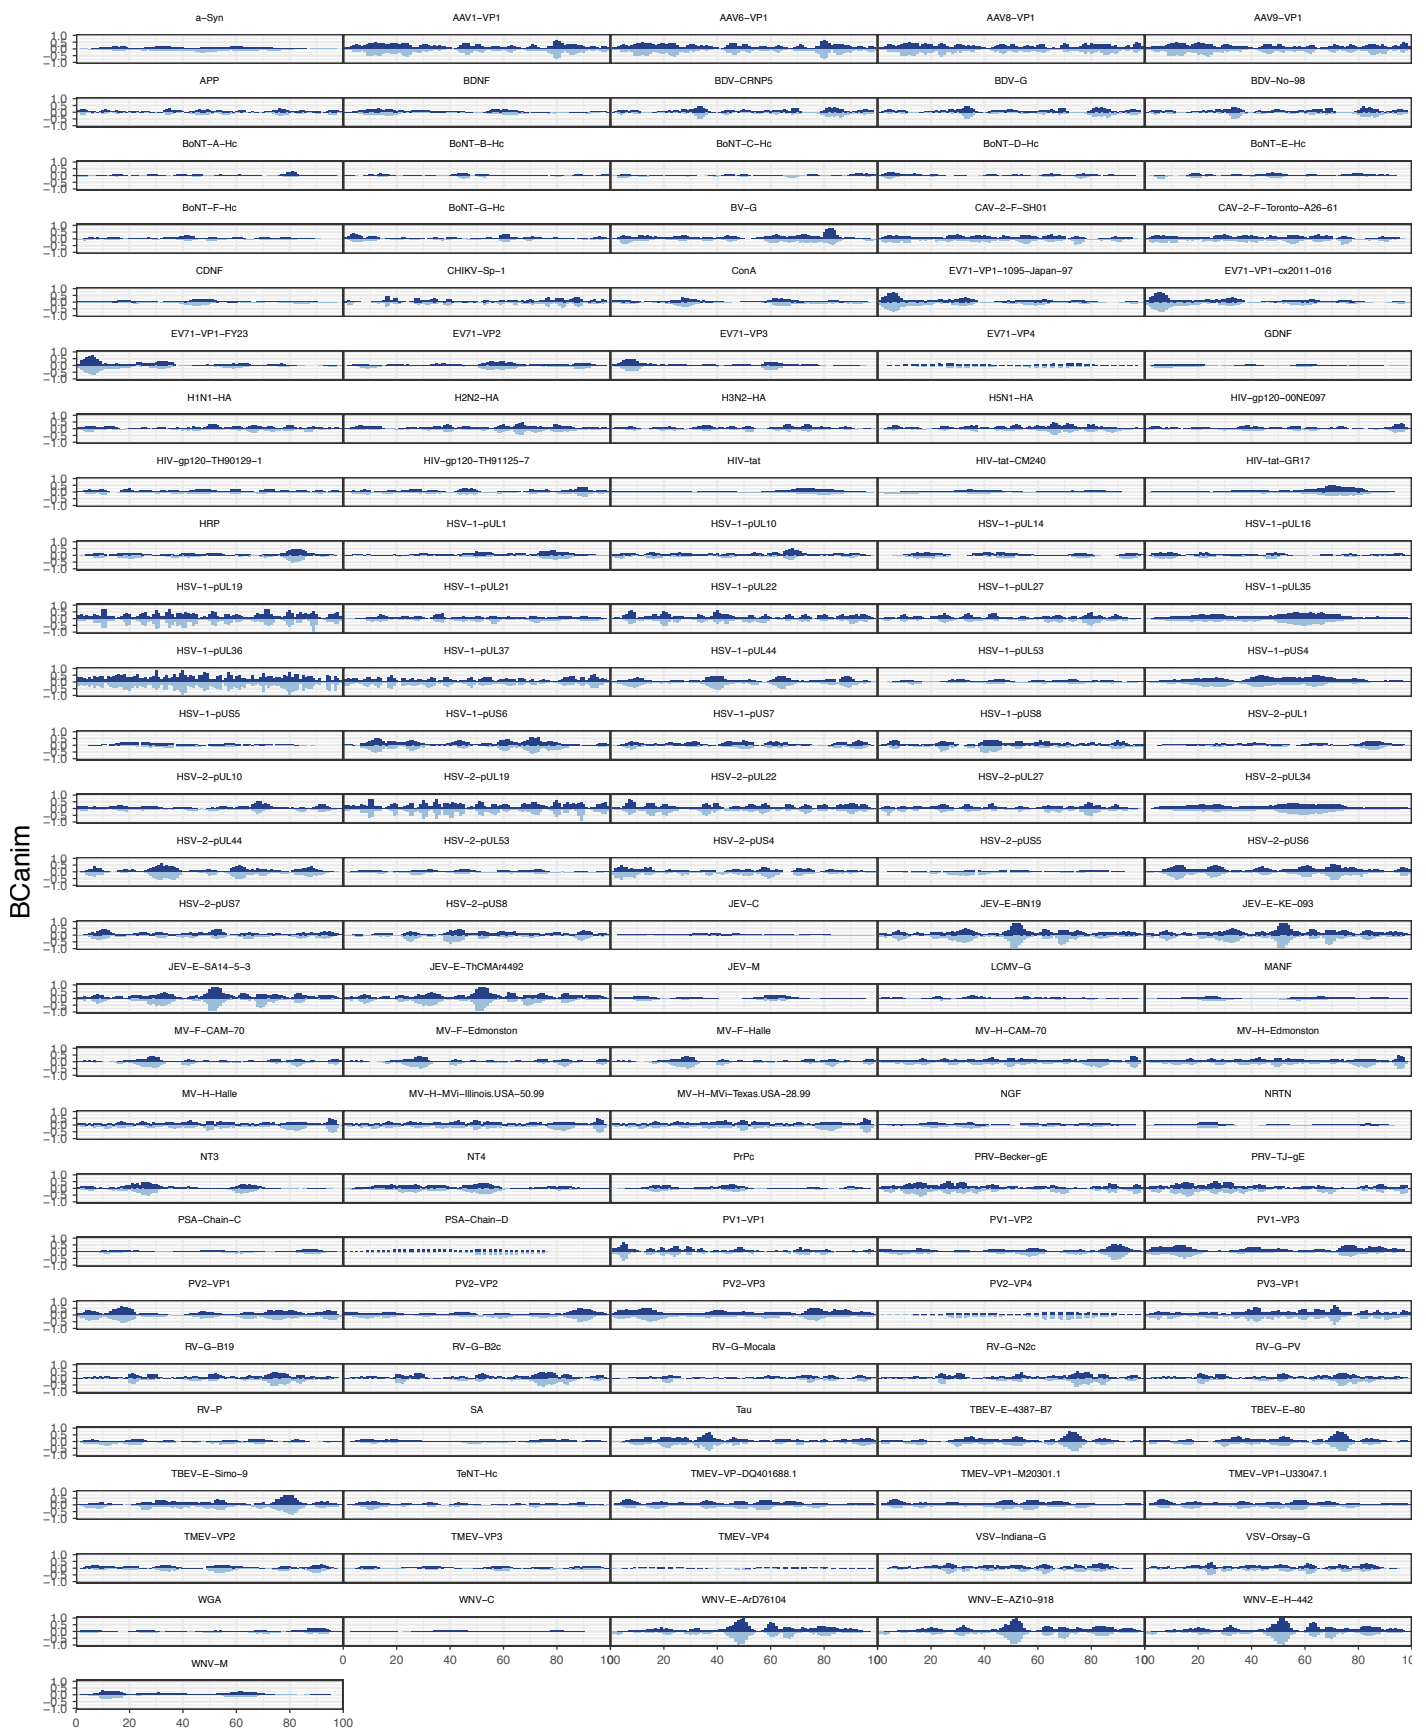

Aaproc

Library ■ mRNA\_30cpc\_Str ■ mRNA\_30cpc\_Str\_4wks

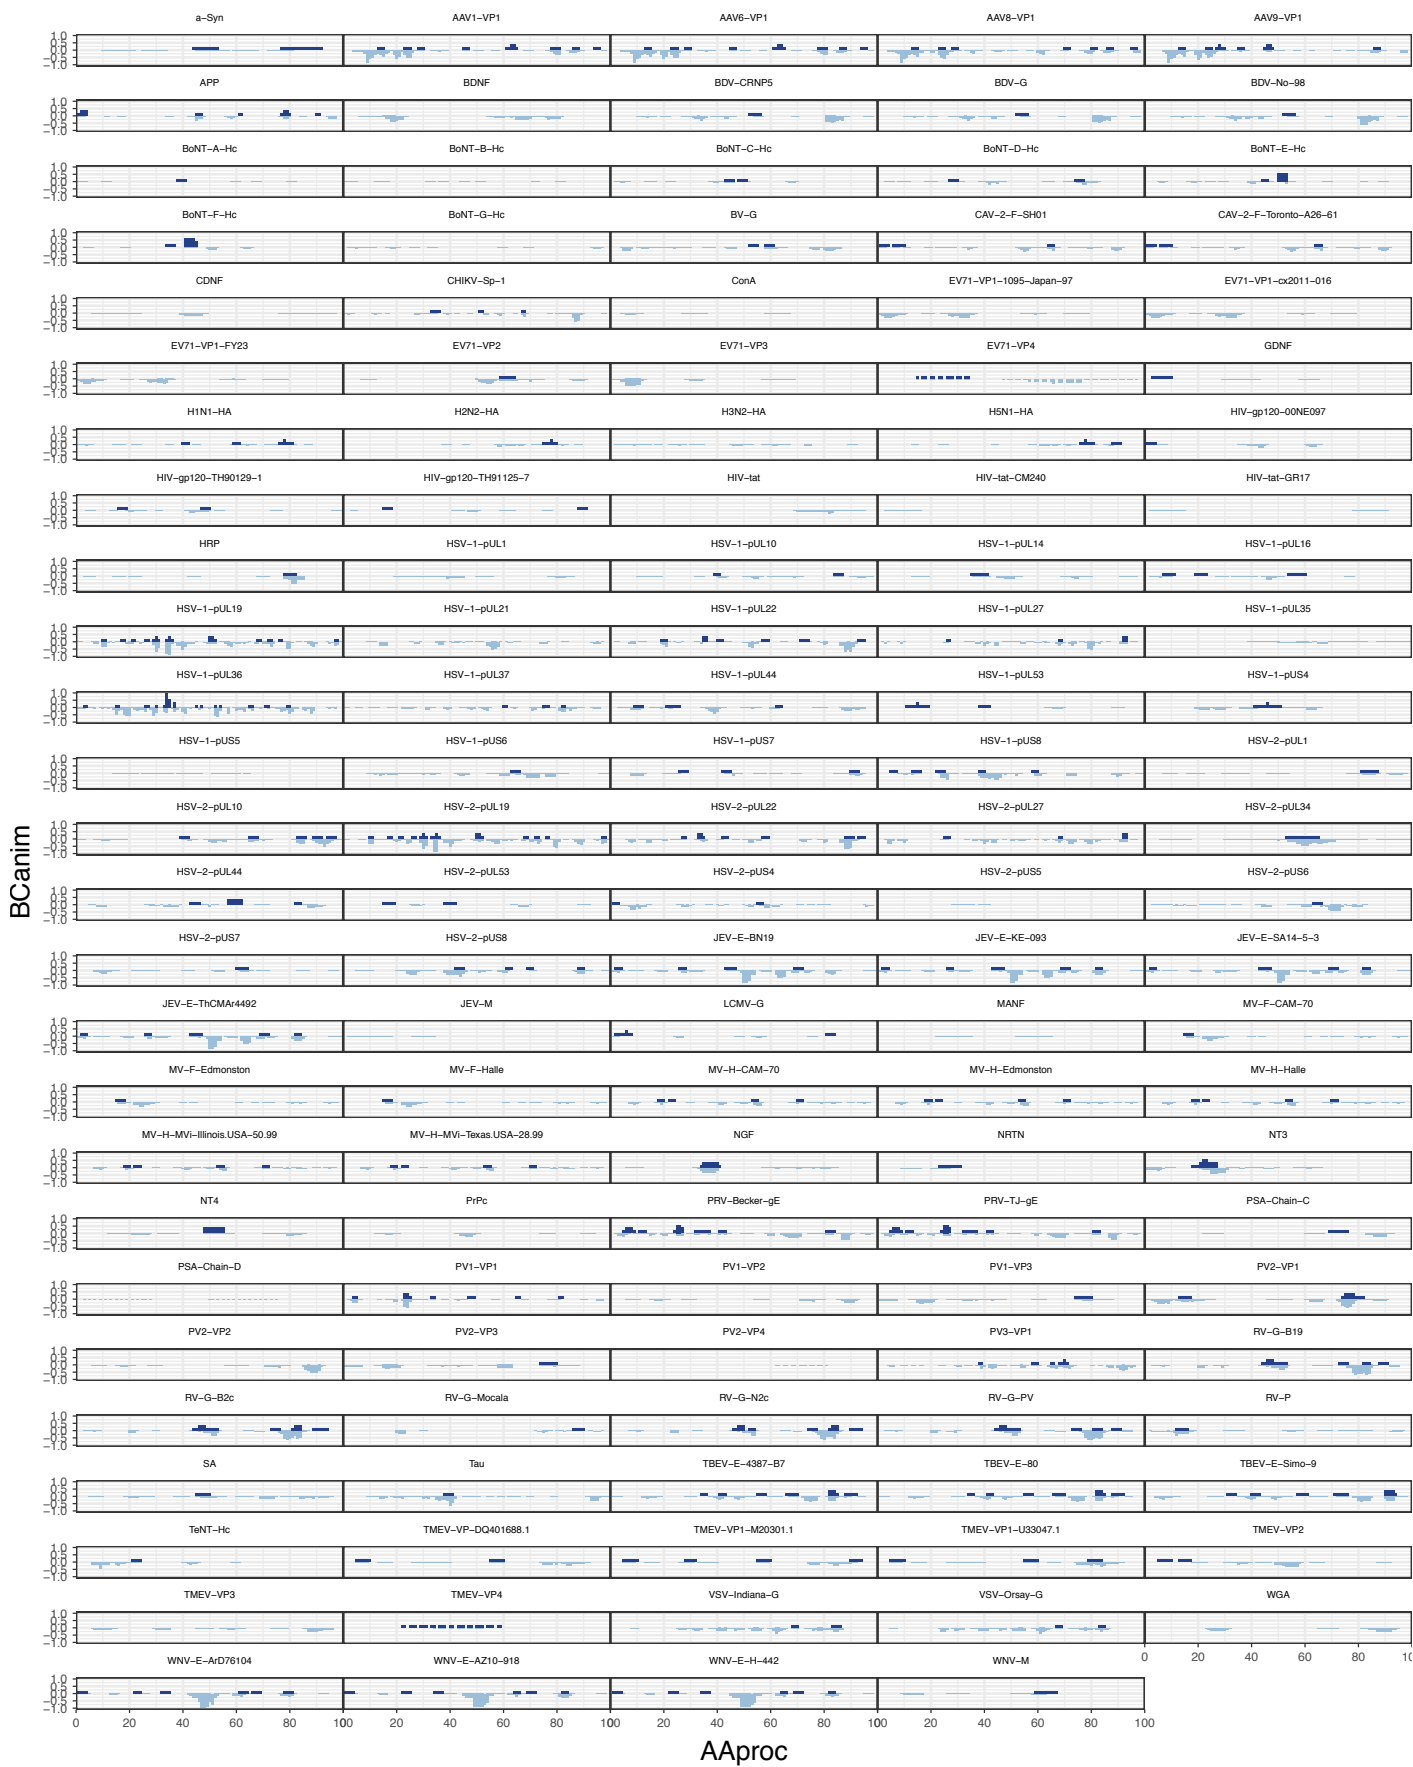

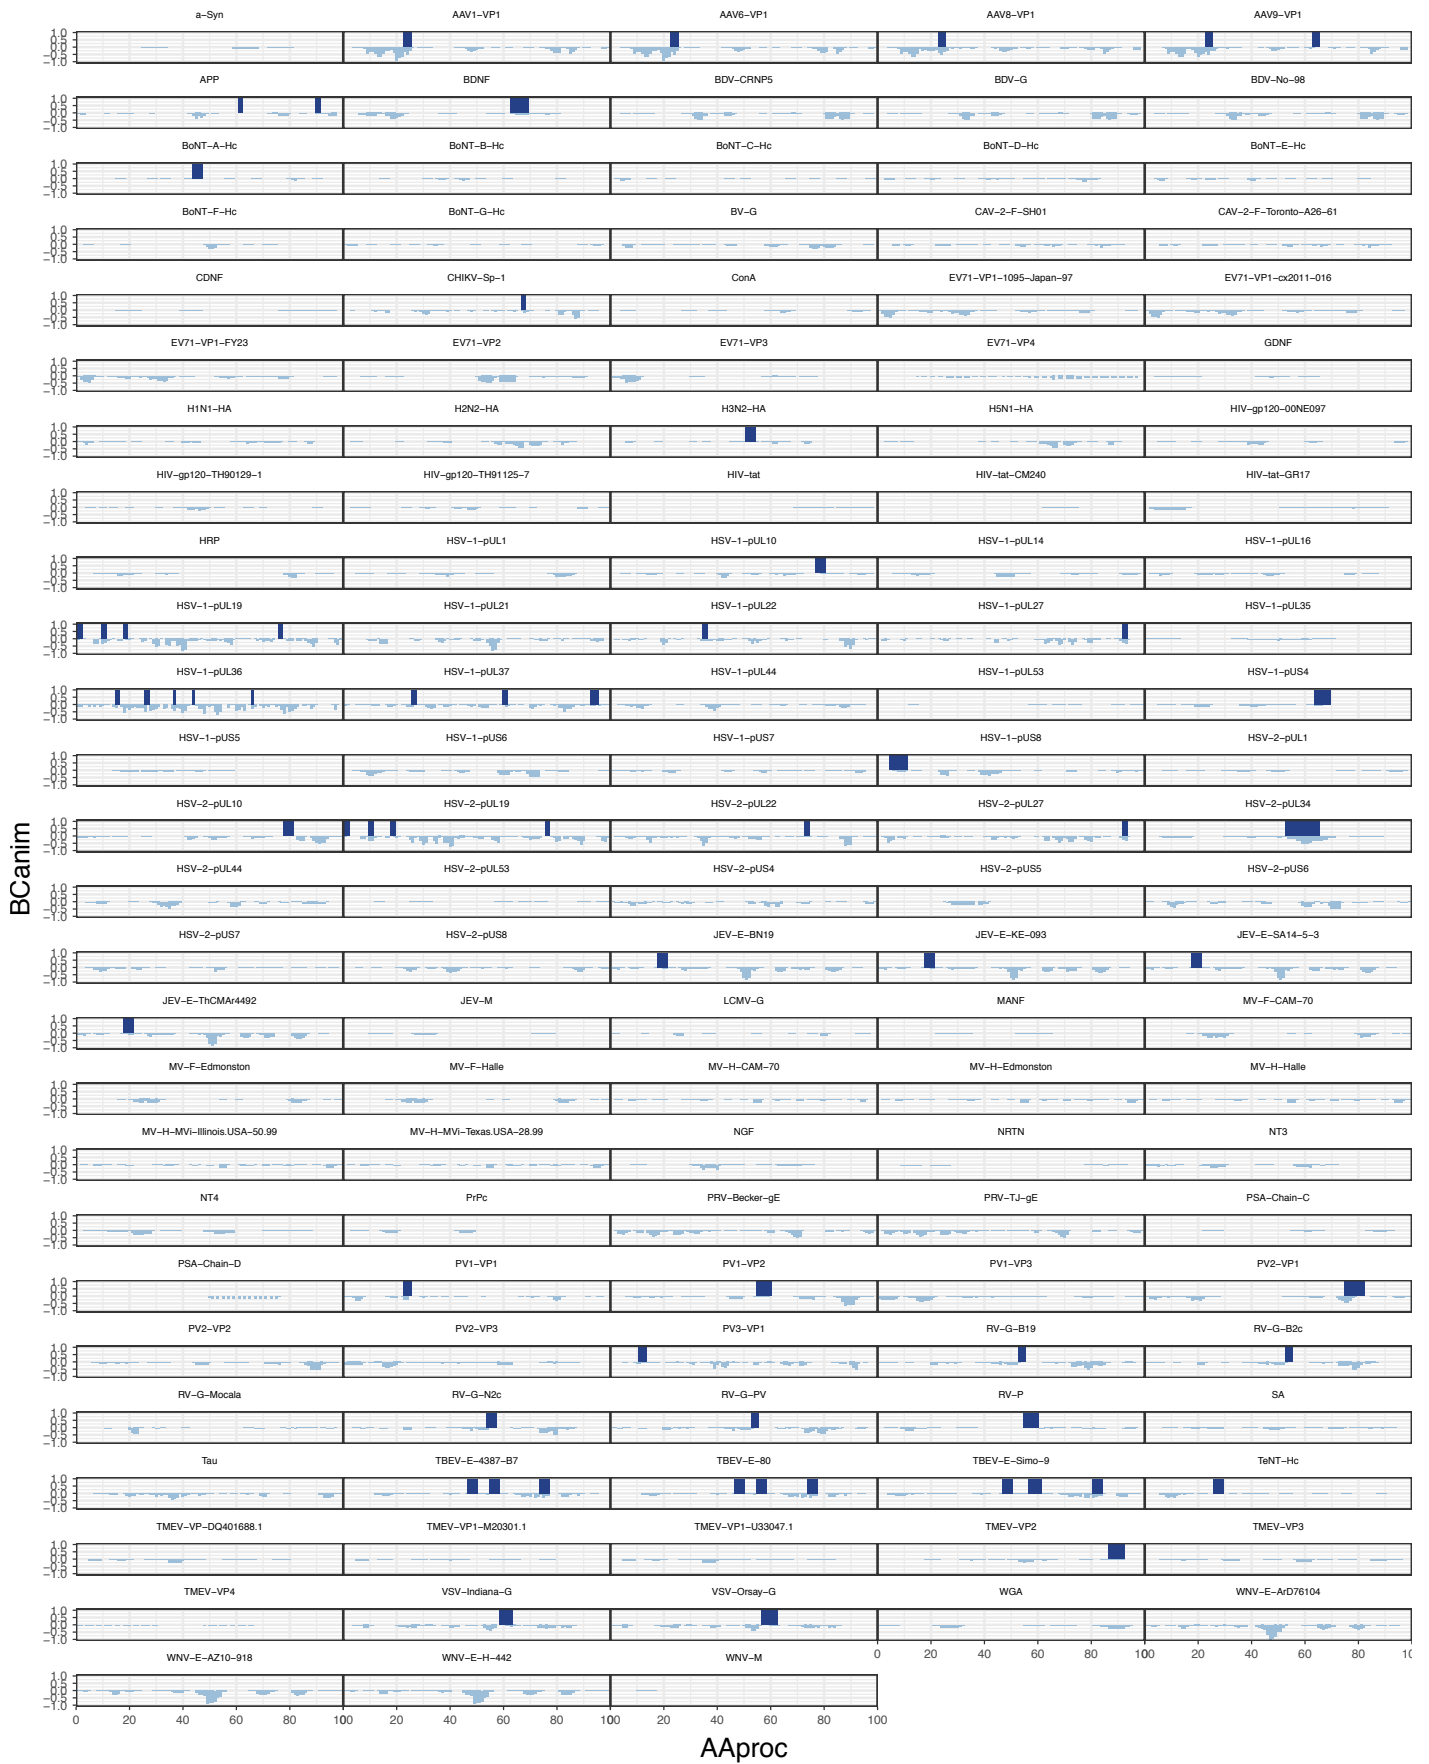

Library mRNA\_30cpc\_Ctx mRNA\_30cpc\_Ctx\_4wks

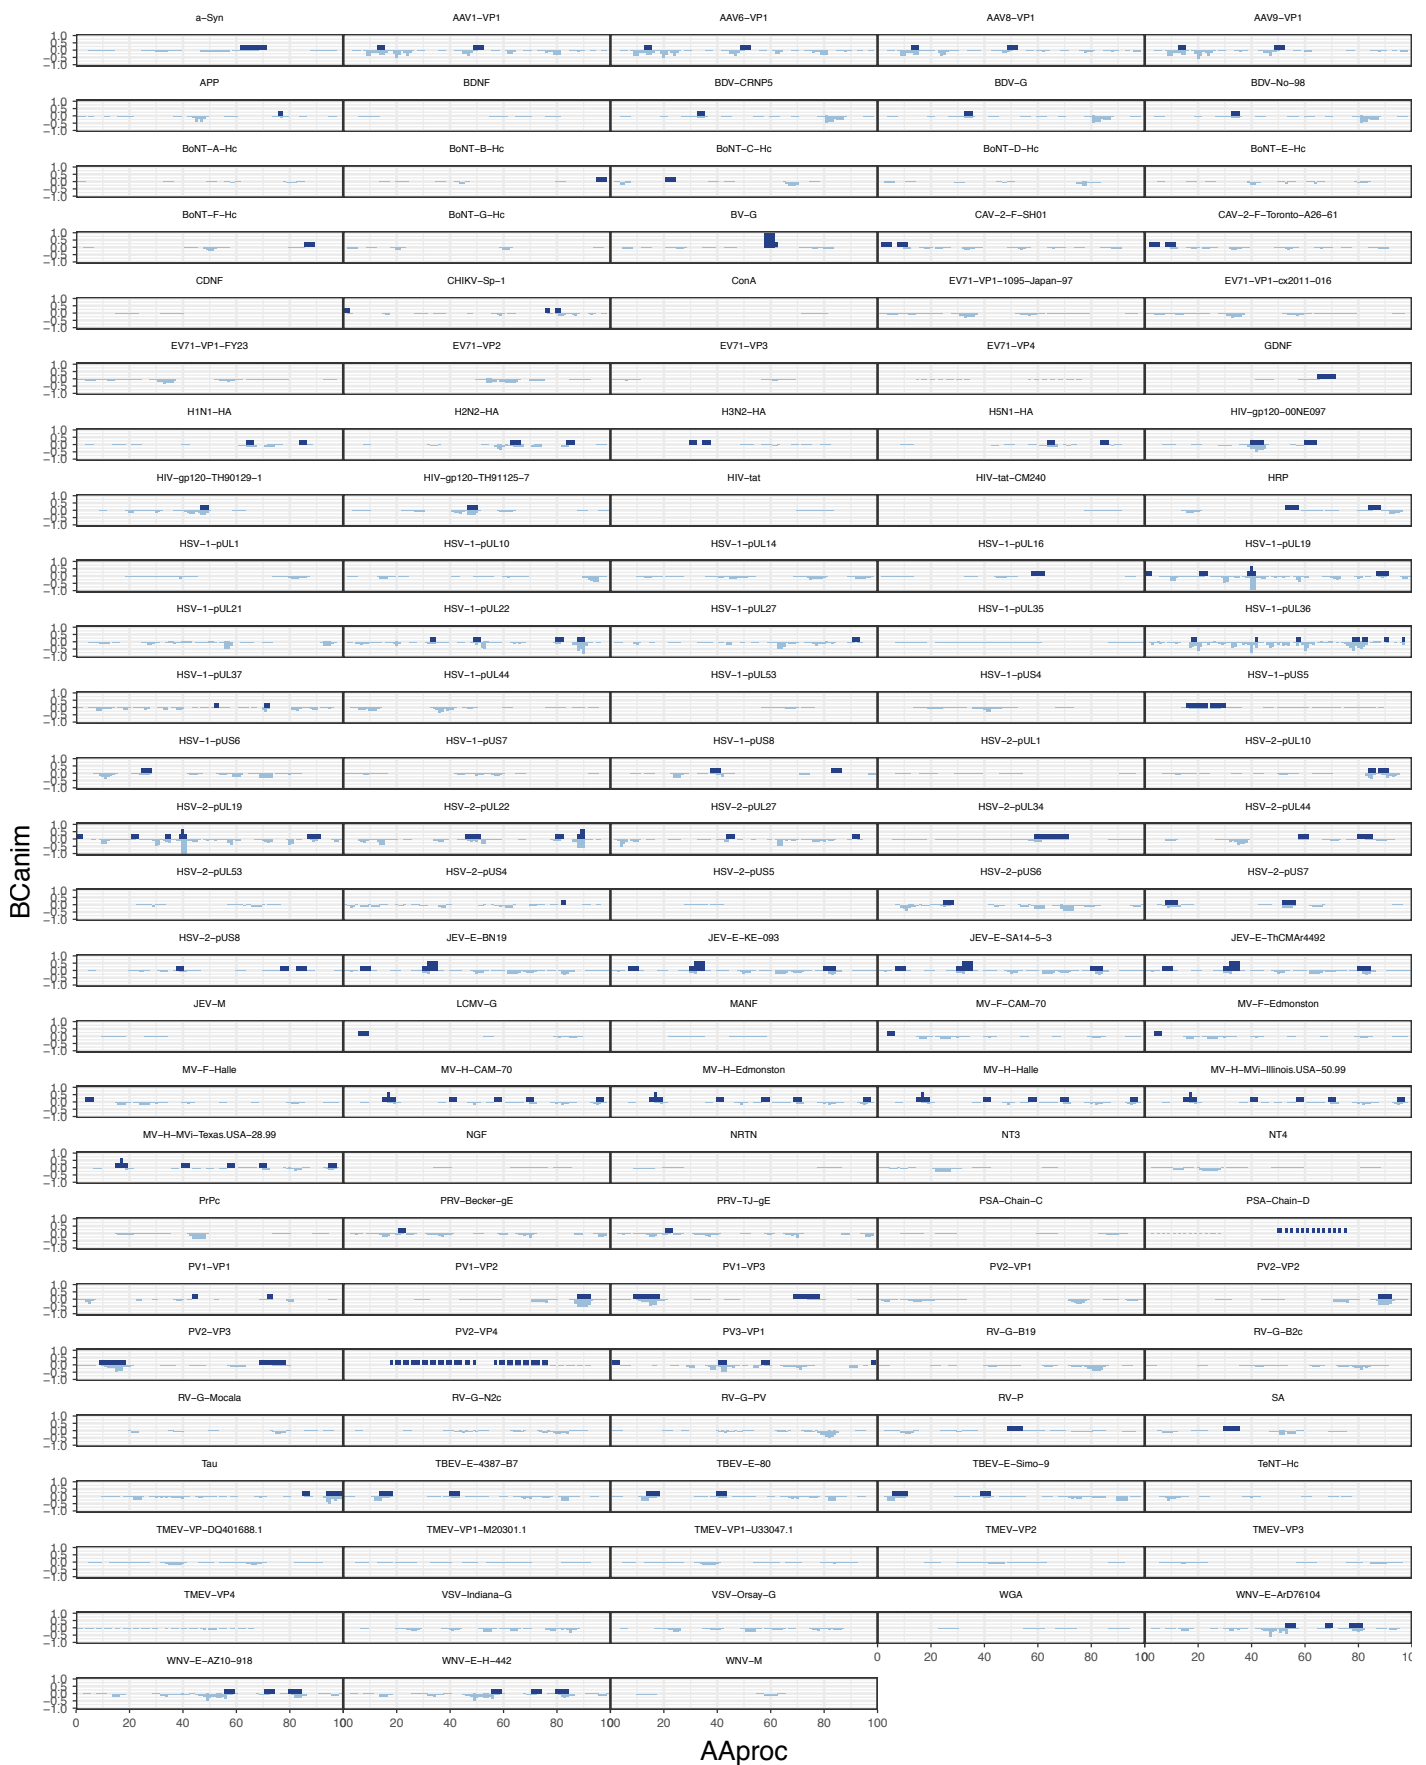

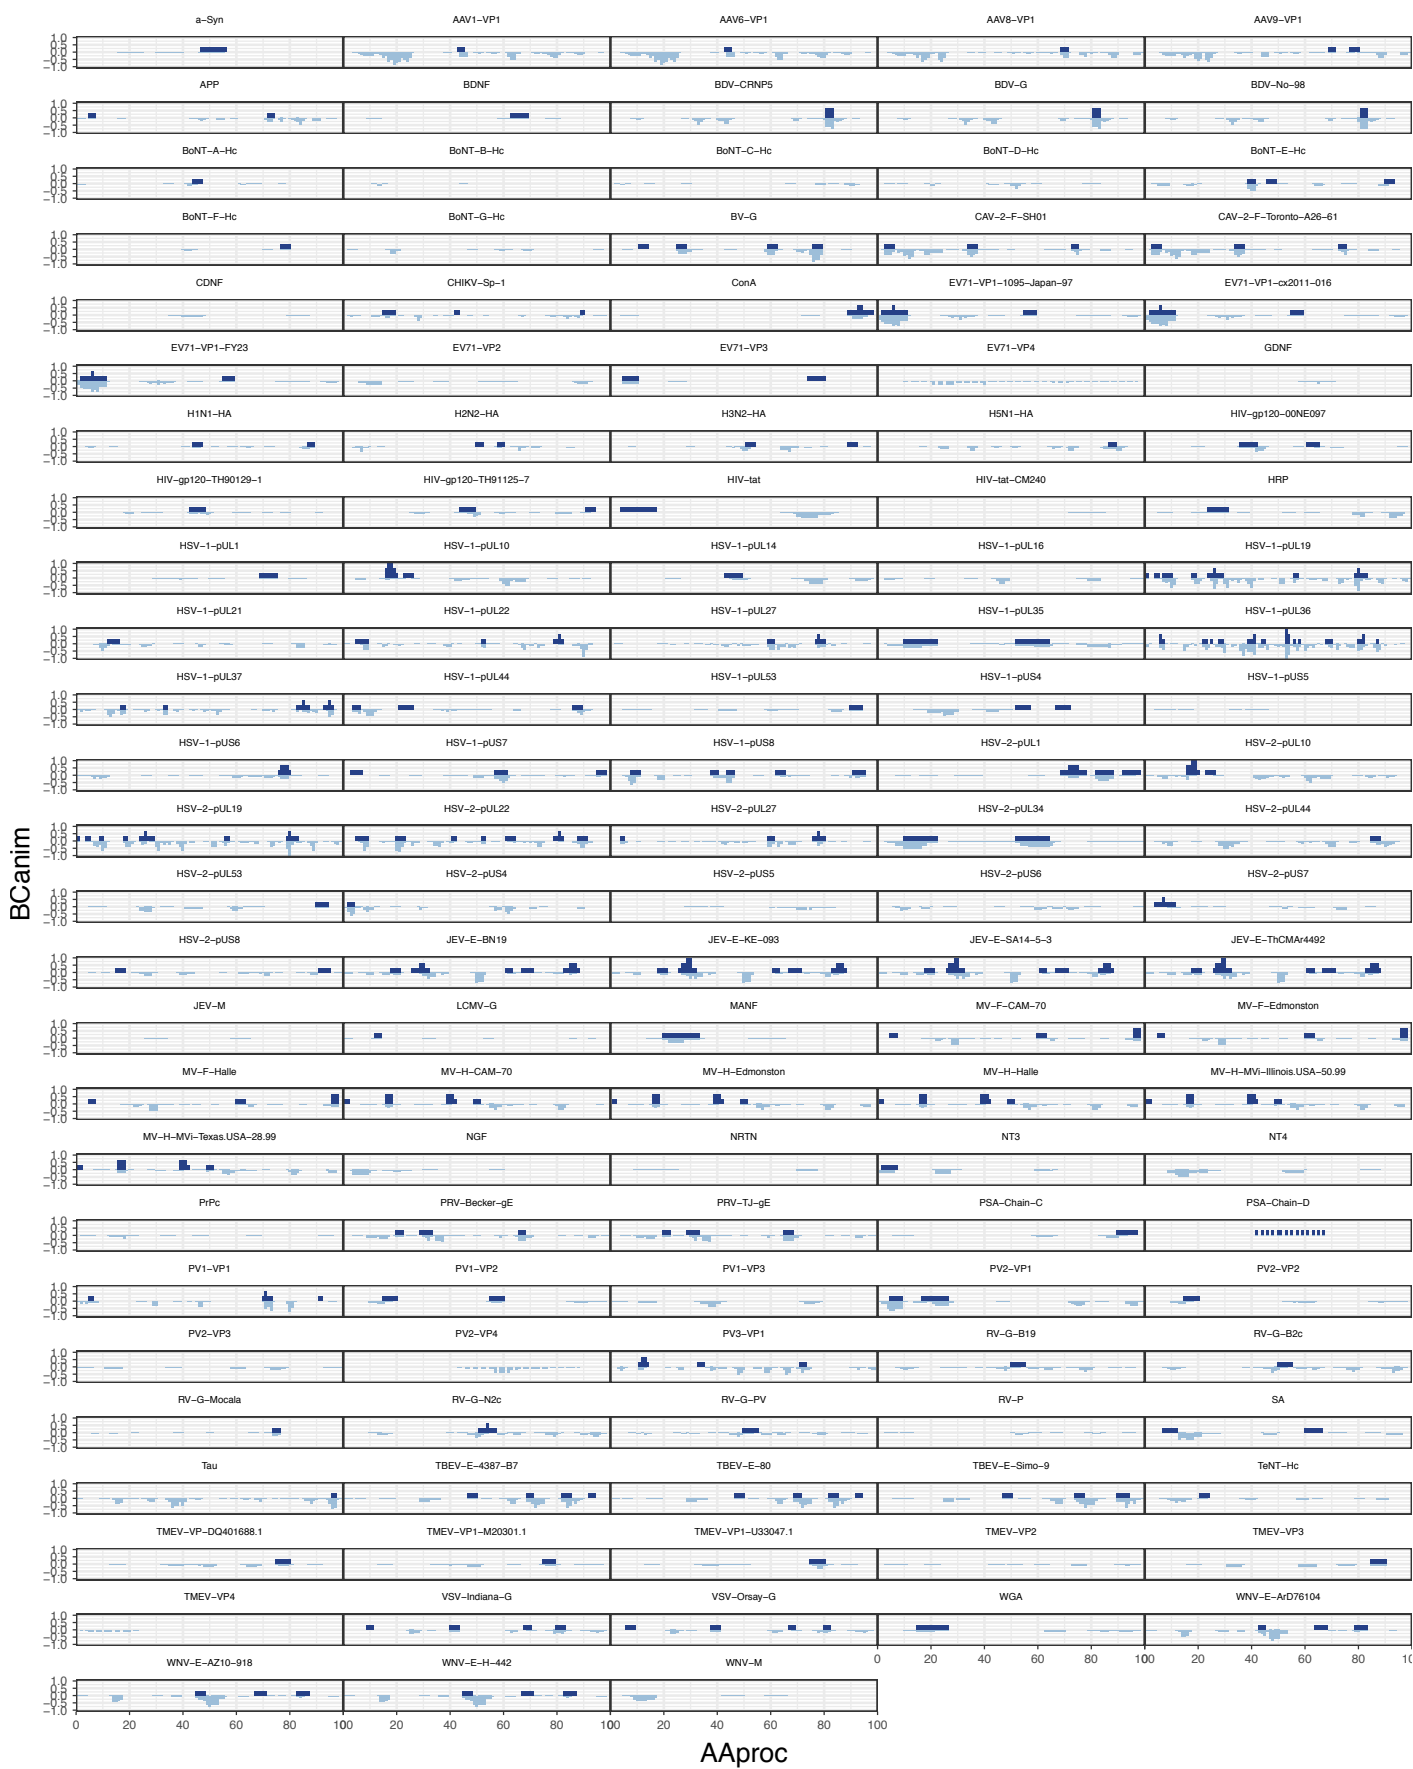



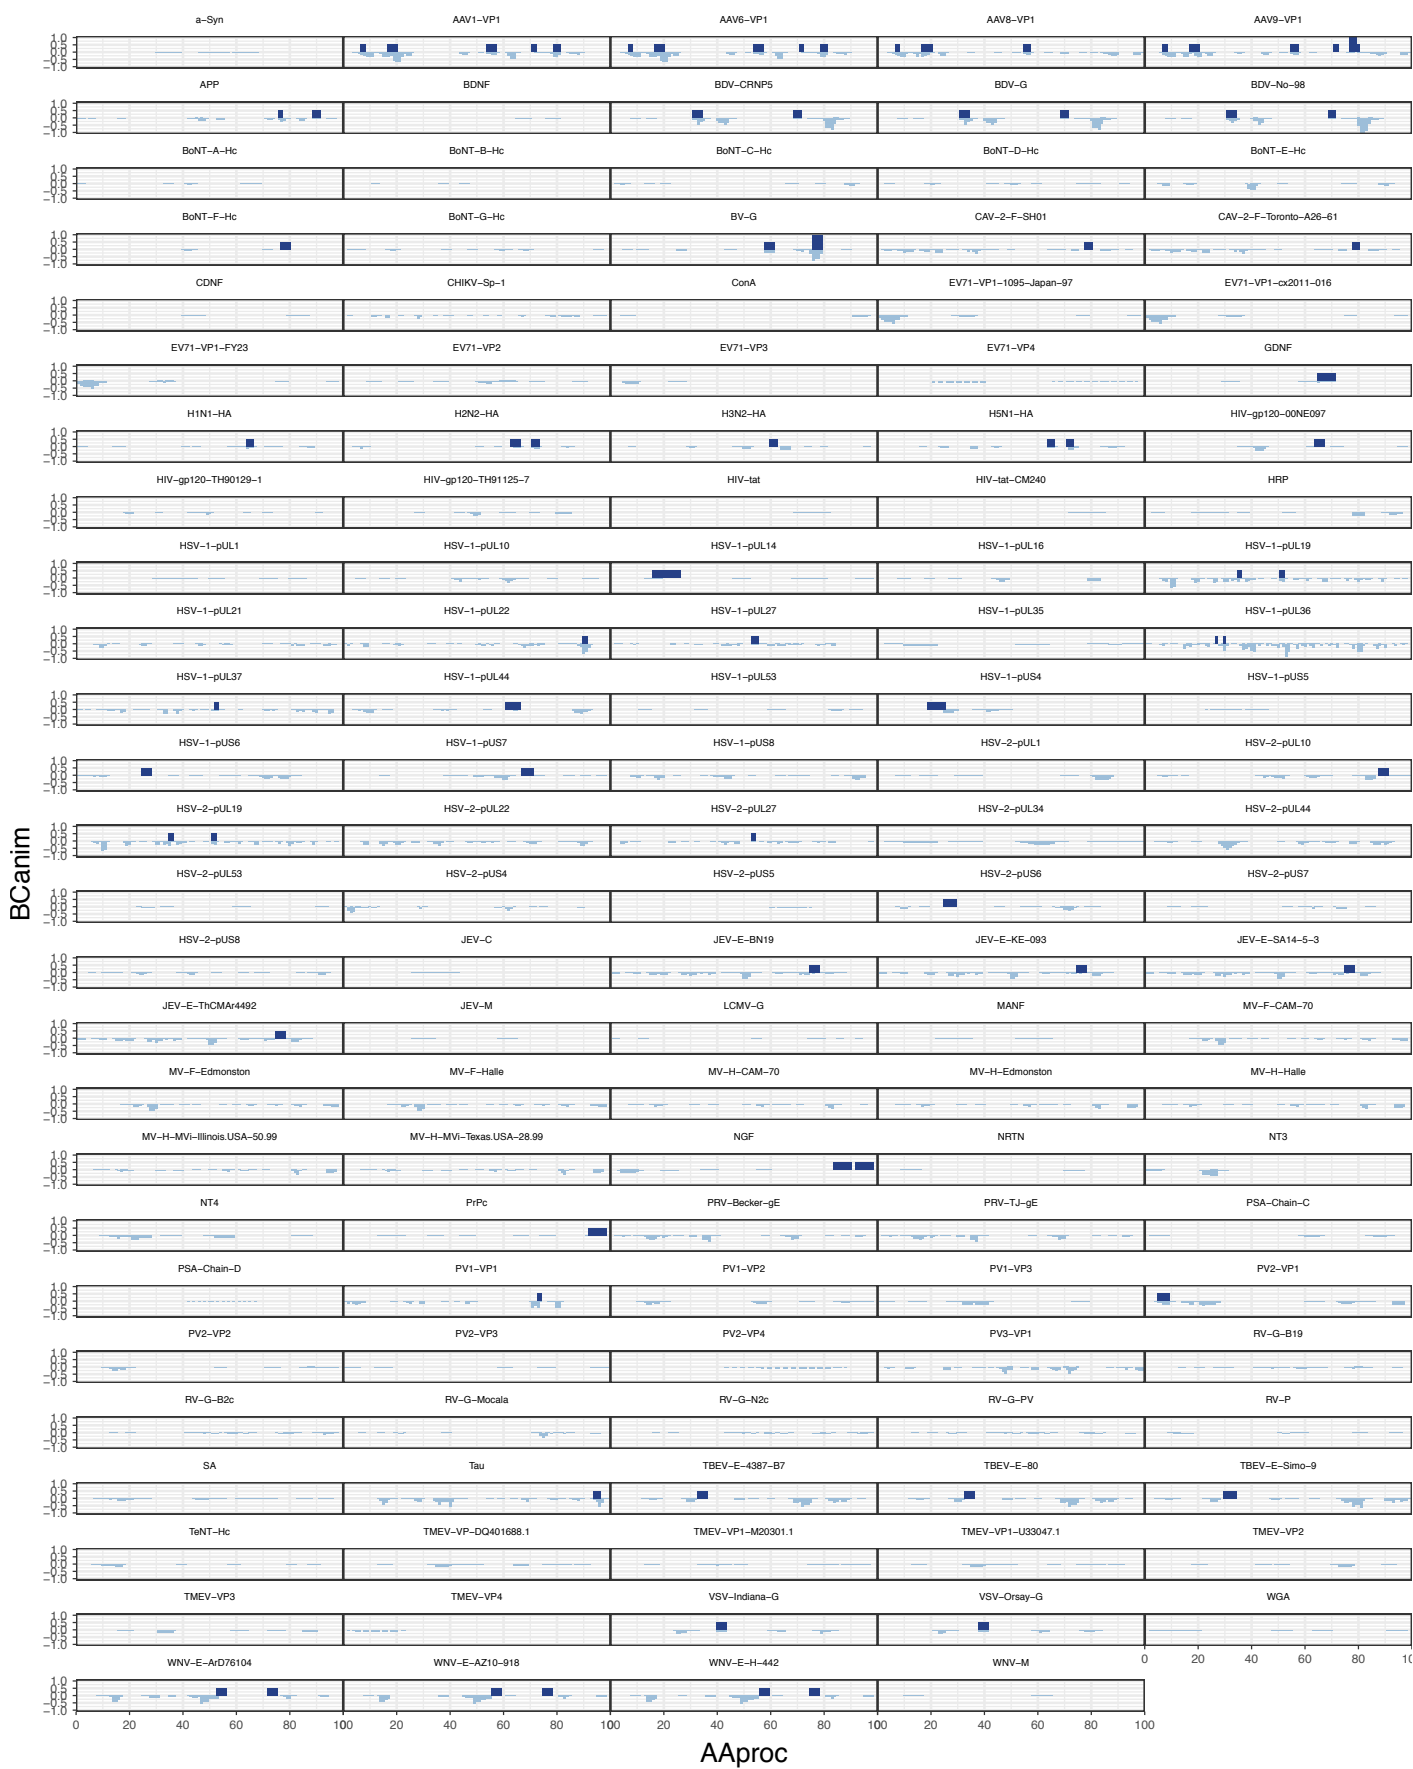

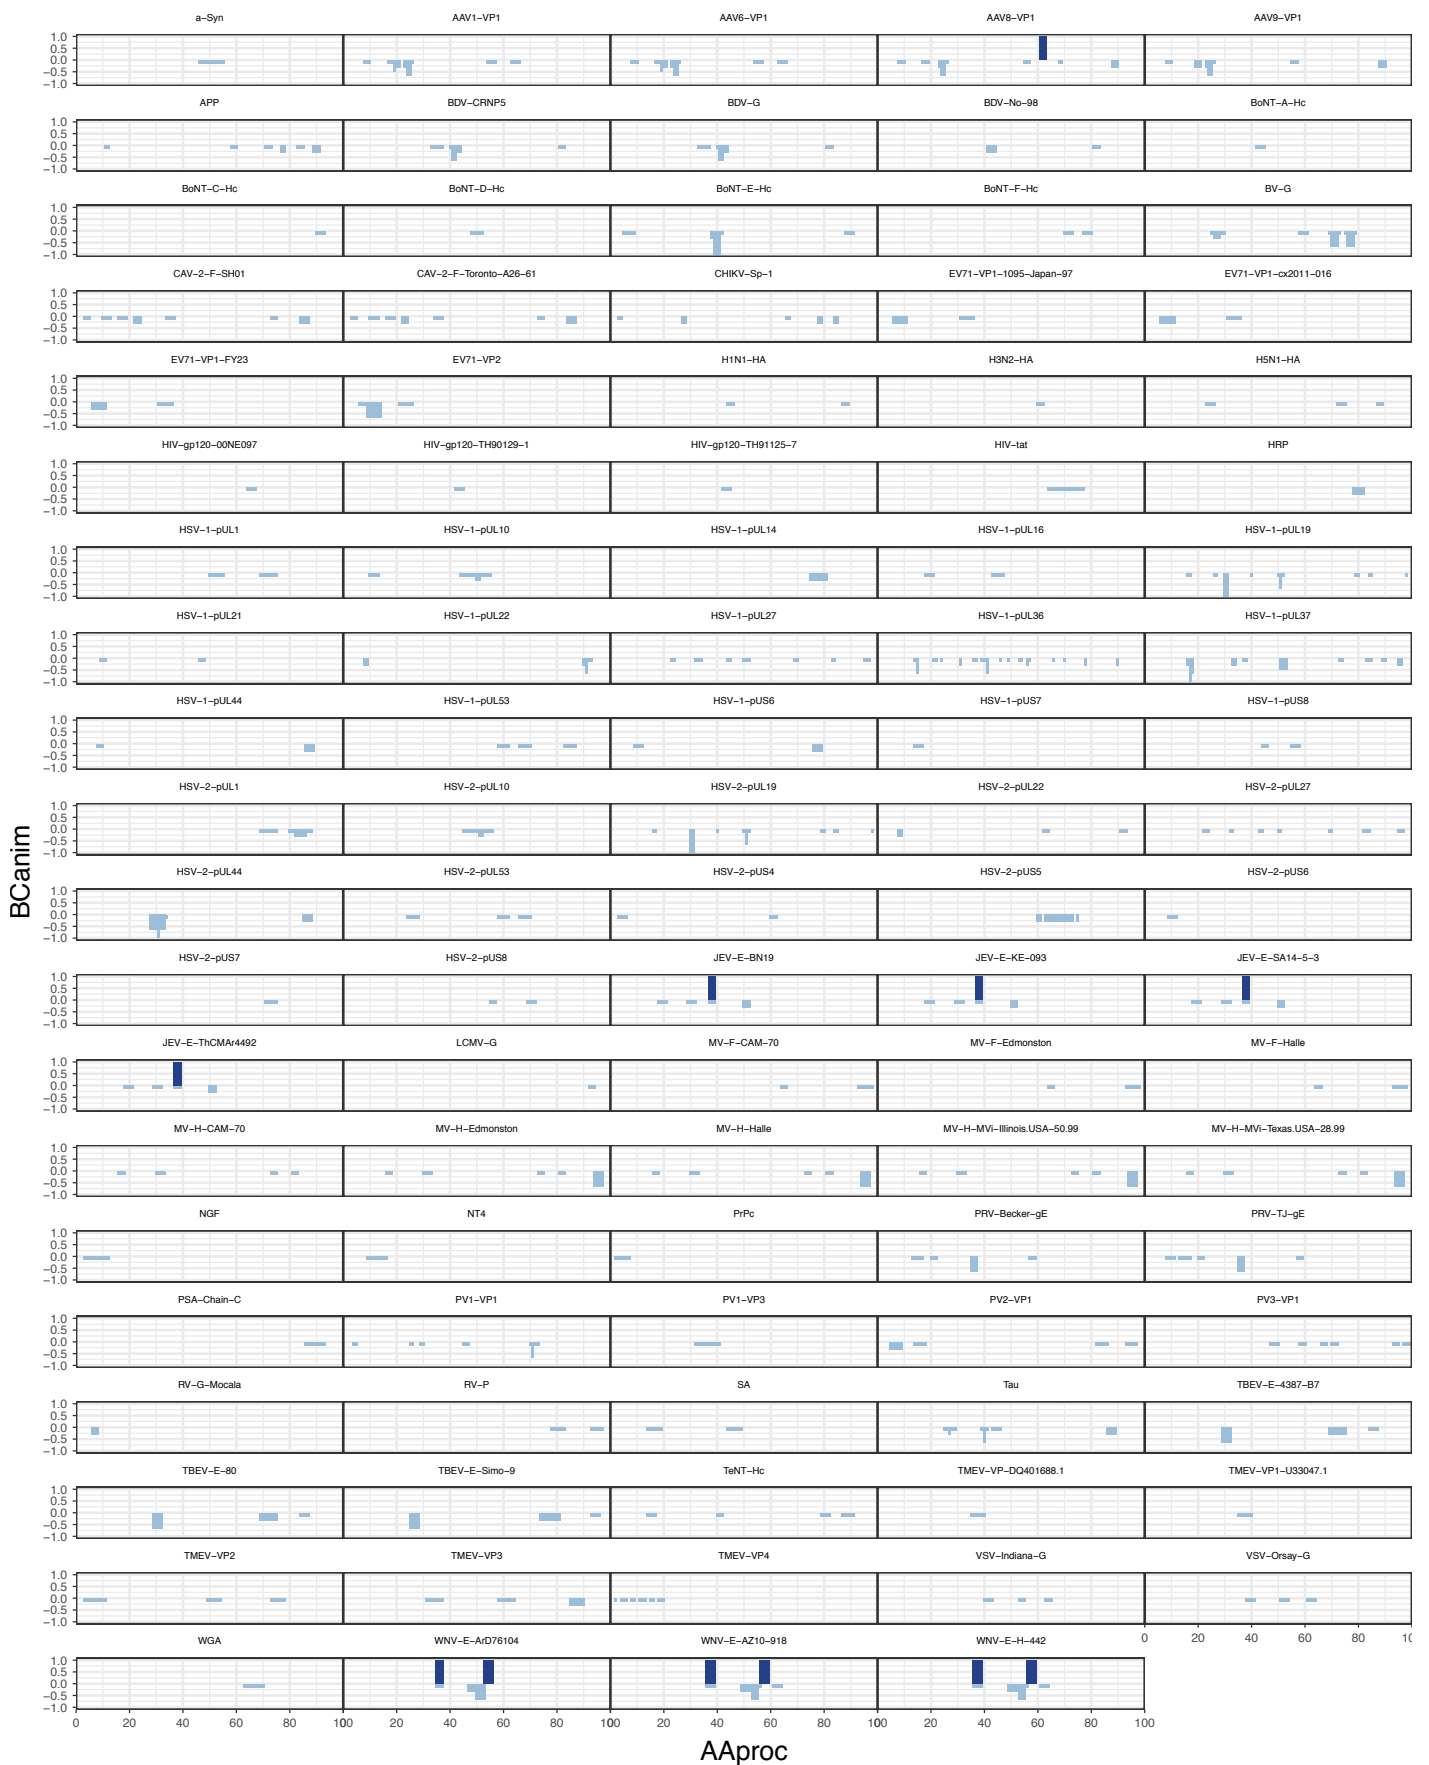

Library ■ mRNA\_3cpc\_Ctx ■ mRNA\_3cpc\_Ctx\_4wks

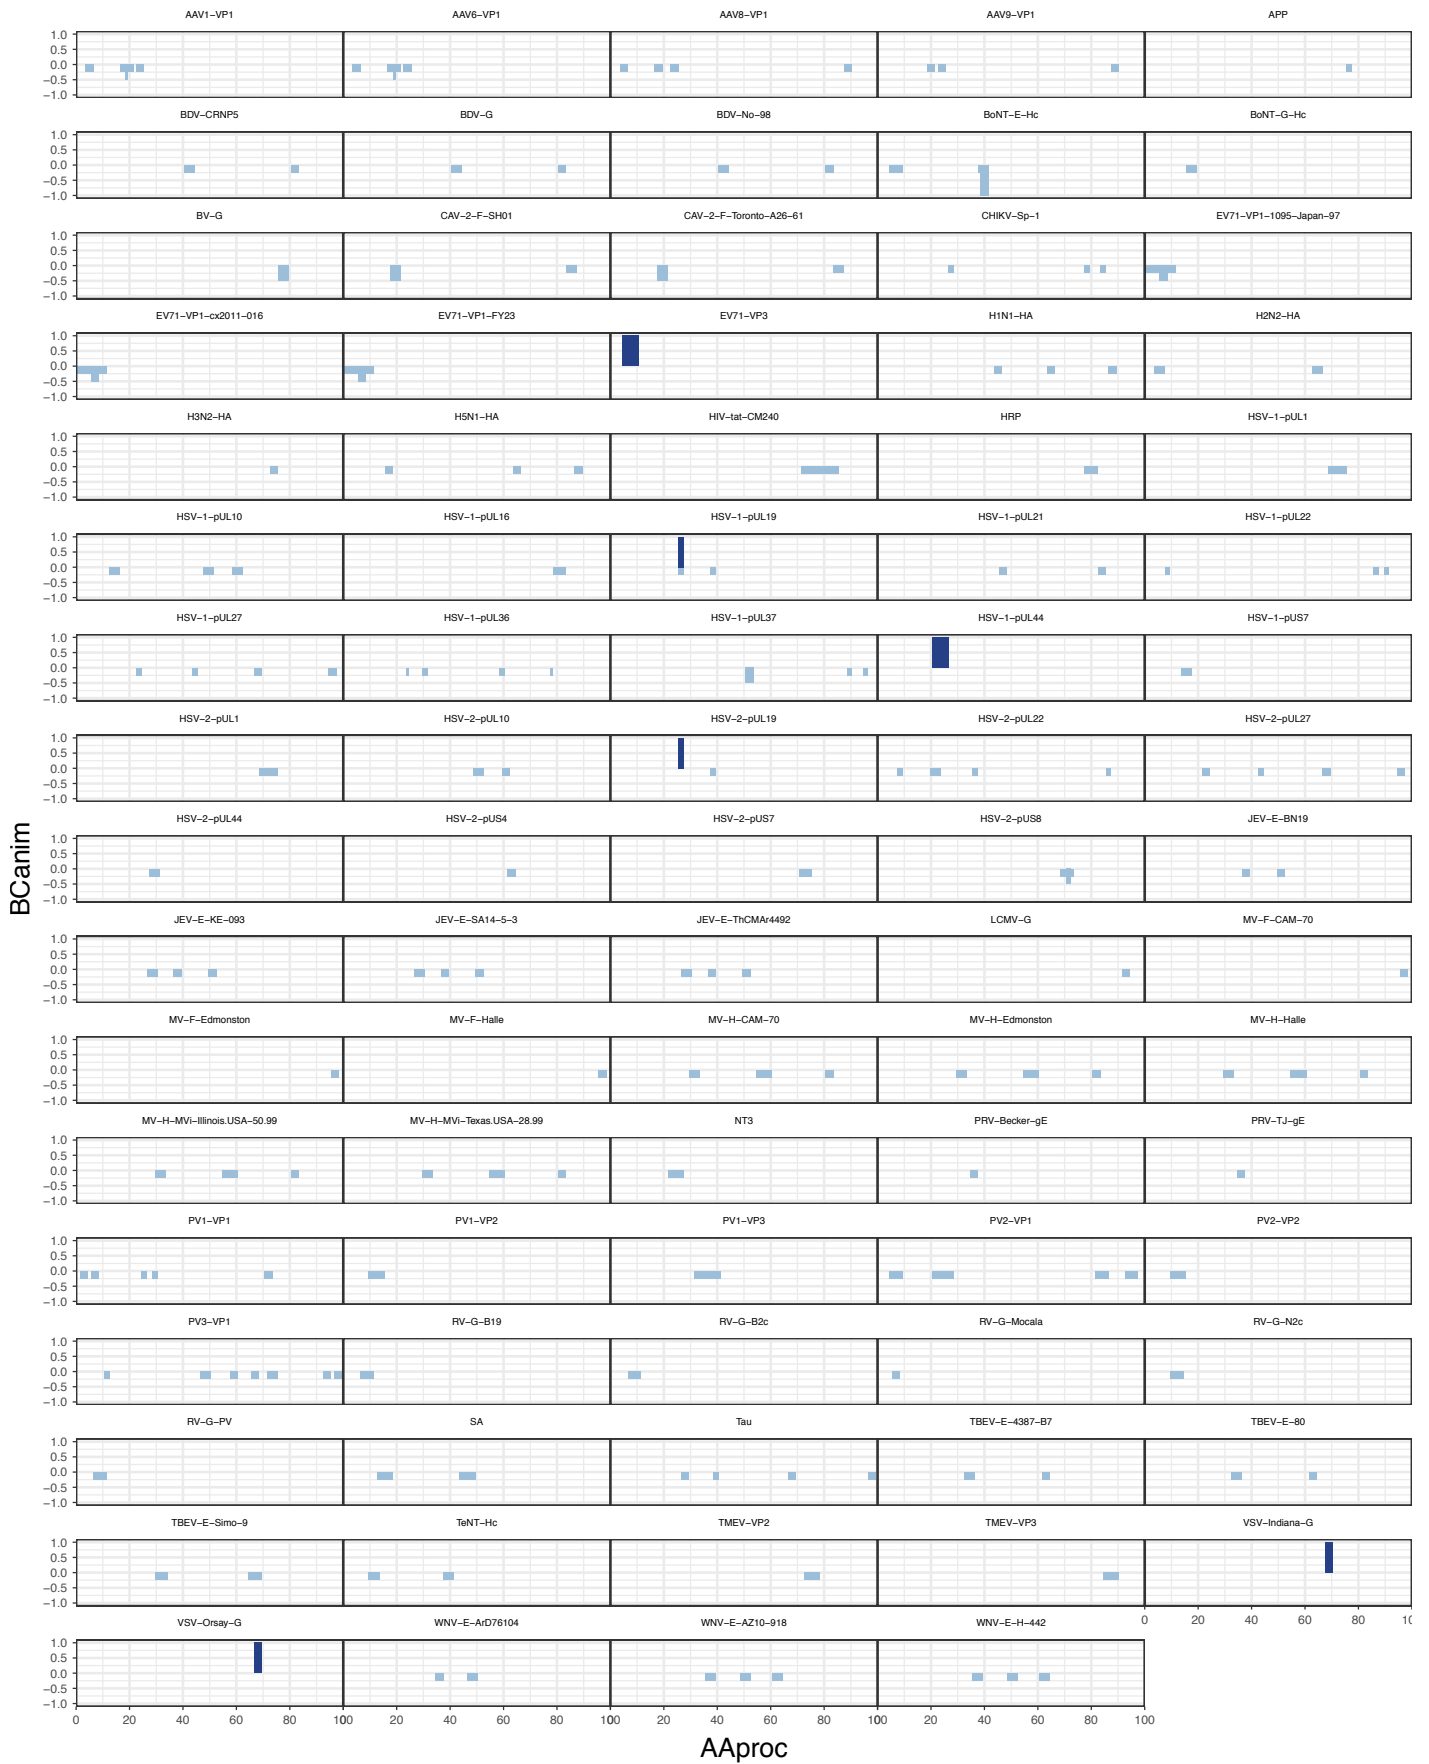

Library ■ mRNA\_3cpc\_SN ■ mRNA\_3cpc\_SN\_4wks

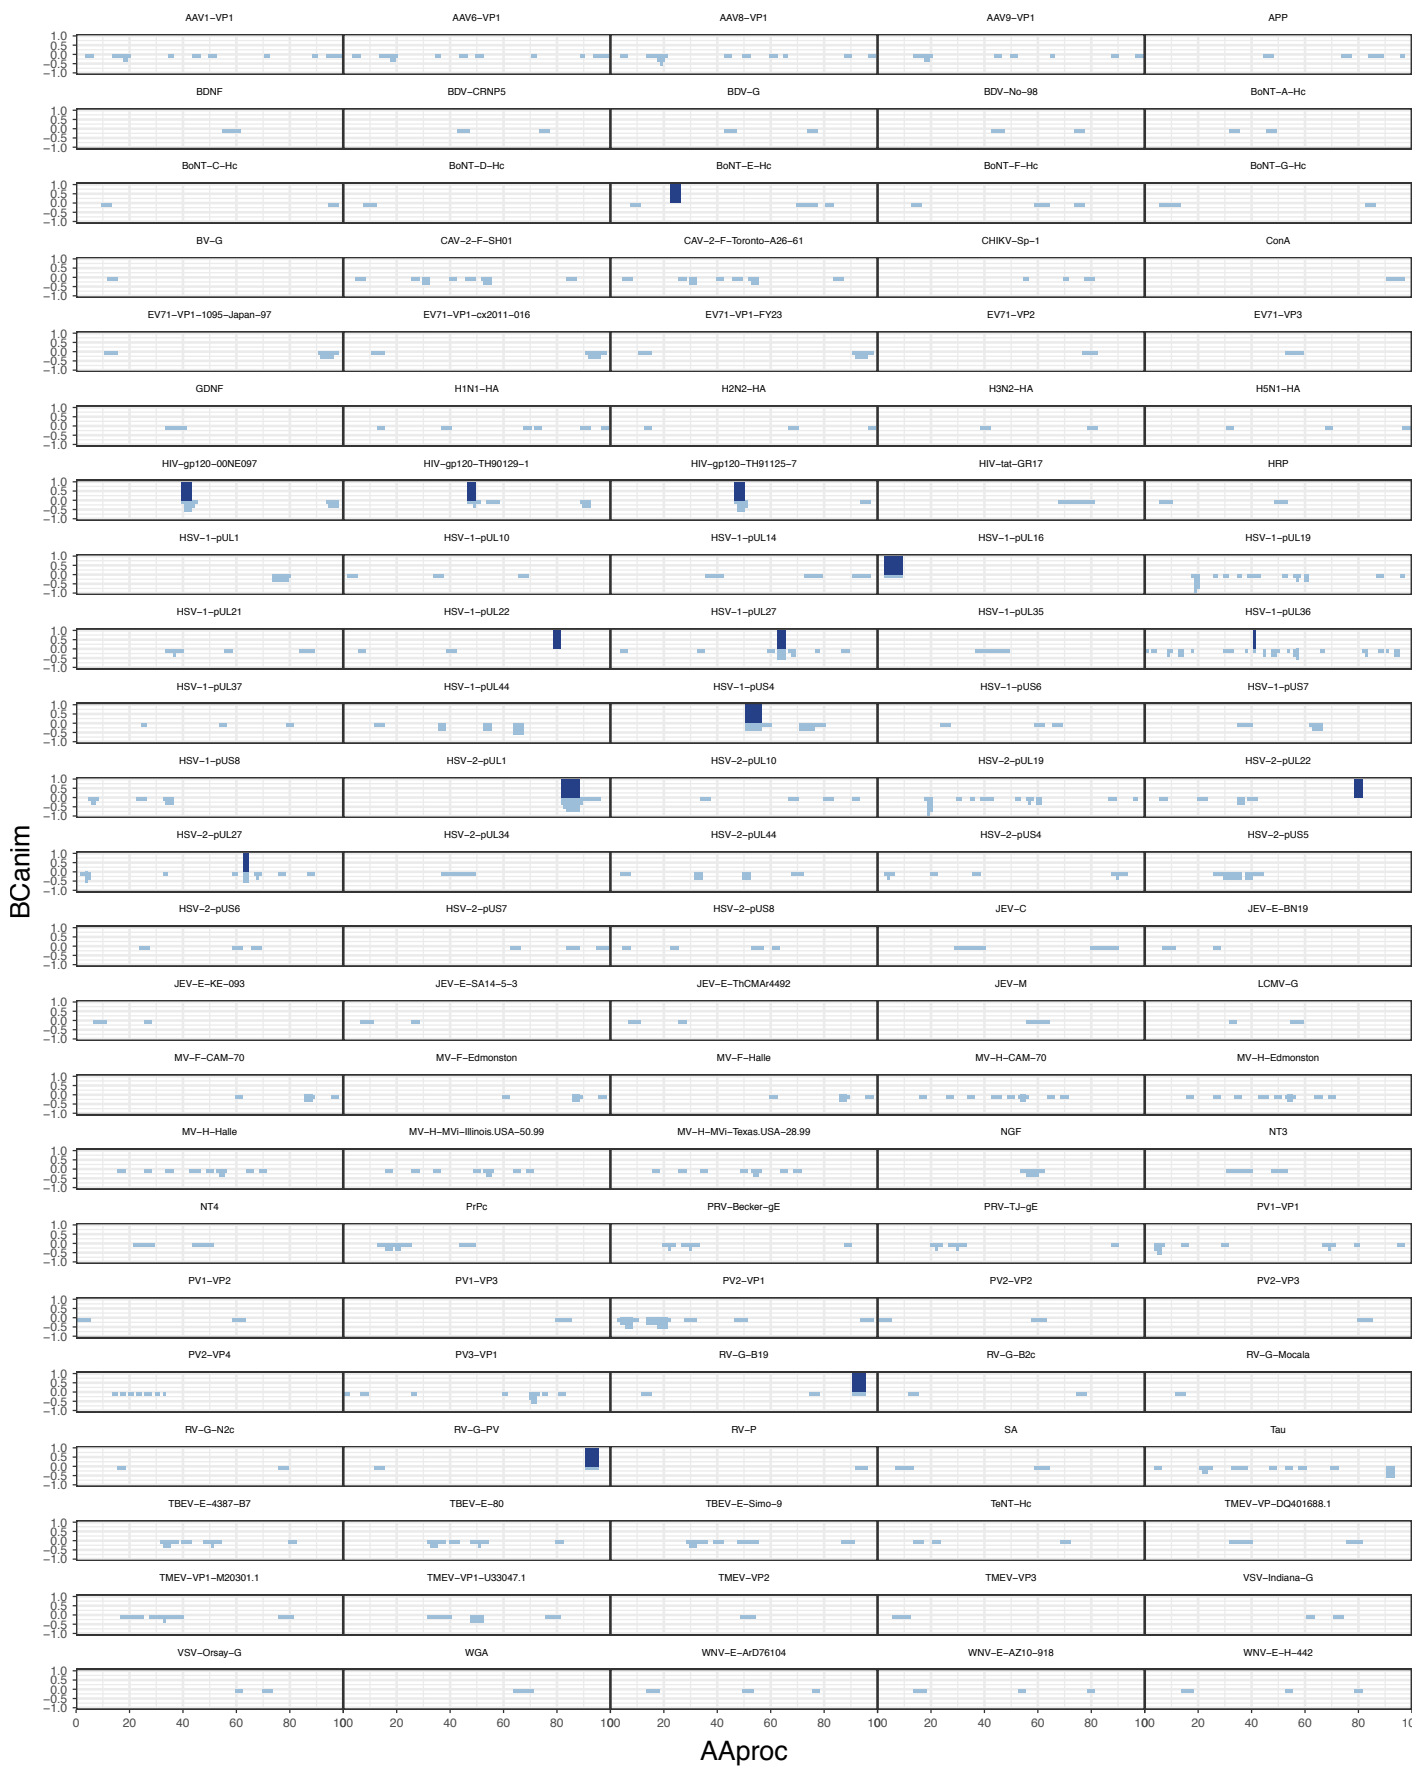

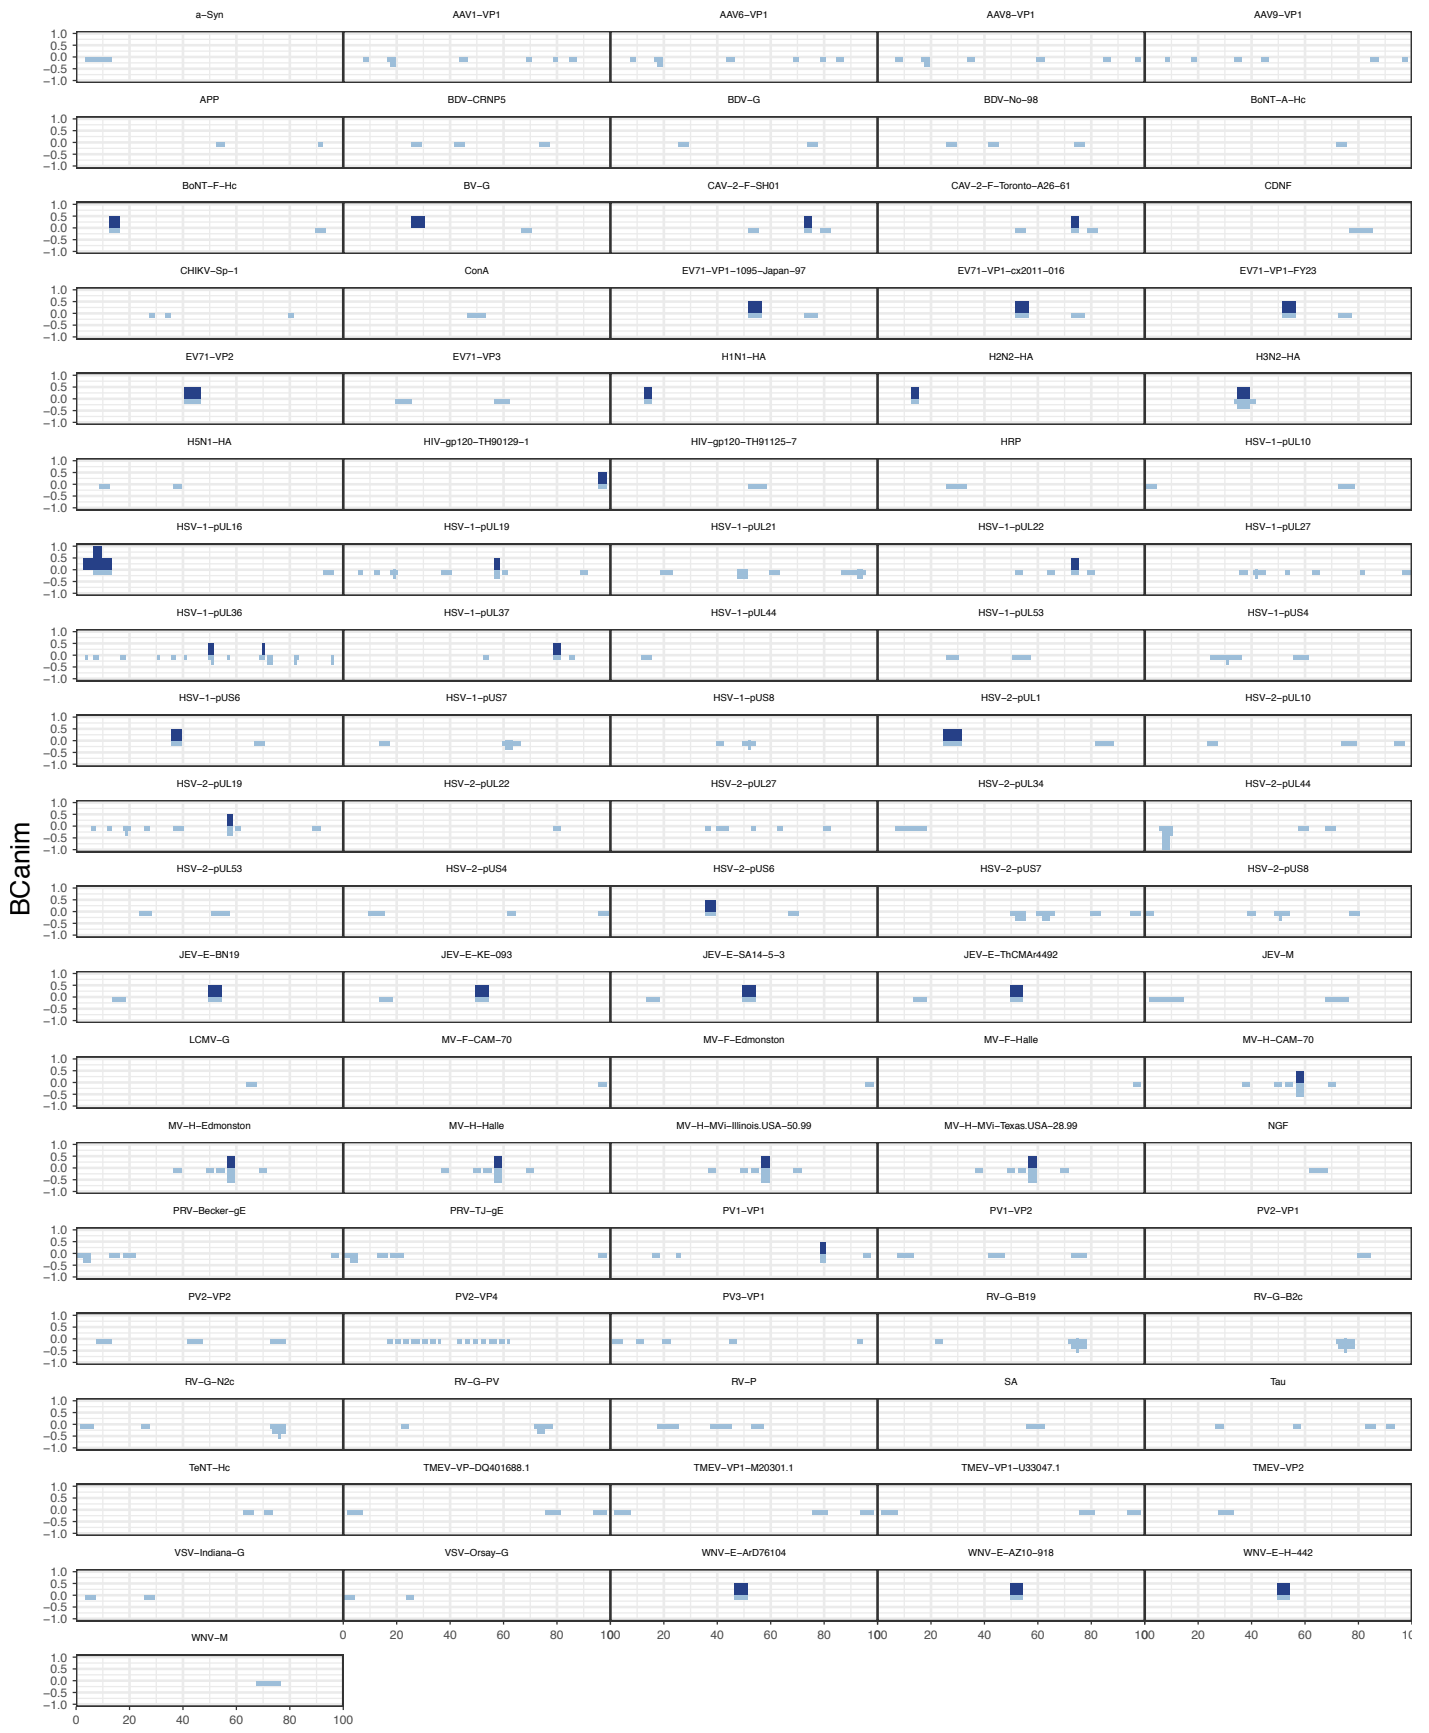

Aaproc

Library ■ mRNA\_30cpc\_HEK293T ■ mRNA\_3cpc\_HEK293T

```
print("Total analysis time:")
```

```
[1] "Total analysis time:"
```

```
print(Sys.time() - strt1)
```

```
Time difference of 2.132019 hours
```

```
devtools::session_info()
```

```
Session info -----
```

```
setting  value
version  R version 3.4.2 (2017-09-28)
system   x86_64, linux-gnu
ui       X11
language (EN)
collate  en_US.UTF-8
tz       UTC
date     2017-11-07
```

```
Packages -----
```

| package          | * version  | date       | source         |
|------------------|------------|------------|----------------|
| acepack          | 1.4.1      | 2016-10-29 | CRAN (R 3.4.2) |
| AnnotationDbi    | 1.38.2     | 2017-10-13 | Bioconductor   |
| AnnotationFilter | 1.0.0      | 2017-10-13 | Bioconductor   |
| AnnotationHub    | 2.8.2      | 2017-10-13 | Bioconductor   |
| backports        | 1.1.1      | 2017-09-25 | CRAN (R 3.4.2) |
| base             | * 3.4.2    | 2017-10-06 | local          |
| base64enc        | 0.1-3      | 2015-07-28 | CRAN (R 3.4.2) |
| Biobase          | * 2.36.2   | 2017-10-13 | Bioconductor   |
| BiocGenerics     | * 0.22.1   | 2017-10-13 | Bioconductor   |
| BiocInstaller    | 1.26.1     | 2017-10-10 | Bioconductor   |
| BiocParallel     | 1.10.1     | 2017-10-13 | Bioconductor   |
| biomaRt          | 2.32.1     | 2017-10-13 | Bioconductor   |
| Biostings        | * 2.44.2   | 2017-10-13 | Bioconductor   |
| biovizBase       | 1.24.0     | 2017-10-13 | Bioconductor   |
| bit              | 1.1-12     | 2014-04-09 | CRAN (R 3.4.2) |
| bit64            | 0.9-7      | 2017-05-08 | CRAN (R 3.4.2) |
| bitops           | 1.0-6      | 2013-08-17 | CRAN (R 3.4.2) |
| blob             | 1.1.0      | 2017-06-17 | CRAN (R 3.4.2) |
| BSeqGenome       | 1.44.2     | 2017-10-13 | Bioconductor   |
| checkmate        | 1.8.4      | 2017-09-25 | CRAN (R 3.4.2) |
| cluster          | 2.0.6      | 2017-03-16 | CRAN (R 3.4.2) |
| codetools        | 0.2-15     | 2016-10-05 | CRAN (R 3.4.2) |
| colorspace       | 1.3-2      | 2016-12-14 | CRAN (R 3.4.2) |
| compiler         | 3.4.2      | 2017-10-06 | local          |
| curl             | 2.8.1      | 2017-07-21 | CRAN (R 3.4.2) |
| data.table       | * 1.10.4-2 | 2017-10-12 | CRAN (R 3.4.2) |
| datasets         | * 3.4.2    | 2017-10-06 | local          |
| DBI              | 0.7        | 2017-06-18 | CRAN (R 3.4.2) |
| DelayedArray     | * 0.2.7    | 2017-10-13 | Bioconductor   |
| devtools         | * 1.13.3   | 2017-08-02 | CRAN (R 3.4.2) |
| dichromat        | 2.0-0      | 2013-01-24 | CRAN (R 3.4.2) |
| digest           | 0.6.12     | 2017-01-27 | CRAN (R 3.4.2) |
| doParallel       | * 1.0.11   | 2017-09-28 | CRAN (R 3.4.2) |
| ensemblDb        | 2.0.4      | 2017-10-13 | Bioconductor   |
| evaluate         | 0.10.1     | 2017-06-24 | CRAN (R 3.4.2) |
| foreach          | * 1.4.3    | 2015-10-13 | CRAN (R 3.4.2) |
| foreign          | 0.8-69     | 2017-06-21 | CRAN (R 3.4.2) |

|                        |          |            |                |
|------------------------|----------|------------|----------------|
| formatR                | 1.5      | 2017-04-25 | CRAN (R 3.4.2) |
| Formula                | 1.2-2    | 2017-07-10 | CRAN (R 3.4.2) |
| GenomeInfoDb           | * 1.12.3 | 2017-10-13 | Bioconductor   |
| GenomeInfoDbData       | 0.99.0   | 2017-10-13 | Bioconductor   |
| GenomicAlignments      | * 1.12.2 | 2017-10-13 | Bioconductor   |
| GenomicFeatures        | 1.28.5   | 2017-10-13 | Bioconductor   |
| GenomicRanges          | * 1.28.6 | 2017-10-13 | Bioconductor   |
| GGally                 | 1.3.2    | 2017-08-02 | CRAN (R 3.4.2) |
| ggbio                  | * 1.24.1 | 2017-10-13 | Bioconductor   |
| ggplot2                | * 2.2.1  | 2016-12-30 | CRAN (R 3.4.2) |
| graph                  | 1.54.0   | 2017-10-13 | Bioconductor   |
| graphics               | * 3.4.2  | 2017-10-06 | local          |
| grDevices              | * 3.4.2  | 2017-10-06 | local          |
| grid                   | * 3.4.2  | 2017-10-06 | local          |
| gridExtra              | 2.3      | 2017-09-09 | CRAN (R 3.4.2) |
| gtable                 | 0.2.0    | 2016-02-26 | CRAN (R 3.4.2) |
| Hmisc                  | 4.0-3    | 2017-05-02 | CRAN (R 3.4.2) |
| hms                    | 0.3      | 2016-11-22 | CRAN (R 3.4.2) |
| htmlTable              | 1.9      | 2017-01-26 | CRAN (R 3.4.2) |
| htmltools              | 0.3.6    | 2017-04-28 | CRAN (R 3.4.2) |
| htmlwidgets            | 0.9      | 2017-07-10 | CRAN (R 3.4.2) |
| httpuv                 | 1.3.5    | 2017-07-04 | CRAN (R 3.4.2) |
| httr                   | 1.3.1    | 2017-08-20 | CRAN (R 3.4.2) |
| interactiveDisplayBase | 1.14.0   | 2017-10-13 | Bioconductor   |
| IRanges                | * 2.10.5 | 2017-10-13 | Bioconductor   |
| iterators              | * 1.0.8  | 2015-10-13 | CRAN (R 3.4.2) |
| kableExtra             | * 0.5.2  | 2017-09-15 | CRAN (R 3.4.2) |
| knitr                  | * 1.17   | 2017-08-10 | CRAN (R 3.4.2) |
| labeling               | 0.3      | 2014-08-23 | CRAN (R 3.4.2) |
| lattice                | 0.20-35  | 2017-03-25 | CRAN (R 3.4.2) |
| latticeExtra           | 0.6-28   | 2016-02-09 | CRAN (R 3.4.2) |
| lazyeval               | 0.2.0    | 2016-06-12 | CRAN (R 3.4.2) |
| magrittr               | 1.5      | 2014-11-22 | CRAN (R 3.4.2) |
| Matrix                 | 1.2-11   | 2017-08-16 | CRAN (R 3.4.2) |
| matrixStats            | * 0.52.2 | 2017-04-14 | CRAN (R 3.4.2) |
| memoise                | 1.1.0    | 2017-04-21 | CRAN (R 3.4.2) |
| methods                | * 3.4.2  | 2017-10-06 | local          |
| mime                   | 0.5      | 2016-07-07 | CRAN (R 3.4.2) |
| munsell                | 0.4.3    | 2016-02-13 | CRAN (R 3.4.2) |
| nnet                   | 7.3-12   | 2016-02-02 | CRAN (R 3.4.2) |
| OrganismDbi            | 1.18.1   | 2017-10-13 | Bioconductor   |
| parallel               | * 3.4.2  | 2017-10-06 | local          |
| plyr                   | * 1.8.4  | 2016-06-08 | CRAN (R 3.4.2) |
| ProtGenerics           | 1.8.0    | 2017-10-13 | Bioconductor   |
| R6                     | 2.2.2    | 2017-06-17 | CRAN (R 3.4.2) |
| RBGL                   | 1.52.0   | 2017-10-13 | Bioconductor   |
| RColorBrewer           | 1.1-2    | 2014-12-07 | CRAN (R 3.4.2) |
| Rcpp                   | 0.12.13  | 2017-09-28 | CRAN (R 3.4.2) |
| RCurl                  | 1.95-4.8 | 2016-03-01 | CRAN (R 3.4.2) |
| readr                  | 1.1.1    | 2017-05-16 | CRAN (R 3.4.2) |
| reshape                | 0.8.7    | 2017-08-06 | CRAN (R 3.4.2) |
| reshape2               | 1.4.2    | 2016-10-22 | CRAN (R 3.4.2) |
| rlang                  | 0.1.2    | 2017-08-09 | CRAN (R 3.4.2) |
| rmarkdown              | 1.6      | 2017-06-15 | CRAN (R 3.4.2) |
| rpart                  | 4.1-11   | 2017-04-21 | CRAN (R 3.4.2) |
| rprojroot              | 1.2      | 2017-01-16 | CRAN (R 3.4.2) |
| Rsamtools              | * 1.28.0 | 2017-10-13 | Bioconductor   |
| RSQLite                | 2.0      | 2017-06-19 | CRAN (R 3.4.2) |
| rtracklayer            | 1.36.6   | 2017-10-13 | Bioconductor   |

|                      |          |            |                |
|----------------------|----------|------------|----------------|
| rvest                | 0.3.2    | 2016-06-17 | CRAN (R 3.4.2) |
| S4Vectors            | * 0.14.7 | 2017-10-13 | Bioconductor   |
| scales               | 0.5.0    | 2017-08-24 | CRAN (R 3.4.2) |
| shiny                | 1.0.5    | 2017-08-23 | CRAN (R 3.4.2) |
| splines              | 3.4.2    | 2017-10-06 | local          |
| stats                | * 3.4.2  | 2017-10-06 | local          |
| stats4               | * 3.4.2  | 2017-10-06 | local          |
| stringi              | 1.1.5    | 2017-04-07 | CRAN (R 3.4.2) |
| stringr              | 1.2.0    | 2017-02-18 | CRAN (R 3.4.2) |
| SummarizedExperiment | * 1.6.5  | 2017-10-13 | Bioconductor   |
| survival             | 2.41-3   | 2017-04-04 | CRAN (R 3.4.2) |
| tibble               | 1.3.4    | 2017-08-22 | CRAN (R 3.4.2) |
| tools                | 3.4.2    | 2017-10-06 | local          |
| utils                | * 3.4.2  | 2017-10-06 | local          |
| VariantAnnotation    | 1.22.3   | 2017-10-13 | Bioconductor   |
| withr                | 2.0.0    | 2017-07-28 | CRAN (R 3.4.2) |
| XML                  | 3.98-1.9 | 2017-06-19 | CRAN (R 3.4.2) |
| xml2                 | 1.1.1    | 2017-01-24 | CRAN (R 3.4.2) |
| xtable               | 1.8-2    | 2016-02-05 | CRAN (R 3.4.2) |
| XVector              | * 0.16.0 | 2017-10-13 | Bioconductor   |
| yaml                 | 2.1.14   | 2016-11-12 | CRAN (R 3.4.2) |
| zlibbioc             | 1.22.0   | 2017-10-13 | Bioconductor   |



# Heatmap analysis output

*Tomas Bjorklund*

*Wed Sep 27 16:23:32 2017*

MNM021

A secondary approach to visualizing the top candidates and their relative abundance.

```
suppressPackageStartupMessages(library(knitr))
```

```
opts_chunk$set(fig.width = 8, fig.height = 10.2)
```

## Selection of relevant samples

```
select.samples <- readRDS("data/allSamplesDataTable.RDS")
select.samples$Group[select.samples$Group=="mRNA_3cpc_HEK293T"] <- "mRNA_3cpc_HEK293T"
select.samples$Group[select.samples$Group=="mRNA_30cpc_HEK293T"] <- "mRNA_30cpc_HEK293T"
select.samples <- select.samples[-grep("4wks|mRNA_3cpc_pNeuron_RNA",select.samples$Group),]
```

```
select.samples.binCat <- data.table::copy(select.samples)
setkeyv(select.samples.binCat,c("Group","Category"))
```

\*MNM004

```
select.samples.binCat <- select.samples.binCat[,list(BCcount=length(table(strsplit(paste(t(BC),
collapse=","), ","))), NormCount=mean(log2(RNAcount+1))
), by=key(select.samples.binCat)]
```

```
setkey(select.samples.binCat,Group)
ref.table <- select.samples.binCat["DNA_pscAAVlib"]
ref.table[,c("Group","NormCount"):=NULL]
setnames(ref.table,"BCcount","libBC")
setkey(ref.table,"Category")
select.samples.binCat[,totBC:=sum(BCcount), by="Group"]
max.count <- max(select.samples.binCat$totBC)
select.samples.binCat[,BCcountN:=BCcount/totBC*max.count]
length.Table <- unique(select.samples, by=c("Category","GeneName"))
length.Table <- length.Table[,list(seqlength=sum(seqlength)), by="Category"]
setkey(length.Table,"Category")
setkey(select.samples.binCat,"Category")
select.samples.binCat <- select.samples.binCat[length.Table,nomatch=0]
select.samples.binCat <- select.samples.binCat[ref.table,nomatch=0]
```

```
select.samples.binCat[,Category:=gsub("/|_|'", "-",Category)]
select.samples.binCat[,BCcountNseq:=BCcountN/seqlength]
select.samples.binCat[,refNormBC:=BCcountN/libBC]
```

```
select.samples.binGene <- data.table::copy(select.samples)
setkeyv(select.samples.binGene,c("Group","Category","GeneName","seqlength"))
select.samples.binGene <- select.samples.binGene[,list(BCcount=length(table(strsplit(paste(t(BC),
collapse=","), ",")), NormCount=mean(log2(RNAcount+1))), by=key(select.sampl

select.samples.binGene[,GeneName:=gsub("/|_|'", "-",GeneName)]
setkey(select.samples.binGene,Group)
ref.table <- select.samples.binGene["DNA_pscAAVlib"]
ref.table[,c("Group","Category","NormCount","seqlength"):=NULL]
setnames(ref.table,"BCcount","libBC")
```

```

setkey(ref.table, "GeneName")
setkey(select.samples.binGene, "GeneName")
select.samples.binGene[, totBC:=sum(BCcount), by="Group"]
select.samples.binGene <- select.samples.binGene[ref.table, nomatch=0]
max.count <- max(select.samples.binGene$totBC)
select.samples.binGene[, BCcountN:=BCcount/totBC*max.count]
select.samples.binGene[, BCcountNseq:=BCcountN/seqlength]
select.samples.binGene[, refNormBC:=BCcountN/libBC]

select.samples.binPos <- data.table::copy(select.samples)
setkeyv(select.samples.binPos, c("Group", "structure", "Sequence"))
select.samples.binPos <- unique(select.samples.binPos, by=c("Group", "structure", "Sequence"))
#Due to key, this removes replicates if identical sequence mapped to multiple genes

setkeyv(select.samples.binPos, c("Group", "GeneName", "AA", "seqlength"))
select.samples.binPos <- select.samples.binPos[, list(BCcount=length(table(strsplit(paste(t(BC), collapse=","),
NormCount=mean(log2(RNAcount+1)),
AnimalCount=length(table(strsplit(paste(t(Animals), collapse=","),
LUTnrs=paste(unique(names(table(strsplit(paste(t(LUTnrs), collapse=","),
mainStruct=paste(unique(structure), collapse=","),
mismatches=median(mismatches)), by=key(select.samples.binPos[, c("Group", "GeneName", "AA", "seqlength"))

setkey(select.samples.binPos, Group)
ref.table <- select.samples.binPos["DNA_pscAAVlib"]
ref.table[, c("Group", "NormCount", "AnimalCount", "LUTnrs", "mainStruct", "mismatches", "seqlength"):=NULL]
setnames(ref.table, "BCcount", "libBC")
setkeyv(ref.table, c("GeneName", "AA"))
setkeyv(select.samples.binPos, c("GeneName", "AA"))
select.samples.binPos <- select.samples.binPos[ref.table, nomatch=0]
select.samples.binPos[, totBC:=sum(BCcount), by="Group"]
max.count <- max(select.samples.binPos$totBC)
select.samples.binPos[, BCcountN:=BCcount/totBC*max.count]
select.samples.binPos[, libNormBC:=BCcountN/libBC]
select.samples.binPos[, BCcountNanim:=BCcountN+AnimalCount]
select.samples.binPos[, BCcountanim:=BCcount+AnimalCount]
select.samples.binPos[, BCcountNseq:=BCcountN/seqlength]
select.samples.binPos[, NormCountBC:=BCcountNseq*NormCount]

select.samples.binPos[, GeneAA:=paste(GeneName, " [" , AA, "]" - ", mainStruct, sep="")]

```

## Plot Heatmaps split by Category

```

plotCategory <- function(select.samples.table, plot.col, sample.select){
  setkey(select.samples.table, Group)
  select.samples.select <- select.samples.table[sample.select]
  eval(parse(text=paste("setorder(select.samples.select, Group, ~", plot.col, ")", sep="")))
  select.samples.matrix <- acast(select.samples.select, Category~Group, value.var=plot.col)
  #Utilizes reshape 2 to make matrix for heatmap

  select.samples.matrix[is.na(select.samples.matrix)] <- 0
  select.samples.matrix <- select.samples.matrix[, sample.select]
  return(heatmap(select.samples.matrix, cluster_rows=TRUE, show_rownames=TRUE, cluster_cols=FALSE))
}

plotCategory(select.samples.binCat, "BCcountNseq", c("DNA_pscAAVlib", "mRNA_30cpc_Str", "mRNA_30cpc_Th", "mRNA_30cpc_Th"))

```

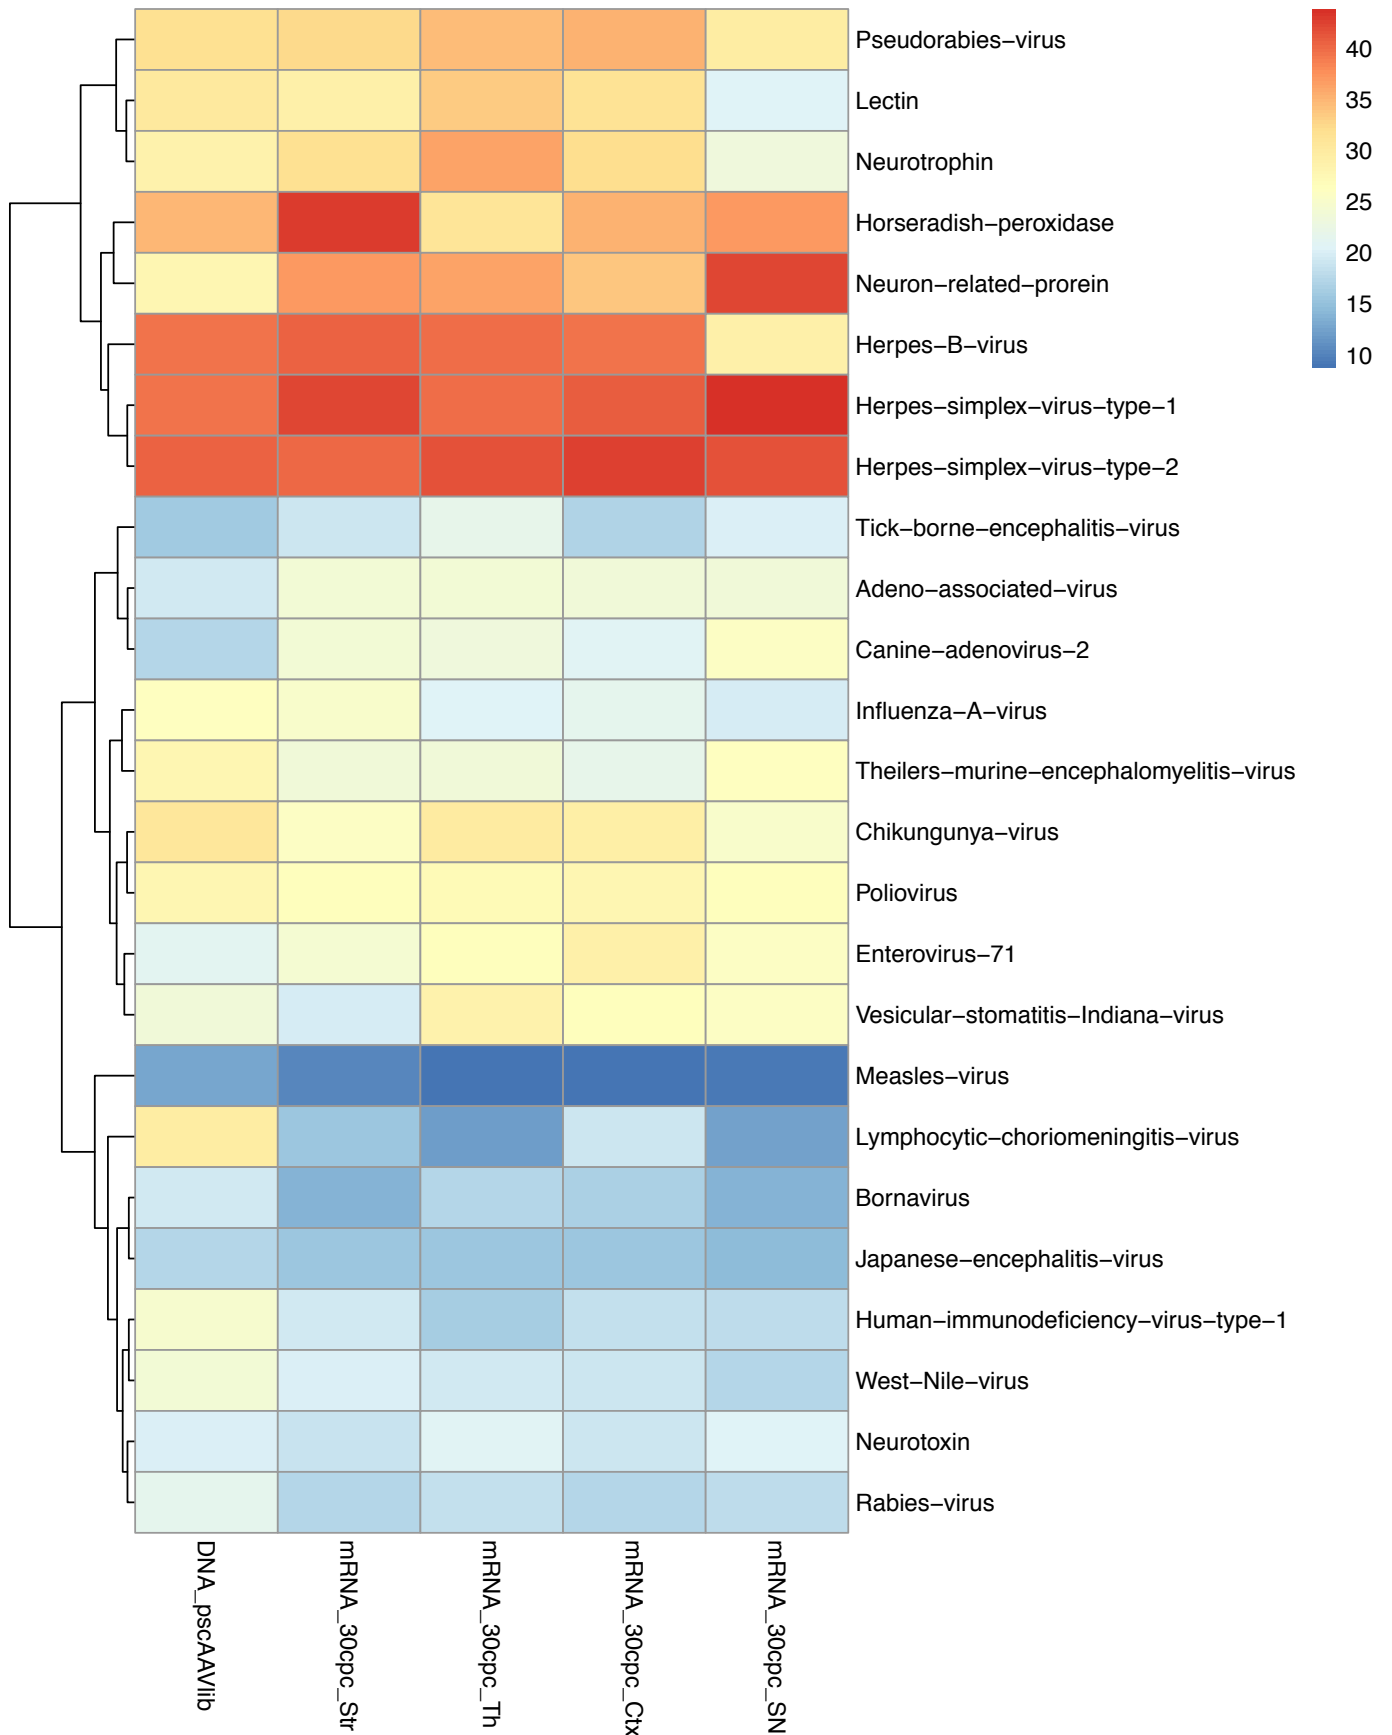

```
plotCategory(select.samples.binCat,"BCcountNseq",c("mRNA_3cpc_Str","mRNA_3cpc_Th","mRNA_3cpc_Ctx","mRNA_3cpc_SN"))
```

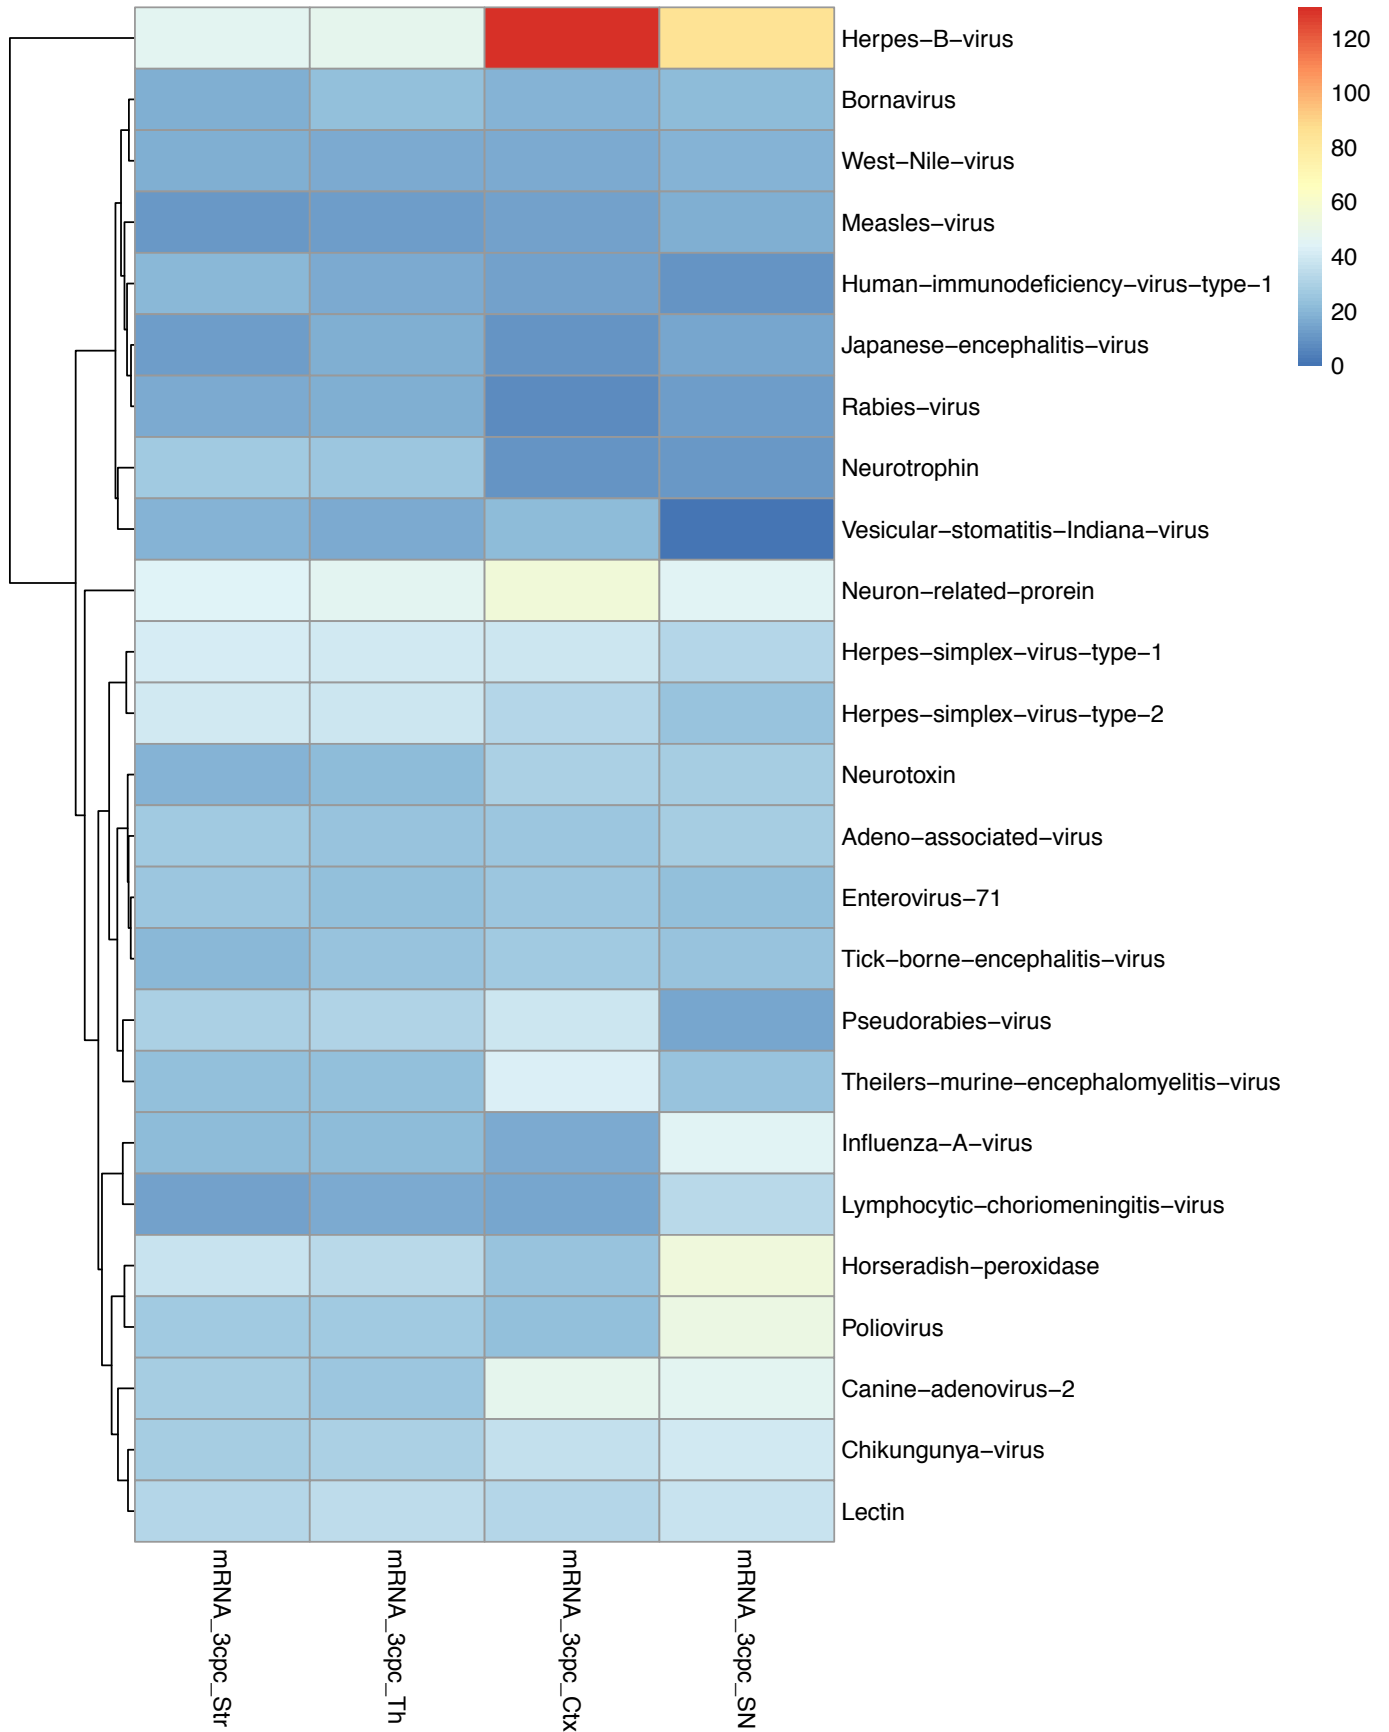

```
plotCategory(select.samples.binCat, "BCcountNseq", c("mRNA_30cpc_pNeuron", "mRNA_3cpc_pNeuron", "mRNA_30cpc_HEK293T", "mRNA_3cpc_HEK293T"))
```

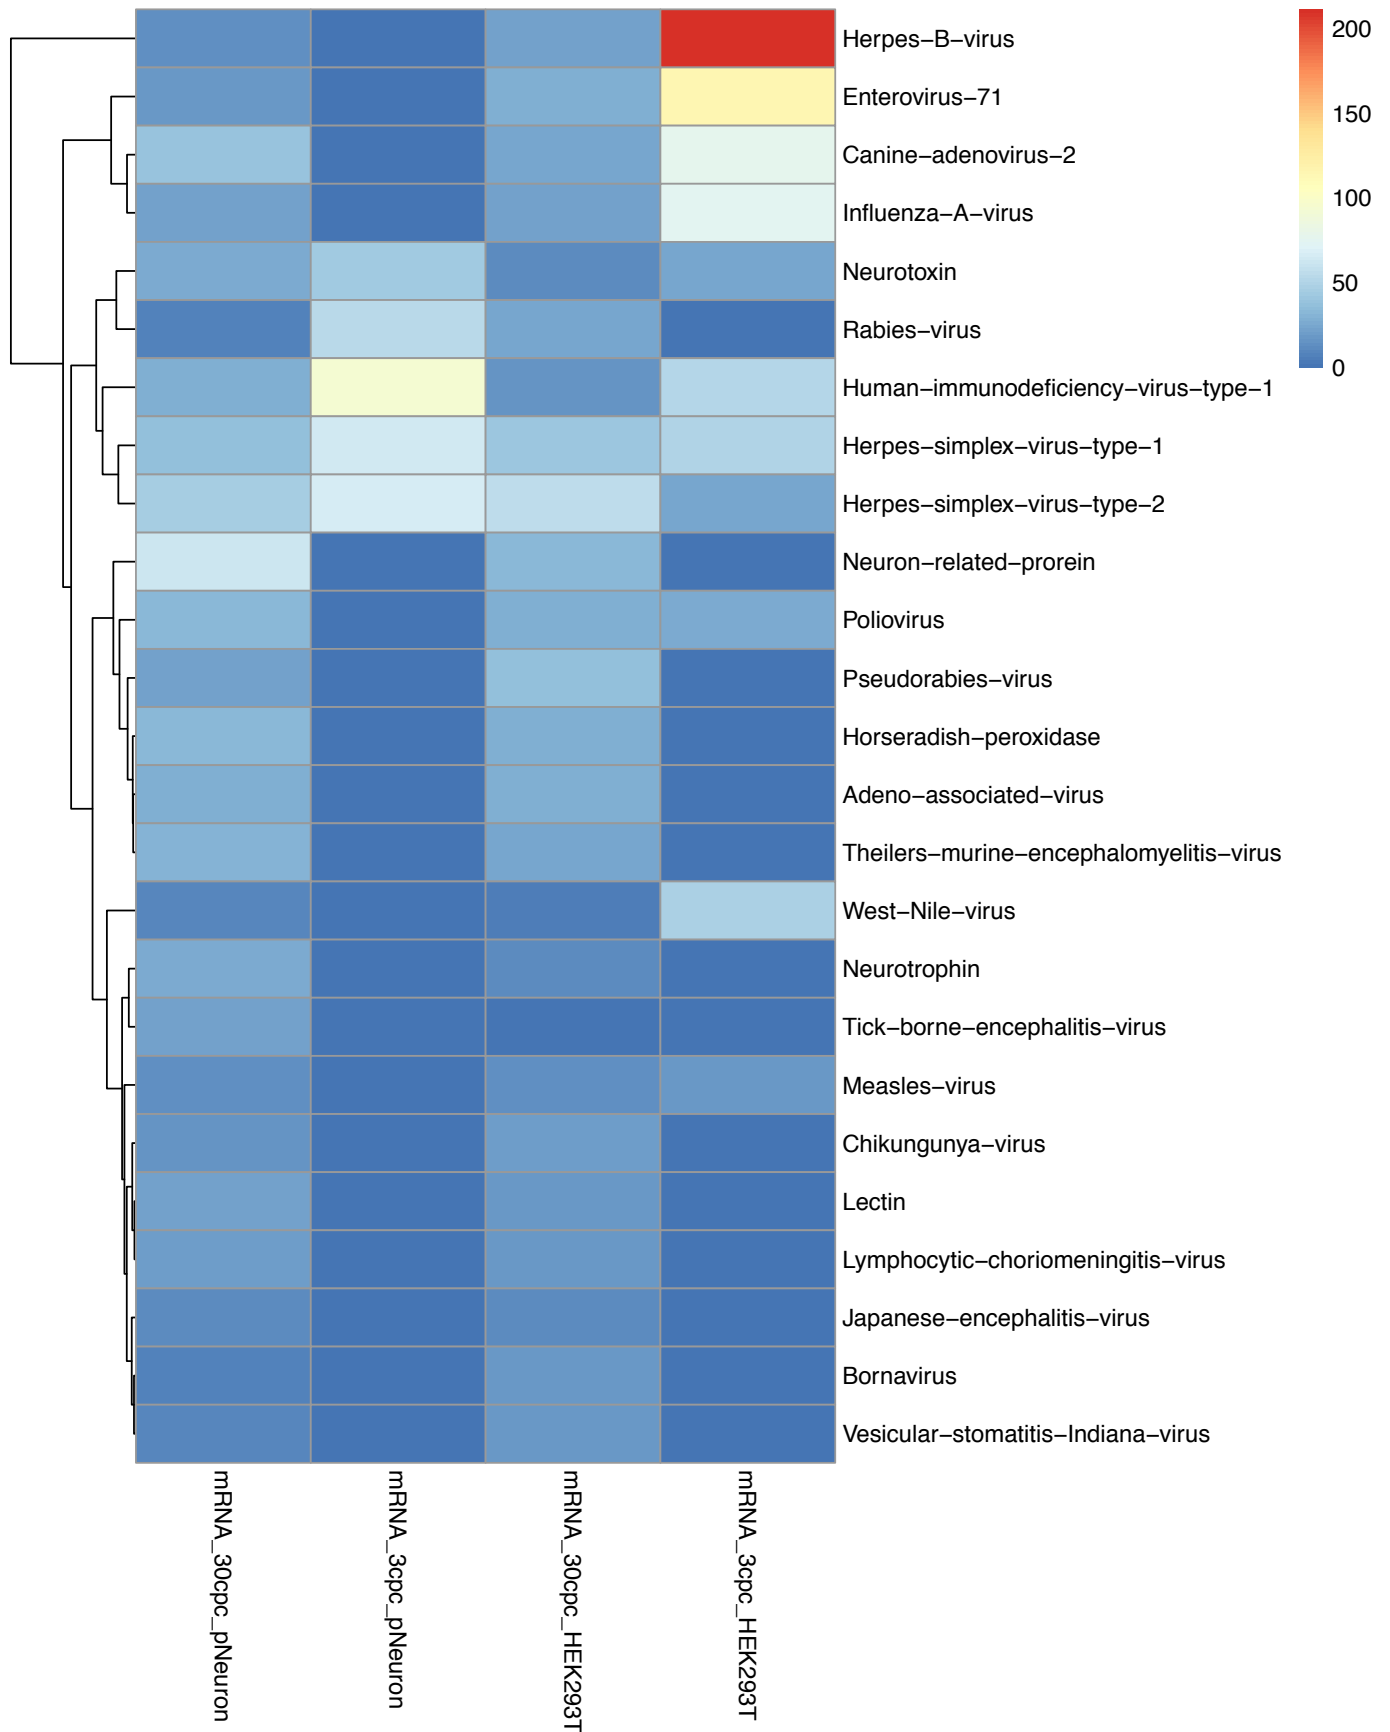

```
plotCategory(select.samples.binCat,"refNormBC",c("mRNA_30cpc_Str","mRNA_3cpc_Str","mRNA_30cpc_Th","mRNA_3cpc_Th","mRNA_30cpc_Ctx","mRNA_3cpc_Ctx","mRNA_30cpc_SN","mRNA_3cpc_SN"))
```

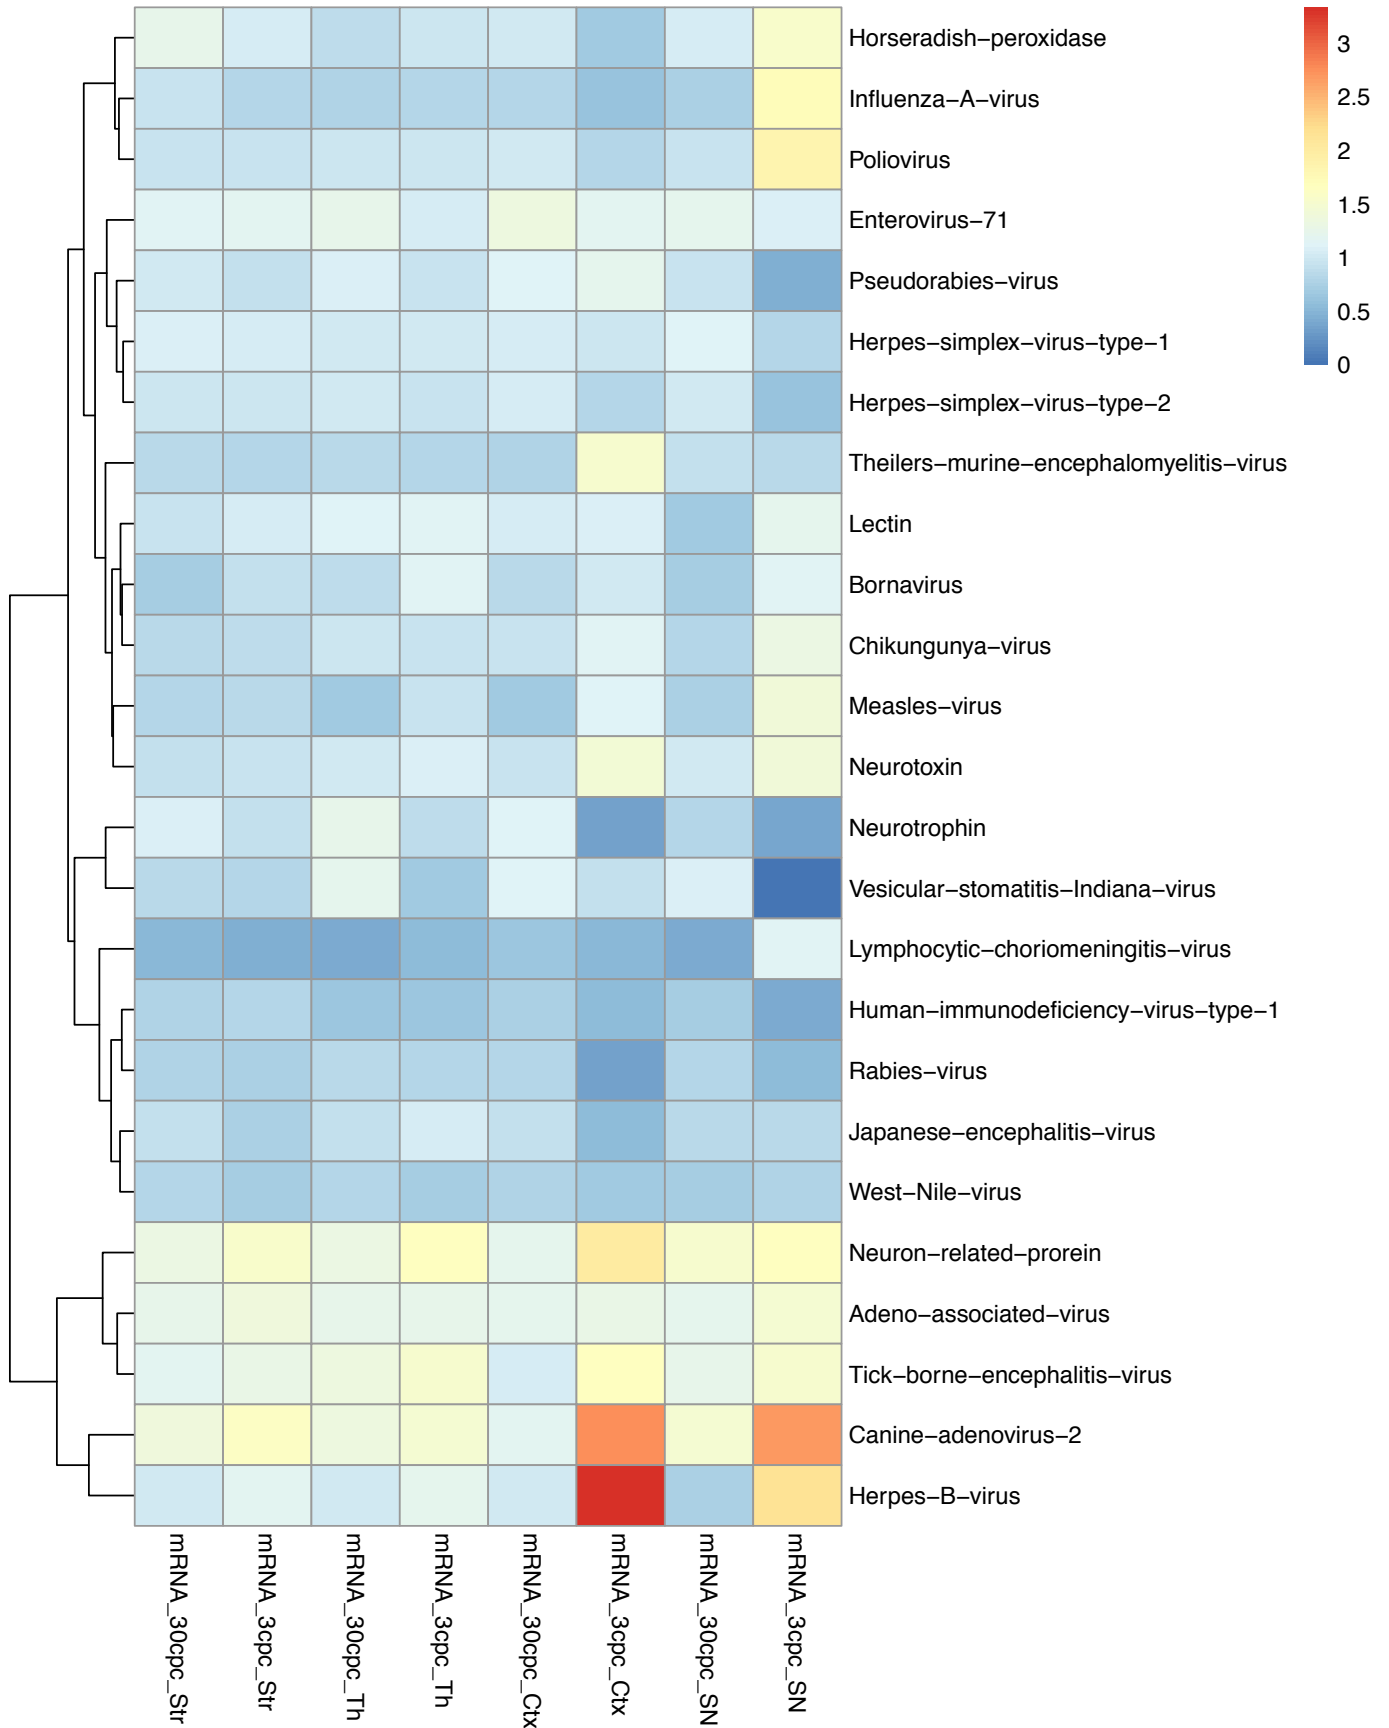

```
plotCategory(select.samples.binCat,"refNormBC",c("mRNA_30cpc_pNeuron","mRNA_3cpc_pNeuron","mRNA_30cpc_HEK293T","mRNA_3cpc_HEK293T"))
```

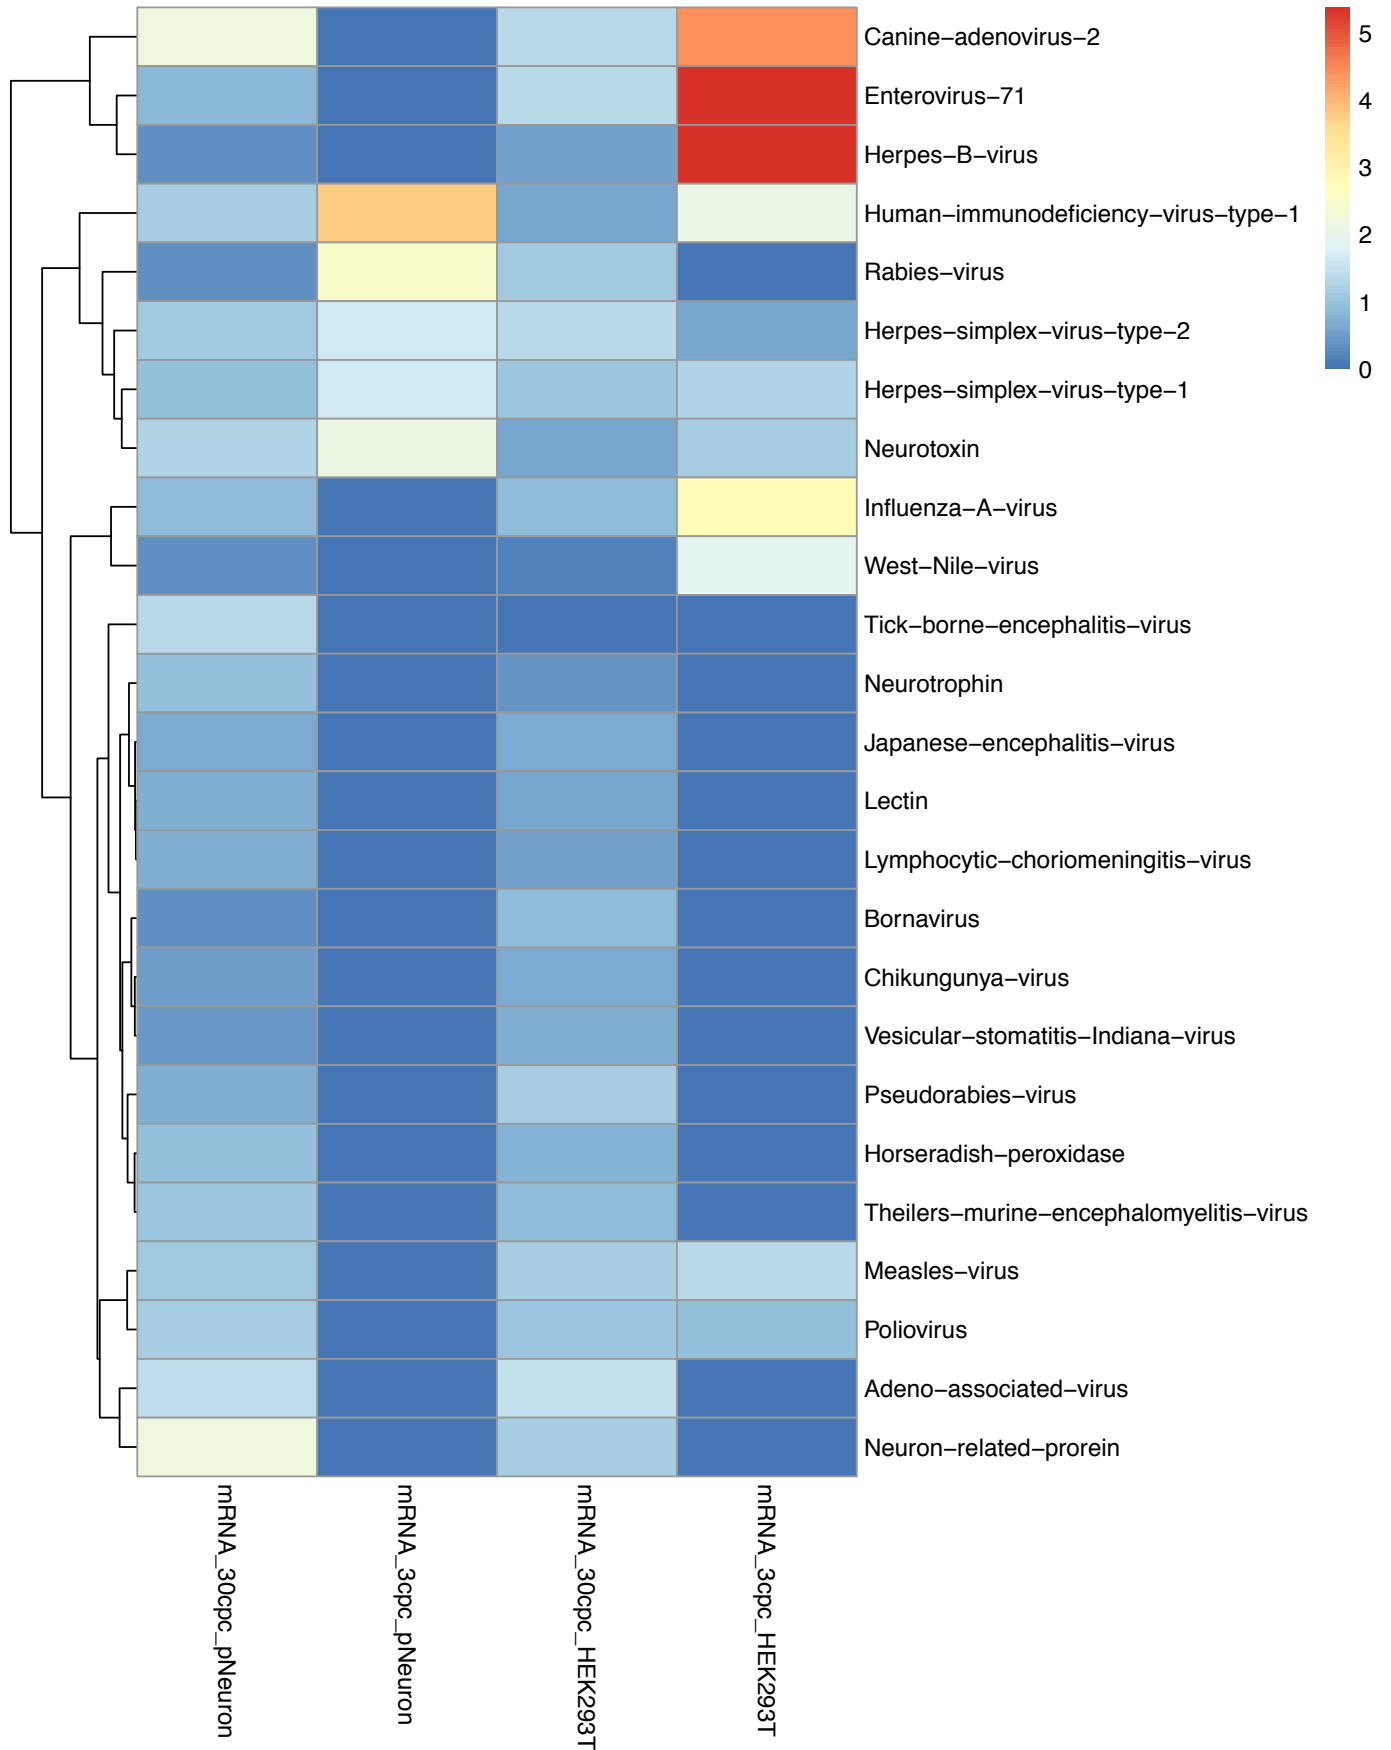

## Plot Heatmaps split by GeneName

```
plotGene <- function(select.samples.table,plot.col,sample.select){
  setkey(select.samples.table,Group)
  select.samples.select <- select.samples.table[sample.select]
  eval(parse(text=paste("setorder(select.samples.select,Group, -", plot.col,")", sep="")))
  select.samples.matrix <- acast(select.samples.select, GeneName~Group, value.var=plot.col)
  #Utilizes reshape 2 to make matrix for heatmap

  select.samples.matrix[is.na(select.samples.matrix)] <- 0
  select.samples.matrix <- select.samples.matrix[,sample.select]
  return(pheatmap(select.samples.matrix, fontsize_row=5.8, cluster_rows=TRUE, show_rownames=TRUE, cluster_col=TRUE))
}

plotGene(select.samples.binGene,"BCcountNseq",c("DNA_pscAAVlib","mRNA_30cpc_Str","mRNA_30cpc_Th","mRNA_30cpc_Th"))
```



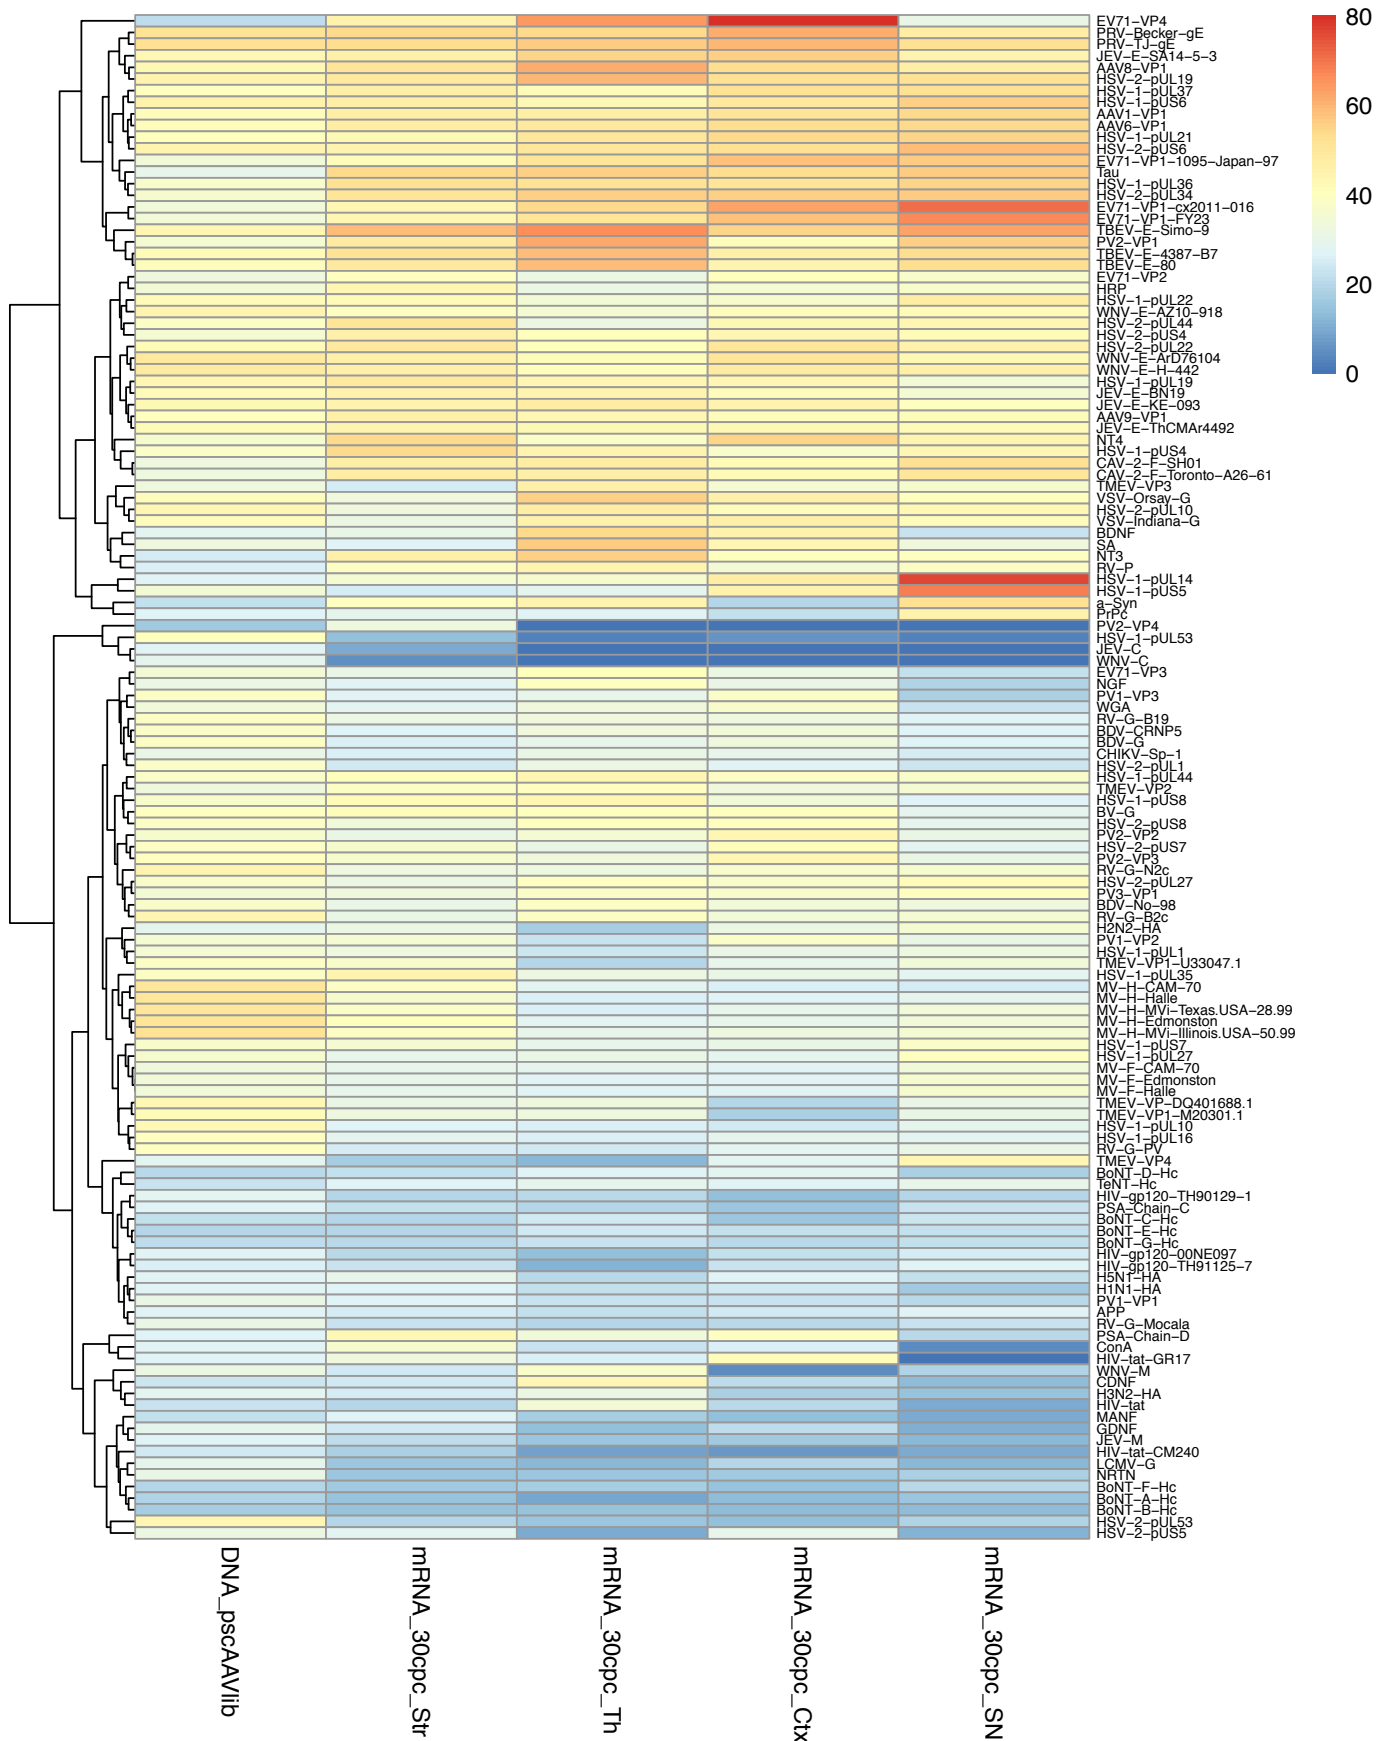

```
plotGene(select.samples.binGene,"BCcountNseq",c("mRNA_3cpc_Str","mRNA_3cpc_Th","mRNA_3cpc_Ctx","mRNA_3cpc_SN"))
```

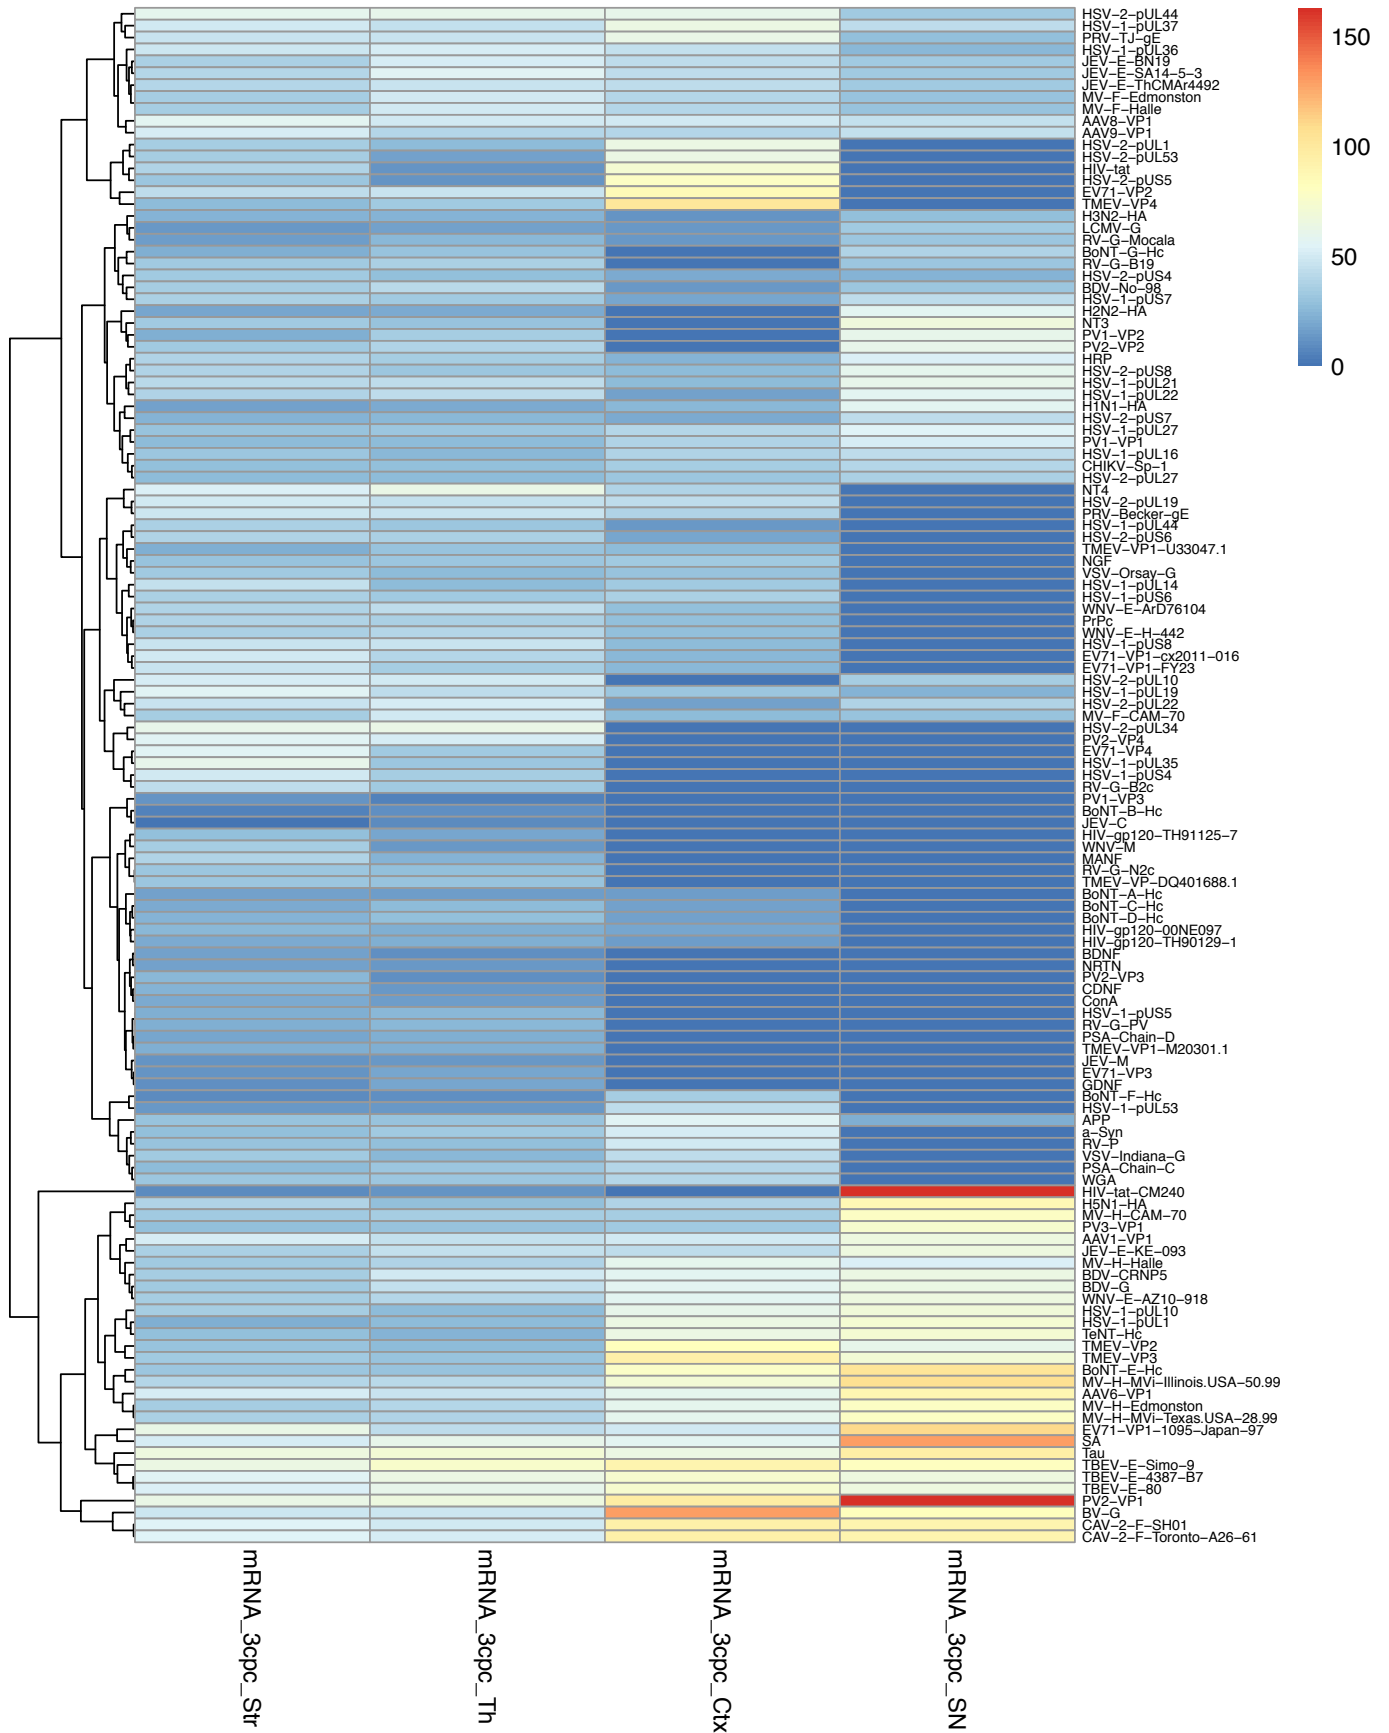

```
plotGene(select.samples.binGene, "BCcountNseq", c("mRNA_30cpc_pNeuron", "mRNA_3cpc_pNeuron", "mRNA_30cpc_HEK293T"))
```

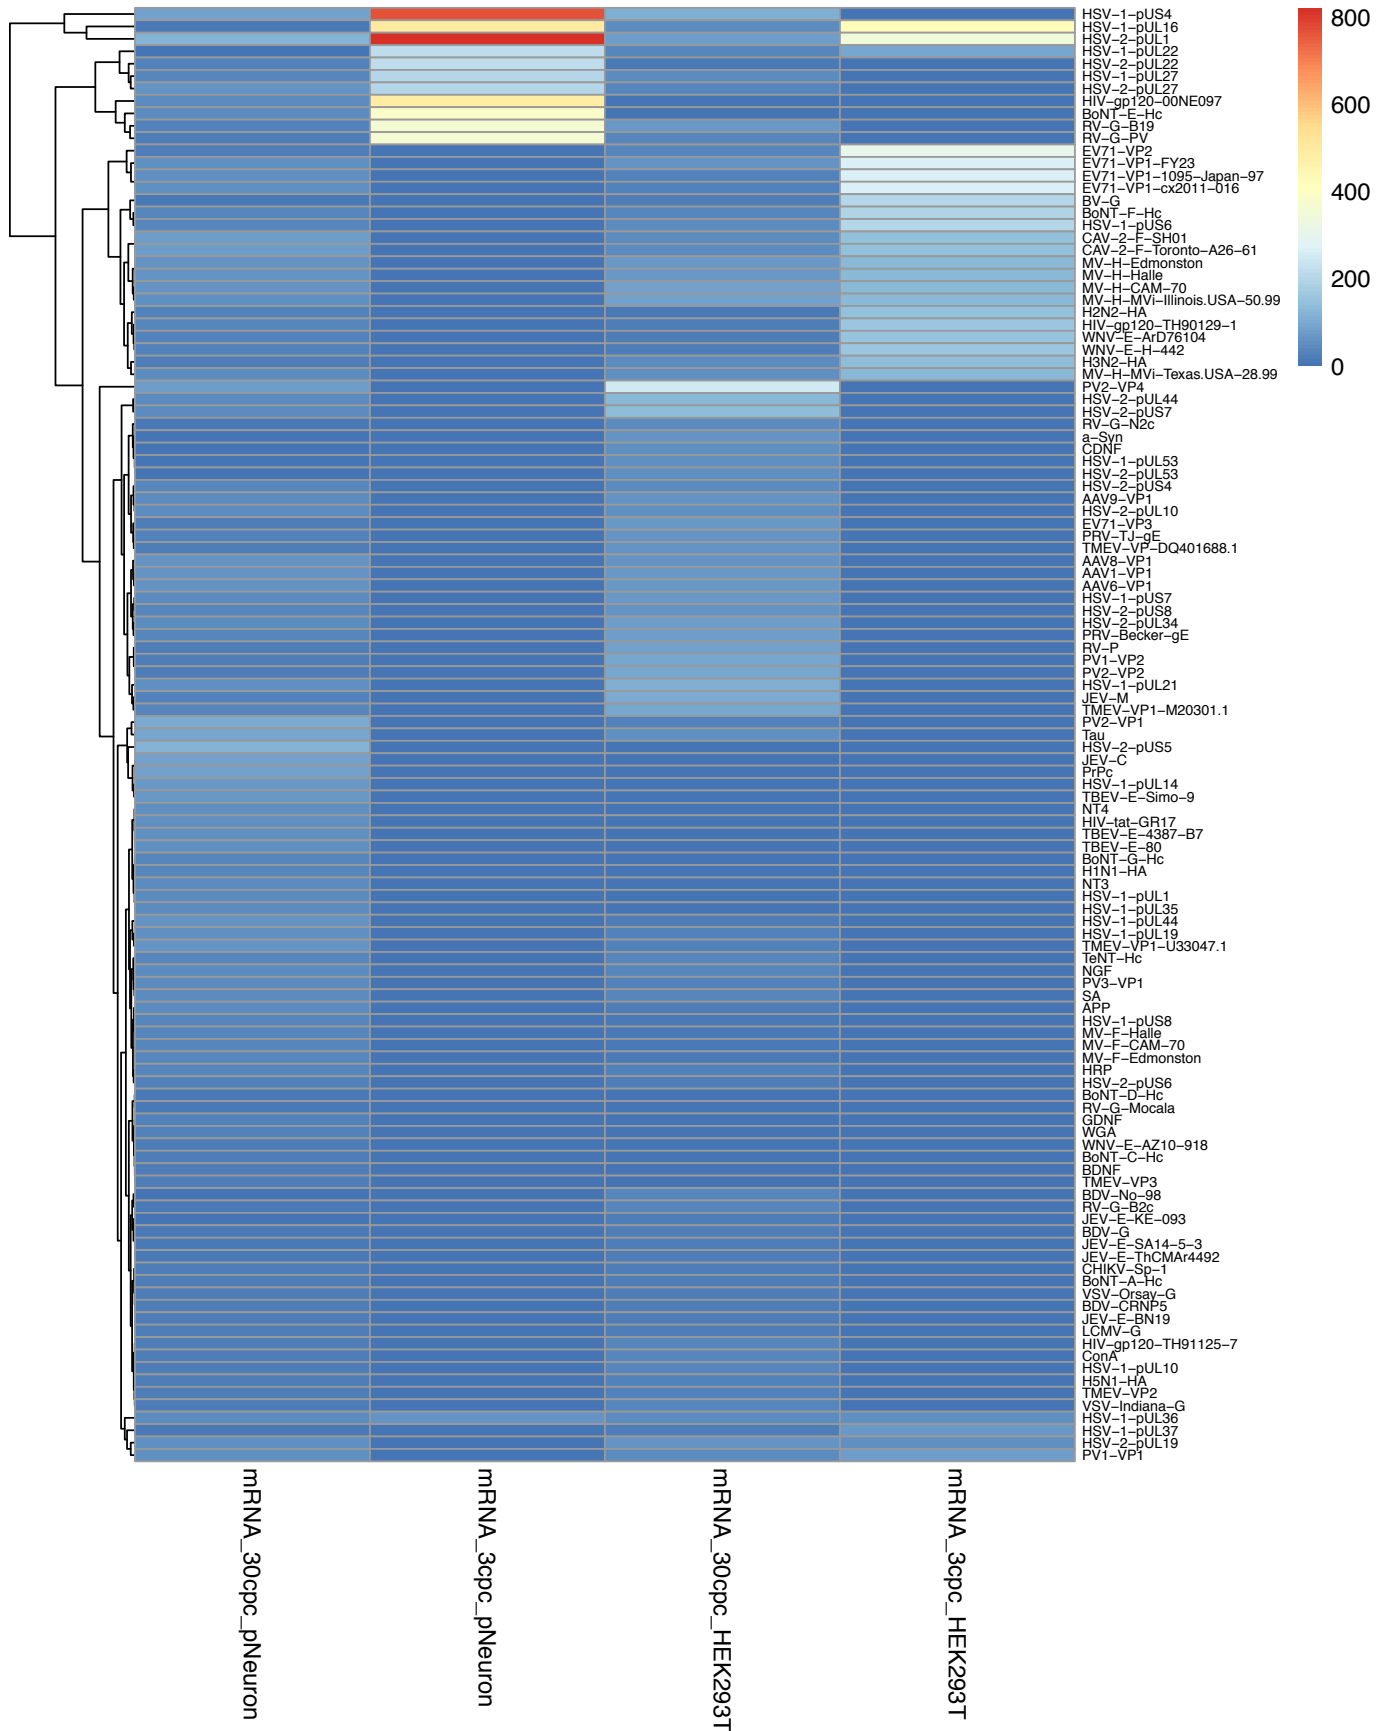

```
plotGene(select.samples.binGene,"refNormBC",c("mRNA_30cpc_Str","mRNA_30cpc_Th","mRNA_30cpc_Ctx","mRNA_30cpc_..."))
```

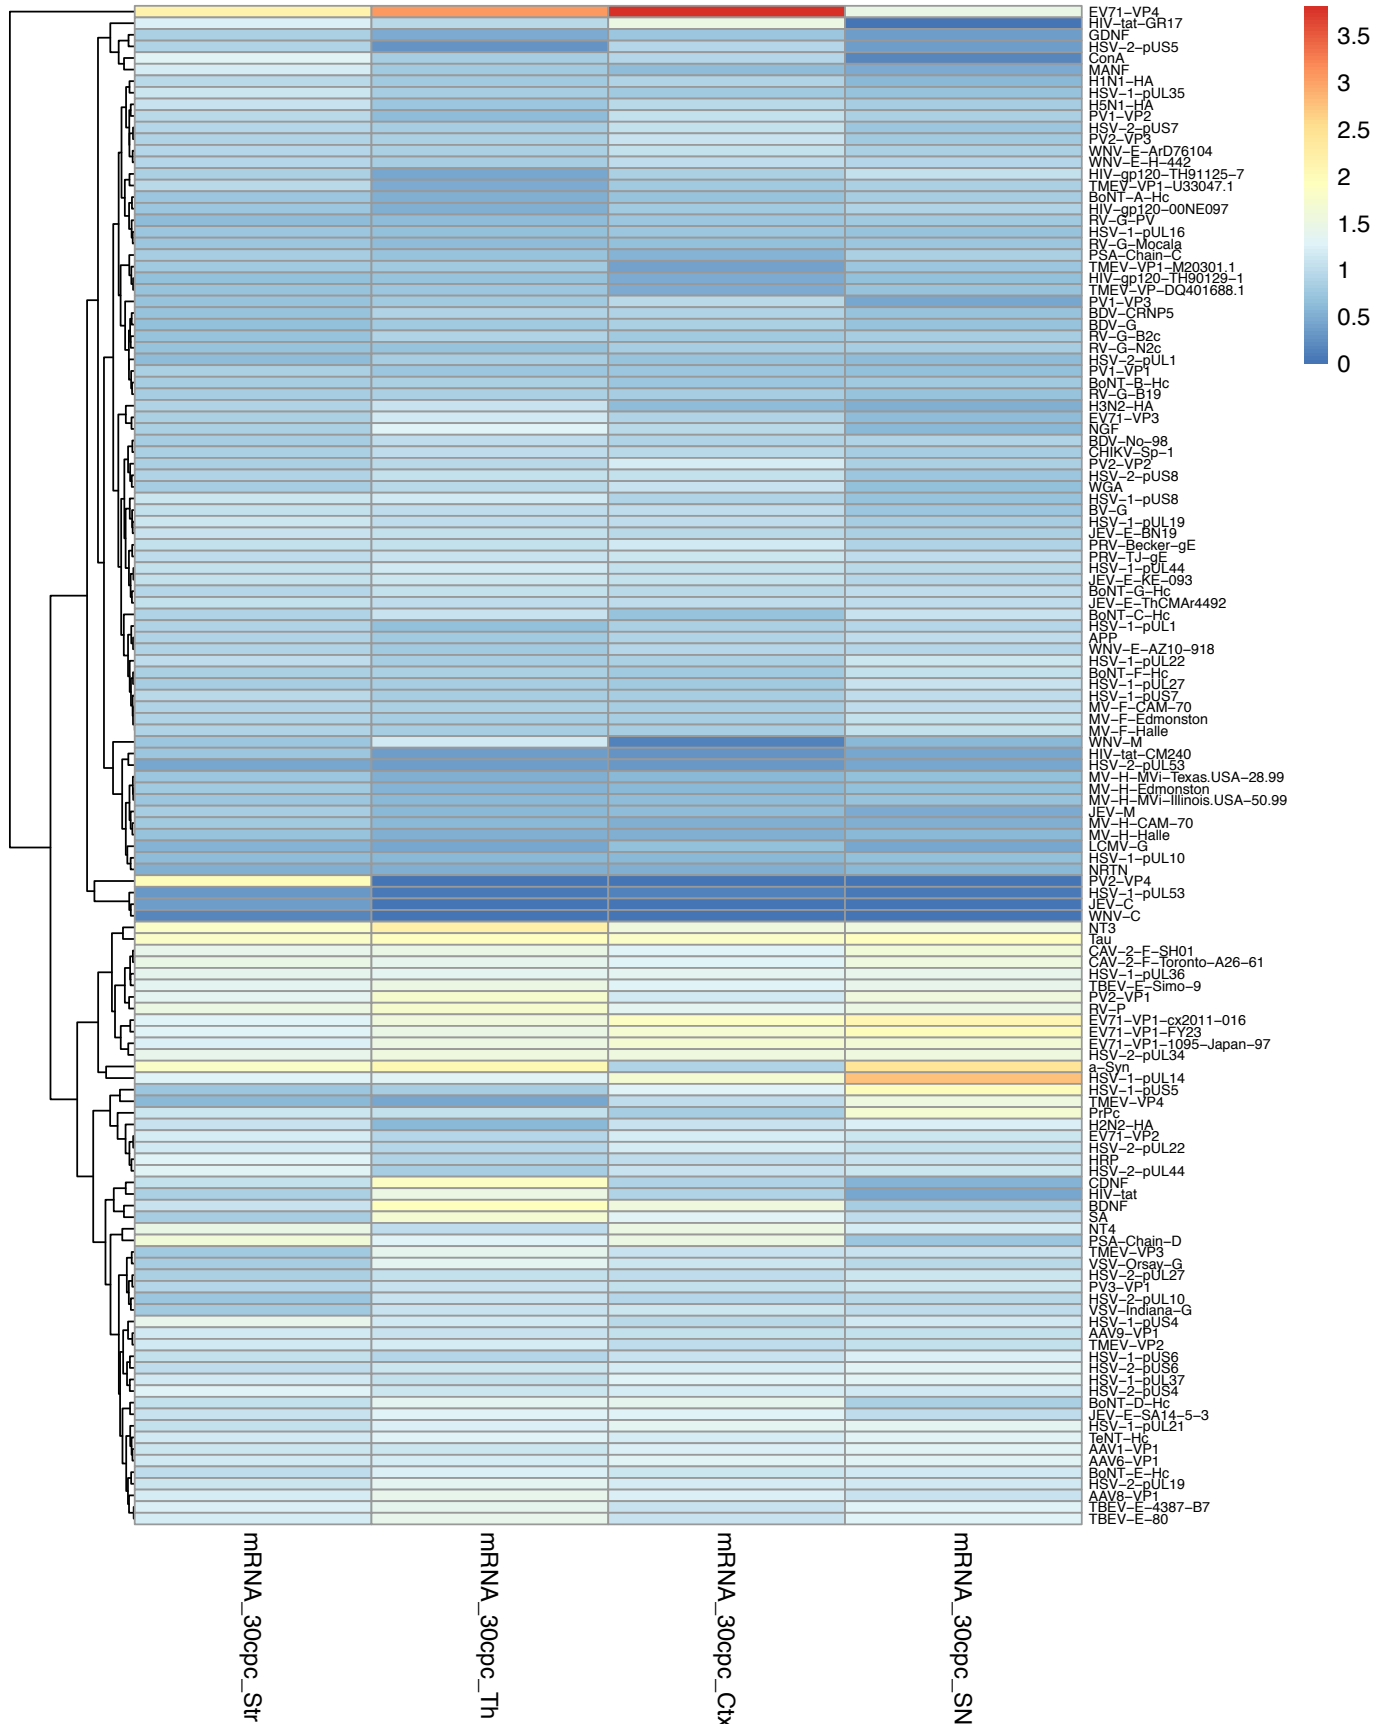

```
plotGene(select.samples.binGene,"refNormBC",c("mRNA_3cpc_Str","mRNA_3cpc_Th","mRNA_3cpc_Ctx","mRNA_3cpc_SN"))
```

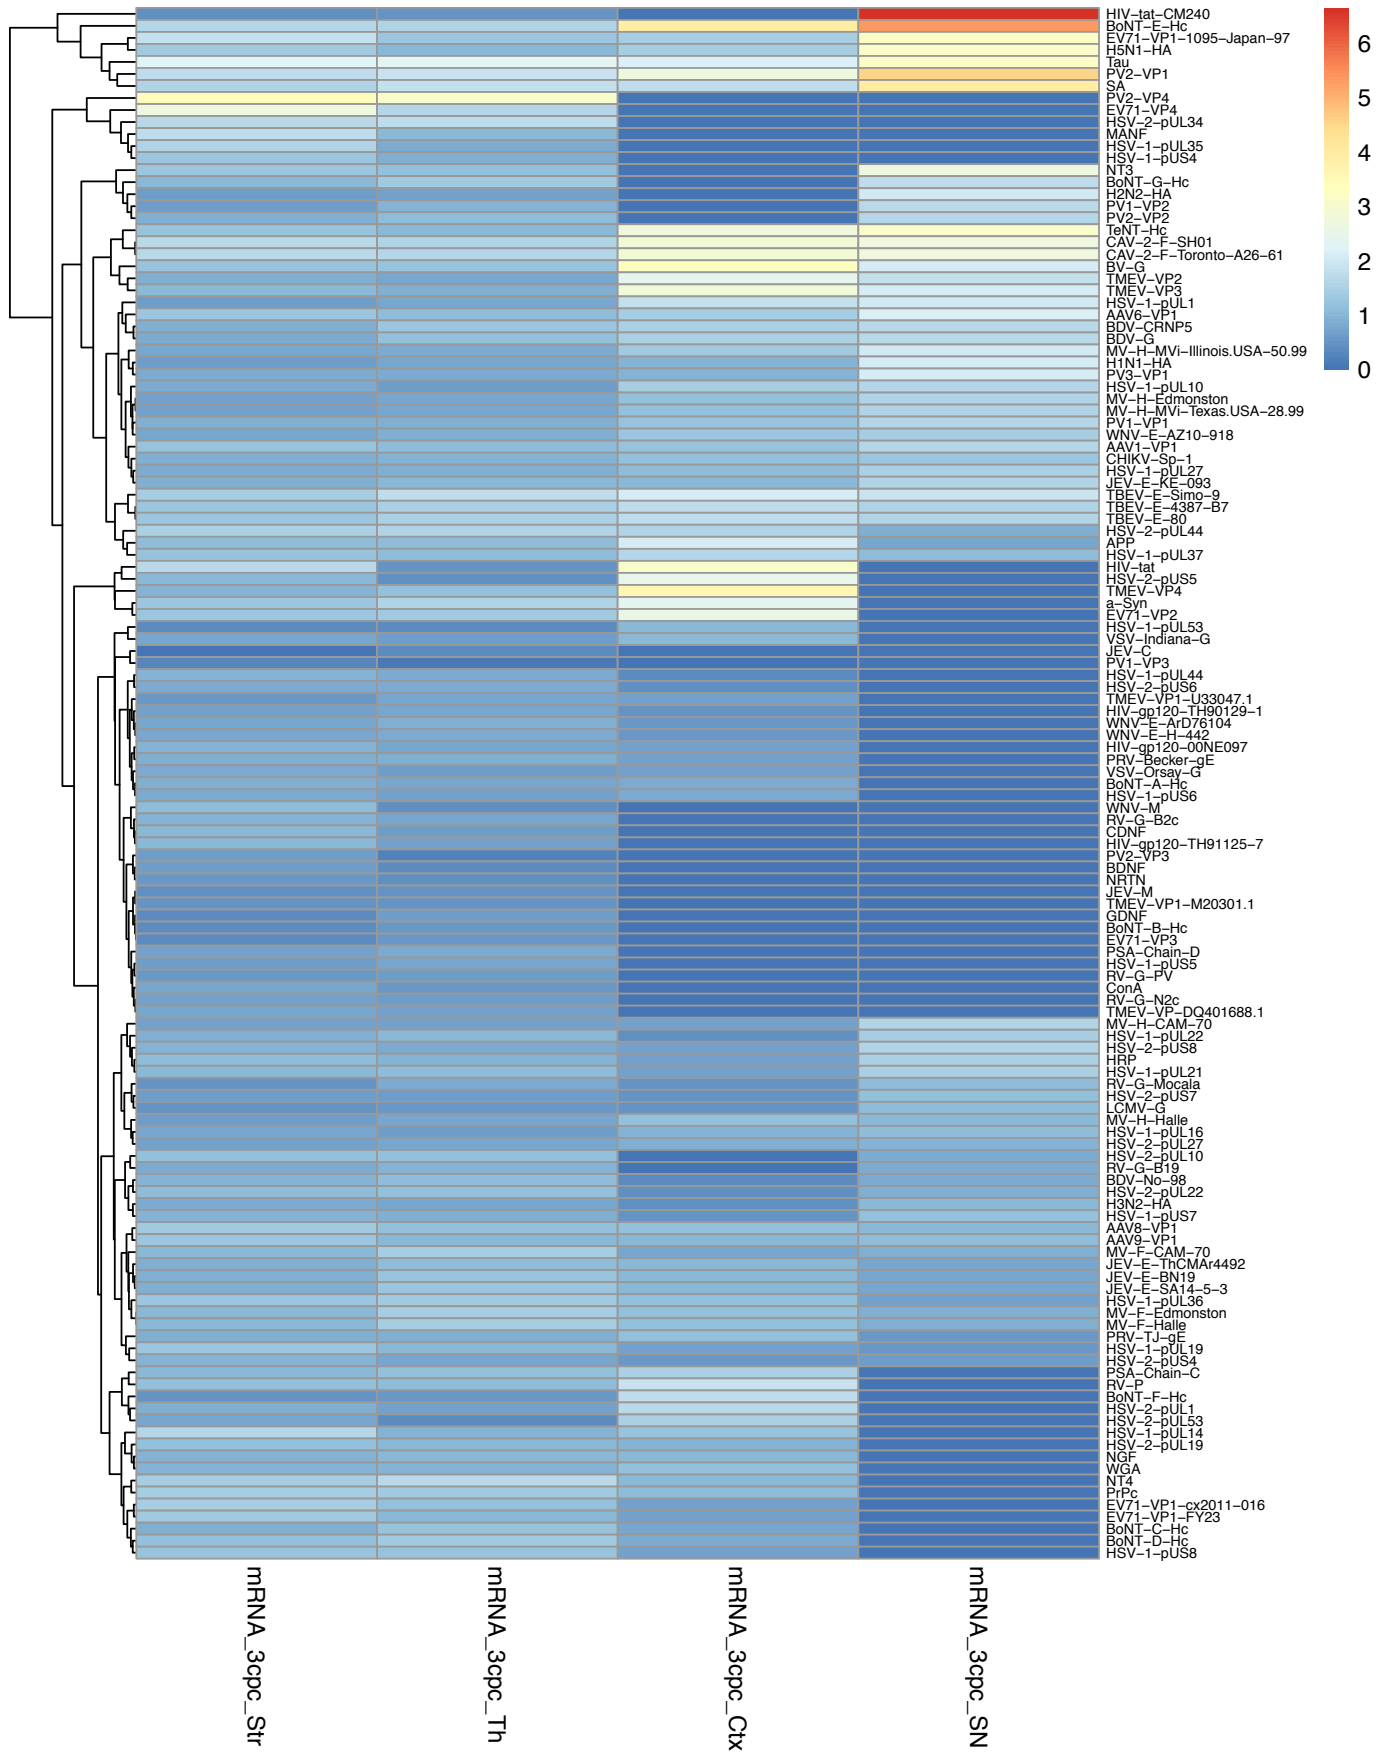

```
plotGene(select.samples.binGene,"refNormBC",c("mRNA_30cpc_Str","mRNA_3cpc_Str","mRNA_30cpc_Th","mRNA_3cpc_Th"))
```

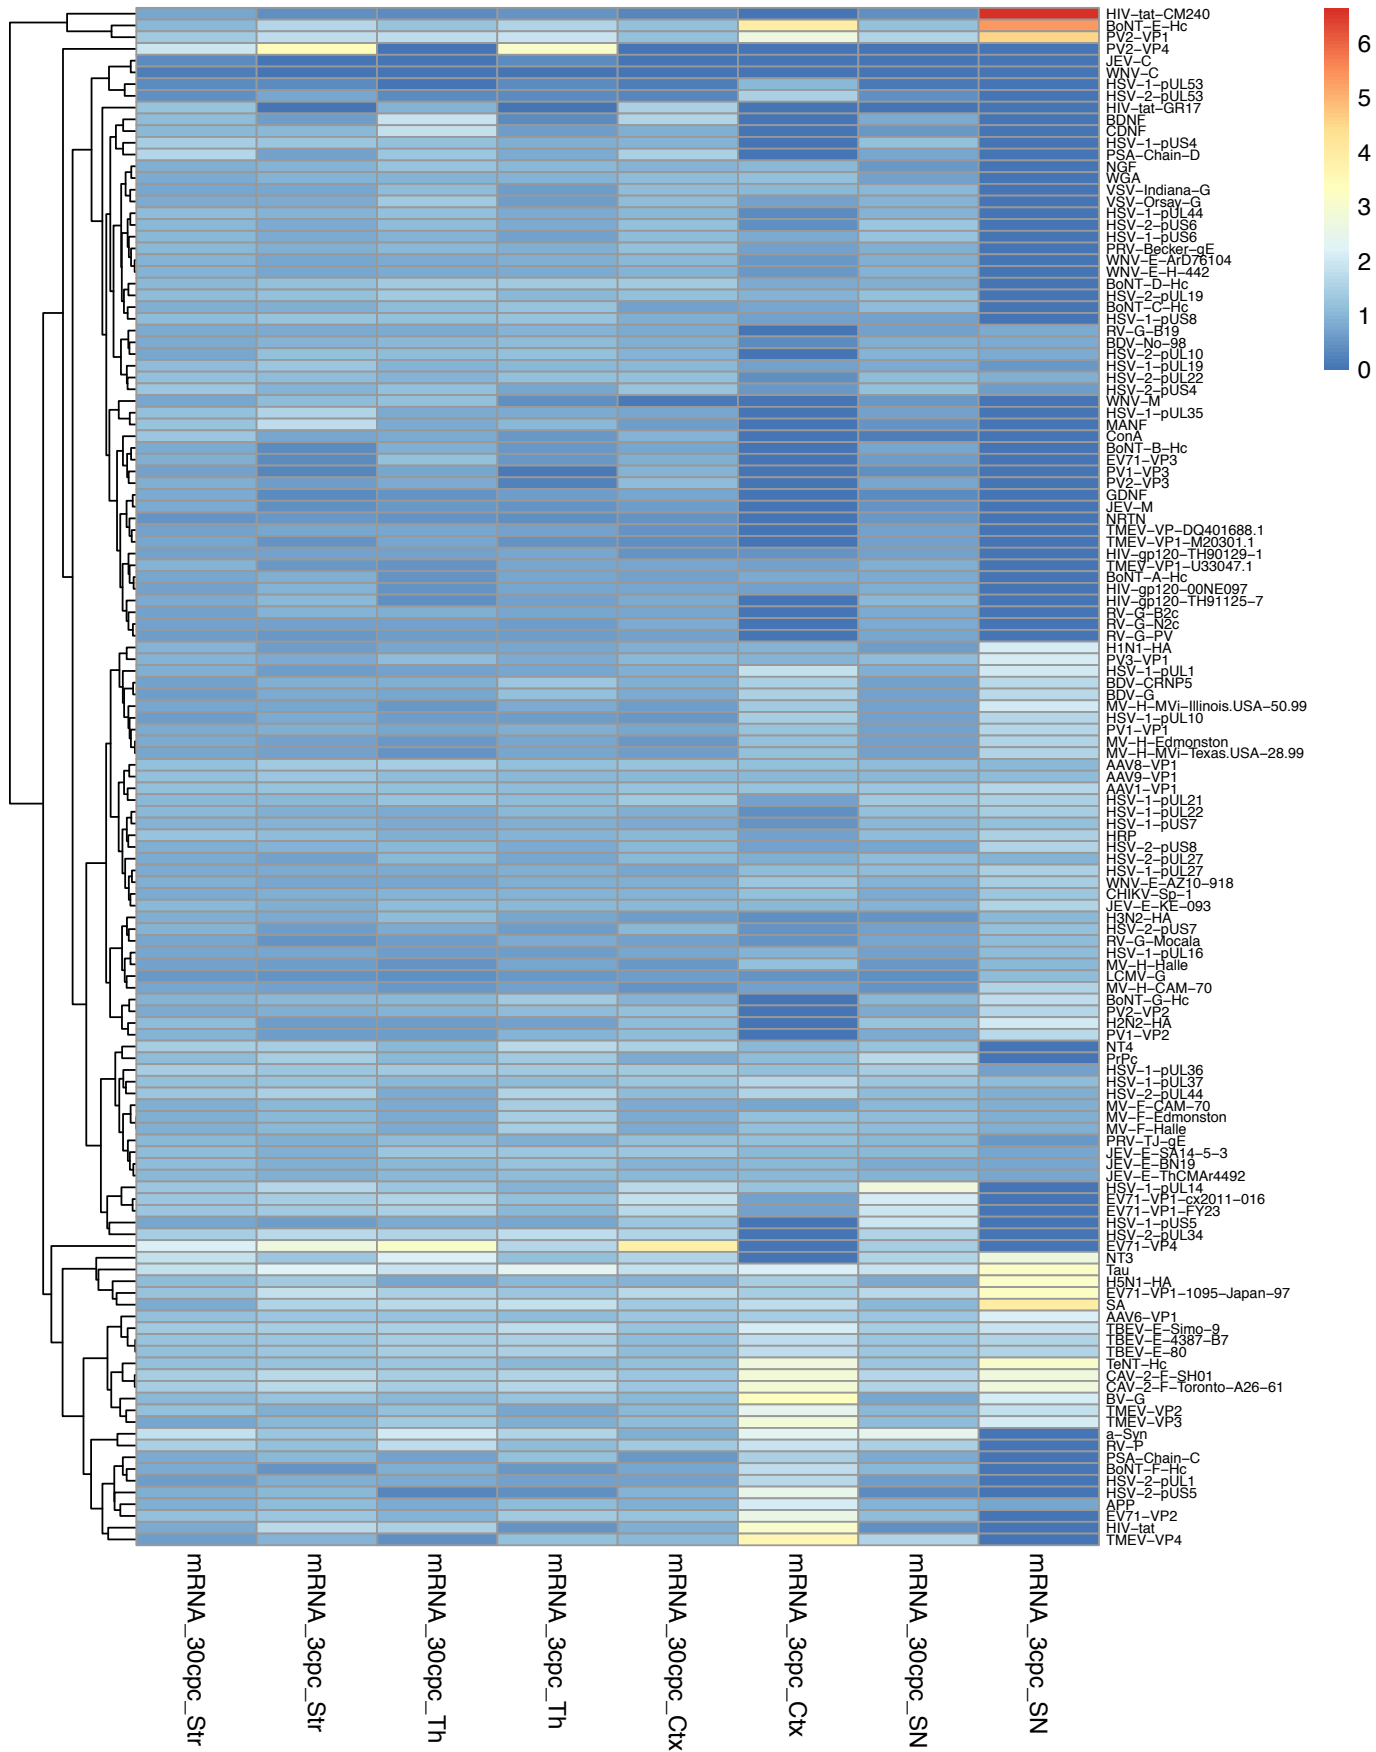

```
plotGene(select.samples.binGene,"refNormBC",c("mRNA_30cpc_pNeuron","mRNA_3cpc_pNeuron","mRNA_30cpc_HEK293T"))
```

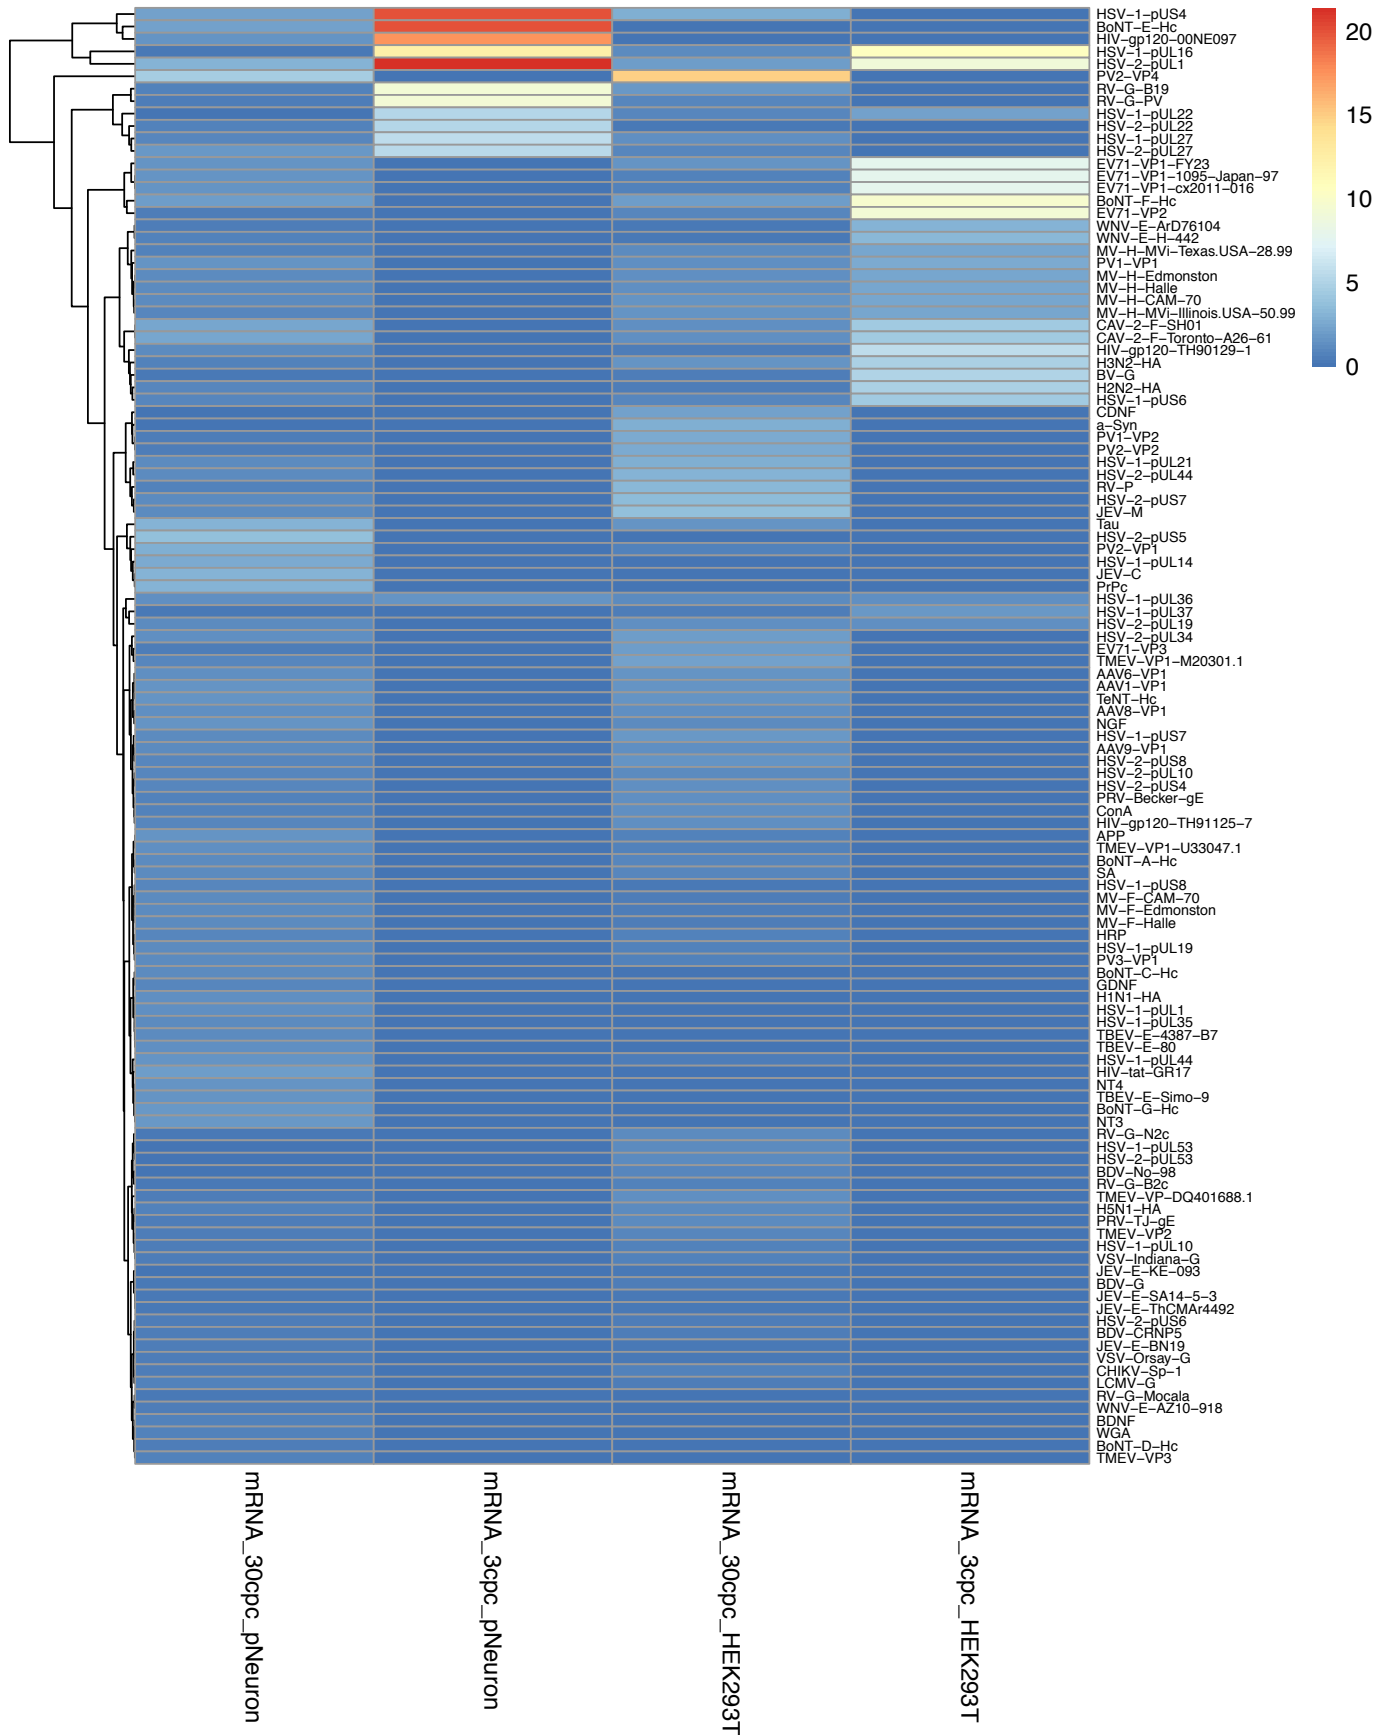

## Selection of top ten fragments per sample

```
setkeyv(select.samples.binPos,c("Group","BCcountNanim","AnimalCount","NormCount"))
setorder(select.samples.binPos,Group,-BCcountanim,-AnimalCount,-BCcount,-NormCount)
setkey(select.samples.binPos,Group)

select.samples.topTwenty <- select.samples.binPos[, head(.SD, 20), by=Group]
select.samples.topTwenty[,c("totBC","seqlength","BCcountN","GeneAA","BCcountNseq"):=NULL]

for (thisGroup in unique(select.samples.topTwenty$Group)){
  out <- select.samples.topTwenty[J(thisGroup)]
  out[,Group:=NULL]
  out[,NormCount:=round(NormCount,digits = 0)]
  setnames(out,c("GeneName","AnimalCount","mismatches","BCcount","NormCount","BCcountNanim"),
            c(thisGroup,"Animal","missM","BCs","nCount","BCsNan"))

  print(knitr::kable(out, format = "latex", booktabs = T) %>% kable_styling(latex_options = c("striped", "
})
```



```

plotPos <- function(select.samples.table,plot.col,sample.select){
  setkeyv(select.samples.table,"Group")
  select.samples.select <- select.samples.table[J(sample.select)]
  eval(parse(text=paste("setorder(select.samples.select,Group, -", plot.col,"",-AnimalCount,-NormCount)", sep=""))
  select.samples.topTen <- select.samples.select[, head(.SD, 10), by=Group]
  select.samples.out <- select.samples.select[select.samples.select$GeneAA %in% select.samples.topTen$GeneAA]
  select.samples.out <- acast(select.samples.out, GeneAA~Group, value.var=plot.col) #Utilizes reshape 2 to
  select.samples.out[is.na(select.samples.out)] <- 0
  select.samples.out <- select.samples.out[,sample.select]
  return(heatmap(select.samples.out, cluster_rows=TRUE, show_rownames=TRUE, cluster_cols=FALSE))
}

plotPos(select.samples.binPos,"NormCount",c("mRNA_30cpc_pNeuron","mRNA_3cpc_pNeuron","mRNA_30cpc_HEK293T","mRNA_3cpc_HEK293T"))

```

```
## setting value
## version R version 3.3.2 (2016-10-31)
## system x86_64, linux-gnu
## ui X11
## language (EN)
## collate en_US.UTF-8
## tz <NA>
## date 2017-09-27
```

```
## Packages -----
```

```
## package      * version  date      source
## acepack      1.4.1    2016-10-29 CRAN (R 3.3.2)
## annotate      1.52.1   2017-09-13 Bioconductor
## AnnotationDbi 1.36.2   2017-09-13 Bioconductor
## AnnotationHub 2.6.5    2017-09-13 Bioconductor
## backports     1.0.5    2017-01-18 url
## base64enc     0.1-3    2015-07-28 cran (@0.1-3)
## Biobase       * 2.34.0   2017-09-13 Bioconductor
## BiocGenerics  * 0.20.0   2017-09-13 Bioconductor
## BiocInstaller 1.24.0   2017-09-13 Bioconductor
## BiocParallel  1.8.2    2017-09-13 Bioconductor
## biomaRt       2.30.0   2017-09-13 Bioconductor
## Biostrings    * 2.42.1   2017-09-13 Bioconductor
## biovizBase    1.22.0   2017-09-13 Bioconductor
## bitops        1.0-6    2013-08-17 CRAN (R 3.3.2)
## BSgenome      1.42.0   2017-09-13 Bioconductor
## checkmate     1.8.2    2016-11-02 cran (@1.8.2)
## cluster       2.0.5    2016-10-08 url
## codetools     0.2-15   2016-10-05 CRAN (R 3.3.2)
## colorspace    1.3-2    2016-12-14 CRAN (R 3.3.2)
## data.table    * 1.10.4   2017-02-01 CRAN (R 3.3.2)
## DBI           0.5-1    2016-09-10 CRAN (R 3.3.2)
## DESeq2        * 1.14.1   2017-09-13 Bioconductor
## devtools      * 1.12.0   2016-12-05 CRAN (R 3.3.2)
## dichromat     2.0-0    2013-01-24 CRAN (R 3.3.2)
## digest        0.6.12   2017-01-27 CRAN (R 3.3.2)
## doParallel    * 1.0.10   2015-10-14 CRAN (R 3.3.2)
## ensemblDb     1.6.2    2017-09-13 Bioconductor
## evaluate      0.10     2016-10-11 url
## foreach       * 1.4.3    2015-10-13 CRAN (R 3.3.2)
## foreign       0.8-67   2016-09-13 url
## formatR       * 1.4      2016-05-09 url
## Formula       1.2-1    2015-04-07 url
## genefilter    1.56.0   2017-09-13 Bioconductor
## geneplotter   1.52.0   2017-09-13 Bioconductor
## GenomeInfoDb  * 1.10.3   2017-09-13 Bioconductor
## GenomicAlignments * 1.10.1   2017-09-13 Bioconductor
## GenomicFeatures 1.26.4   2017-09-13 Bioconductor
## GenomicRanges * 1.26.4   2017-09-13 Bioconductor
## GGally        1.3.0    2016-11-13 CRAN (R 3.3.2)
## ggbio         * 1.22.4   2017-09-13 Bioconductor
## ggplot2       * 2.2.1    2016-12-30 CRAN (R 3.3.2)
## graph         1.52.0   2017-09-13 Bioconductor
## gridExtra     2.2.1    2016-02-29 url
## gtable        0.2.0    2016-02-26 CRAN (R 3.3.2)
## Hmisc         4.0-2    2016-12-31 url
## hms           0.3      2016-11-22 CRAN (R 3.3.2)
```

```

## htmlTable          1.9      2017-01-26 cran (@1.9)
## htmltools          0.3.5    2016-03-21 url
## htmlwidgets        0.8      2016-11-09 cran (@0.8)
## httpuv             1.3.3    2015-08-04 CRAN (R 3.3.2)
## httr               1.2.1    2016-07-03 CRAN (R 3.3.2)
## interactiveDisplayBase 1.12.0 2017-09-13 Bioconductor
## IRanges             * 2.8.2 2017-09-13 Bioconductor
## iterators           * 1.0.8 2015-10-13 CRAN (R 3.3.2)
## kableExtra         * 0.5.2 2017-09-15 CRAN (R 3.3.2)
## knitr              * 1.15.1 2016-11-22 url
## lattice            0.20-34 2016-09-06 url
## latticeExtra       0.6-28 2016-02-09 CRAN (R 3.3.2)
## lazyeval           0.2.0   2016-06-12 CRAN (R 3.3.2)
## locfit             1.5-9.1 2013-04-20 CRAN (R 3.3.2)
## magrittr           1.5      2014-11-22 CRAN (R 3.3.2)
## Matrix             1.2-8   2017-01-20 url
## memoise            1.0.0   2016-01-29 url
## mime               0.5      2016-07-07 CRAN (R 3.3.2)
## munsell            0.4.3   2016-02-13 CRAN (R 3.3.2)
## nnet               7.3-12 2016-02-02 CRAN (R 3.3.2)
## OrganismDbi        1.16.0 2017-09-13 Bioconductor
## pheatmap           * 1.0.8 2015-12-11 CRAN (R 3.3.2)
## plyr               * 1.8.4 2016-06-08 CRAN (R 3.3.2)
## R6                 2.2.0   2016-10-05 CRAN (R 3.3.2)
## RBGL               1.50.0 2017-09-13 Bioconductor
## RColorBrewer       1.1-2   2014-12-07 CRAN (R 3.3.2)
## Rcpp               0.12.9 2017-01-14 url
## RCurl              1.95-4.8 2016-03-01 CRAN (R 3.3.2)
## readr              1.1.1   2017-05-16 CRAN (R 3.3.2)
## reshape            0.8.6   2016-10-21 CRAN (R 3.3.2)
## reshape2          * 1.4.2 2016-10-22 CRAN (R 3.3.2)
## rlang              0.1.2   2017-08-09 CRAN (R 3.3.2)
## rmarkdown          1.6      2017-06-15 CRAN (R 3.3.2)
## rpart              4.1-10 2015-06-29 url
## rprojroot          1.2      2017-01-16 cran (@1.2)
## Rsamtools          * 1.26.2 2017-09-13 Bioconductor
## RSQLite            1.1-2   2017-01-08 CRAN (R 3.3.2)
## rtracklayer        1.34.2 2017-09-13 Bioconductor
## rvest              0.3.2   2016-06-17 CRAN (R 3.3.2)
## S4Vectors          * 0.12.2 2017-09-13 Bioconductor
## scales             0.4.1   2016-11-09 url
## shiny              1.0.0   2017-01-12 CRAN (R 3.3.2)
## stringi            1.1.2   2016-10-01 url
## stringr            1.2.0   2017-02-18 CRAN (R 3.3.2)
## SummarizedExperiment * 1.4.0 2017-09-13 Bioconductor
## survival           2.40-1 2016-10-30 url
## tibble             1.3.4   2017-08-22 CRAN (R 3.3.2)
## VariantAnnotation  1.20.3 2017-09-13 Bioconductor
## withr              1.0.2   2016-06-20 url
## XML                3.98-1.5 2016-11-10 CRAN (R 3.3.2)
## xml2               1.1.1   2017-01-24 CRAN (R 3.3.2)
## xtable             1.8-2   2016-02-05 CRAN (R 3.3.2)
## XVector            * 0.14.1 2017-09-13 Bioconductor
## yaml               2.1.14 2016-11-12 CRAN (R 3.3.2)
## zlibbioc           1.20.0 2017-09-13 Bioconductor

```

# Analysis plots for AAV plasmid library and coverage

*Tomas Bjorklund*

*Thu Nov 2 14:44:12 2017*

This script provides a number of measurements on the AAV plasmid library and the readouts in vitro & in vivo.

```
suppressPackageStartupMessages(library(knitr))
```

## Generation plots for library purity

```
complete.ranges <- readRDS("output/completeLibraryRanges.rds")
purity.table <- data.table(mcols(complete.ranges)$mCount/mcols(complete.ranges)$tCount)
purity.table$BCwidth <- width(mcols(complete.ranges)$BC)

beanplot(data = purity.table$V1, ll = 0.04, what = c(1, 1, 1, 0), bw = "nrd0",
  log = "", main = "Best end recombination analysis", ylab = "Recombination fraction [1 = no recombination]",
  border = NA, col = list("black", c("grey", "white")))
legend("bottomleft", fill = c("black"), legend = c("AAV-lib"))
```

### Best end recombination analysis

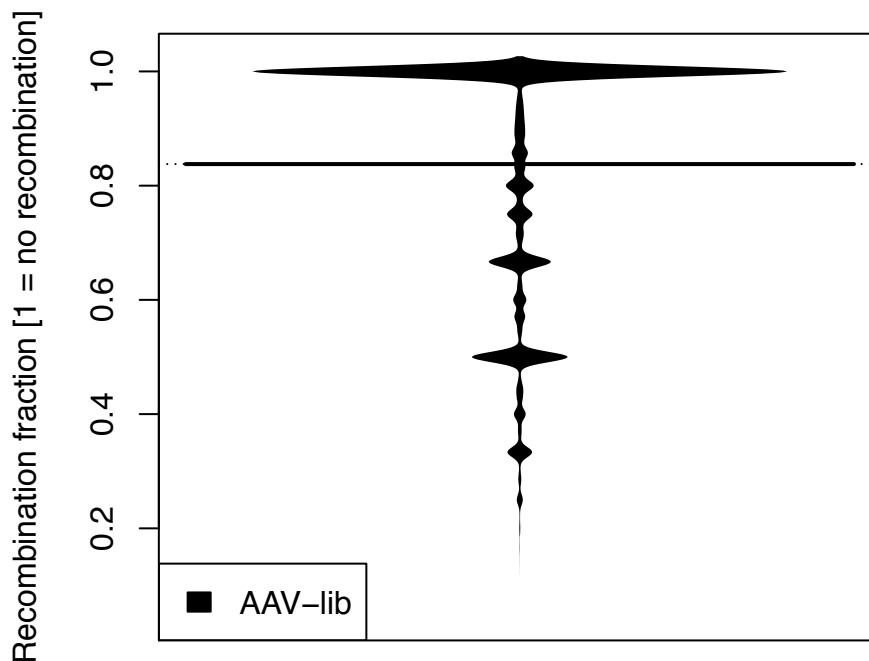

```
fill.values <- c(A = rgb(193, 210, 234, maxColorValue = 255), B = rgb(157, 190,
  217, maxColorValue = 255), C = rgb(38, 64, 135, maxColorValue = 255), D = rgb(157,
  190, 217, maxColorValue = 255), E = rgb(193, 210, 234, maxColorValue = 255))
```

```
names(fill.values) <- c("18", "19", "20", "21", "22")
```

```
ggplot(purity.table, aes(x = BCwidth, fill = as.character(BCwidth))) + geom_histogram(binwidth = 1,
  boundary = 0.5) + theme_bw() + scale_fill_manual(name = "Width", values = fill.values) +
  scale_x_continuous(limit = c(17, 23), breaks = c(seq(18, 22, 1)), expand = c(0,
  0))
```

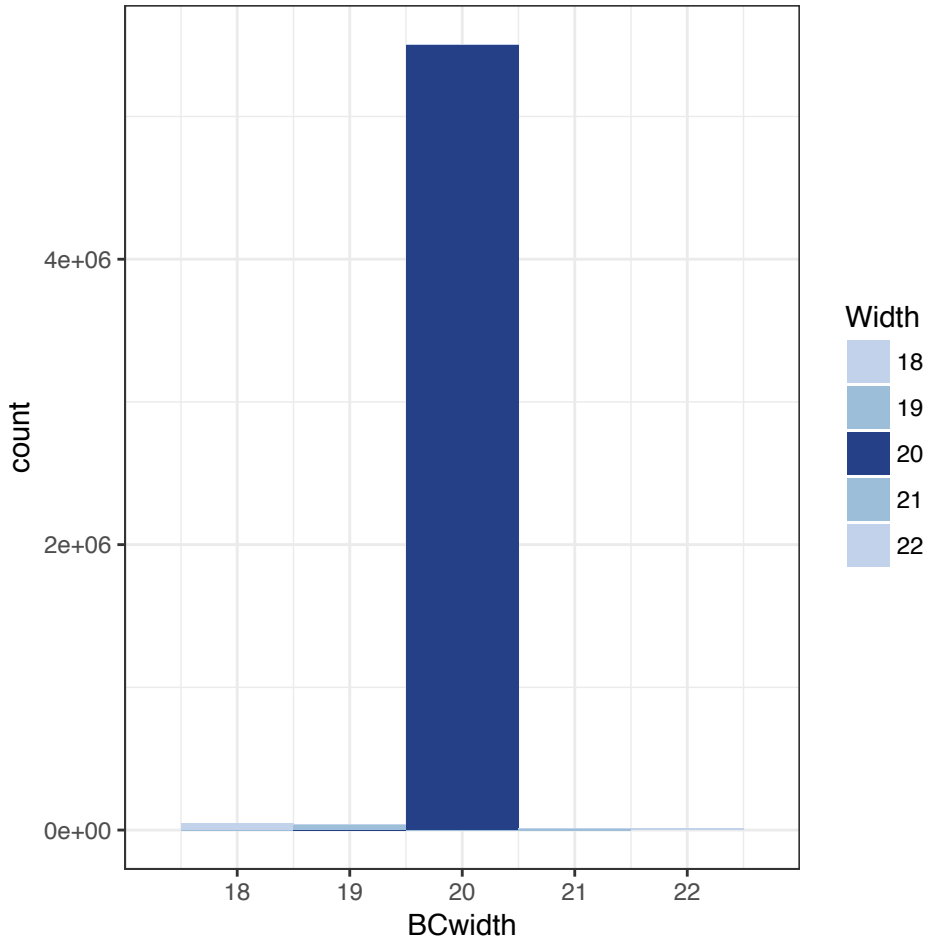

```
opts_chunk$set(fig.width = 8, fig.height = 8)
```

## Plot Venn diagrams of fragments

```
load("data/LUTdna.rda")
complete.library <- readRDS("data/allSamplesDataTable.RDS")
setkey(complete.library, Group)
complete.library <- complete.library[-grep("4wks", Group)]
seq.array <- LUT.dna$LUTnr
seq.lib <- unique(complete.library[J("DNA_pscAAVlib")])$LUTnr
seq.AAV <- unique(complete.library[J("mRNA_All")])$LUTnr
seq.DNAse <- unique(complete.library[grep("DNA_AAVlib_DNAse", Group)])$LUTnr
seq.str <- unique(complete.library[grep("Str", Group)])$LUTnr
seq.Trsp <- unique(complete.library[grep("SN|Ctx|Th", Group)])$LUTnr

venn.area1 <- length(seq.array)
venn.area2 <- length(seq.lib)
```

```

venn.area3 <- length(seq.DNase)
venn.area4 <- length(seq.AAV)
venn.area5 <- length(seq.str)
venn.area6 <- length(seq.Trsp)

isect.Str_Trsp <- length(intersect(seq.str, seq.Trsp))

venn.n12 <- length(intersect(seq.array, seq.lib))
venn.n23 <- length(intersect(seq.lib, seq.DNase))

venn.n13 <- length(intersect(seq.array, seq.DNase))
venn.n123 <- length(intersect(intersect(seq.array, seq.lib), seq.DNase))

output.table <- data.frame(NameArray = character(), NameLib = character(), NameDNase = character(),
  NameAAV = character(), NameStr = character(), NameTrsp = character(), ArrayStart = numeric(),
  ArrayEnd = numeric(), LibStart = numeric(), LibEnd = numeric(), DNaseStart = numeric(),
  DNaseEnd = numeric(), AAVStart = numeric(), AAVend = numeric(), StrStart = numeric(),
  StrEnd = numeric(), TrspStart = numeric(), TrspEnd = numeric(), stringsAsFactors = FALSE)
output.table[1:3, 1] <- c("Array", "None", "None")
output.table[1:3, 2] <- c("Lib", "None", "None")
output.table[1:3, 3] <- c("DNase", "None", "None")
output.table[1:3, 4] <- c("AAV", "None", "None")
output.table[1:3, 5] <- c("Str", "None", "None")
output.table[1:3, 6] <- c("None", "Trsp", "None")
output.table[1:3, 7:18] <- 0
output.table$ArrayEnd[1] <- output.table$LibEnd[2] <- output.table$DNaseEnd[2] <- output.table$AAVend[2] <-
output.table$LibStart[2] <- output.table$LibEnd[1] <- length(intersect(seq.array,
  seq.lib))
output.table$DNaseStart[2] <- output.table$DNaseEnd[1] <- length(intersect(seq.lib,
  seq.DNase))
output.table$AAVStart[2] <- output.table$AAVend[1] <- length(intersect(seq.lib,
  seq.AAV))
output.table$StrStart[2] <- output.table$StrEnd[1] <- length(intersect(seq.AAV,
  seq.str))
output.table$TrspStart[2] <- output.table$TrspEnd[1] <- length(seq.str) - length(intersect(seq.str,
  seq.Trsp))
output.table$TrspStart[3] <- output.table$TrspEnd[2] <- output.table$TrspStart[2] +
  length(seq.Trsp)

fill.values <- c(Array = rgb(193, 210, 234, maxColorValue = 255), Lib = rgb(157,
  190, 217, maxColorValue = 255), DNase = rgb(117, 160, 207, maxColorValue = 255),
  AAV = rgb(38, 64, 135, maxColorValue = 255), Str = rgb(157, 190, 217, maxColorValue = 255),
  Trsp = rgb(193, 210, 234, maxColorValue = 255), None = rgb(255, 255, 255,
  maxColorValue = 255, alpha = 0))

ggplot(output.table) + scale_x_continuous(limit = c(0, 12), breaks = c(seq(1,
  11, 2)), expand = c(0, 0)) + scale_y_continuous(breaks = c(seq(0, 9000,
  15000))) + scale_fill_manual(name = "Library", values = fill.values) + theme(aspect.ratio = 1) +
  geom_rect(data = output.table, aes(fill = NameTrsp, ymax = TrspEnd, ymin = TrspStart,
  xmax = 11.95, xmin = 10.05)) + geom_rect(data = output.table, aes(fill = NameStr,
  ymax = StrEnd, ymin = StrStart, xmax = 9.95, xmin = 8.05)) + geom_rect(data = output.table,
  aes(fill = NameAAV, ymax = AAVend, ymin = AAVStart, xmax = 7.95, xmin = 6.05)) +
  geom_rect(data = output.table, aes(fill = NameDNase, ymax = DNaseEnd, ymin = DNaseStart,

```

```

xmax = 5.95, xmin = 4.05)) + geom_rect(data = output.table, aes(fill = NameLib,
ymax = LibEnd, ymin = LibStart, xmax = 3.95, xmin = 2.05)) + geom_rect(data = output.table,
aes(fill = NameArray, ymax = ArrayEnd, ymin = ArrayStart, xmax = 1.95, xmin = 0)) +
coord_polar(theta = "y")

```

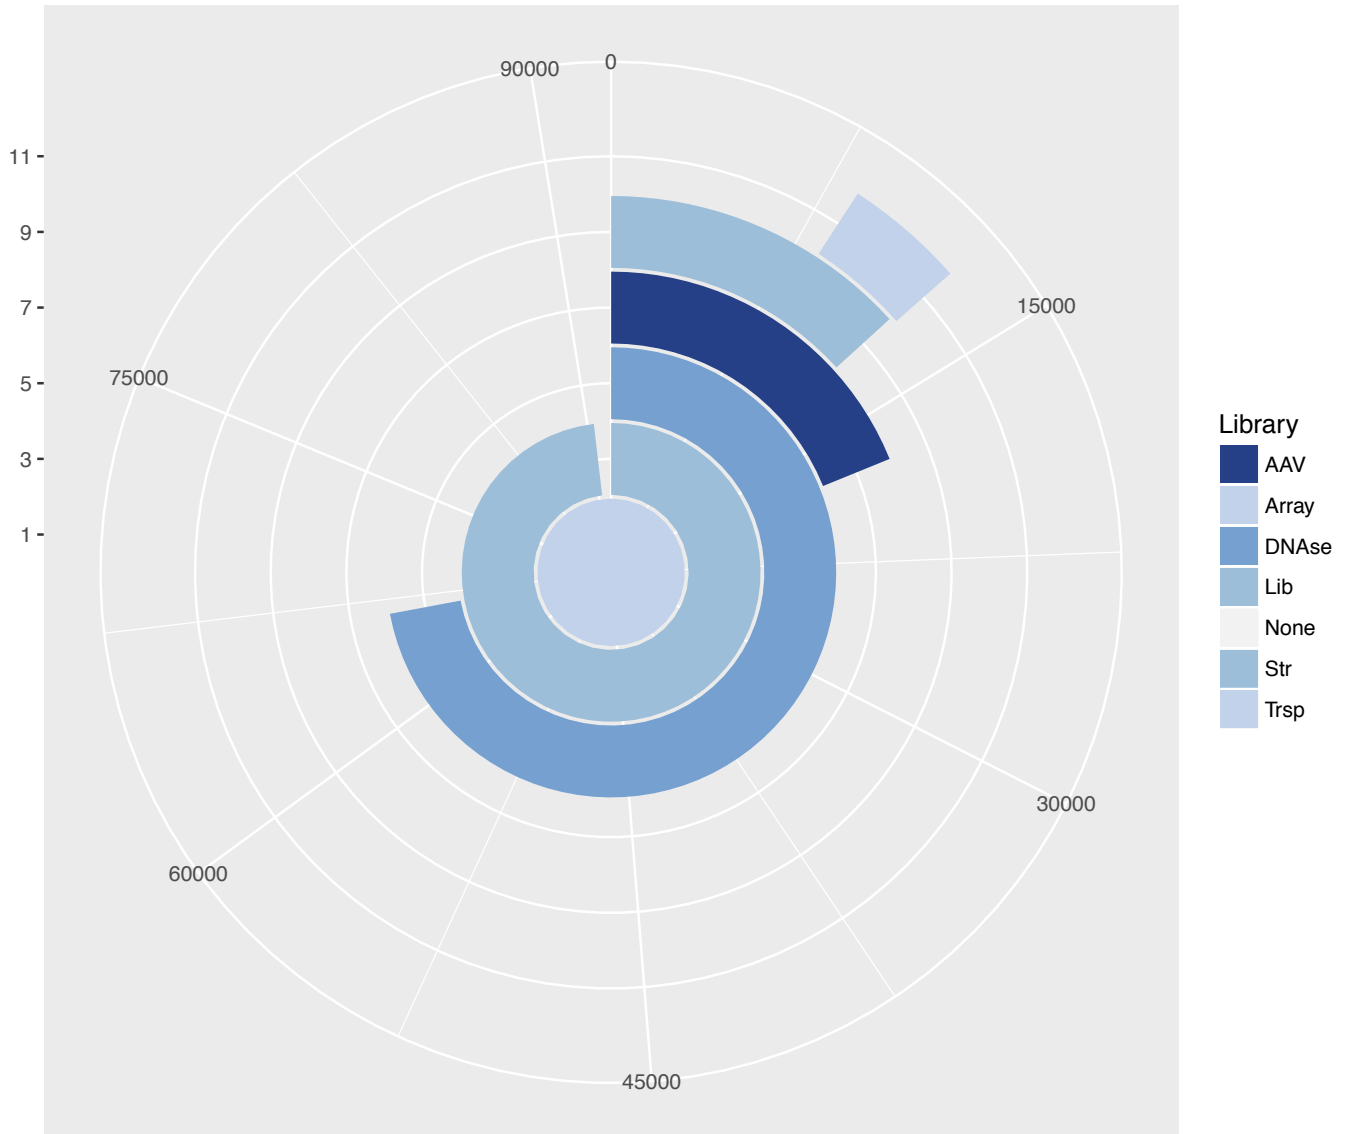

```

opts_chunk$set(fig.width = 5, fig.height = 5)

```

```

knitr::kable(output.table, format = "latex", booktabs = T) %>% kable_styling(latex_options = c("striped",
"scale_down", "repeat_header")) %>% landscape()

```

| NameArray | NameLib | NameDNase | NameAAV | NameStr | NameTrsp | ArrayStart | ArrayEnd | LibStart | LibEnd | DNaseStart | DNaseEnd | AAVStart | AAVend | StrStart | StrEnd | TrspStart | TrspEnd |
|-----------|---------|-----------|---------|---------|----------|------------|----------|----------|--------|------------|----------|----------|--------|----------|--------|-----------|---------|
| Array     | Lib     | DNase     | AAV     | Str     | None     | 0          | 92343    | 0        | 90635  | 0          | 66531    | 0        | 17401  | 0        | 12240  | 0         | 8483    |
| None      | None    | None      | None    | None    | Trsp     | 0          | 0        | 90635    | 92343  | 66531      | 92343    | 17401    | 92343  | 12240    | 92343  | 8483      | 12474   |
| None      | None    | None      | None    | None    | None     | 0          | 0        | 0        | 0      | 0          | 0        | 0        | 0      | 0        | 0      | 12474     | 92343   |



## Barcode Venn diagrams for 30cpc and 3cpc DNase resistant libraries

```
total.30cpc <- unique(complete.library[grep("DNA_AAVlib_DNase_30cpc", Group)]$BC)
total.3cpc <- unique(complete.library[grep("DNA_AAVlib_DNase_3cpc", Group)]$BC)

total.30cpc <- names(table(strsplit(paste(total.30cpc, collapse = ","), ",")))
total.3cpc <- names(table(strsplit(paste(total.3cpc, collapse = ","), ",")))

venn.area1 <- length(total.30cpc)
venn.area2 <- length(total.3cpc)

venn.n12 <- length(intersect(total.30cpc, total.3cpc))

venn.colors <- c("cornflower blue", "red")
grid.newpage()
venn.plot <- draw.pairwise.venn(area1 = venn.area1, area2 = venn.area2, cross.area = venn.n12,
  scaled = TRUE, fill = venn.colors, alpha = 0.3, lty = "blank", cex = 2,
  cat.cex = 2, cat.col = venn.colors, category = c("30cpc", "3cpc"))
grid.draw(venn.plot)
```

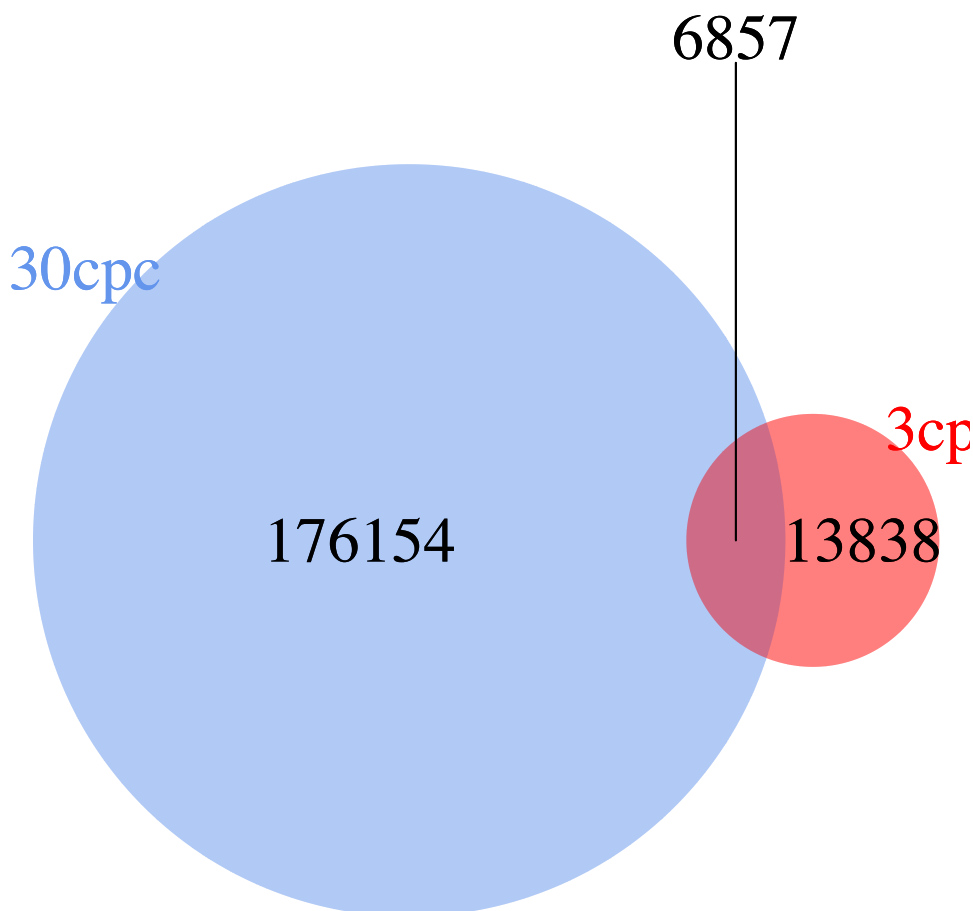

## Fragment Venn diagrams for 30cpc and 3cpc DNase resistant libraries

```
total.30cpc <- unique(complete.library[grep("DNA_AAVlib_DNase_30cpc", Group)]$Sequence)
total.3cpc <- unique(complete.library[grep("DNA_AAVlib_DNase_3cpc", Group)]$Sequence)
```

```

venn.area1 <- length(total.30cpc)
venn.area2 <- length(total.3cpc)

venn.n12 <- length(intersect(total.30cpc, total.3cpc))

grid.newpage()
venn.plot <- draw.pairwise.venn(area1 = venn.area1, area2 = venn.area2, cross.area = venn.n12,
  scaled = TRUE, fill = venn.colors, alpha = 0.3, lty = "blank", cex = 2,
  cat.cex = 2, cat.col = venn.colors, category = c("30cpc", "3cpc"))
grid.draw(venn.plot)

```

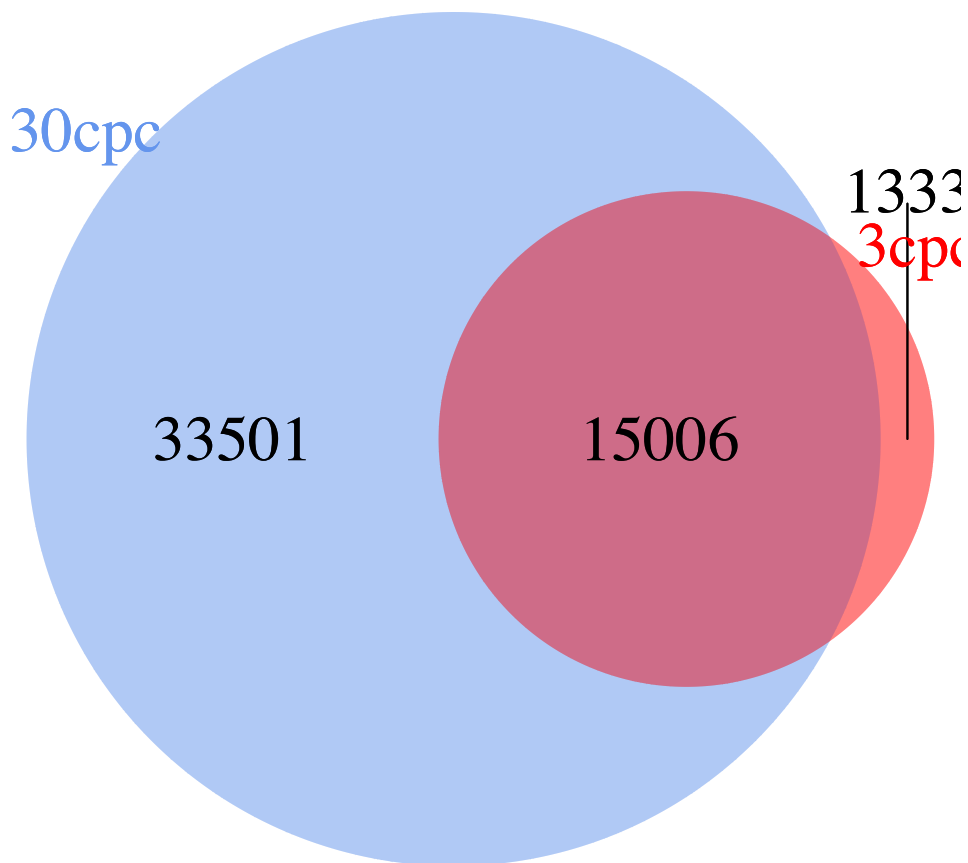

## Barcode Venn diagrams for 30cpc and 3cpc infective libraries

```

RNA.library <- complete.library[-grep("DNase", Group)]
total.30cpc <- unique(RNA.library[grep("30cpc", Group)]$BC)
total.3cpc <- unique(RNA.library[grep("3cpc", Group)]$BC)

total.30cpc <- names(table(strsplit(paste(total.30cpc, collapse = ","), ",")))
total.3cpc <- names(table(strsplit(paste(total.3cpc, collapse = ","), ",")))

venn.area1 <- length(total.30cpc)

```

```

venn.area2 <- length(total.3cpc)

venn.n12 <- length(intersect(total.30cpc, total.3cpc))

venn.colors <- c("cornflower blue", "red")
grid.newpage()
venn.plot <- draw.pairwise.venn(area1 = venn.area1, area2 = venn.area2, cross.area = venn.n12,
  scaled = TRUE, fill = venn.colors, alpha = 0.3, lty = "blank", cex = 2,
  cat.cex = 2, cat.col = venn.colors, category = c("30cpc", "3cpc"))
grid.draw(venn.plot)

```

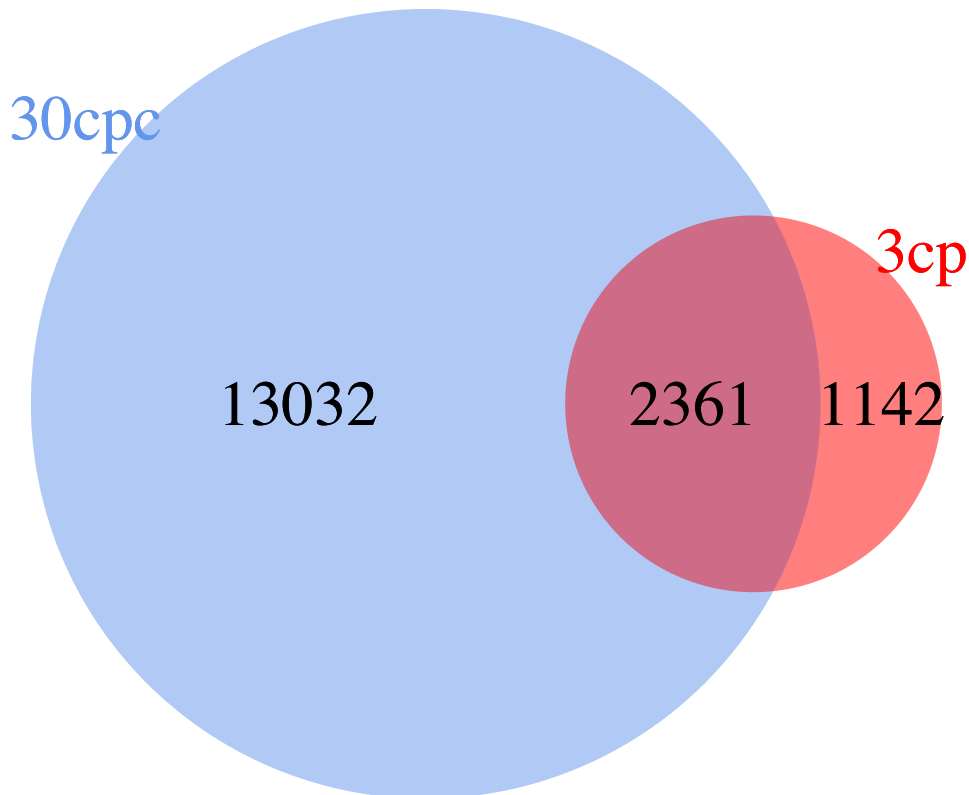

## Fragment Venn diagrams for 30cpc and 3cpc infective libraries

```

total.30cpc <- unique(RNA.library[grep("30cpc", Group)]$Sequence)
total.3cpc <- unique(RNA.library[grep("3cpc", Group)]$Sequence)

venn.area1 <- length(total.30cpc)
venn.area2 <- length(total.3cpc)

venn.n12 <- length(intersect(total.30cpc, total.3cpc))

grid.newpage()

```

```
venn.plot <- draw.pairwise.venn(area1 = venn.area1, area2 = venn.area2, cross.area = venn.n12,  
  scaled = TRUE, fill = venn.colors, alpha = 0.3, lty = "blank", cex = 2,  
  cat.cex = 2, cat.col = venn.colors, category = c("30cpc", "3cpc"))  
grid.draw(venn.plot)
```

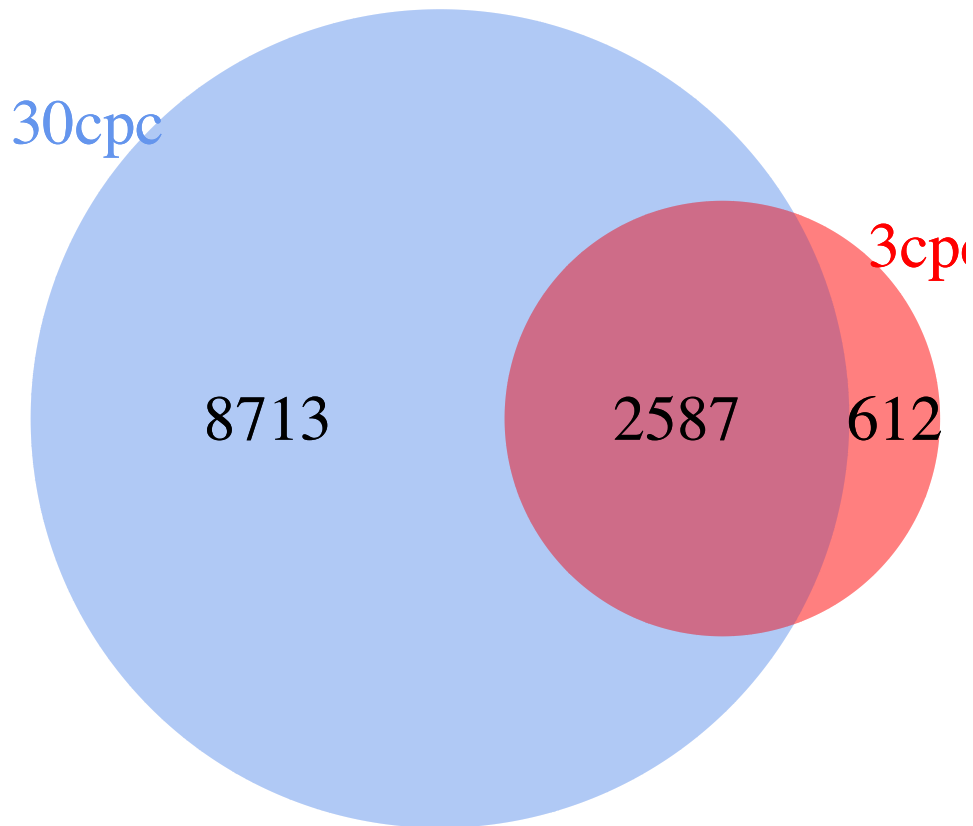

# Top 23 connectivity analysis output

*Tomas Bjorklund*

*Wed Nov 1 19:50:32 2017*

This script presents top 23 candidates as connectivity graph.

```
suppressPackageStartupMessages(library(knitr))
```

## Selection of relevant samples

```
select.samples <- readRDS("data/allSamplesDataTable.RDS")
select.samples <- select.samples[-grep("4wks|mRNA_3cpc_pNeuron_RNA", select.samples$Group),
]

select.samples.merge <- data.table::copy(select.samples)
select.samples.merge$Lib <- "30cpc"
select.samples.merge$Lib[grep("3cpc", select.samples.merge$Group)] <- "3cpc"
select.samples.merge[, `:=`(Group, gsub("_30cpc|_3cpc", "", Group))]

setkey(select.samples.merge, Group)
select.samples.merge.binPos <- select.samples.merge[c("mRNA_Str", "mRNA_Th",
"mRNA_Ctx", "mRNA_SN")]
```

## Summarize data over each aa

```
setorder(select.samples.merge.binPos, Group, GeneName, start, width)
winWidth = 1
windowTable <- select.samples.merge.binPos[, c("GeneName", "start", "width"),
with = FALSE]
windowTable <- unique(windowTable, by = c("GeneName", "start", "width"))
windowTable <- windowTable[, seq(start, (start + width - winWidth)), by = c("GeneName",
"start", "width")]
setnames(windowTable, "V1", "winStart")
windowTable[, `:=`(winEnd, winStart + winWidth - 1)]
setkeyv(windowTable, c("GeneName", "start", "width"))
setkeyv(select.samples.merge.binPos, c("GeneName", "start", "width"))
select.samples.windowBin <- select.samples.merge.binPos[windowTable, nomatch = 0,
allow.cartesian = TRUE]

setkeyv(select.samples.windowBin, c("Group", "GeneName", "winStart", "winEnd"))
select.samples.windowBin.out <- select.samples.windowBin[, list(Overlaps = .N,
BCcount = length(table(strsplit(paste(t(BC), collapse = ","), ","))), NormCount = mean(log2(RNACount +
1)), AnimalCount = length(table(strsplit(paste(t(Animals), collapse = ","),
","))), LUTnrs = paste(unique(names(table(strsplit(paste(t(LUTnrs),
collapse = ","), ","))))), collapse = ","), mainStruct = paste(unique(structure),
collapse = ","), mainLibs = paste(unique(Lib), collapse = ","), libCount = length(unique(Lib)),
mismatches = median(mismatches)), by = c("Group", "GeneName", "winStart",
"winEnd", "seqlength")]
```

## Identify local maxima for each gene and sample

```
select.samples.windowBin <- data.table::copy(select.samples.windowBin.out)
select.samples.windowBin[, `:=`(Score, BCcount + AnimalCount + libCount)]
setorder(select.samples.windowBin, Group, -Score, -AnimalCount, -BCcount, -libCount,
  -NormCount, GeneName, winStart)
select.samples.windowBin[, `:=`(Rank, seq(.N)), by = c("Group")]
setorder(select.samples.windowBin, Group, GeneName, winStart, -Score)

windowTable <- select.samples.windowBin[, c("Group", "GeneName", "seqlength"),
  with = FALSE]
windowTable <- unique(windowTable, by = c("Group", "GeneName", "seqlength"))
windowTable <- windowTable[, seq(seqlength), by = c("Group", "GeneName")]
setnames(windowTable, "V1", "winStart")
setkeyv(windowTable, c("Group", "GeneName", "winStart"))
setkeyv(select.samples.windowBin, c("Group", "GeneName", "winStart"))
select.samples.windowBin <- select.samples.windowBin[windowTable]
select.samples.windowBin$Score[is.na(select.samples.windowBin$Score)] <- 0

select.samples.windowBin$LUTnrs[is.na(select.samples.windowBin$LUTnrs)] <- seq(length(which(is.na(select.samples.windowBin$Score))), by = 1)

setorder(select.samples.windowBin, Group, GeneName, -winStart)
select.samples.windowBin.locMax <- data.table::copy(select.samples.windowBin)
select.samples.windowBin.locMax[, `:=`(Peak, as.logical(extract(turnpoints(Score),
  peak = 1, pit = 0))), by = c("Group", "GeneName")] #,proba=0.0001

setorder(select.samples.windowBin.locMax, Group, GeneName, winStart)
select.samples.windowBin.locMax <- select.samples.windowBin.locMax[select.samples.windowBin.locMax$Peak,
  ]
select.samples.windowBin.locMax[, `:=`(Peak, NULL)]

setorder(select.samples.windowBin.locMax, Group, Rank, -Score, GeneName, winStart)
select.samples.windowBin.locMax <- unique(select.samples.windowBin.locMax, by = c("Group",
  "LUTnrs"))
```

## Make binning for 22aa fragment length

```
# Connect highest scoring fragments

setorder(select.samples.windowBin.locMax, Group, -Score, -AnimalCount, -BCcount,
  -libCount, -NormCount, GeneName, winStart)
setkey(select.samples.windowBin.locMax, Group)
select.samples.windowBin.locMax[, `:=`(Rank2, seq(.N)), by = c("Group")]

select.samples.topSelect <- select.samples.windowBin.locMax[, head(.SD, 35),
  by = Group]

setorder(select.samples.topSelect, Group, GeneName, winStart)
winWidth = 21
windowTable <- select.samples.topSelect[, c("GeneName", "winStart"), with = FALSE]
windowTable <- unique(windowTable, by = c("GeneName", "winStart"))
```

```

windowTable <- windowTable[, seq((winStart - winWidth), (winStart)), by = c("GeneName",
  "winStart")]
setnames(windowTable, "V1", "binBaseStart")
windowTable <- windowTable[binBaseStart > 0, ]
windowTable[, `:=`(binBaseEnd, binBaseStart + winWidth)]
scoreSelect <- select.samples.topSelect[, c("Group", "GeneName", "winStart",
  "Score"), with = FALSE]
setkeyv(windowTable, c("GeneName", "winStart"))
setkeyv(scoreSelect, c("GeneName", "winStart"))
scoreSelect <- scoreSelect[windowTable, allow.cartesian = TRUE]

scoreSelect[, `:=`(mCount, length(unique(Group))), by = c("GeneName", "binBaseStart")]
scoreSelect[, `:=`(oCount, .N), by = c("GeneName", "binBaseStart")]
scoreSelect[, `:=`(tCount, mCount + oCount)]
scoreSelect[, `:=`(offset, abs(binBaseStart + 6 - mean(winStart))), c("GeneName",
  "binBaseStart")]
# scoreSelect <- scoreSelect[mCount>oCount,]
setorder(scoreSelect, GeneName, winStart, -tCount, binBaseStart, -offset)

scoreSelect <- scoreSelect[, head(.SD, 1), by = c("GeneName", "winStart")]

scoreSelect <- scoreSelect[, c("GeneName", "winStart", "binBaseStart", "binBaseEnd"),
  with = FALSE]
setkeyv(scoreSelect, c("GeneName", "winStart"))
setkeyv(select.samples.windowBin.locMax, c("GeneName", "winStart"))

select.samples.windowBin.locMax.bin <- scoreSelect[select.samples.windowBin.locMax,
  nomatch = 0]
setorder(select.samples.windowBin.locMax.bin, GeneName, -binBaseStart, -Score,
  Group)

select.samples.windowBin.locMerge <- select.samples.windowBin.locMax.bin[, head(.SD,
  1), by = c("GeneName", "binBaseStart", "binBaseEnd", "Group")]
select.samples.windowBin.locMerge <- unique(select.samples.windowBin.locMerge,
  by = c("Group", "GeneName", "LUTnrs"))

```

## Selection of top twenty fragments per sample

```

setorder(select.samples.windowBin.locMerge, Group, -Score, -AnimalCount, -BCcount,
  -libCount, -NormCount, GeneName, binBaseStart)
setkey(select.samples.windowBin.locMerge, Group)

select.samples.topTwenty <- select.samples.windowBin.locMerge[, head(.SD, 25),
  by = Group]
select.samples.topTwenty <- select.samples.topTwenty[, c("GeneName", "binBaseStart",
  "binBaseEnd"), with = FALSE]
select.samples.topTwenty <- unique(select.samples.topTwenty, by = c("GeneName",
  "binBaseStart"))

setorder(select.samples.windowBin, Group, -Score, -AnimalCount, -BCcount, -libCount,
  -NormCount, GeneName, winStart)
select.samples.windowBin[, `:=`(Rank, seq(.N)), by = c("Group")]
setkeyv(scoreSelect, c("GeneName", "winStart"))
setkeyv(select.samples.windowBin, c("GeneName", "winStart"))

```

```

select.samples.windowBin <- scoreSelect[select.samples.windowBin, nomatch = 0]
setorder(select.samples.windowBin, Group, GeneName, binBaseStart, -Score)
select.samples.windowBin.Bin <- unique(select.samples.windowBin, by = c("Group",
  "GeneName", "binBaseStart"))

setkeyv(select.samples.topTwenty, c("GeneName", "binBaseStart"))
setkeyv(select.samples.windowBin, c("GeneName", "binBaseStart"))
select.samples.windowBin.allTop <- select.samples.windowBin[select.samples.topTwenty,
  nomatch = 0]
select.samples.windowBin.allTop <- unique(select.samples.windowBin.allTop, by = c("Group",
  "LUTnrs"))
setorder(select.samples.windowBin.allTop, Group, GeneName, binBaseStart, -Score)
select.samples.windowBin.allTop <- unique(select.samples.windowBin.allTop, by = c("Group",
  "GeneName", "binBaseStart"))

select.samples.windowBin.allTop[, `:=`(GeneAA, paste(GeneName, " [", binBaseStart +
  floor(winWidth/2), "]", sep = "")), by = Group]
setorder(select.samples.windowBin.allTop, Group, Rank)

```

## Plotting ranked order

```

setkey(select.samples.windowBin.allTop, Group)

v1 <- select.samples.windowBin.allTop["mRNA_Str"]$GeneAA
v2 <- select.samples.windowBin.allTop["mRNA_Th"]$GeneAA
v3 <- select.samples.windowBin.allTop["mRNA_Ctx"]$GeneAA
v4 <- select.samples.windowBin.allTop["mRNA_SN"]$GeneAA

o <- 0.05
DF <- data.table(x = c(rep(1, length(v1)), rep(2, length(v2)), rep(3, length(v3)),
  rep(4, length(v4))), x1 = c(rep(1, length(v1)), rep(2, length(v2)), rep(3,
  length(v3)), rep(4, length(v4))), y = c(rev(seq_along(v1)), rev(seq_along(v2)),
  rev(seq_along(v3)), rev(seq_along(v4))), g = c(v1, v2, v3, v4))
DF[, `:=`(groupMax, max(y)), by = x]
allMax <- max(DF$y)
DF[, `:=`(y, y - groupMax + allMax)]

ggplot(DF, aes(x = x, y = y, group = g, label = g)) + geom_path(aes(x = x1),
  size = 0.3, color = "blue") + geom_text(size = 1.8) + theme_minimal() +
  theme(axis.title = element_blank(), axis.text = element_blank(), axis.ticks = element_blank(),
  panel.grid = element_blank())

```



# Three sample pairwise sample analysis output

*Tomas Bjorklund*

*Wed Nov 1 19:56:43 2017*

This is the final script presenting top candidates and overview plots.

```
suppressPackageStartupMessages(library(knitr))
```

## Generation of infective library

```
all.samples <- readRDS("data/allSamplesDataTable.RDS")

all.samples$Group[all.samples$Group == "mRNA_3cpc_HEK293T"] <- "mRNA_3cpc_HEK293T"
all.samples$Group[all.samples$Group == "mRNA_30cpc_HEK293T"] <- "mRNA_30cpc_HEK293T"
```

## Plotting function

```
# Select samples =====

topSampleOne <- "mRNA_3cpc_Th"
topSampleTwo <- "mRNA_3cpc_Ctx"
topSampleThree <- "mRNA_3cpc_SN"
bottomSampleOne <- "mRNA_30cpc_Th"
bottomSampleTwo <- "mRNA_30cpc_Ctx"
bottomSampleThree <- "mRNA_30cpc_SN"
filterBC <- FALSE
filterAnimal <- FALSE
AnimaladjustPlot <- FALSE
NormalizePlot <- TRUE
size.bin <- 1
winWidth = 1
PlotBC = TRUE

fill.values <- eval(parse(text = paste("c(", topSampleOne, "= rgb(93,52,27, maxColorValue = 255), ",
  topSampleTwo, "= rgb(155,98,60, maxColorValue = 255), ", topSampleThree,
  "= rgb(213,168,132, maxColorValue = 255), ", bottomSampleOne, "= rgb(38,64,135, maxColorValue = 255),",
  bottomSampleTwo, "= rgb(75,132,165, maxColorValue = 255),", bottomSampleThree,
  "= rgb(164,189,216, maxColorValue = 255))", sep = "")))
setkey(all.samples, Group)
select.samples <- all.samples[J(names(fill.values))] #Select the six compared groups
select.samples[, `:=`(RNAcount, log2(RNAcount + 1))]

setorder(select.samples, Group, GeneName, start, width)

windowTable <- select.samples[, c("GeneName", "start", "width"), with = FALSE]
windowTable <- unique(windowTable, by = c("GeneName", "start", "width"))
windowTable <- windowTable[, (seq(start, start + width - winWidth)), by = c("GeneName",
  "start", "width")]
setnames(windowTable, "V1", "winStart")
windowTable[, `:=`(winEnd, winStart + winWidth - 1)]
```

```

setkeyv(windowTable, c("GeneName", "start", "width"))
setkeyv(select.samples, c("GeneName", "start", "width"))
select.samples.windowBin <- select.samples[windowTable, allow.cartesian = TRUE]

setkeyv(select.samples.windowBin, c("Group", "GeneName", "winStart", "winEnd"))
select.samples.windowBin <- select.samples.windowBin[, list(Overlaps = .N, BC = paste(t(BC),
collapse = ","), Animals = paste(t(Animals), collapse = ","), LUTnrs = paste(t(LUTnrs),
collapse = ","), RNAccount = sum(RNAccount)), by = c("Group", "GeneName",
"winStart", "winEnd", "seqlength")]

plot.data.dt <- unique(select.samples.windowBin, by = c("Group", "GeneName",
"winStart", "winEnd"))

# ===== Binning of data =====
FullLength <- max(plot.data.dt$winStart)
position <- seq(0, FullLength, size.bin)
plot.data.dt[, `:=`(bin, findInterval(winStart, position))]

plot.data.bin <- plot.data.dt[, list(.N, seqlength = min(seqlength), BCsum = length(table(strsplit(paste(t(
collapse = ","), ", "))), AA = position[findInterval(mean(winStart), position)],
AnimalCount = length(table(strsplit(paste(t(Animals), collapse = ","), ", "))),
LUTnrs = paste(unique(names(table(strsplit(paste(t(LUTnrs), collapse = ","),
", "))), collapse = ","), NormCount = sum(RNAccount)), by = c("Group",
"GeneName", "bin")]
plot.data.bin <- unique(plot.data.bin, by = c("Group", "GeneName", "bin"))

plot.data.bin[, `:=`(BCanim, as.double(BCsum + AnimalCount))]

# ===== Filtration parameters =====

if (NormalizePlot) {
  for (this.name in names(fill.values)) {
    plot.data.bin[plot.data.bin$Group == this.name]$NormCount <- plot.data.bin[plot.data.bin$Group ==
this.name]$NormCount/max(plot.data.bin[plot.data.bin$Group == this.name]$NormCount)
  }
}

if (PlotBC && NormalizePlot) {
  for (this.name in names(fill.values)) {
    plot.data.bin[plot.data.bin$Group == this.name]$BCanim <- plot.data.bin[plot.data.bin$Group ==
this.name]$BCanim/max(plot.data.bin[plot.data.bin$Group == this.name]$BCanim)
  }
}

for (this.name in names(fill.values)[seq((length(fill.values)/2) + 1, length(fill.values))]) {
  plot.data.bin[plot.data.bin$Group == this.name]$NormCount <- plot.data.bin[plot.data.bin$Group ==
this.name]$NormCount * -1 #This line flips the values for the second half of the groups
  plot.data.bin[plot.data.bin$Group == this.name]$BCanim <- plot.data.bin[plot.data.bin$Group ==
this.name]$BCanim * -1
}

# ===== Output plot =====

if (PlotBC) {
  outVar <- "BCanim"
}

```

```

} else {
  outVar <- "NormCount"
}

plot.out <- eval(parse(text = paste("ggplot(plot.data.bin,aes(x=AA,y=", outVar,
  ", fill = Group))", sep = "")))
plot.out <- plot.out + geom_bar(stat = "identity", position = "identity") +
  theme_bw() + scale_fill_manual(name = "Library", values = fill.values) +
  scale_colour_manual(name = "Library", values = fill.values) + scale_x_continuous(breaks = c(seq(0,
  3000, 100)), expand = c(0, 0)) + theme(plot.margin = unit(x = c(0, 0, 0,
  0), units = "mm"), legend.position = "bottom", legend.spacing = unit(0,
  "cm"), legend.key.height = unit(0, "cm"), plot.background = element_rect(fill = "white"),
  axis.text = element_text(size = rel(0.45)), axis.ticks = element_line(size = rel(0.5)),
  axis.ticks.length = unit(0.05, "cm"), strip.text.x = element_text(size = rel(0.5),
  colour = "black", angle = 0, lineheight = 0.1, vjust = 0.1), strip.background = element_blank(),
  panel.spacing.y = unit(-0.15, "cm"), panel.spacing.x = unit(0, "cm"))

facet_multiple(plot = plot.out, facets = "GeneName", ncol = 1, nrow = 25)

```

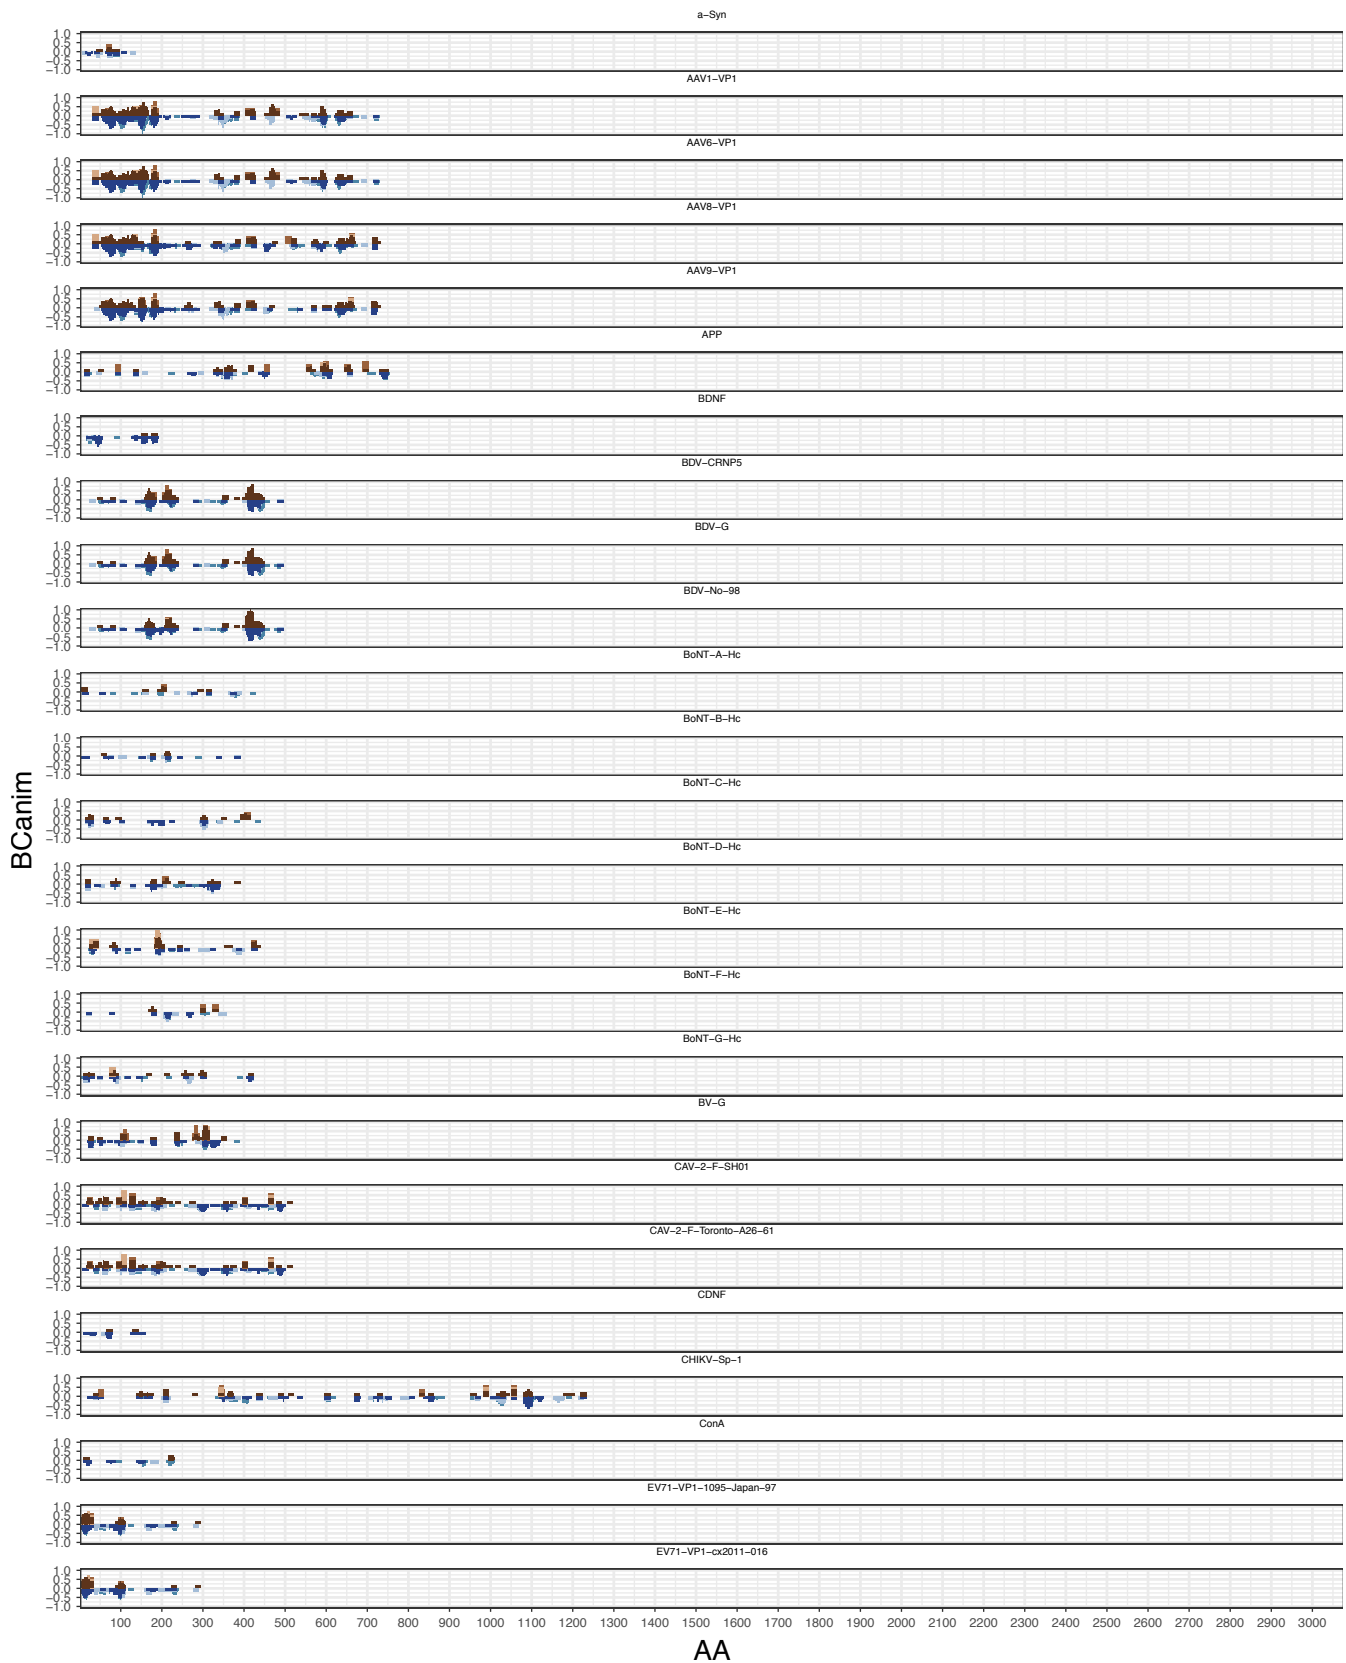

Library  mRNA\_30cpc\_Ctx  mRNA\_30cpc\_Th  mRNA\_3cpc\_SN  mRNA\_30cpc\_SN  mRNA\_3cpc\_Ctx  mRNA\_3cpc\_Th

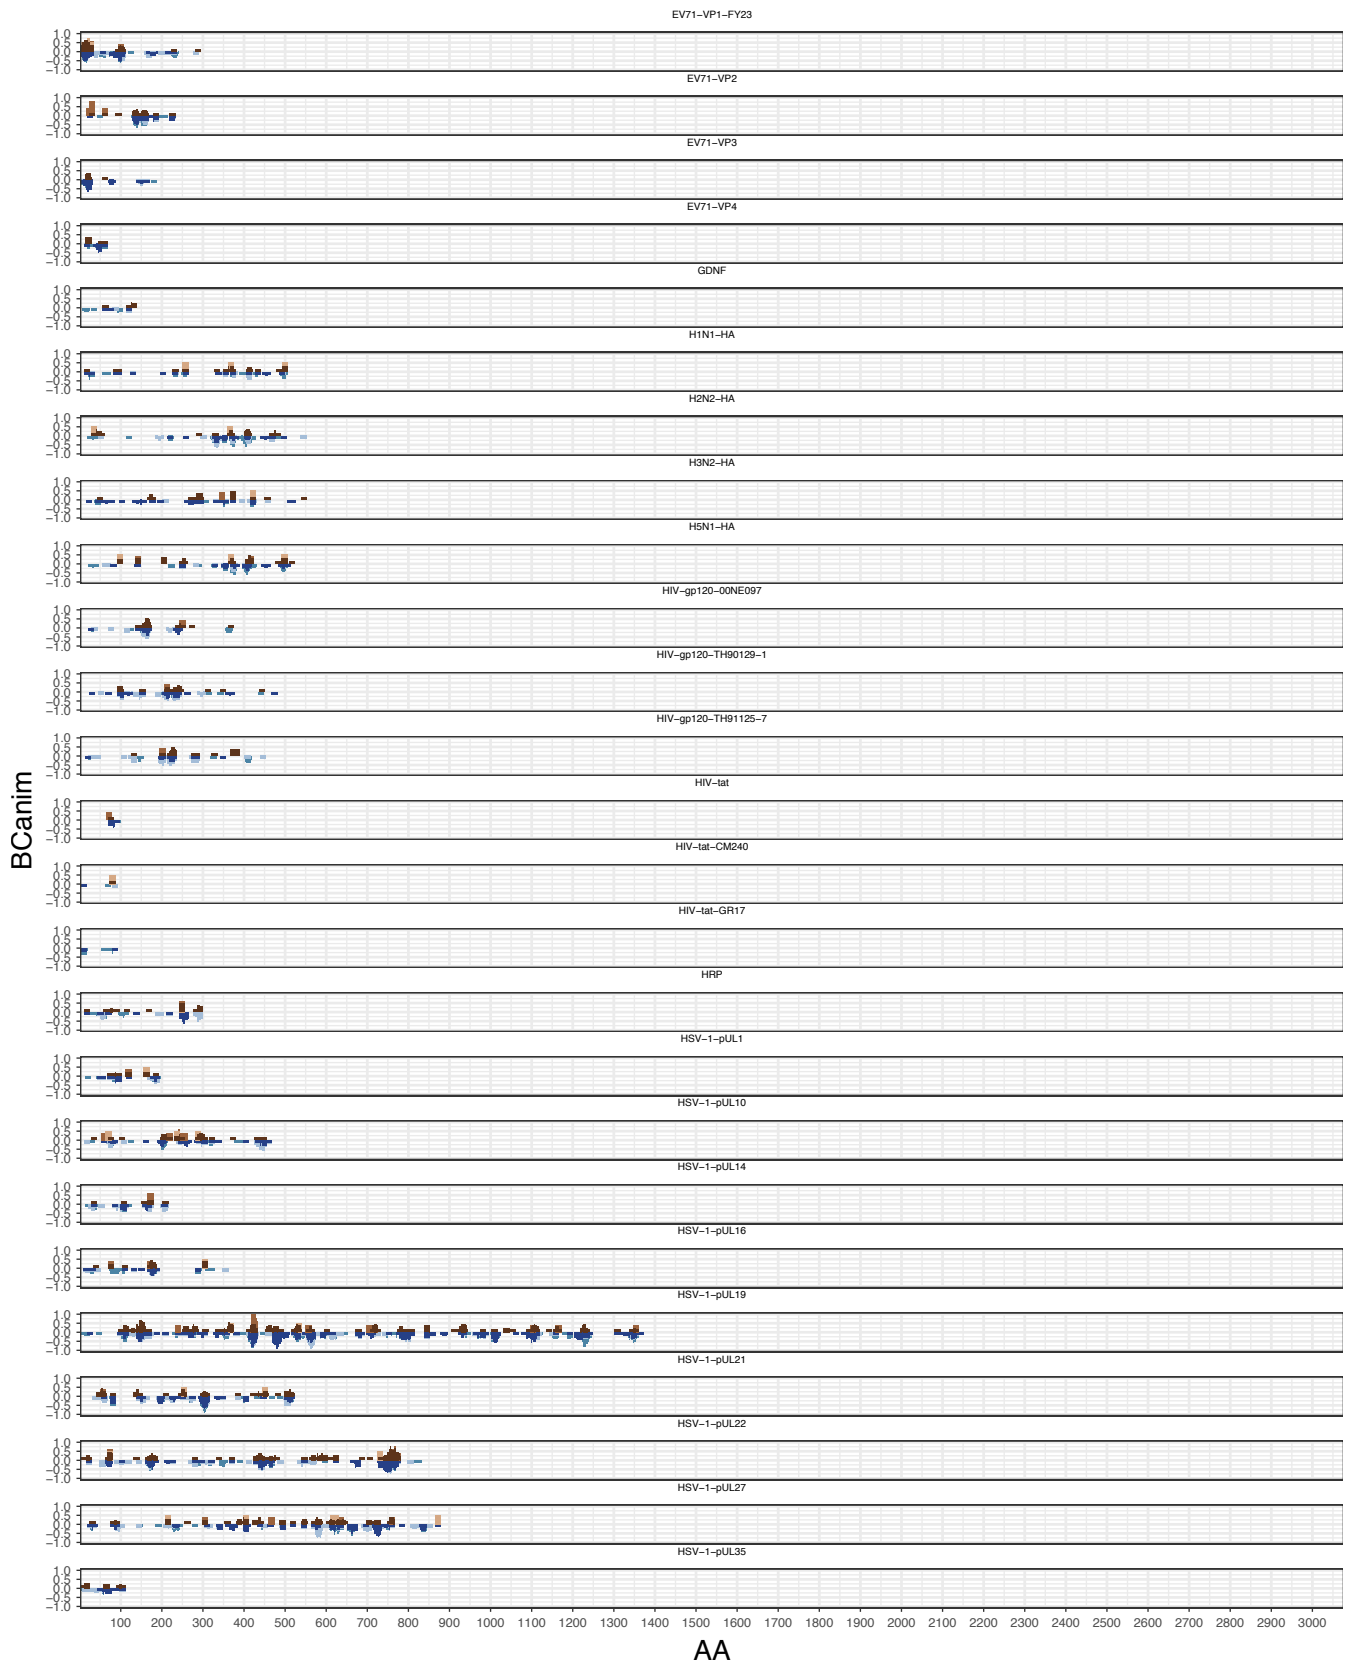

Library ■ mRNA\_30cpc\_Ctx ■ mRNA\_30cpc\_Th ■ mRNA\_3cpc\_SN  
■ mRNA\_30cpc\_SN ■ mRNA\_3cpc\_Ctx ■ mRNA\_3cpc\_Th

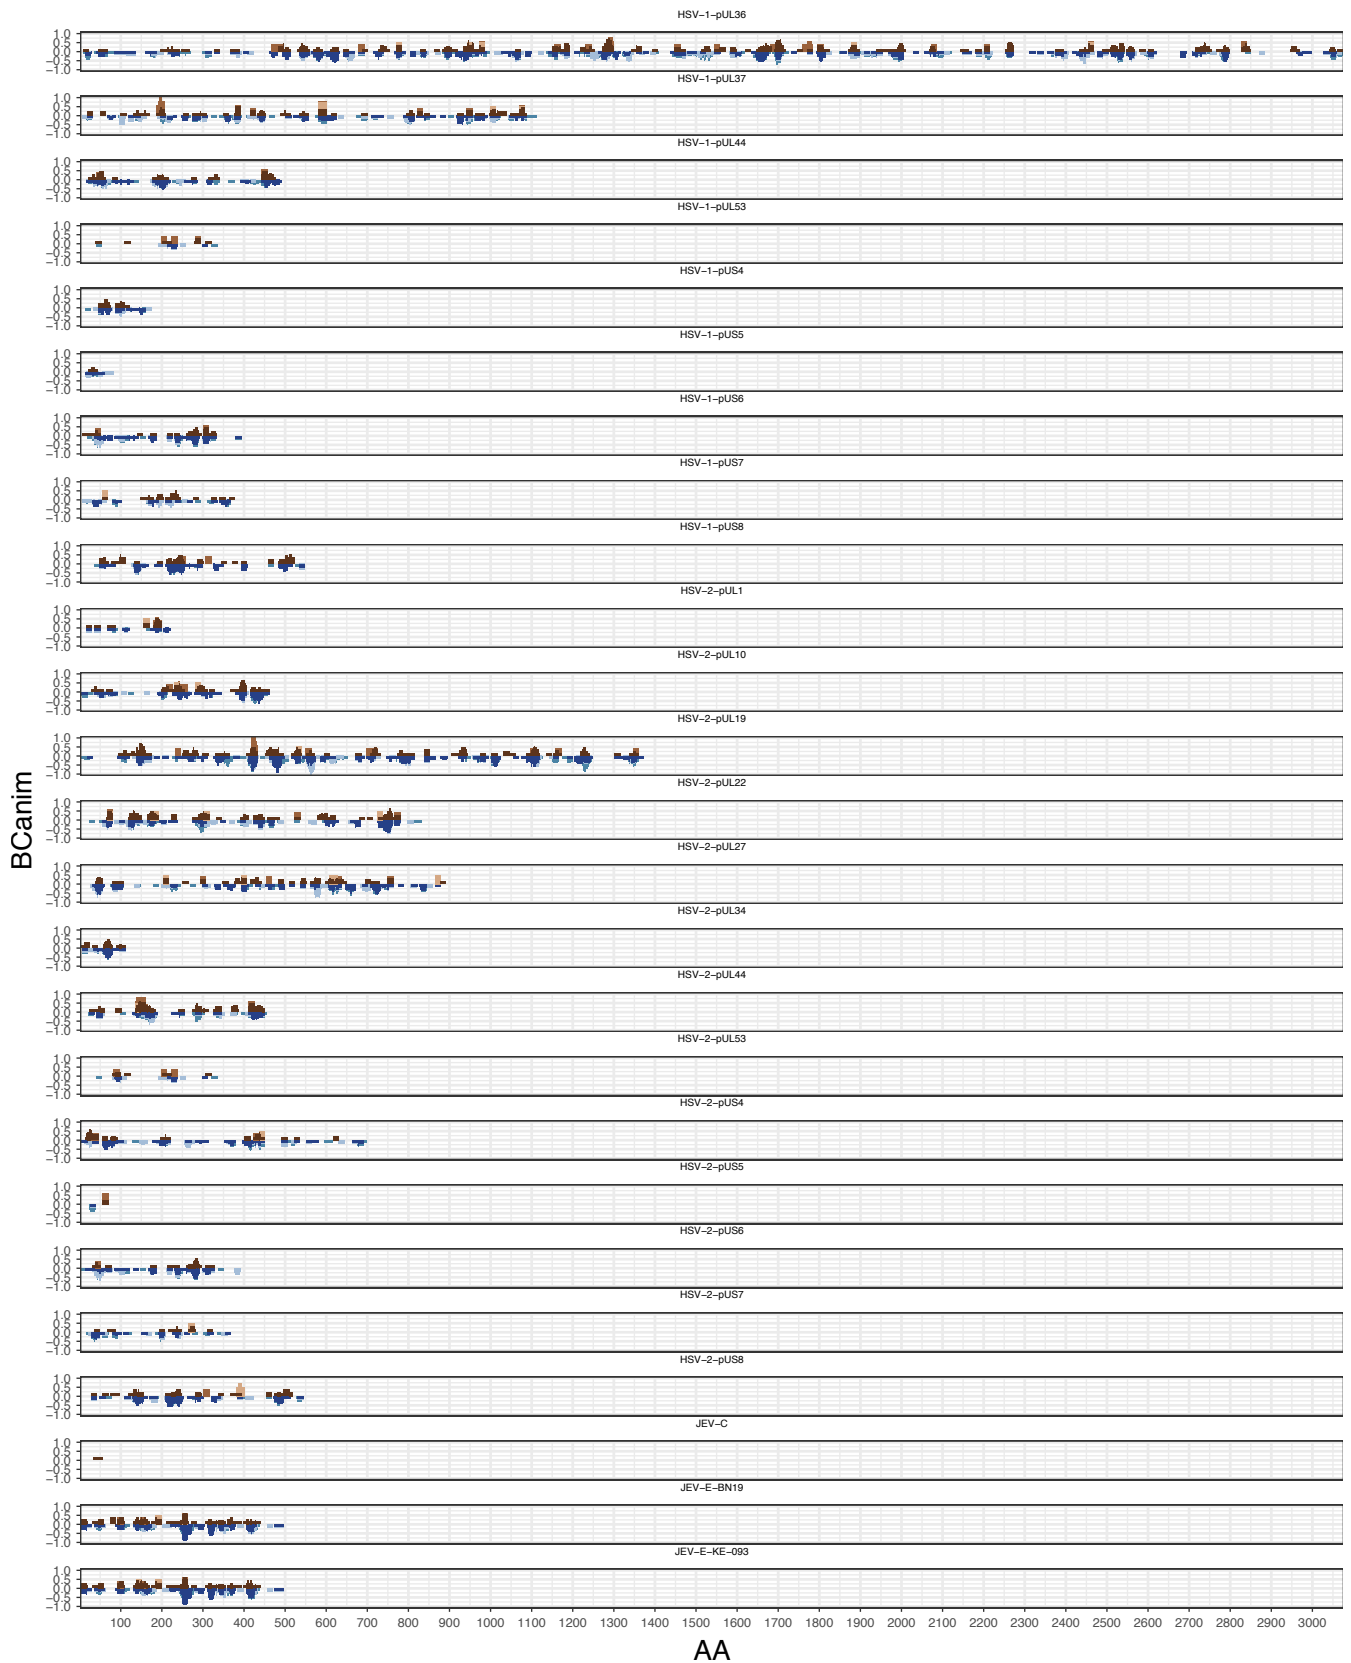

Library ■ mRNA\_30cpc\_Ctx ■ mRNA\_30cpc\_Th ■ mRNA\_3cpc\_SN  
■ mRNA\_30cpc\_SN ■ mRNA\_3cpc\_Ctx ■ mRNA\_3cpc\_Th

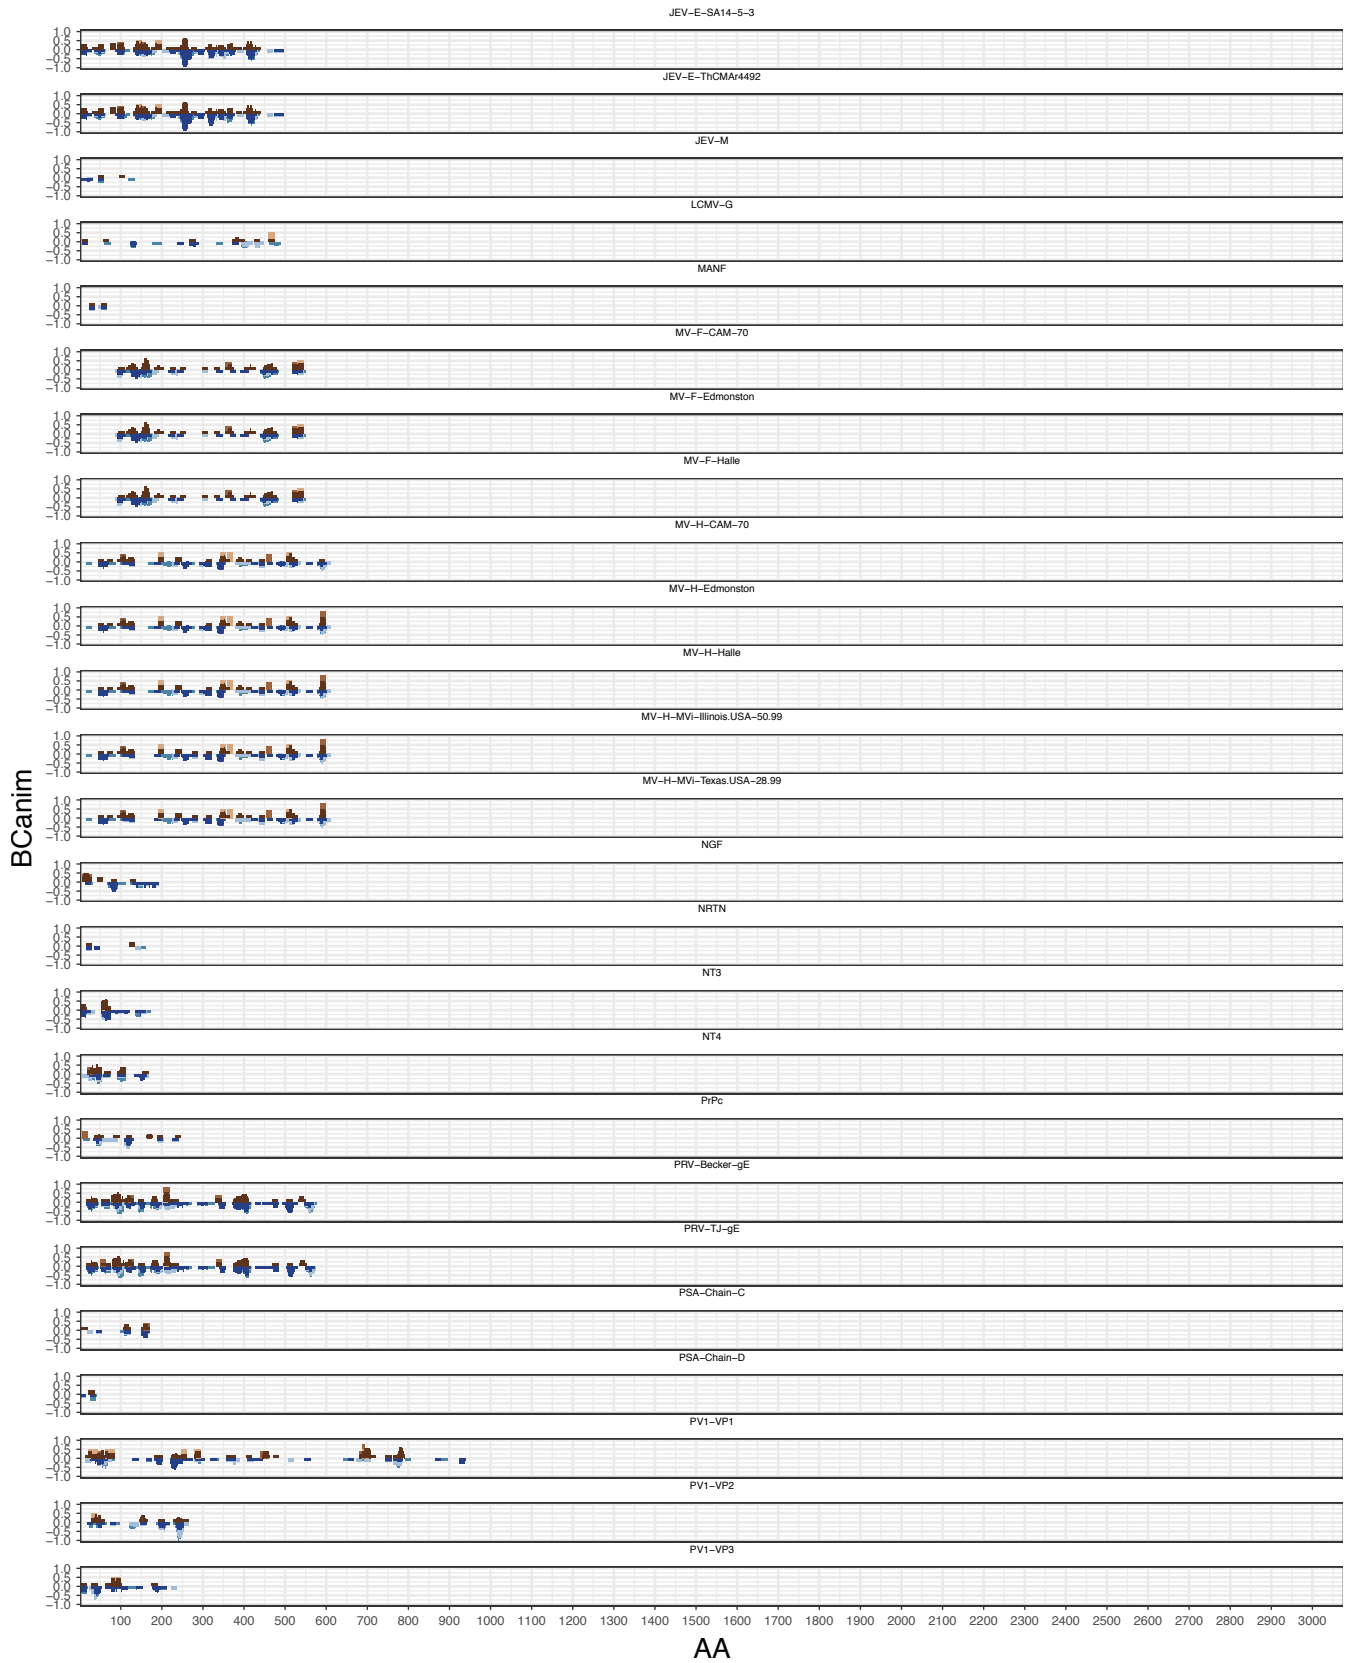

Library ■ mRNA\_30cpc\_Ctx ■ mRNA\_30cpc\_Th ■ mRNA\_3cpc\_SN  
■ mRNA\_30cpc\_SN ■ mRNA\_3cpc\_Ctx ■ mRNA\_3cpc\_Th

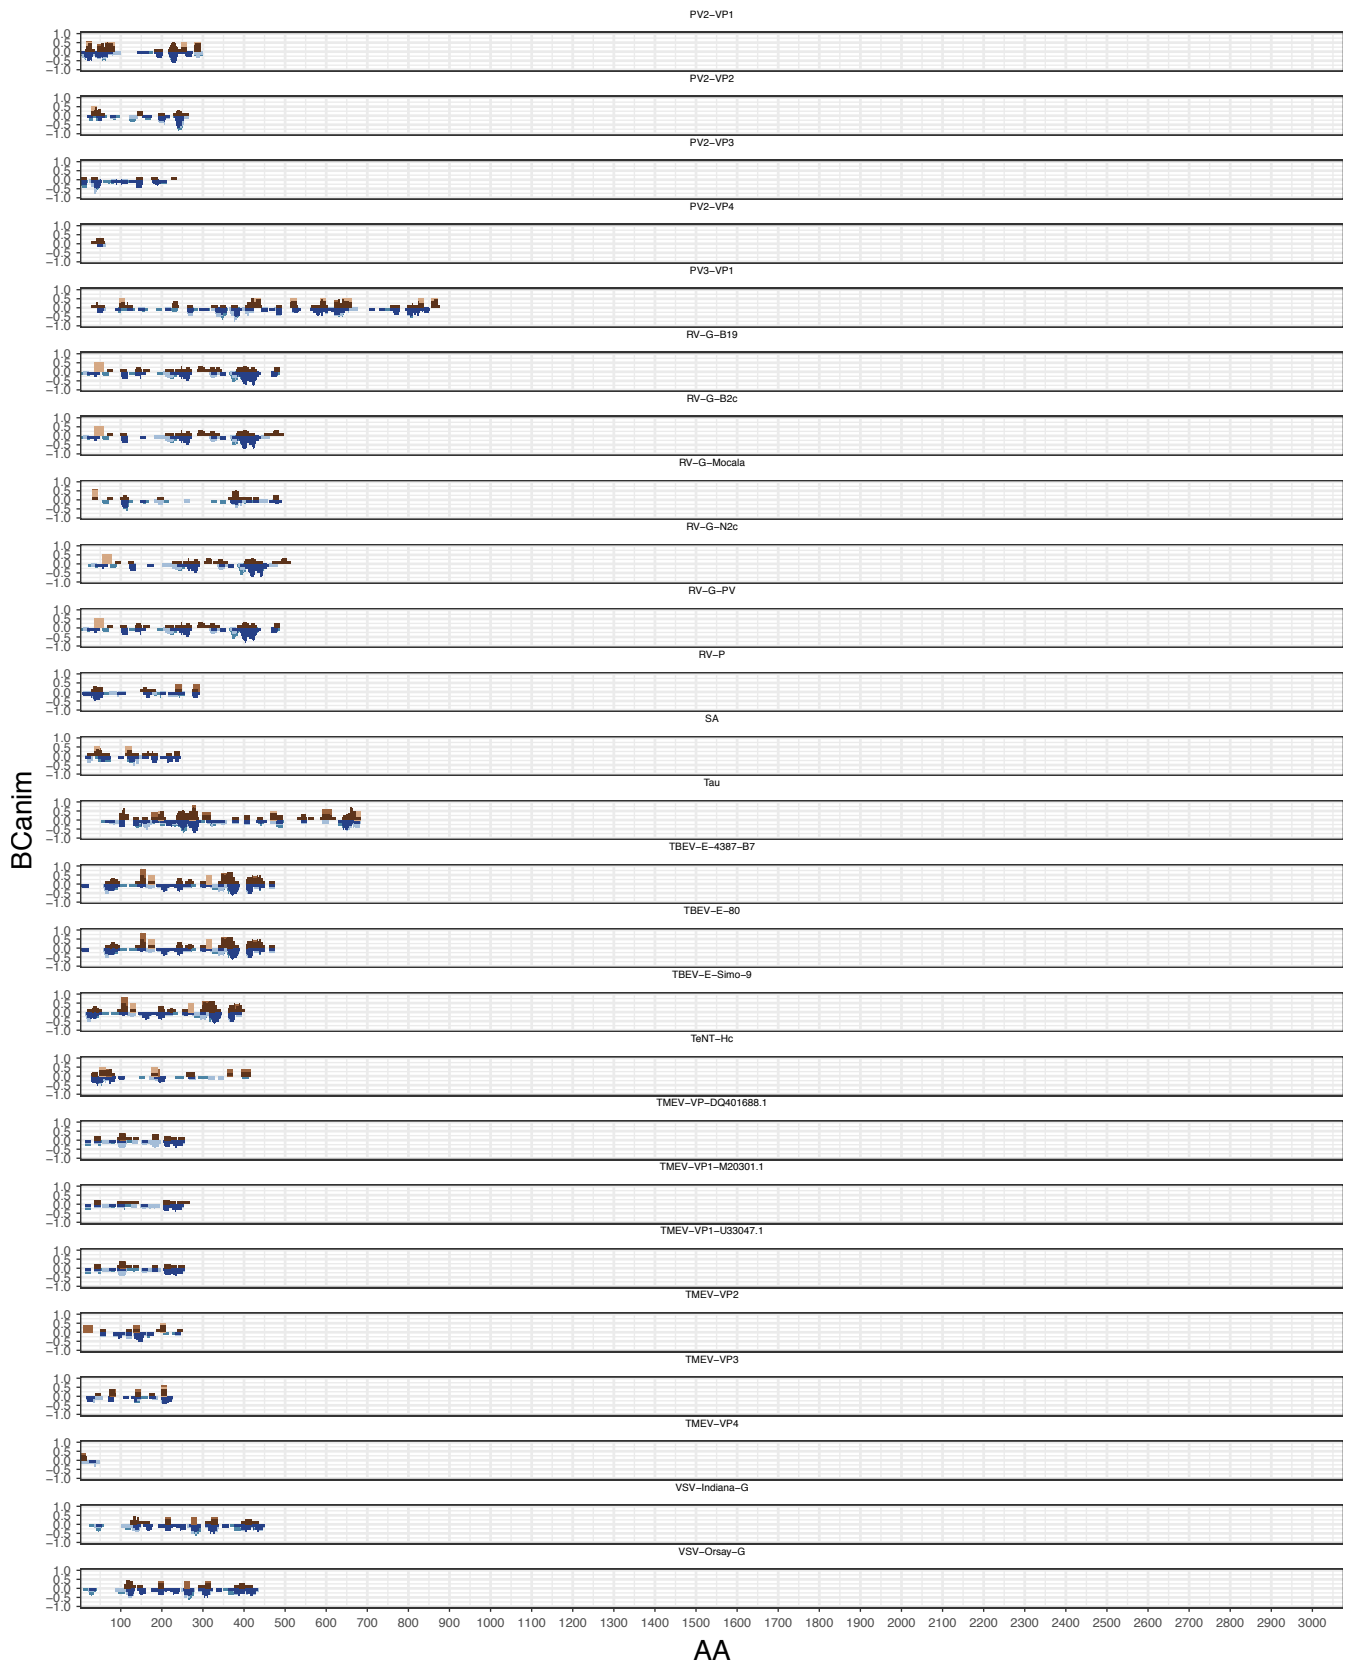

Library ■ mRNA\_30cpc\_Ctx ■ mRNA\_30cpc\_Th ■ mRNA\_30cpc\_SN  
■ mRNA\_30cpc\_SN ■ mRNA\_30cpc\_Ctx ■ mRNA\_30cpc\_Th



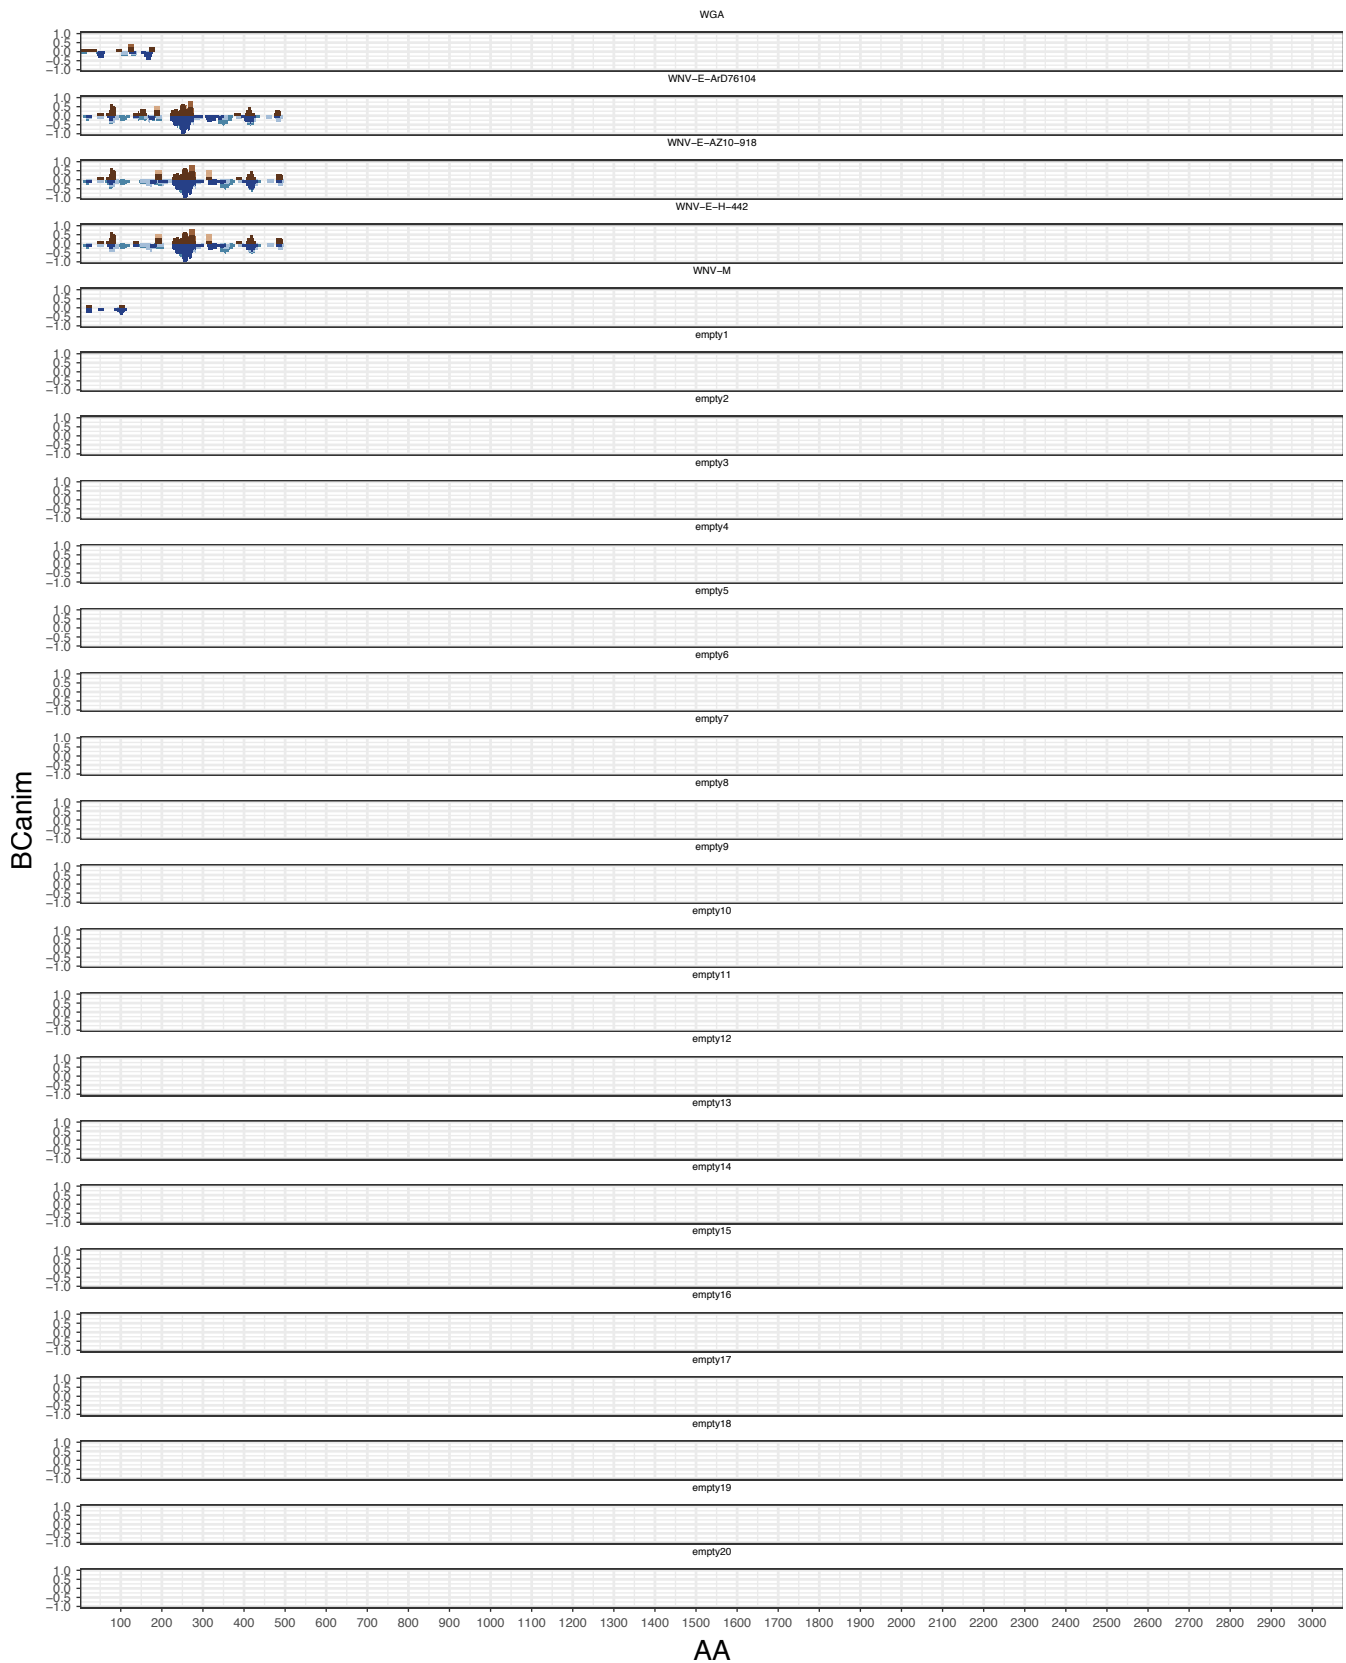

Library mRNA\_30cpc\_Ctx mRNA\_30cpc\_Th mRNA\_3cpc\_SN mRNA\_3cpc\_Th

```
devtools::session_info()
```

```
Session info -----
```

```
setting  value
version  R version 3.4.2 (2017-09-28)
system   x86_64, linux-gnu
ui       X11
language (EN)
collate  en_US.UTF-8
tz       UTC
date     2017-11-01
```

```
Packages -----
```

| package           | * version  | date       |
|-------------------|------------|------------|
| acepack           | 1.4.1      | 2016-10-29 |
| AnnotationDbi     | 1.38.2     | 2017-10-13 |
| AnnotationFilter  | 1.0.0      | 2017-10-13 |
| AnnotationHub     | 2.8.2      | 2017-10-13 |
| backports         | 1.1.1      | 2017-09-25 |
| base              | * 3.4.2    | 2017-10-06 |
| base64enc         | 0.1-3      | 2015-07-28 |
| Biobase           | * 2.36.2   | 2017-10-13 |
| BiocGenerics      | * 0.22.1   | 2017-10-13 |
| BiocInstaller     | 1.26.1     | 2017-10-10 |
| BiocParallel      | 1.10.1     | 2017-10-13 |
| biomaRt           | 2.32.1     | 2017-10-13 |
| Biostrings        | * 2.44.2   | 2017-10-13 |
| biovizBase        | 1.24.0     | 2017-10-13 |
| bit               | 1.1-12     | 2014-04-09 |
| bit64             | 0.9-7      | 2017-05-08 |
| bitops            | 1.0-6      | 2013-08-17 |
| blob              | 1.1.0      | 2017-06-17 |
| BSgenome          | 1.44.2     | 2017-10-13 |
| checkmate         | 1.8.4      | 2017-09-25 |
| cluster           | 2.0.6      | 2017-03-16 |
| codetools         | 0.2-15     | 2016-10-05 |
| colorspace        | 1.3-2      | 2016-12-14 |
| compiler          | 3.4.2      | 2017-10-06 |
| curl              | 2.8.1      | 2017-07-21 |
| data.table        | * 1.10.4-2 | 2017-10-12 |
| datasets          | * 3.4.2    | 2017-10-06 |
| DBI               | 0.7        | 2017-06-18 |
| DelayedArray      | * 0.2.7    | 2017-10-13 |
| devtools          | * 1.13.3   | 2017-08-02 |
| dichromat         | 2.0-0      | 2013-01-24 |
| digest            | 0.6.12     | 2017-01-27 |
| doParallel        | * 1.0.11   | 2017-09-28 |
| ensemblDb         | 2.0.4      | 2017-10-13 |
| evaluate          | 0.10.1     | 2017-06-24 |
| foreach           | * 1.4.3    | 2015-10-13 |
| foreign           | 0.8-69     | 2017-06-21 |
| formatR           | 1.5        | 2017-04-25 |
| Formula           | 1.2-2      | 2017-07-10 |
| GenomeInfoDb      | * 1.12.3   | 2017-10-13 |
| GenomeInfoDbData  | 0.99.0     | 2017-10-13 |
| GenomicAlignments | * 1.12.2   | 2017-10-13 |
| GenomicFeatures   | 1.28.5     | 2017-10-13 |

|                        |          |            |
|------------------------|----------|------------|
| GenomicRanges          | * 1.28.6 | 2017-10-13 |
| GGally                 | 1.3.2    | 2017-08-02 |
| ggbio                  | * 1.24.1 | 2017-10-13 |
| ggplot2                | * 2.2.1  | 2016-12-30 |
| ggplus                 | * 0.1    | 2017-10-13 |
| graph                  | 1.54.0   | 2017-10-13 |
| graphics               | * 3.4.2  | 2017-10-06 |
| grDevices              | * 3.4.2  | 2017-10-06 |
| grid                   | * 3.4.2  | 2017-10-06 |
| gridExtra              | 2.3      | 2017-09-09 |
| gtable                 | 0.2.0    | 2016-02-26 |
| Hmisc                  | 4.0-3    | 2017-05-02 |
| hms                    | 0.3      | 2016-11-22 |
| htmlTable              | 1.9      | 2017-01-26 |
| htmltools              | 0.3.6    | 2017-04-28 |
| htmlwidgets            | 0.9      | 2017-07-10 |
| httpuv                 | 1.3.5    | 2017-07-04 |
| httr                   | 1.3.1    | 2017-08-20 |
| interactiveDisplayBase | 1.14.0   | 2017-10-13 |
| IRanges                | * 2.10.5 | 2017-10-13 |
| iterators              | * 1.0.8  | 2015-10-13 |
| kableExtra             | * 0.5.2  | 2017-09-15 |
| knitr                  | * 1.17   | 2017-08-10 |
| labeling               | 0.3      | 2014-08-23 |
| lattice                | 0.20-35  | 2017-03-25 |
| latticeExtra           | 0.6-28   | 2016-02-09 |
| lazyeval               | 0.2.0    | 2016-06-12 |
| magrittr               | 1.5      | 2014-11-22 |
| Matrix                 | 1.2-11   | 2017-08-16 |
| matrixStats            | * 0.52.2 | 2017-04-14 |
| memoise                | 1.1.0    | 2017-04-21 |
| methods                | * 3.4.2  | 2017-10-06 |
| mime                   | 0.5      | 2016-07-07 |
| munsell                | 0.4.3    | 2016-02-13 |
| nnet                   | 7.3-12   | 2016-02-02 |
| OrganismDbi            | 1.18.1   | 2017-10-13 |
| parallel               | * 3.4.2  | 2017-10-06 |
| plyr                   | * 1.8.4  | 2016-06-08 |
| ProtGenerics           | 1.8.0    | 2017-10-13 |
| R6                     | 2.2.2    | 2017-06-17 |
| RBGL                   | 1.52.0   | 2017-10-13 |
| RColorBrewer           | 1.1-2    | 2014-12-07 |
| Rcpp                   | 0.12.13  | 2017-09-28 |
| RCurl                  | 1.95-4.8 | 2016-03-01 |
| readr                  | 1.1.1    | 2017-05-16 |
| reshape                | 0.8.7    | 2017-08-06 |
| reshape2               | 1.4.2    | 2016-10-22 |
| rlang                  | 0.1.2    | 2017-08-09 |
| rmarkdown              | 1.6      | 2017-06-15 |
| rpart                  | 4.1-11   | 2017-04-21 |
| rprojroot              | 1.2      | 2017-01-16 |
| Rsamtools              | * 1.28.0 | 2017-10-13 |
| RSQLite                | 2.0      | 2017-06-19 |
| rtracklayer            | 1.36.6   | 2017-10-13 |
| rvest                  | 0.3.2    | 2016-06-17 |
| S4Vectors              | * 0.14.7 | 2017-10-13 |
| scales                 | 0.5.0    | 2017-08-24 |

|                      |          |            |
|----------------------|----------|------------|
| shiny                | 1.0.5    | 2017-08-23 |
| splines              | 3.4.2    | 2017-10-06 |
| stats                | * 3.4.2  | 2017-10-06 |
| stats4               | * 3.4.2  | 2017-10-06 |
| stringi              | 1.1.5    | 2017-04-07 |
| stringr              | 1.2.0    | 2017-02-18 |
| SummarizedExperiment | * 1.6.5  | 2017-10-13 |
| survival             | 2.41-3   | 2017-04-04 |
| tibble               | 1.3.4    | 2017-08-22 |
| tools                | 3.4.2    | 2017-10-06 |
| utils                | * 3.4.2  | 2017-10-06 |
| VariantAnnotation    | 1.22.3   | 2017-10-13 |
| withr                | 2.0.0    | 2017-07-28 |
| XML                  | 3.98-1.9 | 2017-06-19 |
| xml2                 | 1.1.1    | 2017-01-24 |
| xtable               | 1.8-2    | 2016-02-05 |
| XVector              | * 0.16.0 | 2017-10-13 |
| yaml                 | 2.1.14   | 2016-11-12 |
| zlibbioc             | 1.22.0   | 2017-10-13 |

source  
CRAN (R 3.4.2)  
Bioconductor  
Bioconductor  
Bioconductor  
CRAN (R 3.4.2)  
local  
CRAN (R 3.4.2)  
Bioconductor  
Bioconductor  
Bioconductor  
Bioconductor  
Bioconductor  
Bioconductor  
CRAN (R 3.4.2)  
CRAN (R 3.4.2)  
CRAN (R 3.4.2)  
CRAN (R 3.4.2)  
Bioconductor  
CRAN (R 3.4.2)  
CRAN (R 3.4.2)  
CRAN (R 3.4.2)  
CRAN (R 3.4.2)  
local  
CRAN (R 3.4.2)  
CRAN (R 3.4.2)  
local  
CRAN (R 3.4.2)  
Bioconductor  
CRAN (R 3.4.2)  
CRAN (R 3.4.2)  
CRAN (R 3.4.2)  
CRAN (R 3.4.2)  
Bioconductor  
CRAN (R 3.4.2)  
CRAN (R 3.4.2)  
CRAN (R 3.4.2)

CRAN (R 3.4.2)  
CRAN (R 3.4.2)  
Bioconductor  
Bioconductor  
Bioconductor  
Bioconductor  
Bioconductor  
CRAN (R 3.4.2)  
Bioconductor  
CRAN (R 3.4.2)  
Github (guiastrennec/ggplus@10ca057)  
Bioconductor  
local  
local  
local  
CRAN (R 3.4.2)  
Bioconductor  
Bioconductor  
CRAN (R 3.4.2)  
local  
CRAN (R 3.4.2)  
CRAN (R 3.4.2)  
CRAN (R 3.4.2)  
Bioconductor  
local  
CRAN (R 3.4.2)  
Bioconductor  
CRAN (R 3.4.2)  
Bioconductor  
CRAN (R 3.4.2)  
CRAN (R 3.4.2)

Bioconductor  
CRAN (R 3.4.2)  
Bioconductor  
CRAN (R 3.4.2)  
Bioconductor  
CRAN (R 3.4.2)  
CRAN (R 3.4.2)  
local  
local  
local  
CRAN (R 3.4.2)  
CRAN (R 3.4.2)  
Bioconductor  
CRAN (R 3.4.2)  
CRAN (R 3.4.2)  
local  
local  
Bioconductor  
CRAN (R 3.4.2)  
CRAN (R 3.4.2)  
CRAN (R 3.4.2)  
CRAN (R 3.4.2)  
Bioconductor  
CRAN (R 3.4.2)  
Bioconductor

# Clustering Polypeptide motifs using the Hammock hidden Markov model peptide clustering

*Tomas Bjorklund*

*Wed Nov 8 10:50:14 2017*

This script clusters Polypeptide motifs using the Hammock hidden Markov model peptide clustering.

```
suppressPackageStartupMessages(library(knitr))
```

## Loading samples

```
all.samples <- readRDS("data/allSamplesDataTable.RDS")
all.samples[, `:=`(Peptide, as.character(Peptide)), ]

setkey(all.samples, Group)

select.samples <- all.samples[J(c("mRNA_30cpc_SN", "mRNA_30cpc_Th", "mRNA_30cpc_Ctx",
  "mRNA_30cpc_SN", "mRNA_30cpc_Th", "mRNA_30cpc_Ctx", "mRNA_30cpc_SN_4wks", "mRNA_30cpc_Th_4wks",
  "mRNA_30cpc_Ctx_4wks", "mRNA_30cpc_SN_4wks", "mRNA_30cpc_Th_4wks", "mRNA_30cpc_Ctx_4wks"))]

select.samples[, `:=`(BCcount, as.integer(mclapply(BC, function(x) length(table(strsplit(paste(t(x),
  collapse = ","), ","))), mc.cores = detectCores())))]
select.samples[, `:=`(Animalcount, as.integer(mclapply(Animals, function(x) length(table(strsplit(paste(t(x),
  collapse = ","), ","))), mc.cores = detectCores())))]
select.samples[, `:=`(Score, BCcount + Animalcount - 1), ]
select.samples.trsp <- unique(select.samples, by = c("Animals", "BC", "LUTnrs"))

fasta.names <- paste(1:nrow(select.samples.trsp), select.samples.trsp$Score,
  select.samples.trsp$Group, sep = "|")
write.fasta(as.list(select.samples.trsp$Peptide), fasta.names, "data/trspSamplesPeptides.fasta",
  open = "w", nbchar = 60, as.string = TRUE)

# Generate Scoring table for Weblogo Weighting
select.samples.pepMerge <- select.samples.trsp[, sum(Score), by = c("Peptide")]
setnames(select.samples.pepMerge, "V1", "Score")
```

## Executing Hammock Clustering

```
Sys.setenv(PATH = paste("/root/HMMER/binaries", Sys.getenv("PATH"), sep = ":"),
  HHLIB = "/home/rstudio/Hammock_v_1.1.1/hhsuite-2.0.16/lib/hh/")
unlink("/home/rstudio/data/Hammock", recursive = TRUE, force = FALSE)
sys.out <- system(paste("java -jar /home/rstudio/Hammock_v_1.1.1/dist/Hammock.jar full -i /home/rstudio/data/
  detectCores(), sep = ""), intern = TRUE, ignore.stdout = TRUE)
# Alternative parameters --use_clinkage --alignment_threshold 23 --max_shift
# 13 --max_aln_length 37 --count_threshold 50 --max_inner_gaps 0
# --assign_thresholds 14.1,10.5,7.0
hammock.log <- data.table(readLines("data/Hammock/run.log"))

colnames(hammock.log) <- c("Hammock log file")
knitr::kable(hammock.log, longtable = T)
```

---

Hammock log file

---

2017-11-08 10:50:21.165:

Hammock version 1.1.1 Run with `-help` for a brief description of command line parameters.

2017-11-08 10:50:21.264: Program started in mode "full".

Command-line arguments:

full -i /home/rstudio/data/trspSamplesPeptides.fasta -d /home/rstudio/data/Hammock -max\_shift 7 -c 65 -t 32

Complete list of input/output parameters:

-i, -input /home/rstudio/data/trspSamplesPeptides.fasta  
-d, -output\_directory /home/rstudio/data/Hammock  
-t, -thread 32  
-l, -labels null

Complete list of linkage clustering parameters:

-f, -file\_format fasta  
-m, -matrix /home/rstudio/Hammock\_v\_1.1.1/matrices/blosum62.txt  
-g, -alignment\_threshold (-greedy\_threshold)null  
-x, -max\_shift 7  
-p, -gap\_penalty 0  
-C, -cache\_size\_limit 1

2017-11-08 10:50:21.265: Loading input sequences...

2017-11-08 10:50:21.304: 4143 unique sequences loaded.

2017-11-08 10:50:21.308: 9028 total sequences loaded.

2017-11-08 10:50:21.308: 4143 unique sequences after non-specified labels filtered out

2017-11-08 10:50:21.313: 9028 total sequences after non-specified labels filtered out

2017-11-08 10:50:21.314: Shortest sequence: 14 AA. Longest sequence: 22 AA.

2017-11-08 10:50:21.314: Up to 10 000 unique sequences. Using linkage clustering. Use `-use_greedy` to force greedy clustering

2017-11-08 10:50:21.321: Generating input statistics...

2017-11-08 10:50:21.331: Linkage clustering threshold not set. Setting automatically to: 26

2017-11-08 10:50:21.333: Linkage clustering...

2017-11-08 10:50:40.209: Ready. Clustering time: 18876

2017-11-08 10:50:40.209: Resulting clusters: 1668

2017-11-08 10:50:40.210: Building MSAs...

2017-11-08 10:50:40.688: Ready. Total time: 19355

2017-11-08 10:50:40.688: Saving results to output files...

2017-11-08 10:50:40.907: Linkage clustering results in: /home/rstudio/data/Hammock/initial\_clusters.tsv

2017-11-08 10:50:40.907: and: /home/rstudio/data/Hammock/initial\_clusters\_sequences.tsv

2017-11-08 10:50:40.908: and: /home/rstudio/data/Hammock/initial\_clusters\_sequences\_original\_order.tsv

2017-11-08 10:50:40.908:

Loading clusters...

2017-11-08 10:50:40.931: Maximal alignment length not set. Setting automatically to: 30

2017-11-08 10:50:40.931: Minimal number of match states not set. Setting automatically to: 5

2017-11-08 10:50:40.964: Assign threshold sequence not set. Setting automatically to:

2017-11-08 10:50:40.966: 14.43,11.39,8.36,

2017-11-08 10:50:40.966: Overlap threshold not set. Setting automatically to:

2017-11-08 10:50:40.967: 10.63,6.08,0.0,

2017-11-08 10:50:40.967: Merge threshold not set. Setting automatically based on average sequence length to:

2017-11-08 10:50:40.968: 15.19,13.67,12.15,

Complete list of HMM-based clustering parameters:

-a, -part\_threshold null



---

Hammock log file

---

-s, -size\_threshold null  
-c, -count\_threshold 65  
-n, -assign\_thresholds 14.43,11.39,8.36,  
-v, -overlap\_thresholds 10.63,6.08,0.0,  
-r, -merge\_thresholds 15.19,13.67,12.15,  
-e, -relative\_thresholds false  
-b, -absolute\_thresholds true  
-h, -min\_conserved\_positions 5  
-y, -max\_gap\_proportion 0.05  
-k, -min\_ic 1.2  
-j, -max\_aln\_length 30  
-u, -max\_inner\_gaps 0  
-q, -extension\_increase\_length false

2017-11-08 10:50:40.991:

Clustering in 3 rounds. . .

2017-11-08 10:50:40.992:

2017-11-08 10:50:40.992: Round 1:

2017-11-08 10:50:40.993: 65 clusters remaining

2017-11-08 10:50:40.993: Building hmms and searching database. . .

2017-11-08 10:50:41.427: Extending clusters. . .

2017-11-08 10:50:41.431: 52 sequences to be inserted into clusters

2017-11-08 10:50:41.431: 27 clusters to be extended

2017-11-08 10:50:41.452: 35 sequences rejected

2017-11-08 10:50:41.453: 1 cluster pairs to check and merge.

2017-11-08 10:50:41.453: Merging clusters from 1 groups. . .

2017-11-08 10:50:41.460: Buiding hhs. . .

2017-11-08 10:50:41.469: HH clustering. . .

2017-11-08 10:50:41.658:

2017-11-08 10:50:41.658: Round 2:

2017-11-08 10:50:41.658: 65 clusters remaining

2017-11-08 10:50:41.658: Building hmms and searching database. . .

2017-11-08 10:50:42.040: Extending clusters. . .

2017-11-08 10:50:42.044: 73 sequences to be inserted into clusters

2017-11-08 10:50:42.044: 34 clusters to be extended

2017-11-08 10:50:42.074: 58 sequences rejected

2017-11-08 10:50:42.075: 90 cluster pairs to check and merge.

2017-11-08 10:50:42.075: Merging clusters from 4 groups. . .

2017-11-08 10:50:42.082: Buiding hhs. . .

2017-11-08 10:50:42.119: HH clustering. . .

2017-11-08 10:50:43.158:

2017-11-08 10:50:43.158: Round 3:

2017-11-08 10:50:43.159: 64 clusters remaining

2017-11-08 10:50:43.159: Building hmms and searching database. . .

2017-11-08 10:50:43.520: Extending clusters. . .

2017-11-08 10:50:43.523: 208 sequences to be inserted into clusters

2017-11-08 10:50:43.523: 52 clusters to be extended

2017-11-08 10:50:43.631: 132 sequences rejected

2017-11-08 10:50:43.632: Overlap threshold is 0. Running full cluster merging.

2017-11-08 10:50:43.638: Buiding hhs. . .

2017-11-08 10:50:43.664: HH clustering. . .

2017-11-08 10:50:45.287:

Ready. Clustering time : 4296

---

Hammock log file

---

2017-11-08 10:50:45.287: Resulting clusers: 61  
2017-11-08 10:50:45.287: Containing 471 unique sequences and 1535 total sequences.  
2017-11-08 10:50:45.290: Unique sequences not assigned: 3672, total sequences not assigned: 7493  
2017-11-08 10:50:45.291: Saving results to outupt files...  
2017-11-08 10:50:45.340: Results in: /home/rstudio/data/Hammock/final\_clusters\_sequences.tsv  
2017-11-08 10:50:45.341: and: /home/rstudio/data/Hammock/final\_clusters.tsv  
2017-11-08 10:50:45.341: and: /home/rstudio/data/Hammock/final\_clusters\_sequences\_original\_order.tsv  
2017-11-08 10:50:45.341:  
Calculating KLD...  
2017-11-08 10:50:45.426: Final system KLD over match state MSA positions: 13.360165786988897  
2017-11-08 10:50:45.426: Final system KLD over all MSA positions: 19.27055070815488  
2017-11-08 10:50:45.426: Program successfully ended.

---

## Generation of Weblogo visualization

```
ham.clusters <- data.table(read.table("/home/rstudio/data/Hammock/final_clusters.tsv",
  header = TRUE, skip = 0, sep = "\t", stringsAsFactors = FALSE, fill = TRUE))
id.order <- as.list(ham.clusters$cluster_id)
ham.clusters.all <- data.table(read.table("/home/rstudio/data/Hammock/final_clusters_sequences.tsv",
  header = TRUE, skip = 0, sep = "\t", stringsAsFactors = FALSE, fill = TRUE))
ham.clusters.all[, `:=`(alignment, gsub("\\-", "\\_", alignment))]
setkey(select.samples, Peptide)
setkey(select.samples.trsp, Peptide)

unlink("/home/rstudio/data/WEBlogos", recursive = TRUE, force = FALSE)
dir.create(file.path("/home/rstudio/data/", "WEBlogos"), showWarnings = FALSE)
dir.create(file.path("/home/rstudio/data/Hammock/", "alignments_final_Scored"),
  showWarnings = FALSE)

setkey(ham.clusters.all, cluster_id)
setkey(ham.clusters, cluster_id)
setkey(select.samples.pepMerge, Peptide)

opts_chunk$set(out.width = "100%", fig.align = "center")
generateWeblogo <- function(in.name) {
  # in.name <- ham.clusters$cluster_id[2] in.name <- 6777
  this.fa <- read.fasta(file = paste("/home/rstudio/data/Hammock/alignments_final/",
    in.name, ".aln", sep = ""))
  allSeqs <- unlist(getSequence(this.fa, as.string = TRUE))
  allSeqs <- data.table(unlist(lapply(allSeqs, function(x) gsub("[^-]", "",
    toupper(x)))))
  allSeqs.out <- select.samples.pepMerge[J(allSeqs)]
  allSeqs.out$Annot <- data.table(getName(this.fa))
  allSeqs.out[, `:=`(Annot, paste(Annot, "_", Score, sep = ""))]
  allSeqs.out$Alignment <- data.table(toupper(unlist(getSequence(this.fa,
    as.string = TRUE))))

  allSeqs.out <- allSeqs.out[rep(1:.N, Score)][, `:=`(Indx, 1:.N), by = Peptide]
  allSeqs.out[, `:=`(Annot, paste(Annot, "_", Indx, sep = ""))]

  write.fasta(as.list(allSeqs.out$Alignment), allSeqs.out$Annot, nbchar = 60,
    paste("/home/rstudio/data/Hammock/alignments_final_Scored/", in.name,
      ".aln", sep = ""), open = "w")
}
```

```

this.main <- ham.clusters[J(in.name)]
main.gene <- select.samples.trsp[J(this.main$main_sequence)]$GeneName[1]
this.title <- paste("## Peptide", this.main$main_sequence, "from", main.gene,
  "with cluster number", in.name, sep = " ")

tmp <- system(paste("weblago --format PDF --sequence-type protein --size large --errorbars NO --resolution",
  this.title, "' < /home/rstudio/data/Hamcock/alignments_final_Scored/",
  in.name, ".aln > /home/rstudio/data/WEBlogos/", in.name, ".pdf", sep = ""),
  intern = TRUE, ignore.stdout = FALSE)

cat("\n")
cat(this.title, "\n")
cat("\n")
cat("\n")
cat(paste0("![Peptide: ", this.main$main_sequence, " from ", main.gene,
  " with cluster number ", in.name, "](/home/rstudio/data/WEBlogos/",
  in.name, ".pdf)")
cat("\n")
out.table <- knitr::kable(this.main[, c(1:8, 10)], format = "latex")
print(column_spec(out.table, 1:9, monospace = TRUE) %>% kable_styling(latex_options = c("striped",
  "scale_down", "repeat_header")))
cat("\n")
this.cluster <- ham.clusters.all[J(in.name)]
out.table <- knitr::kable(this.cluster[, c(1:7)], format = "latex")
print(column_spec(out.table, 1:7, monospace = TRUE) %>% kable_styling(latex_options = c("striped",
  "scale_down", "repeat_header")))

this.found <- select.samples[J(this.cluster$sequence)]
setnames(this.cluster, "sequence", "Peptide")
this.found <- merge(this.found, this.cluster[, 2:3], by = "Peptide", all = FALSE)
cat("\n")
cat("\n")
output.order <- c("alignment", "LUTnrs", "GeneName", "start", "structure",
  "Group", "Score")
if (nrow(this.found) >= 48) {
  this.found.p1 <- this.found[1:47, ]
  out.table <- knitr::kable(this.found.p1[, ..output.order], format = "latex")
  print(column_spec(out.table, 1, monospace = TRUE) %>% kable_styling(latex_options = c("striped",
    "repeat_header")))
  cat("\n")
  cat("\n\n\\pagebreak\n")
  cat("\n\n\\clearpage\n")
  this.found <- this.found[48:nrow(this.found), ]
  if (nrow(this.found) >= 48) {
    this.found.p2 <- this.found[1:47, ]
    out.table <- knitr::kable(this.found.p2[, ..output.order], format = "latex")
    print(column_spec(out.table, 1, monospace = TRUE) %>% kable_styling(latex_options = c("striped",
      "repeat_header")))
    cat("\n")
    cat("\n\n\\pagebreak\n")
    cat("\n\n\\clearpage\n")
    this.found <- this.found[48:nrow(this.found), ]
  }
}
if (nrow(this.found) >= 48) {
  this.found.p2 <- this.found[1:47, ]
  out.table <- knitr::kable(this.found.p2[, ..output.order], format = "latex")
  print(column_spec(out.table, 1, monospace = TRUE) %>% kable_styling(latex_options = c("striped",

```

```
# setkey(select.samples.trsp,Peptide) select.samples.trsp.select <-  
# select.samples.trsp[J(c('PPDELNLTTASLPL'))]
```

```
print("Total analysis time:")
```

```
[1] "Total analysis time:"
```

```
print(Sys.time() - strt1)
```

```
Time difference of 1.221091 mins
```

```
devtools::session_info()
```

```
Session info -----
```

```
setting value  
version R version 3.4.2 (2017-09-28)  
system x86_64, linux-gnu  
ui X11  
language (EN)  
collate en_US.UTF-8  
tz UTC  
date 2017-11-08
```

```
Packages -----
```

| package    | * version  | date       | source         |
|------------|------------|------------|----------------|
| ade4       | 1.7-8      | 2017-08-09 | CRAN (R 3.4.2) |
| backports  | 1.1.1      | 2017-09-25 | CRAN (R 3.4.2) |
| base       | * 3.4.2    | 2017-10-06 | local          |
| compiler   | 3.4.2      | 2017-10-06 | local          |
| data.table | * 1.10.4-2 | 2017-10-12 | CRAN (R 3.4.2) |
| datasets   | * 3.4.2    | 2017-10-06 | local          |
| devtools   | * 1.13.3   | 2017-08-02 | CRAN (R 3.4.2) |
| digest     | 0.6.12     | 2017-01-27 | CRAN (R 3.4.2) |
| evaluate   | 0.10.1     | 2017-06-24 | CRAN (R 3.4.2) |
| formatR    | 1.5        | 2017-04-25 | CRAN (R 3.4.2) |
| graphics   | * 3.4.2    | 2017-10-06 | local          |
| grDevices  | * 3.4.2    | 2017-10-06 | local          |
| highr      | 0.6        | 2016-05-09 | CRAN (R 3.4.2) |
| hms        | 0.3        | 2016-11-22 | CRAN (R 3.4.2) |
| htmltools  | 0.3.6      | 2017-04-28 | CRAN (R 3.4.2) |
| httr       | 1.3.1      | 2017-08-20 | CRAN (R 3.4.2) |
| kableExtra | * 0.5.2    | 2017-09-15 | CRAN (R 3.4.2) |
| knitr      | * 1.17     | 2017-08-10 | CRAN (R 3.4.2) |
| magrittr   | 1.5        | 2014-11-22 | CRAN (R 3.4.2) |
| memoise    | 1.1.0      | 2017-04-21 | CRAN (R 3.4.2) |
| methods    | 3.4.2      | 2017-10-06 | local          |
| parallel   | * 3.4.2    | 2017-10-06 | local          |
| plyr       | 1.8.4      | 2016-06-08 | CRAN (R 3.4.2) |
| R6         | 2.2.2      | 2017-06-17 | CRAN (R 3.4.2) |
| Rcpp       | 0.12.13    | 2017-09-28 | CRAN (R 3.4.2) |
| readr      | 1.1.1      | 2017-05-16 | CRAN (R 3.4.2) |
| reshape2   | * 1.4.2    | 2016-10-22 | CRAN (R 3.4.2) |
| rlang      | 0.1.2      | 2017-08-09 | CRAN (R 3.4.2) |
| rmarkdown  | 1.6        | 2017-06-15 | CRAN (R 3.4.2) |
| rprojroot  | 1.2        | 2017-01-16 | CRAN (R 3.4.2) |
| rvest      | 0.3.2      | 2016-06-17 | CRAN (R 3.4.2) |
| seqinr     | * 3.4-5    | 2017-08-01 | CRAN (R 3.4.2) |

|         |         |            |                |
|---------|---------|------------|----------------|
| stats   | * 3.4.2 | 2017-10-06 | local          |
| stringi | 1.1.5   | 2017-04-07 | CRAN (R 3.4.2) |
| stringr | 1.2.0   | 2017-02-18 | CRAN (R 3.4.2) |
| tibble  | 1.3.4   | 2017-08-22 | CRAN (R 3.4.2) |
| tools   | 3.4.2   | 2017-10-06 | local          |
| utils   | * 3.4.2 | 2017-10-06 | local          |
| withr   | 2.0.0   | 2017-07-28 | CRAN (R 3.4.2) |
| xml2    | 1.1.1   | 2017-01-24 | CRAN (R 3.4.2) |
| yaml    | 2.1.14  | 2016-11-12 | CRAN (R 3.4.2) |

# Clustering Polypeptide motifs using the Hammock hidden Markov model peptide clustering

Tomas Bjorklund

Wed Nov 8 14:46:45 2017

This script clusters Polypeptide motifs using the Hammock hidden Markov model peptide clustering.

```
suppressPackageStartupMessages(library(knitr))
```

## Loading samples

```
all.samples <- readRDS("data/allSamplesDataTable.RDS")
all.samples[, `:=`(Peptide, as.character(Peptide)), ]

setkey(all.samples, Group)

select.samples <- all.samples[J(c("mRNA_30cpc_SN", "mRNA_30cpc_Th", "mRNA_30cpc_Ctx",
  "mRNA_30cpc_SN", "mRNA_30cpc_Th", "mRNA_30cpc_Ctx", "mRNA_30cpc_SN_4wks", "mRNA_30cpc_Th_4wks",
  "mRNA_30cpc_Ctx_4wks", "mRNA_30cpc_SN_4wks", "mRNA_30cpc_Th_4wks", "mRNA_30cpc_Ctx_4wks"))]

select.samples[, `:=`(BCcount, as.integer(mclapply(BC, function(x) length(table(strsplit(paste(t(x),
  collapse = ","), ","))), mc.cores = detectCores())))]
select.samples[, `:=`(Animalcount, as.integer(mclapply(Animals, function(x) length(table(strsplit(paste(t(x),
  collapse = ","), ","))), mc.cores = detectCores())))]
select.samples[, `:=`(Score, BCcount + Animalcount - 1), ]
select.samples.trsp <- unique(select.samples, by = c("Animals", "BC", "LUTnrs"))
setkey(select.samples.trsp, Sequence)

selected.peptides <- data.table(read.table("input/selectedPeptides.txt", header = TRUE,
  skip = 0, sep = "\t", stringsAsFactors = FALSE, fill = TRUE))
# Removed the first 2 serotypes selected for in vitro properties
selected.peptides <- selected.peptides[3:25, ]
select.samples.main <- select.samples.trsp[J(selected.peptides$Sequence)]

select.samples.main[, `:=`(Group, as.character(lapply(Group, function(x) gsub("(_4wks)",
  "", x))))]
select.samples.main <- select.samples.main[, sum(Score), by = c("Sequence",
  "Group", "Peptide")]
setnames(select.samples.main, "V1", "Score")
select.samples.main <- merge(selected.peptides, select.samples.main, by = "Sequence",
  all = FALSE)
select.samples.main[, `:=`(Peptide, as.character(Peptide))]

out.table <- data.table(dcast(select.samples.main, Name + Peptide ~ Group, fun = sum,
  value.var = "Score"))

out.table[, `:=`(alignment, paste("-----", Peptide, "-----",
  sep = ""))]
out.table <- transform(out.table, sum = rowSums(out.table[, 3:8]))
# reorder for output
out.table <- out.table[, c(1, 2, 9, 10, 3:8)]
setnames(out.table, c("Name", "Peptide"), c("cluster_id", "sequence"))
write.table(out.table, file = "data/selectedPeptides.tsv", quote = FALSE, sep = "\t",
```

```

row.names = FALSE)

# Generate Scoring table for Weblogo Weighting
select.samples.pepMerge <- select.samples.trsp[, sum(Score), by = c("Peptide")]
setnames(select.samples.pepMerge, "V1", "Score")

# removing the selected peptides from all sequences to allow for clustering
select.samples.trsp <- select.samples.trsp[!(select.samples.trsp$Peptide %in%
  out.table$sequence), ]

fasta.names <- paste(1:nrow(select.samples.trsp), select.samples.trsp$Score,
  select.samples.trsp$Group, sep = "|")
write.fasta(as.list(select.samples.trsp$Peptide), fasta.names, "data/trspSamplesPeptidesNonSelect.fasta",
  open = "w", nbchar = 60, as.string = TRUE)

```

## Executing Hammock Clustering

```

Sys.setenv(PATH = paste("/root/HMMER/binaries", Sys.getenv("PATH"), sep = ":"),
  HHLIB = "/home/rstudio/Hammock_v_1.1.1/hhsuite-2.0.16/lib/hh/")
unlink("/home/rstudio/data/HammockSelected", recursive = TRUE, force = FALSE)
sys.out <- system(paste("java -jar /home/rstudio/Hammock_v_1.1.1/dist/Hammock.jar cluster -i /home/rstudio/data/
  detectCores(), sep = ""), intern = TRUE, ignore.stdout = TRUE)
# Alternative parameters --use_clinkage --alignment_threshold 23 --max_shift
# 13 --max_aln_length 42 --count_threshold 50 --max_inner_gaps 0
# --assign_thresholds 14.1,10.5,7.0
hammock.log <- data.table(readLines("data/HammockSelected/run.log"))

colnames(hammock.log) <- c("Hammock log file")
knitr::kable(hammock.log, longtable = T)

```

---

Hammock log file

---

2017-11-08 14:46:53.943:

Hammock version 1.1.1 Run with `-help` for a brief description of command line parameters.

2017-11-08 14:46:54.082: Program started in mode "cluster".

Command-line arguments:

`cluster -i /home/rstudio/data/selectedPeptides.tsv -as /home/rstudio/data/trspSamplesPeptidesNonSelect.fasta -d /home/rstudio/data/HammockSelected -max_shift 9 -assign_thresholds 15,12,10 -max_aln_length 42 -c 23 -t 32`

Complete list of input/output parameters:

- i, -input /home/rstudio/data/selectedPeptides.tsv
- d, -output\_directory /home/rstudio/data/HammockSelected
- t, -thread 32
- l, -labels null

2017-11-08 14:46:54.082:

Loading clusters...

2017-11-08 14:46:54.088: Loading additional sequences...

2017-11-08 14:46:54.128: Generating input statistics...

2017-11-08 14:46:54.131: Minimal number of match states not set. Setting automatically to: 5

2017-11-08 14:46:54.143: Overlap threshold not set. Setting automatically to:

2017-11-08 14:46:54.144: 10.04,5.74,0.0,

---

Hammock log file

---

2017-11-08 14:46:54.144: Merge threshold not set. Setting automatically based on average sequence length to:  
2017-11-08 14:46:54.145: 14.35,12.91,11.48,

Complete list of HMM-based clustering parameters:

-a, -part\_threshold null  
-s, -size\_threshold null  
-c, -count\_threshold 23  
-n, -assign\_thresholds 15.0,12.0,10.0,  
-v, -overlap\_thresholds 10.04,5.74,0.0,  
-r, -merge\_thresholds 14.35,12.91,11.48,  
-e, -relative\_thresholds false  
-b, -absolute\_thresholds true  
-h, -min\_conserved\_positions 5  
-y, -max\_gap\_proportion 0.05  
-k, -min\_ic 1.2  
-j, -max\_aln\_length 42  
-u, -max\_inner\_gaps 0  
-q, -extension\_increase\_length false

2017-11-08 14:46:54.157:  
Clustering in 3 rounds...

2017-11-08 14:46:54.159:  
2017-11-08 14:46:54.159: Round 1:

2017-11-08 14:46:54.160: 23 clusters remaining  
2017-11-08 14:46:54.160: Building hmms and searching database...  
2017-11-08 14:46:54.461: Extending clusters...  
2017-11-08 14:46:54.464: 90 sequences to be inserted into clusters  
2017-11-08 14:46:54.465: 23 clusters to be extended  
2017-11-08 14:46:54.506: 3 sequences rejected  
2017-11-08 14:46:54.508: 1 cluster pairs to check and merge.  
2017-11-08 14:46:54.508: Merging clusters from 1 groups...  
2017-11-08 14:46:54.511: Buiding hhs...  
2017-11-08 14:46:54.522: HH clustering...  
2017-11-08 14:46:54.743:  
2017-11-08 14:46:54.743: Round 2:

2017-11-08 14:46:54.743: 23 clusters remaining  
2017-11-08 14:46:54.743: Building hmms and searching database...  
2017-11-08 14:46:54.917: Extending clusters...  
2017-11-08 14:46:54.919: 17 sequences to be inserted into clusters  
2017-11-08 14:46:54.919: 9 clusters to be extended  
2017-11-08 14:46:54.929: 2 sequences rejected  
2017-11-08 14:46:54.930: 17 cluster pairs to check and merge.  
2017-11-08 14:46:54.930: Merging clusters from 2 groups...  
2017-11-08 14:46:54.934: Buiding hhs...  
2017-11-08 14:46:54.952: HH clustering...  
2017-11-08 14:46:55.205:  
2017-11-08 14:46:55.206: Round 3:

2017-11-08 14:46:55.206: 23 clusters remaining  
2017-11-08 14:46:55.206: Building hmms and searching database...  
2017-11-08 14:46:55.348: Extending clusters...  
2017-11-08 14:46:55.350: 20 sequences to be inserted into clusters  
2017-11-08 14:46:55.350: 10 clusters to be extended  
2017-11-08 14:46:55.359: 6 sequences rejected



---

## Hammock log file

---

```
2017-11-08 14:46:55.360: Overlap threshold is 0. Running full cluster merging.
2017-11-08 14:46:55.362: Buiding hhs...
2017-11-08 14:46:55.375: HH clustering...
2017-11-08 14:46:55.654:
Ready. Clustering time : 1496
2017-11-08 14:46:55.654: Resulting clusers: 23
2017-11-08 14:46:55.654: Containing 139 unique sequences and 537 total sequences.
2017-11-08 14:46:55.657: Unique sequences not assigned: 4004, total sequences not assigned: 8491
2017-11-08 14:46:55.657: Saving results to outupt files...
2017-11-08 14:46:55.682: Results in: /home/rstudio/data/HammockSelected/final_clusters_sequences.tsv
2017-11-08 14:46:55.682: and: /home/rstudio/data/HammockSelected/final_clusters.tsv
2017-11-08 14:46:55.682:
Calculating KLD...
2017-11-08 14:46:55.716: Final system KLD over match state MSA positions: 11.744046931714234
2017-11-08 14:46:55.716: Final system KLD over all MSA positions: 19.319796797087644
2017-11-08 14:46:55.716: Program successfully ended.
```

---

## Generation of Weblogo visualization

```
ham.clusters <- data.table(read.table("/home/rstudio/data/HammockSelected/final_clusters.tsv",
  header = TRUE, skip = 0, sep = "\t", stringsAsFactors = FALSE, fill = TRUE))
id.order <- as.list(ham.clusters$cluster_id)
ham.clusters.all <- data.table(read.table("/home/rstudio/data/HammockSelected/final_clusters_sequences.tsv",
  header = TRUE, skip = 0, sep = "\t", stringsAsFactors = FALSE, fill = TRUE))
ham.clusters.all[, `:=`(alignment, gsub("\\-", "\\_", alignment))]
setkey(select.samples, Peptide)
setkey(select.samples.trsp, Peptide)
setkey(select.samples.pepMerge, Peptide)

unlink("/home/rstudio/data/WEBlogosSelected", recursive = TRUE, force = FALSE)
dir.create(file.path("/home/rstudio/data/", "WEBlogosSelected"), showWarnings = FALSE)
dir.create(file.path("/home/rstudio/data/HammockSelected/", "alignments_final_Scored"),
  showWarnings = FALSE)

setkey(ham.clusters.all, cluster_id)
setkey(ham.clusters, cluster_id)

opts_chunk$set(out.width = "100%", fig.align = "center")
generateWeblogo <- function(in.name) {
  # in.name <- ham.clusters$cluster_id[2] in.name <- 6777

  this.fa <- read.fasta(file = paste("/home/rstudio/data/HammockSelected/alignments_final/",
    in.name, ".aln", sep = ""))
  allSeqs <- unlist(getSequence(this.fa, as.string = TRUE))
  allSeqs <- data.table(unlist(lapply(allSeqs, function(x) gsub("[(-]", "",
    toupper(x)))))
  allSeqs.out <- select.samples.pepMerge[J(allSeqs)]
  allSeqs.out$Annot <- data.table(getName(this.fa))
  allSeqs.out[, `:=`(Annot, paste(Annot, "_", Score, sep = ""))]
  allSeqs.out$Alignment <- data.table(toupper(unlist(getSequence(this.fa,
    as.string = TRUE))))
  align.all <- strsplit(allSeqs.out$Alignment, "[A-Z]")
  tail.length <- min(unlist(lapply(lapply(align.all, tail, n = 1L), nchar)))
```

```

head.length <- min(unlist(lapply(lapply(algn.all, head, n = 1L), nchar)))
total.length <- max(nchar(allSeqs.out$Alignment))
allSeqs.out[, `:=`(Alignment, lapply(Alignment, function(x) substr(x, head.length +
  1, total.length - tail.length)))]
allSeqs.out <- allSeqs.out[rep(1:.N, Score)][, `:=`(Indx, 1:.N), by = Peptide]
allSeqs.out[, `:=`(Annot, paste(Annot, "_", Indx, sep = ""))]

write.fasta(as.list(allSeqs.out$Alignment), allSeqs.out$Annot, nbchar = 60,
  paste("/home/rstudio/data/HammockSelected/alignments_final_Scored/",
    in.name, ".aln", sep = ""), open = "w")

this.main <- ham.clusters[J(in.name)]
main.gene <- select.samples[J(this.main$main_sequence)]$GeneName[1]
this.title <- paste("## Peptide ", this.main$main_sequence, " from ", main.gene,
  " used in serotype AAV-MNMO", in.name, sep = "")
tmp <- system(paste("weblog --format PDF --sequence-type protein --size large --stacks-per-line 48 --err
  this.title, " < /home/rstudio/data/HammockSelected/alignments_final_Scored/",
  in.name, ".aln > /home/rstudio/data/WEBlogosSelected/", in.name, ".pdf",
  sep = ""), intern = TRUE, ignore.stdout = FALSE)

cat("\n")
cat(this.title, "\n")
cat("\n")
cat("\n")
cat(paste0("![Peptide: ", this.main$main_sequence, " from ", main.gene,
  " with cluster number ", in.name, "](/home/rstudio/data/WEBlogosSelected/",
  in.name, ".pdf)")
cat("\n")
out.table <- knitr::kable(this.main[, c(1:9)], format = "latex")
print(column_spec(out.table, 1:9, monospace = TRUE) %>% kable_styling(latex_options = c("striped",
  "scale_down", "repeat_header")))
cat("\n")
this.cluster <- ham.clusters.all[J(in.name)]
algn.all <- strsplit(this.cluster$alignment, "[A-Z]")
tail.length <- min(unlist(lapply(lapply(algn.all, tail, n = 1L), nchar)))
head.length <- min(unlist(lapply(lapply(algn.all, head, n = 1L), nchar)))
total.length <- max(nchar(this.cluster$alignment))
this.cluster[, `:=`(alignment, lapply(alignment, function(x) substr(x, head.length +
  1, total.length - tail.length)))]

out.table <- knitr::kable(this.cluster[, c(1:7)], format = "latex")
print(column_spec(out.table, 1:7, monospace = TRUE) %>% kable_styling(latex_options = c("striped",
  "scale_down", "repeat_header")))

this.found <- select.samples[J(this.cluster$sequence)]
setnames(this.cluster, "sequence", "Peptide")
this.found <- merge(this.found, this.cluster[, 2:3], by = "Peptide", all = FALSE)
cat("\n")
cat("\n")
output.order <- c("alignment", "LUTnrs", "GeneName", "start", "structure",
  "Group", "Score")
if (nrow(this.found) >= 48) {
  this.found.p1 <- this.found[1:47, ]
  out.table <- knitr::kable(this.found.p1[, ..output.order], format = "latex")
  print(column_spec(out.table, 1, monospace = TRUE) %>% kable_styling(latex_options = c("striped",
    "repeat_header")))
  cat("\n")
  cat("\n\n\\pagebreak\n")
}

```

```

cat("\n\n\\clearpage\n")
this.found <- this.found[48:nrow(this.found), ]
if (nrow(this.found) >= 48) {
  this.found.p2 <- this.found[1:47, ]
  out.table <- knitr::kable(this.found.p2[, ..output.order], format = "latex")
  print(column_spec(out.table, 1, monospace = TRUE) %>% kable_styling(latex_options = c("striped",
    "repeat_header")))
  cat("\n")
  cat("\n\n\\pagebreak\n")
  cat("\n\n\\clearpage\n")
  this.found <- this.found[48:nrow(this.found), ]
}
if (nrow(this.found) >= 48) {
  this.found.p2 <- this.found[1:47, ]
  out.table <- knitr::kable(this.found.p2[, ..output.order], format = "latex")
  print(column_spec(out.table, 1, monospace = TRUE) %>% kable_styling(latex_options = c("striped",
    "repeat_header")))
  cat("\n")
  cat("\n\n\\pagebreak\n")
  cat("\n\n\\clearpage\n")
  this.found <- this.found[48:nrow(this.found), ]
}
out.table <- knitr::kable(this.found[, ..output.order], format = "latex")
print(column_spec(out.table, 1, monospace = TRUE) %>% kable_styling(latex_options = c("striped",
  "repeat_header")))
cat("\n")
cat("\n\n\\clearpage\n")
cat("\n")
} else {
  out.table <- knitr::kable(this.found[, ..output.order], format = "latex")
  print(column_spec(out.table, 1, monospace = TRUE) %>% kable_styling(latex_options = c("striped",
    "scale_down", "repeat_header")))
  cat("\n")
  cat("\n\n\\pagebreak\n")
  cat("\n\n\\clearpage\n")
}
}
invisible(lapply(id.order, generateWeblogo))

```

## Peptide VMSVLLVDTDATQQ from HSV-1-pUL22 used in serotype AAV-MNM04

## Peptide VMSVLLVDTDATQQ from HSV-1-pUL22 used in serotype AAV-MNM04

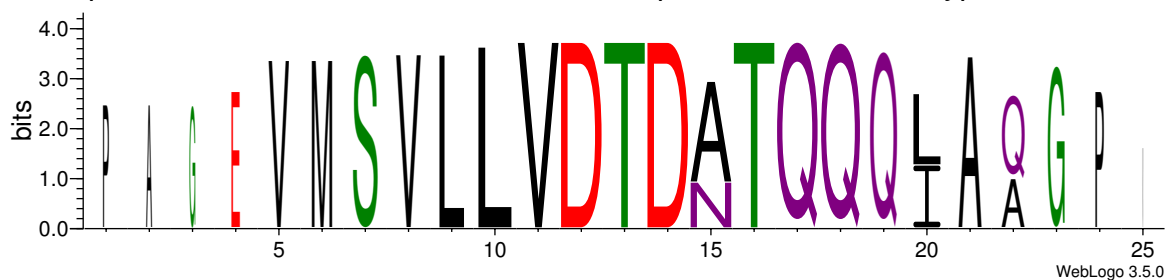

| cluster_id | main_sequence  | sum | mRNA_3cpc_Th | mRNA_30cpc_Ctx | mRNA_30cpc_Th | mRNA_30cpc_SN | mRNA_3cpc_Ctx | mRNA_3cpc_SN |
|------------|----------------|-----|--------------|----------------|---------------|---------------|---------------|--------------|
| 4          | VMSVLLVDTDATQQ | 48  | 6            | 14             | 14            | 11            | 0             | 0            |

```
# setkey(select.samples.trsp,Peptide) select.samples.trsp.select <-  
# select.samples.trsp[J(c('PPDELNLTTASLPL'))]
```

```
print("Total analysis time:")
```

```
[1] "Total analysis time:"
```

```
print(Sys.time() - strt1)
```

```
Time difference of 25.50499 secs
```

```
devtools::session_info()
```

```
Session info -----
```

```
setting value  
version R version 3.4.2 (2017-09-28)  
system x86_64, linux-gnu  
ui X11  
language (EN)  
collate en_US.UTF-8  
tz UTC  
date 2017-11-08
```

```
Packages -----
```

| package    | * version  | date       | source         |
|------------|------------|------------|----------------|
| ade4       | 1.7-8      | 2017-08-09 | CRAN (R 3.4.2) |
| backports  | 1.1.1      | 2017-09-25 | CRAN (R 3.4.2) |
| base       | * 3.4.2    | 2017-10-06 | local          |
| compiler   | 3.4.2      | 2017-10-06 | local          |
| data.table | * 1.10.4-2 | 2017-10-12 | CRAN (R 3.4.2) |
| datasets   | * 3.4.2    | 2017-10-06 | local          |
| devtools   | * 1.13.3   | 2017-08-02 | CRAN (R 3.4.2) |
| digest     | 0.6.12     | 2017-01-27 | CRAN (R 3.4.2) |
| evaluate   | 0.10.1     | 2017-06-24 | CRAN (R 3.4.2) |
| formatR    | 1.5        | 2017-04-25 | CRAN (R 3.4.2) |
| graphics   | * 3.4.2    | 2017-10-06 | local          |
| grDevices  | * 3.4.2    | 2017-10-06 | local          |
| highr      | 0.6        | 2016-05-09 | CRAN (R 3.4.2) |
| hms        | 0.3        | 2016-11-22 | CRAN (R 3.4.2) |
| htmltools  | 0.3.6      | 2017-04-28 | CRAN (R 3.4.2) |
| httr       | 1.3.1      | 2017-08-20 | CRAN (R 3.4.2) |
| kableExtra | * 0.5.2    | 2017-09-15 | CRAN (R 3.4.2) |
| knitr      | * 1.17     | 2017-08-10 | CRAN (R 3.4.2) |
| magrittr   | 1.5        | 2014-11-22 | CRAN (R 3.4.2) |
| memoise    | 1.1.0      | 2017-04-21 | CRAN (R 3.4.2) |
| methods    | 3.4.2      | 2017-10-06 | local          |
| parallel   | * 3.4.2    | 2017-10-06 | local          |
| plyr       | 1.8.4      | 2016-06-08 | CRAN (R 3.4.2) |
| R6         | 2.2.2      | 2017-06-17 | CRAN (R 3.4.2) |
| Rcpp       | 0.12.13    | 2017-09-28 | CRAN (R 3.4.2) |
| readr      | 1.1.1      | 2017-05-16 | CRAN (R 3.4.2) |
| reshape2   | * 1.4.2    | 2016-10-22 | CRAN (R 3.4.2) |
| rlang      | 0.1.2      | 2017-08-09 | CRAN (R 3.4.2) |
| rmarkdown  | 1.6        | 2017-06-15 | CRAN (R 3.4.2) |
| rprojroot  | 1.2        | 2017-01-16 | CRAN (R 3.4.2) |
| rvest      | 0.3.2      | 2016-06-17 | CRAN (R 3.4.2) |
| seqinr     | * 3.4-5    | 2017-08-01 | CRAN (R 3.4.2) |

|         |         |            |                |
|---------|---------|------------|----------------|
| stats   | * 3.4.2 | 2017-10-06 | local          |
| stringi | 1.1.5   | 2017-04-07 | CRAN (R 3.4.2) |
| stringr | 1.2.0   | 2017-02-18 | CRAN (R 3.4.2) |
| tibble  | 1.3.4   | 2017-08-22 | CRAN (R 3.4.2) |
| tools   | 3.4.2   | 2017-10-06 | local          |
| utils   | * 3.4.2 | 2017-10-06 | local          |
| withr   | 2.0.0   | 2017-07-28 | CRAN (R 3.4.2) |
| xml2    | 1.1.1   | 2017-01-24 | CRAN (R 3.4.2) |
| yaml    | 2.1.14  | 2016-11-12 | CRAN (R 3.4.2) |

# Heatmaps generated from HMM peptide clustering

*Tomas Bjorklund*

*Wed Nov 1 20:03:56 2017*

This script clusters Polypeptide motifs using the Hammock hidden Markov model peptide clustering and generates Heatmaps for most functional motifs.

```
suppressPackageStartupMessages(library(knitr))
```

## Loading samples

```
all.samples <- readRDS("data/allSamplesDataTable.RDS")
all.samples[, `:=`(Peptide, as.character(Peptide)), ]

setkey(all.samples, Group)
```

## Generation of heatmaps for in vivo transported samples

```
select.samples <- all.samples[J(c("mRNA_30cpc_Str", "mRNA_30cpc_SN", "mRNA_30cpc_Th",
  "mRNA_30cpc_Ctx", "mRNA_3cpc_Str", "mRNA_3cpc_SN", "mRNA_3cpc_Th", "mRNA_3cpc_Ctx",
  "mRNA_30cpc_Str_4wks", "mRNA_30cpc_SN_4wks", "mRNA_30cpc_Th_4wks", "mRNA_30cpc_Ctx_4wks",
  "mRNA_3cpc_Str_4wks", "mRNA_3cpc_SN_4wks", "mRNA_3cpc_Th_4wks", "mRNA_3cpc_Ctx_4wks"))]

select.samples[, `:=`(BCcount, as.integer(mclapply(BC, function(x) length(table(strsplit(paste(t(x),
  collapse = ","), ","))), mc.cores = detectCores())))]
select.samples[, `:=`(Animalcount, as.integer(mclapply(Animals, function(x) length(table(strsplit(paste(t(x),
  collapse = ","), ","))), mc.cores = detectCores())))]
select.samples[, `:=`(Score, BCcount + Animalcount - 1), ]
select.samples.trsp <- unique(select.samples, by = c("Animals", "BC", "LUTnrs"))

fasta.names <- paste(1:nrow(select.samples.trsp), select.samples.trsp$Score,
  select.samples.trsp$Group, sep = "|")
write.fasta(as.list(select.samples.trsp$Peptide), fasta.names, "data/invivoSamplesPeptides.fasta",
  open = "w", nbchar = 60, as.string = TRUE)

# Generate Scoring table for Weblogo Weighting
select.samples.pepMerge <- select.samples.trsp[, sum(Score), by = c("Peptide")]
setnames(select.samples.pepMerge, "V1", "Score")
```

## Executing Hammock Clustering

```
Sys.setenv(PATH = paste("/root/HMMER/binaries", Sys.getenv("PATH"), sep = ":"),
  HHLIB = "/home/rstudio/Hammock_v_1.1.1/hhsuite-2.0.16/lib/hh/")
unlink("/home/rstudio/data/HammockInVivo", recursive = TRUE, force = FALSE)
sys.out <- system(paste("java -jar /home/rstudio/Hammock_v_1.1.1/dist/Hammock.jar full -i /home/rstudio/data/
  detectCores(), sep = ""), intern = TRUE, ignore.stdout = TRUE)

# Alternative parameters --use_clinkage --alignment_threshold 23 --max_shift
# 13 --max_aln_length 37 --count_threshold 50 --max_inner_gaps 0
# --assign_thresholds 14.1,10.5,7.0
```

```
hammock.log <- data.table(readLines("data/HammockInVivo/run.log"))  
  
colnames(hammock.log) <- c("Hammock log file")  
knitr::kable(hammock.log, longtable = T)
```

---

#### Hammock log file

---

2017-11-01 20:04:22.029:

Hammock version 1.1.1 Run with `-help` for a brief description of command line parameters.

2017-11-01 20:04:22.145: Program started in mode "full".

Command-line arguments:

```
full -i /home/rstudio/data/invivoSamplesPeptides.fasta -d /home/rstudio/data/HammockInVivo -max_shift 7 -c 250  
-alignment_threshold 26 -assign_thresholds 50,40,30 -t 32
```

Complete list of input/output parameters:

```
-i, -input /home/rstudio/data/invivoSamplesPeptides.fasta  
-d, -output_directory /home/rstudio/data/HammockInVivo  
-t, -thread 32  
-l, -labels null
```

Complete list of clinkage clustering parameters:

```
-f, -file_format fasta  
-m, -matrix /home/rstudio/Hammock_v_1.1.1/matrices/blosum62.txt  
-g, -alignment_threshold (-greedy_threshold)26  
-x, -max_shift 7  
-p, -gap_penalty 0  
-C, -cache_size_limit 1
```

2017-11-01 20:04:22.146: Loading input sequences...

2017-11-01 20:04:22.250: 15768 unique sequences loaded.

2017-11-01 20:04:22.263: 39001 total sequences loaded.

2017-11-01 20:04:22.263: 15768 unique sequences after non-specified labels filtered out

2017-11-01 20:04:22.278: 39001 total sequences after non-specified labels filtered out

2017-11-01 20:04:22.282: Shortest sequence: 14 AA. Longest sequence: 22 AA.

2017-11-01 20:04:22.282: More than 10 000 unique sequences. Using greedy clustering. Use `-use_clinkage` to force clinkage clustering

2017-11-01 20:04:22.309: Generating input statistics...

2017-11-01 20:04:22.357: Initial greedy clusters limit not set. Setting automatically to: 394

2017-11-01 20:04:22.358: Greedy clustering...

2017-11-01 20:04:27.362: Ready. Clustering time: 5003

2017-11-01 20:04:27.362: Resulting clusters: 12939

2017-11-01 20:04:27.362: Building MSAs...

2017-11-01 20:04:27.657: Ready. Total time: 5299

2017-11-01 20:04:27.657: Saving results to output files...

2017-11-01 20:04:27.993: Greedy clustering results in: /home/rstudio/data/HammockInVivo/initial\_clusters.tsv

2017-11-01 20:04:27.993: and: /home/rstudio/data/HammockInVivo/initial\_clusters\_sequences.tsv

2017-11-01 20:04:27.993: and: /home/rstudio/data/HammockInVivo/initial\_clusters\_sequences\_original\_order.tsv

2017-11-01 20:04:27.993:

Loading clusters...

2017-11-01 20:04:28.059: Maximal alignment length not set. Setting automatically to: 31

2017-11-01 20:04:28.063: Minimal number of match states not set. Setting automatically to: 5

2017-11-01 20:04:28.170: Overlap threshold not set. Setting automatically to:

2017-11-01 20:04:28.177: 10.83,6.19,0.0,

2017-11-01 20:04:28.177: Merge threshold not set. Setting automatically based on average sequence length to:

---

Hammock log file

---

2017-11-01 20:04:28.182: 15.47,13.92,12.38,

Complete list of HMM-based clustering parameters:

-a, -part\_threshold null  
-s, -size\_threshold null  
-c, -count\_threshold 250  
-n, -assign\_thresholds 50.0,40.0,30.0,  
-v, -overlap\_thresholds 10.83,6.19,0.0,  
-r, -merge\_thresholds 15.47,13.92,12.38,  
-e, -relative\_thresholds false  
-b, -absolute\_thresholds true  
-h, -min\_conserved\_positions 5  
-y, -max\_gap\_proportion 0.05  
-k, -min\_ic 1.2  
-j, -max\_aln\_length 31  
-u, -max\_inner\_gaps 0  
-q, -extension\_increase\_length false

2017-11-01 20:04:28.244:

Clustering in 3 rounds...

2017-11-01 20:04:28.246:

2017-11-01 20:04:28.246: Round 1:

2017-11-01 20:04:28.246: 250 clusters remaining

2017-11-01 20:04:28.246: Building hmms and searching database...

2017-11-01 20:04:30.188: Extending clusters...

2017-11-01 20:04:30.213: 0 sequences to be inserted into clusters

2017-11-01 20:04:30.213: 0 clusters to be extended

2017-11-01 20:04:30.214: 0 sequences rejected

2017-11-01 20:04:30.216: 102 cluster pairs to check and merge.

2017-11-01 20:04:30.216: Merging clusters from 33 groups...

2017-11-01 20:04:30.239: Building hhs...

2017-11-01 20:04:30.330: HH clustering...

2017-11-01 20:04:32.646:

2017-11-01 20:04:32.647: Round 2:

2017-11-01 20:04:32.647: 242 clusters remaining

2017-11-01 20:04:32.647: Building hmms and searching database...

2017-11-01 20:04:34.190: Extending clusters...

2017-11-01 20:04:34.199: 0 sequences to be inserted into clusters

2017-11-01 20:04:34.200: 0 clusters to be extended

2017-11-01 20:04:34.200: 0 sequences rejected

2017-11-01 20:04:34.209: 2152 cluster pairs to check and merge.

2017-11-01 20:04:34.209: Merging clusters from 1 groups...

2017-11-01 20:04:34.233: Building hhs...

2017-11-01 20:04:34.311: HH clustering...

2017-11-01 20:04:41.225:

2017-11-01 20:04:41.225: Round 3:

2017-11-01 20:04:41.225: 229 clusters remaining

2017-11-01 20:04:41.226: Building hmms and searching database...

2017-11-01 20:04:42.594: Extending clusters...

2017-11-01 20:04:42.612: 7 sequences to be inserted into clusters

2017-11-01 20:04:42.612: 5 clusters to be extended

2017-11-01 20:04:42.619: 0 sequences rejected

2017-11-01 20:04:42.620: Overlap threshold is 0. Running full cluster merging.



---

## Hammock log file

---

```
2017-11-01 20:04:42.639: Buiding hhs...
2017-11-01 20:04:42.649: HH clustering...
2017-11-01 20:04:53.917:
Ready. Clustering time : 25673
2017-11-01 20:04:53.917: Resulting clusers: 203
2017-11-01 20:04:53.917: Containing 2428 unique sequences and 10180 total sequences.
2017-11-01 20:04:53.926: Unique sequences not assigned: 13340, total sequences not assigned: 28821
2017-11-01 20:04:53.926: Saving results to outupt files...
2017-11-01 20:04:54.050: Results in: /home/rstudio/data/HammockInVivo/final_clusters_sequences.tsv
2017-11-01 20:04:54.050: and: /home/rstudio/data/HammockInVivo/final_clusters.tsv
2017-11-01 20:04:54.051: and: /home/rstudio/data/HammockInVivo/final_clusters_sequences_original_order.tsv
2017-11-01 20:04:54.051:
Calculating KLD...
2017-11-01 20:04:54.242: Final system KLD over match state MSA positions: 18.828779438507368
2017-11-01 20:04:54.243: Final system KLD over all MSA positions: 29.927410491876895
2017-11-01 20:04:54.243: Program successfully ended.
```

---

## Generation of Weblogo visualization

```
ham.clusters <- data.table(read.table("/home/rstudio/data/HammockInVivo/final_clusters.tsv",
  header = TRUE, skip = 0, sep = "\t", stringsAsFactors = FALSE, fill = TRUE))
id.order <- as.list(ham.clusters$cluster_id)
ham.clusters.all <- data.table(read.table("/home/rstudio/data/HammockInVivo/final_clusters_sequences.tsv",
  header = TRUE, skip = 0, sep = "\t", stringsAsFactors = FALSE, fill = TRUE))
ham.clusters.all[, `:=`(alignment, gsub("\\-", "\\_", alignment))]
setkey(select.samples, Peptide)
setkey(select.samples.trsp, Peptide)

unlink("/home/rstudio/data/WEBlogosInVivo", recursive = TRUE, force = FALSE)
dir.create(file.path("/home/rstudio/data/", "WEBlogosInVivo"), showWarnings = FALSE)
dir.create(file.path("/home/rstudio/data/HammockInVivo/", "alignments_final_Scored"),
  showWarnings = FALSE)

setkey(ham.clusters.all, cluster_id)
setkey(ham.clusters, cluster_id)
setkey(select.samples.pepMerge, Peptide)

opts_chunk$set(out.width = "100%", fig.align = "center")
generateWeblogo <- function(in.name) {
  # in.name <- ham.clusters$cluster_id[12] in.name <- 6777
  this.fa <- read.fasta(file = paste("/home/rstudio/data/HammockInVivo/alignments_final/",
    in.name, ".aln", sep = ""))
  allSeqs <- unlist(getSequence(this.fa, as.string = TRUE))
  allSeqs <- data.table(unlist(lapply(allSeqs, function(x) gsub("([-])", "",
    toupper(x)))))
  allSeqs.out <- select.samples.pepMerge[J(allSeqs)]
  allSeqs.out$Annot <- data.table(getName(this.fa))
  allSeqs.out[, `:=`(Annot, paste(Annot, "_", Score, sep = ""))]
  allSeqs.out$Alignment <- data.table(toupper(unlist(getSequence(this.fa,
    as.string = TRUE))))

  allSeqs.out <- allSeqs.out[rep(1:.N, Score)][, `:=`(Indx, 1:.N), by = Peptide]
  allSeqs.out[, `:=`(Annot, paste(Annot, "_", Indx, sep = ""))]
```

```

write.fasta(as.list(allSeqs.out$Alignment), allSeqs.out$Annot, nbchar = 60,
  paste("/home/rstudio/data/HammockInVivo/alignments_final_Scored/", in.name,
    ".aln", sep = ""), open = "w")

this.main <- ham.clusters[J(in.name)]
main.gene <- select.samples.trsp[J(this.main$main_sequence)]$GeneName[1]
this.title <- paste("## Peptide", this.main$main_sequence, "from", main.gene,
  "with cluster number", in.name, sep = " ")

tmp <- system(paste("weblgo --format PDF --sequence-type protein --size large --errorbars NO --resolution",
  this.title, "' < /home/rstudio/data/HammockInVivo/alignments_final_Scored/",
  in.name, ".aln > /home/rstudio/data/WEBlogsInVivo/", in.name, ".pdf",
  sep = ""), intern = TRUE, ignore.stdout = FALSE)
}

invisible(mclapply(id.order, generateWeblogo, mc.cores = detectCores()))

ham.clusters.merged <- ham.clusters

ham.clusters.merged[, `:=`(mRNA_Str, mRNA_30cpc_Str + mRNA_3cpc_Str + mRNA_30cpc_Str_4wks +
  mRNA_3cpc_Str_4wks)]
ham.clusters.merged[, `:=`(mRNA_SN, mRNA_30cpc_SN + mRNA_3cpc_SN + mRNA_30cpc_SN_4wks +
  mRNA_3cpc_SN_4wks)]
ham.clusters.merged[, `:=`(mRNA_Th, mRNA_30cpc_Th + mRNA_3cpc_Th + mRNA_30cpc_Th_4wks +
  mRNA_3cpc_Th_4wks)]
ham.clusters.merged[, `:=`(mRNA_Ctx, mRNA_30cpc_Ctx + mRNA_3cpc_Ctx + mRNA_30cpc_Ctx_4wks +
  mRNA_3cpc_Ctx_4wks)]
ham.clusters.merged[, `:=`(c("mRNA_30cpc_Str", "mRNA_30cpc_SN", "mRNA_30cpc_Th",
  "mRNA_30cpc_Ctx", "mRNA_3cpc_Str", "mRNA_3cpc_SN", "mRNA_3cpc_Th", "mRNA_3cpc_Ctx",
  "mRNA_30cpc_Str_4wks", "mRNA_30cpc_SN_4wks", "mRNA_30cpc_Th_4wks", "mRNA_30cpc_Ctx_4wks",
  "mRNA_3cpc_Str_4wks", "mRNA_3cpc_SN_4wks", "mRNA_3cpc_Th_4wks", "mRNA_3cpc_Ctx_4wks"),
  NULL)]

ham.clusters.merged.melt <- melt(ham.clusters.merged, id = c("cluster_id", "main_sequence",
  "sum"))
setkeyv(ham.clusters.merged.melt, "variable")
ham.clusters.topTen <- setorder(setDT(ham.clusters.merged.melt), -value)[, head(.SD,
  14), keyby = variable]
# ham.clusters.topTen <- ham.clusters.merged.melt[, head(.SD, 15),
# by=variable]
ham.clusters.select <- ham.clusters.merged.melt[ham.clusters.merged.melt$cluster_id %in%
  unique(ham.clusters.topTen$cluster_id)]

ham.clusters.select[, `:=`(geneName, lapply(main_sequence, function(x) select.samples.trsp[J(x)]$GeneName[1]))]
ham.clusters.select[, `:=`(listName, paste("Pep:", main_sequence, "from", geneName,
  "cl:", cluster_id, sep = " "))]

select.samples.out <- acast(ham.clusters.select, listName ~ variable, value.var = "value") #Utilizes reshape
select.samples.out[is.na(select.samples.out)] <- 0
select.samples.out <- select.samples.out[, c(3, 4, 2, 1)]
select.samples.out.scaled <- scale(select.samples.out, center = FALSE, scale = colSums(select.samples.out))
# select.samples.out.scaled <-
# select.samples.out.scaled[order(round(select.samples.out.scaled[,1], digits
# = 2), round(select.samples.out.scaled[,2], digits =
# 2), round(select.samples.out.scaled[,3], digits =

```

```

collapse = ","), ","))), mc.cores = detectCores()))]
select.samples[, `:=`(Score, BCcount + Animalcount - 1), ]
select.samples.trsp <- unique(select.samples, by = c("Animals", "BC", "LUTnrs"))

fasta.names <- paste(1:nrow(select.samples.trsp), select.samples.trsp$Score,
  select.samples.trsp$Group, sep = "|")
write.fasta(as.list(select.samples.trsp$Peptide), fasta.names, "data/invitroSamplesPeptides.fasta",
  open = "w", nbchar = 60, as.string = TRUE)

# Generate Scoring table for Weblogo Weighting
select.samples.pepMerge <- select.samples.trsp[, sum(Score), by = c("Peptide")]
setnames(select.samples.pepMerge, "V1", "Score")

```

## Executing Hammock Clustering

```

Sys.setenv(PATH = paste("/root/HMMER/binaries", Sys.getenv("PATH"), sep = ":"),
  HHLIB = "/home/rstudio/Hammock_v_1.1.1/hhsuite-2.0.16/lib/hh/")
unlink("/home/rstudio/data/HammockInVitro", recursive = TRUE, force = FALSE)
sys.out <- system(paste("java -jar /home/rstudio/Hammock_v_1.1.1/dist/Hammock.jar full -i /home/rstudio/data/
  detectCores(), sep = ""), intern = TRUE, ignore.stdout = TRUE)
# Alternative parameters --use_clinkage --alignment_threshold 23 --max_shift
# 13 --max_aln_length 37 --count_threshold 50 --max_inner_gaps 0
# --assign_thresholds 14.1,10.5,7.0
hammock.log <- data.table(readLines("data/HammockInVitro/run.log"))

colnames(hammock.log) <- c("Hammock log file")
knitr::kable(hammock.log, longtable = T)

```

---

Hammock log file

---

2017-11-01 20:05:17.318:

Hammock version 1.1.1 Run with `-help` for a brief description of command line parameters.

2017-11-01 20:05:17.410: Program started in mode "full".

Command-line arguments:

full -i /home/rstudio/data/invitroSamplesPeptides.fasta -d /home/rstudio/data/HammockInVitro -max\_shift 7 -c 50  
-t 32

Complete list of input/output parameters:

-i, -input /home/rstudio/data/invitroSamplesPeptides.fasta  
-d, -output\_directory /home/rstudio/data/HammockInVitro  
-t, -thread 32  
-l, -labels null

Complete list of clinkage clustering parameters:

-f, -file\_format fasta  
-m, -matrix /home/rstudio/Hammock\_v\_1.1.1/matrices/blosum62.txt  
-g, -alignment\_threshold (-greedy\_threshold)null  
-x, -max\_shift 7  
-p, -gap\_penalty 0  
-C, -cache\_size\_limit 1

---

Hammock log file

---

2017-11-01 20:05:17.410: Loading input sequences...  
2017-11-01 20:05:17.420: 462 unique sequences loaded.  
2017-11-01 20:05:17.421: 518 total sequences loaded.  
2017-11-01 20:05:17.421: 462 unique sequences after non-specified labels filtered out  
2017-11-01 20:05:17.424: 518 total sequences after non-specified labels filtered out  
2017-11-01 20:05:17.424: Shortest sequence: 14 AA. Longest sequence: 22 AA.  
2017-11-01 20:05:17.424: Up to 10 000 unique sequences. Using clinkage clustering. Use `-use_greedy` to force greedy clustering  
2017-11-01 20:05:17.427: Generating input statistics...  
2017-11-01 20:05:17.429: Clinkage clustering threshold not set. Setting automatically to: 26  
2017-11-01 20:05:17.430: Clinkage clustering...  
2017-11-01 20:05:17.887: Ready. Clustering time: 457  
2017-11-01 20:05:17.888: Resulting clusers: 348  
2017-11-01 20:05:17.888: Building MSAs...  
2017-11-01 20:05:17.988: Ready. Total time: 558  
2017-11-01 20:05:17.988: Saving results to output files...  
2017-11-01 20:05:18.021: Clinkage clustering results in: `/home/rstudio/data/HammockInVitro/initial_clusters.tsv`  
2017-11-01 20:05:18.021: and: `/home/rstudio/data/HammockInVitro/initial_clusters_sequences.tsv`  
2017-11-01 20:05:18.021: and: `/home/rstudio/data/HammockInVitro/initial_clusters_sequences_original_order.tsv`  
2017-11-01 20:05:18.021:  
Loading clusters...  
2017-11-01 20:05:18.026: Maximal alignment length not set. Setting automatically to: 30  
2017-11-01 20:05:18.026: Minimal number of match states not set. Setting automatically to: 5  
2017-11-01 20:05:18.042: Assign threshold sequence not set. Setting automatically to:  
2017-11-01 20:05:18.045: 14.35,11.33,8.31,  
2017-11-01 20:05:18.045: Overlap threshold not set. Setting automatically to:  
2017-11-01 20:05:18.046: 10.58,6.04,0.0,  
2017-11-01 20:05:18.046: Merge threshold not set. Setting automatically based on average sequence length to:  
2017-11-01 20:05:18.046: 15.11,13.6,12.09,

Complete list of HMM-based clustering parameters:

-a, `-part_threshold` null  
-s, `-size_threshold` null  
-c, `-count_threshold` 50  
-n, `-assign_thresholds` 14.35,11.33,8.31,  
-v, `-overlap_thresholds` 10.58,6.04,0.0,  
-r, `-merge_thresholds` 15.11,13.6,12.09,  
-e, `-relative_thresholds` false  
-b, `-absolute_thresholds` true  
-h, `-min_conserved_positions` 5  
-y, `-max_gap_proportion` 0.05  
-k, `-min_ic` 1.2  
-j, `-max_aln_length` 30  
-u, `-max_inner_gaps` 0  
-q, `-extension_increase_length` false

2017-11-01 20:05:18.062:  
Clustering in 3 rounds...

2017-11-01 20:05:18.063:  
2017-11-01 20:05:18.063: Round 1:

2017-11-01 20:05:18.063: 50 clusters remaining  
2017-11-01 20:05:18.063: Building hmms and searching database...  
2017-11-01 20:05:18.359: Extending clusters...  
2017-11-01 20:05:18.359: 0 sequences to be inserted into clusters  
2017-11-01 20:05:18.359: 0 clusters to be extended

---

## Hammock log file

---

2017-11-01 20:05:18.360: 0 sequences rejected  
2017-11-01 20:05:18.361: 0 cluster pairs to check and merge.  
2017-11-01 20:05:18.361: Merging clusters from 0 groups...  
2017-11-01 20:05:18.367: Buiding hhs...  
2017-11-01 20:05:18.367: HH clustering...  
2017-11-01 20:05:18.373:  
2017-11-01 20:05:18.373: Round 2:  
  
2017-11-01 20:05:18.373: 50 clusters remaining  
2017-11-01 20:05:18.374: Building hmms and searching database...  
2017-11-01 20:05:18.611: Extending clusters...  
2017-11-01 20:05:18.612: 3 sequences to be inserted into clusters  
2017-11-01 20:05:18.612: 3 clusters to be extended  
2017-11-01 20:05:18.617: 3 sequences rejected  
2017-11-01 20:05:18.618: 9 cluster pairs to check and merge.  
2017-11-01 20:05:18.618: Merging clusters from 5 groups...  
2017-11-01 20:05:18.624: Buiding hhs...  
2017-11-01 20:05:18.638: HH clustering...  
2017-11-01 20:05:18.835:  
2017-11-01 20:05:18.835: Round 3:  
  
2017-11-01 20:05:18.836: 50 clusters remaining  
2017-11-01 20:05:18.836: Building hmms and searching database...  
2017-11-01 20:05:19.082: Extending clusters...  
2017-11-01 20:05:19.082: 19 sequences to be inserted into clusters  
2017-11-01 20:05:19.082: 15 clusters to be extended  
2017-11-01 20:05:19.089: 11 sequences rejected  
2017-11-01 20:05:19.090: Overlap threshold is 0. Running full cluster merging.  
2017-11-01 20:05:19.094: Buiding hhs...  
2017-11-01 20:05:19.125: HH clustering...  
2017-11-01 20:05:21.650:  
Ready. Clustering time : 3588  
2017-11-01 20:05:21.650: Resulting clusers: 44  
2017-11-01 20:05:21.650: Containing 108 unique sequences and 161 total sequences.  
2017-11-01 20:05:21.650: Unique sequences not assigned: 354, total sequences not assigned: 357  
2017-11-01 20:05:21.650: Saving results to outupt files...  
2017-11-01 20:05:21.661: Results in: /home/rstudio/data/HammockInVitro/final\_clusters\_sequences.tsv  
2017-11-01 20:05:21.662: and: /home/rstudio/data/HammockInVitro/final\_clusters.tsv  
2017-11-01 20:05:21.662: and: /home/rstudio/data/HammockInVitro/final\_clusters\_sequences\_original\_order.tsv  
2017-11-01 20:05:21.662:  
Calculating KLD...  
2017-11-01 20:05:21.662: 13 clusters omitted from KLD calculation because each of them only contains a single unique sequence.  
2017-11-01 20:05:21.685: Final system KLD over match state MSA positions: 7.501060786231158  
2017-11-01 20:05:21.685: Final system KLD over all MSA positions: 7.227012879783852  
2017-11-01 20:05:21.686: Program successfully ended.

---

## Generation of Weblogo visualization

```
ham.clusters <- data.table(read.table("/home/rstudio/data/HammockInVitro/final_clusters.tsv",  
  header = TRUE, skip = 0, sep = "\t", stringsAsFactors = FALSE, fill = TRUE))  
id.order <- as.list(ham.clusters$cluster_id)  
ham.clusters.all <- data.table(read.table("/home/rstudio/data/HammockInVitro/final_clusters_sequences.tsv",  
  header = TRUE, skip = 0, sep = "\t", stringsAsFactors = FALSE, fill = TRUE))
```

```

ham.clusters.all[, `:=`(alignment, gsub("\\-", "\\_", alignment))]
setkey(select.samples, Peptide)
setkey(select.samples.trsp, Peptide)

unlink("/home/rstudio/data/WEBlogosInVitro", recursive = TRUE, force = FALSE)
dir.create(file.path("/home/rstudio/data/", "WEBlogosInVitro"), showWarnings = FALSE)
dir.create(file.path("/home/rstudio/data/HammockInVitro/", "alignments_final_Scored"),
  showWarnings = FALSE)

setkey(ham.clusters.all, cluster_id)
setkey(ham.clusters, cluster_id)
setkey(select.samples.pepMerge, Peptide)

opts_chunk$set(out.width = "100%", fig.align = "center")
generateWeblogo <- function(in.name) {
  # in.name <- ham.clusters$cluster_id[12] in.name <- 6777
  this.fa <- read.fasta(file = paste("/home/rstudio/data/HammockInVitro/alignments_final/",
    in.name, ".aln", sep = ""))
  allSeqs <- unlist(getSequence(this.fa, as.string = TRUE))
  allSeqs <- data.table(unlist(lapply(allSeqs, function(x) gsub("([-])", "",
    toupper(x)))))
  allSeqs.out <- select.samples.pepMerge[J(allSeqs)]
  allSeqs.out$Annot <- data.table(getName(this.fa))
  allSeqs.out[, `:=`(Annot, paste(Annot, "_", Score, sep = ""))]
  allSeqs.out$Alignment <- data.table(toupper(unlist(getSequence(this.fa,
    as.string = TRUE))))

  allSeqs.out <- allSeqs.out[rep(1:.N, Score)][, `:=`(Indx, 1:.N), by = Peptide]
  allSeqs.out[, `:=`(Annot, paste(Annot, "_", Indx, sep = ""))]

  write.fasta(as.list(allSeqs.out$Alignment), allSeqs.out$Annot, nbchar = 60,
    paste("/home/rstudio/data/HammockInVitro/alignments_final_Scored/",
      in.name, ".aln", sep = ""), open = "w")

  this.main <- ham.clusters[J(in.name)]
  main.gene <- select.samples.trsp[J(this.main$main_sequence)]$GeneName[1]
  this.title <- paste("## Peptide", this.main$main_sequence, "from", main.gene,
    "with cluster number", in.name, sep = " ")

  tmp <- system(paste("weblogo --format PDF --sequence-type protein --size large --errorbars NO --resolution",
    this.title, "' < /home/rstudio/data/HammockInVitro/alignments_final_Scored/",
    in.name, ".aln > /home/rstudio/data/WEBlogosInVitro/", in.name, ".pdf",
    sep = ""), intern = TRUE, ignore.stdout = FALSE)
}

invisible(mclapply(id.order, generateWeblogo, mc.cores = detectCores()))

ham.clusters.merged <- ham.clusters

# ham.clusters.merged[,mRNA_Str := mRNA_30cpc_Str + mRNA_3cpc_Str +
# mRNA_30cpc_Str_4wks + mRNA_3cpc_Str_4wks] ham.clusters.merged[,mRNA_SN :=
# mRNA_30cpc_SN + mRNA_3cpc_SN + mRNA_30cpc_SN_4wks + mRNA_3cpc_SN_4wks]
# ham.clusters.merged[,mRNA_Th := mRNA_30cpc_Th + mRNA_3cpc_Th +
# mRNA_30cpc_Th_4wks + mRNA_3cpc_Th_4wks] ham.clusters.merged[,mRNA_Ctx :=
# mRNA_30cpc_Ctx + mRNA_3cpc_Ctx + mRNA_30cpc_Ctx_4wks + mRNA_3cpc_Ctx_4wks]

```

```

# ham.clusters.merged[,c('mRNA_30cpc_Str',
# 'mRNA_30cpc_SN', 'mRNA_30cpc_Th', 'mRNA_30cpc_Ctx', 'mRNA_3cpc_Str',
# 'mRNA_3cpc_SN', 'mRNA_3cpc_Th', 'mRNA_3cpc_Ctx', 'mRNA_30cpc_Str_4wks',
# 'mRNA_30cpc_SN_4wks', 'mRNA_30cpc_Th_4wks', 'mRNA_30cpc_Ctx_4wks', 'mRNA_3cpc_Str_4wks', 'mRNA_3cpc_SN_4wks', '
# := NULL]

library(reshape)
ham.clusters.merged.melt <- melt(ham.clusters.merged, id = c("cluster_id", "main_sequence",
"sum"))
setkeyv(ham.clusters.merged.melt, "variable")
ham.clusters.topTen <- setorder(setDT(ham.clusters.merged.melt), -value)[, head(.SD,
8), keyby = variable]
# ham.clusters.topTen <- ham.clusters.merged.melt[, head(.SD, 15),
# by=variable]
ham.clusters.select <- ham.clusters.merged.melt[ham.clusters.merged.melt$cluster_id %in%
unique(ham.clusters.topTen$cluster_id)]

ham.clusters.select[, `:=`(geneName, lapply(main_sequence, function(x) select.samples.trsp[J(x)]$GeneName[1]))]
ham.clusters.select[, `:=`(listName, paste("Pep:", main_sequence, "from", geneName,
"c1:", cluster_id, sep = " "))]

select.samples.out <- acast(ham.clusters.select, listName ~ variable, value.var = "value") #Utilizes reshape
select.samples.out[is.na(select.samples.out)] <- 0
select.samples.out <- select.samples.out[, c(2, 3, 1, 4)]
select.samples.out.scaled <- scale(select.samples.out, center = FALSE, scale = colSums(select.samples.out))
# select.samples.out.scaled <-
# select.samples.out.scaled[order(round(select.samples.out.scaled[,1], digits
# = 2), round(select.samples.out.scaled[,2], digits =
# 2), round(select.samples.out.scaled[,3], digits =
# 2), round(select.samples.out.scaled[,4], digits = 2), decreasing=TRUE),]
pheatmap(select.samples.out.scaled, cluster_rows = TRUE, show_rownames = TRUE,
cluster_cols = FALSE)

```

```

select.samples[, `:=`(Score, BCcount)]
select.samples.trsp <- unique(select.samples, by = c("Animals", "BC", "LUTnrs"))

fasta.names <- paste(1:nrow(select.samples.trsp), select.samples.trsp$Score,
  select.samples.trsp$Group, sep = "|")
write.fasta(as.list(select.samples.trsp$Peptide), fasta.names, "data/DNAsePeptides.fasta",
  open = "w", nbchar = 60, as.string = TRUE)

# Generate Scoring table for Weblogo Weighting
select.samples.pepMerge <- select.samples.trsp[, sum(Score), by = c("Peptide")]
setnames(select.samples.pepMerge, "V1", "Score")

```

## Executing Hammock Clustering

```

Sys.setenv(PATH = paste("/root/HMMER/binaries", Sys.getenv("PATH"), sep = ":"),
  HHLIB = "/home/rstudio/Hammock_v_1.1.1/hhsuite-2.0.16/lib/hh/")
unlink("/home/rstudio/data/HammockDNAse", recursive = TRUE, force = FALSE)
sys.out <- system(paste("java -jar /home/rstudio/Hammock_v_1.1.1/dist/Hammock.jar full -i /home/rstudio/data/
  detectCores(), sep = ""), intern = TRUE, ignore.stdout = TRUE)
# Alternative parameters --use_clinkage --alignment_threshold 23
# --alignment_threshold 26 --assign_thresholds 50,40,30
hammock.log <- data.table(readLines("data/HammockDNAse/run.log"))

colnames(hammock.log) <- c("Hammock log file")
knitr::kable(hammock.log, longtable = T)

```

---

Hammock log file

---

2017-11-01 20:06:04.268:

Hammock version 1.1.1 Run with `-help` for a brief description of command line parameters.

2017-11-01 20:06:04.398: Program started in mode “full”.

Command-line arguments:

full -i /home/rstudio/data/DNAsePeptides.fasta -d /home/rstudio/data/HammockDNAse -max\_shift 7 -c 2000 -t 32

Complete list of input/output parameters:

- i, -input /home/rstudio/data/DNAsePeptides.fasta
- d, -output\_directory /home/rstudio/data/HammockDNAse
- t, -thread 32
- l, -labels null

Complete list of clinkage clustering parameters:

- f, -file\_format fasta
- m, -matrix /home/rstudio/Hammock\_v\_1.1.1/matrices/blosum62.txt
- g, -alignment\_threshold (-greedy\_threshold)null
- x, -max\_shift 7
- p, -gap\_penalty 0
- C, -cache\_size\_limit 1

2017-11-01 20:06:04.399: Loading input sequences...

2017-11-01 20:06:04.567: 49840 unique sequences loaded.

2017-11-01 20:06:04.587: 203706 total sequences loaded.



---

Hammock log file

---

2017-11-01 20:06:04.588: 49840 unique sequences after non-specified labels filtered out  
2017-11-01 20:06:04.616: 203706 total sequences after non-specified labels filtered out  
2017-11-01 20:06:04.624: Shortest sequence: 14 AA. Longest sequence: 22 AA.  
2017-11-01 20:06:04.625: More than 10 000 unique sequences. Using greedy clustering. Use `-use_clinkage` to force clinkage clustering  
2017-11-01 20:06:04.670: Generating input statistics...  
2017-11-01 20:06:04.747: Greedy clustering threshold not set. Setting automatically to: 27  
2017-11-01 20:06:04.748: Initial greedy clusters limit not set. Setting automatically to: 1246  
2017-11-01 20:06:04.749: Greedy clustering...  
2017-11-01 20:06:35.369: Ready. Clustering time: 30620  
2017-11-01 20:06:35.370: Resulting clusters: 35413  
2017-11-01 20:06:35.370: Building MSAs...  
2017-11-01 20:06:36.253: Ready. Total time: 31504  
2017-11-01 20:06:36.253: Saving results to output files...  
2017-11-01 20:06:37.044: Greedy clustering results in: `/home/rstudio/data/HammockDNase/initial_clusters.tsv`  
2017-11-01 20:06:37.045: and: `/home/rstudio/data/HammockDNase/initial_clusters_sequences.tsv`  
2017-11-01 20:06:37.045: and: `/home/rstudio/data/HammockDNase/initial_clusters_sequences_original_order.tsv`  
2017-11-01 20:06:37.045:  
Loading clusters...  
2017-11-01 20:06:37.169: Maximal alignment length not set. Setting automatically to: 32  
2017-11-01 20:06:37.176: Minimal number of match states not set. Setting automatically to: 5  
2017-11-01 20:06:37.428: Assign threshold sequence not set. Setting automatically to:  
2017-11-01 20:06:37.430: 15.14,11.95,8.77,  
2017-11-01 20:06:37.431: Overlap threshold not set. Setting automatically to:  
2017-11-01 20:06:37.435: 11.16,6.38,0.0,  
2017-11-01 20:06:37.435: Merge threshold not set. Setting automatically based on average sequence length to:  
2017-11-01 20:06:37.439: 15.94,14.34,12.75,  
2017-11-01 20:06:37.557: 6 clusters rejected because of match states and information content constraints.

Complete list of HMM-based clustering parameters:

-a, `-part_threshold` null  
-s, `-size_threshold` null  
-c, `-count_threshold` 2000  
-n, `-assign_thresholds` 15.14,11.95,8.77,  
-v, `-overlap_thresholds` 11.16,6.38,0.0,  
-r, `-merge_thresholds` 15.94,14.34,12.75,  
-e, `-relative_thresholds` false  
-b, `-absolute_thresholds` true  
-h, `-min_conserved_positions` 5  
-y, `-max_gap_proportion` 0.05  
-k, `-min_ic` 1.2  
-j, `-max_aln_length` 32  
-u, `-max_inner_gaps` 0  
-q, `-extension_increase_length` false

2017-11-01 20:06:37.746:  
Clustering in 3 rounds...

2017-11-01 20:06:37.748:  
2017-11-01 20:06:37.748: Round 1:

2017-11-01 20:06:37.748: 1994 clusters remaining  
2017-11-01 20:06:37.748: Building hmms and searching database...  
2017-11-01 20:06:59.186: Extending clusters...  
2017-11-01 20:06:59.343: 13792 sequences to be inserted into clusters  
2017-11-01 20:06:59.350: 1553 clusters to be extended  
2017-11-01 20:07:03.859: 10675 sequences rejected

---

## Hammock log file

---

2017-11-01 20:07:03.907: 5089 cluster pairs to check and merge.  
2017-11-01 20:07:03.908: Merging clusters from 98 groups...  
2017-11-01 20:07:04.070: Buiding hhs...  
2017-11-01 20:07:05.077: HH clustering...  
2017-11-01 20:09:50.897:  
2017-11-01 20:09:50.897: Round 2:  
  
2017-11-01 20:09:50.897: 1530 clusters remaining  
2017-11-01 20:09:50.897: Building hmms and searching database...  
2017-11-01 20:10:04.082: Extending clusters...  
2017-11-01 20:10:04.169: 11386 sequences to be inserted into clusters  
2017-11-01 20:10:04.173: 1184 clusters to be extended  
2017-11-01 20:10:08.780: 9109 sequences rejected  
2017-11-01 20:10:08.963: 51972 cluster pairs to check and merge.  
2017-11-01 20:10:08.963: Merging clusters from 1 groups...  
2017-11-01 20:10:09.113: Buiding hhs...  
2017-11-01 20:10:09.657: HH clustering...  
2017-11-01 20:11:29.880:  
2017-11-01 20:11:29.881: Round 3:  
  
2017-11-01 20:11:29.881: 1374 clusters remaining  
2017-11-01 20:11:29.881: Building hmms and searching database...  
2017-11-01 20:11:41.643: Extending clusters...  
2017-11-01 20:11:41.693: 14554 sequences to be inserted into clusters  
2017-11-01 20:11:41.697: 1204 clusters to be extended  
2017-11-01 20:11:48.153: 10703 sequences rejected  
2017-11-01 20:11:48.156: Overlap threshold is 0. Running full cluster merging.  
2017-11-01 20:11:48.264: Buiding hhs...  
2017-11-01 20:11:48.715: HH clustering...  
2017-11-01 20:13:36.448:  
Ready. Clustering time : 418702  
2017-11-01 20:13:36.448: Resulting clusers: 1127  
2017-11-01 20:13:36.448: Containing 25589 unique sequences and 134333 total sequences.  
2017-11-01 20:13:36.463: Unique sequences not assigned: 24251, total sequences not assigned: 69373  
2017-11-01 20:13:36.463: Saving results to outupt files...  
2017-11-01 20:13:36.931: Results in: /home/rstudio/data/HammockDNase/final\_clusters\_sequences.tsv  
2017-11-01 20:13:36.931: and: /home/rstudio/data/HammockDNase/final\_clusters.tsv  
2017-11-01 20:13:36.931: and: /home/rstudio/data/HammockDNase/final\_clusters\_sequences\_original\_order.tsv  
2017-11-01 20:13:36.931:  
Calculating KLD...  
2017-11-01 20:13:36.932: 21 clusters omitted from KLD calculation because each of them only contains a single unique sequence.  
2017-11-01 20:13:38.320: Final system KLD over match state MSA positions: 20.23129789753592  
2017-11-01 20:13:38.320: Final system KLD over all MSA positions: 36.0292448781723  
2017-11-01 20:13:38.320: Program successfully ended.

---

## Generation of Scatter plot generation

```
ham.clusters <- data.table(read.table("/home/rstudio/data/HammockDNase/final_clusters.tsv",  
  header = TRUE, skip = 0, sep = "\t", stringsAsFactors = FALSE, fill = TRUE))  
  
pred.points <- ggplot(data = ham.clusters, aes(x = DNA_AAVlib_DNAse_3cpc, y = DNA_AAVlib_DNAse_30cpc)) +
```

```
labs(x = "DNA_AAVlib_DNAse_3cpc", y = "DNA_AAVlib_DNAse_30cpc") + geom_point()
print(pred.points)
```

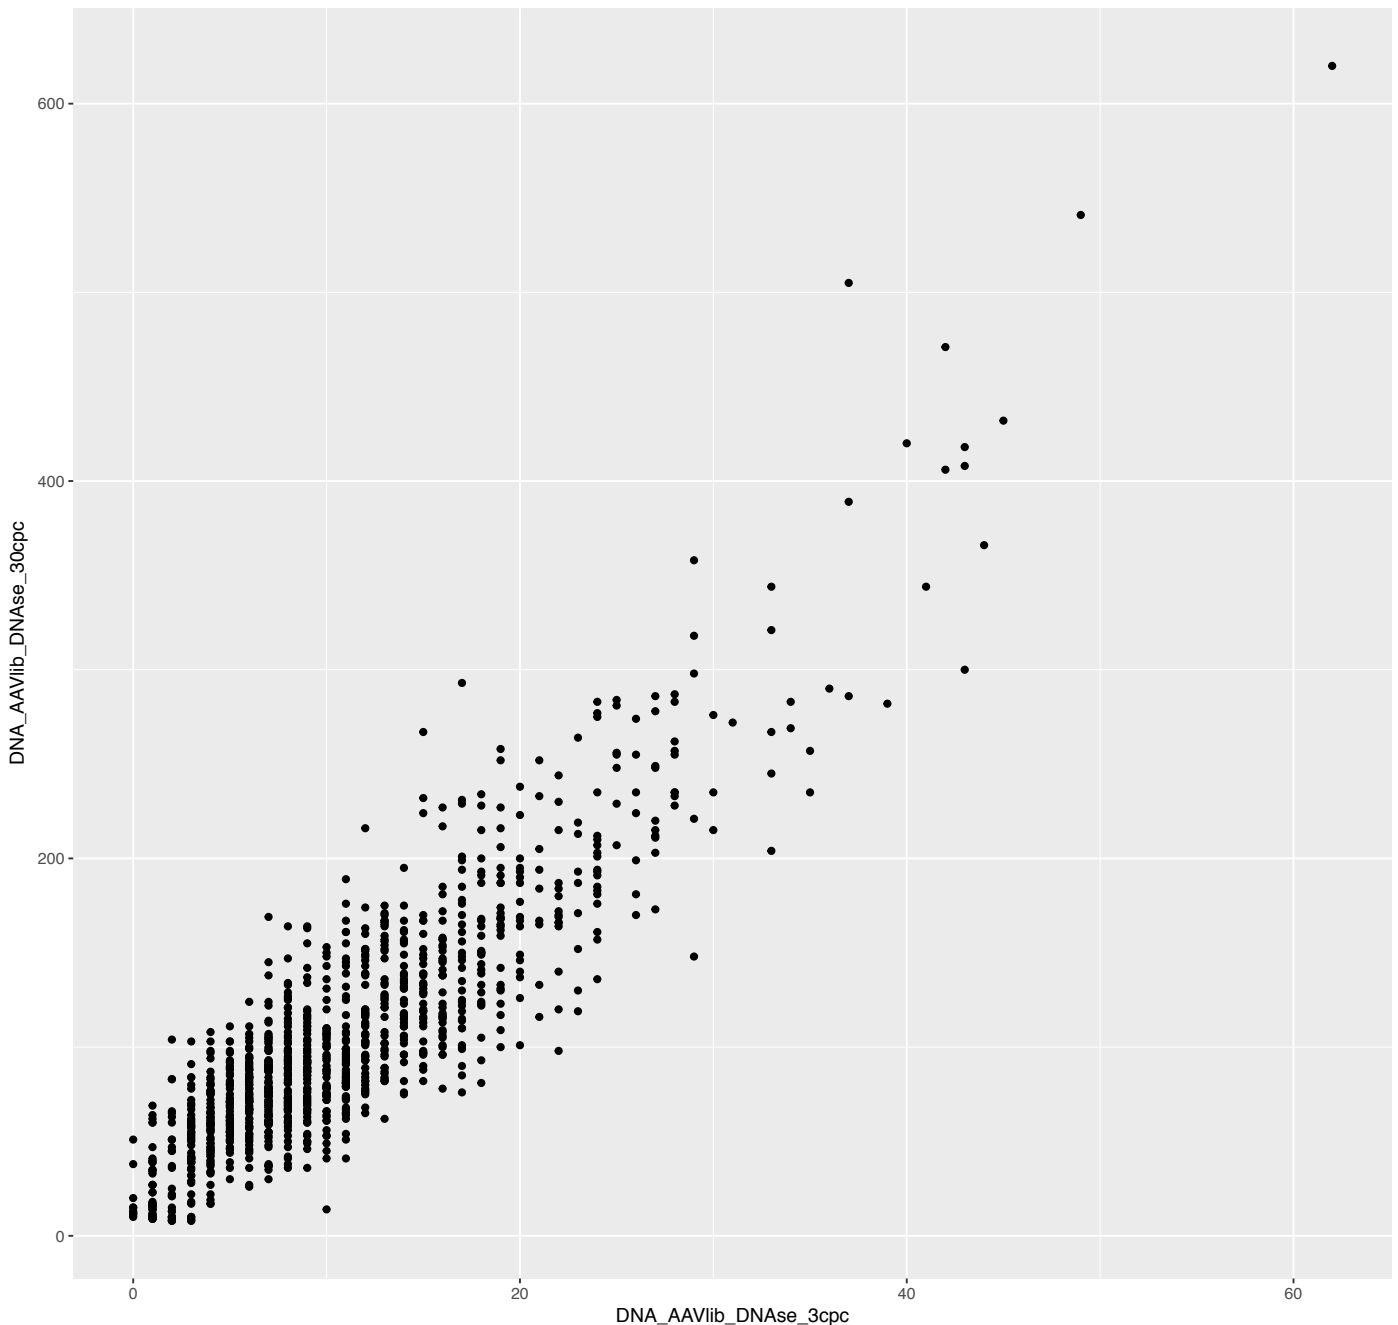

## Clustering DNase resistant virions with library

```
select.samples <- all.samples[J(c("DNA_pscAAVlib", "DNA_pscAAVlib_Prep2"))]

select.samples[, `:=`(BCcount, as.integer(mclapply(BC, function(x) length(table(strsplit(paste(t(x),
collapse = ","), ","))), mc.cores = detectCores())))]
select.samples[, `:=`(Score, BCcount)]
select.samples.trsp <- unique(select.samples, by = c("Animals", "BC", "LUTnrs"))
```

```

fasta.names <- paste(1:nrow(select.samples.trsp), select.samples.trsp$Score,
  select.samples.trsp$Group, sep = "|")
write.fasta(as.list(select.samples.trsp$Peptide), fasta.names, "data/LibDNasePeptides.fasta",
  open = "w", nbchar = 60, as.string = TRUE)

# Generate Scoring table for Weblogo Weighting
select.samples.pepMerge <- select.samples.trsp[, sum(Score), by = c("Peptide")]
setnames(select.samples.pepMerge, "V1", "Score")

```

## Executing Hammock Clustering

```

Sys.setenv(PATH = paste("/root/HMMER/binaries", Sys.getenv("PATH"), sep = ":"),
  HHLIB = "/home/rstudio/Hammock_v_1.1.1/hhsuite-2.0.16/lib/hh/")
unlink("/home/rstudio/data/HammockLibDNase", recursive = TRUE, force = FALSE)
sys.out <- system(paste("java -jar /home/rstudio/Hammock_v_1.1.1/dist/Hammock.jar full -i /home/rstudio/data/
  detectCores(), sep = ""), intern = TRUE, ignore.stdout = TRUE)
# Alternative parameters --use_clinkage --alignment_threshold 23
# --alignment_threshold 26 --assign_thresholds 50,40,30
hammock.log <- data.table(readLines("data/HammockLibDNase/run.log"))

colnames(hammock.log) <- c("Hammock log file")
knitr::kable(hammock.log, longtable = T)

```

---

Hammock log file

---

2017-11-01 20:14:05.475:

Hammock version 1.1.1 Run with `-help` for a brief description of command line parameters.

2017-11-01 20:14:05.586: Program started in mode "full".

Command-line arguments:

full -i /home/rstudio/data/LibDNasePeptides.fasta -d /home/rstudio/data/HammockLibDNase -max\_shift 7 -c 2000  
-t 32

Complete list of input/output parameters:

-i, -input /home/rstudio/data/LibDNasePeptides.fasta  
-d, -output\_directory /home/rstudio/data/HammockLibDNase  
-t, -thread 32  
-l, -labels null

Complete list of clinkage clustering parameters:

-f, -file\_format fasta  
-m, -matrix /home/rstudio/Hammock\_v\_1.1.1/matrices/blosum62.txt  
-g, -alignment\_threshold (-greedy\_threshold)null  
-x, -max\_shift 7  
-p, -gap\_penalty 0  
-C, -cache\_size\_limit 1

2017-11-01 20:14:05.587: Loading input sequences...

2017-11-01 20:14:05.825: 60179 unique sequences loaded.

2017-11-01 20:14:05.848: 2906509 total sequences loaded.

2017-11-01 20:14:05.849: 60179 unique sequences after non-specified labels filtered out

2017-11-01 20:14:05.884: 2906509 total sequences after non-specified labels filtered out

---

Hammock log file

---

2017-11-01 20:14:05.893: Shortest sequence: 14 AA. Longest sequence: 22 AA.  
2017-11-01 20:14:05.893: More than 10 000 unique sequences. Using greedy clustering. Use `-use_clinkage` to force  
clinkage clustering  
2017-11-01 20:14:05.945: Generating input statistics...  
2017-11-01 20:14:06.040: Greedy clustering threshold not set. Setting automatically to: 27  
2017-11-01 20:14:06.040: Initial greedy clusters limit not set. Setting automatically to: 1504  
2017-11-01 20:14:06.042: Greedy clustering...  
2017-11-01 20:14:54.443: Ready. Clustering time: 48401  
2017-11-01 20:14:54.443: Resulting clusers: 40062  
2017-11-01 20:14:54.444: Building MSAs...  
2017-11-01 20:14:55.625: Ready. Total time: 49583  
2017-11-01 20:14:55.625: Saving results to output files...  
2017-11-01 20:14:56.481: Greedy clustering results in: `/home/rstudio/data/HammockLibDNase/initial_clusters.tsv`  
2017-11-01 20:14:56.482: and: `/home/rstudio/data/HammockLibDNase/initial_clusters_sequences.tsv`  
2017-11-01 20:14:56.482: and:  
`/home/rstudio/data/HammockLibDNase/initial_clusters_sequences_original_order.tsv`  
2017-11-01 20:14:56.482:  
Loading clusters...  
2017-11-01 20:14:56.622: Maximal alignment length not set. Setting automatically to: 32  
2017-11-01 20:14:56.629: Minimal number of match states not set. Setting automatically to: 5  
2017-11-01 20:14:56.895: Assign threshold sequence not set. Setting automatically to:  
2017-11-01 20:14:56.897: 15.3,12.08,8.86,  
2017-11-01 20:14:56.897: Overlap threshold not set. Setting automatically to:  
2017-11-01 20:14:56.901: 11.28,6.44,0.0,  
2017-11-01 20:14:56.901: Merge threshold not set. Setting automatically based on average sequence length to:  
2017-11-01 20:14:56.905: 16.11,14.5,12.89,  
2017-11-01 20:14:57.020: 3 clusters rejected because of match states and information content constraints.

Complete list of HMM-based clustering parameters:

-a, `-part_threshold` null  
-s, `-size_threshold` null  
-c, `-count_threshold` 2000  
-n, `-assign_thresholds` 15.3,12.08,8.86,  
-v, `-overlap_thresholds` 11.28,6.44,0.0,  
-r, `-merge_thresholds` 16.11,14.5,12.89,  
-e, `-relative_thresholds` false  
-b, `-absolute_thresholds` true  
-h, `-min_conserved_positions` 5  
-y, `-max_gap_proportion` 0.05  
-k, `-min_ic` 1.2  
-j, `-max_aln_length` 32  
-u, `-max_inner_gaps` 0  
-q, `-extension_increase_length` false

2017-11-01 20:14:57.203:  
Clustering in 3 rounds...  
2017-11-01 20:14:57.204:  
2017-11-01 20:14:57.204: Round 1:

2017-11-01 20:14:57.205: 1997 clusters remaining  
2017-11-01 20:14:57.205: Building hmms and searching database...  
2017-11-01 20:15:19.930: Extending clusters...  
2017-11-01 20:15:20.097: 15752 sequences to be inserted into clusters  
2017-11-01 20:15:20.106: 1560 clusters to be extended  
2017-11-01 20:15:24.592: 10906 sequences rejected  
2017-11-01 20:15:24.643: 4665 cluster pairs to check and merge.

---

## Hammock log file

---

2017-11-01 20:15:24.644: Merging clusters from 84 groups...  
2017-11-01 20:15:24.793: Buiding hhs...  
2017-11-01 20:15:25.796: HH clustering...  
2017-11-01 20:17:11.700:  
2017-11-01 20:17:11.700: Round 2:  
  
2017-11-01 20:17:11.700: 1739 clusters remaining  
2017-11-01 20:17:11.700: Building hmms and searching database...  
2017-11-01 20:17:27.477: Extending clusters...  
2017-11-01 20:17:27.572: 12758 sequences to be inserted into clusters  
2017-11-01 20:17:27.575: 1313 clusters to be extended  
2017-11-01 20:17:32.974: 10118 sequences rejected  
2017-11-01 20:17:33.166: 67740 cluster pairs to check and merge.  
2017-11-01 20:17:33.167: Merging clusters from 1 groups...  
2017-11-01 20:17:33.296: Buiding hhs...  
2017-11-01 20:17:33.939: HH clustering...  
2017-11-01 20:19:09.955:  
2017-11-01 20:19:09.956: Round 3:  
  
2017-11-01 20:19:09.956: 1558 clusters remaining  
2017-11-01 20:19:09.956: Building hmms and searching database...  
2017-11-01 20:19:24.858: Extending clusters...  
2017-11-01 20:19:24.921: 16600 sequences to be inserted into clusters  
2017-11-01 20:19:24.925: 1331 clusters to be extended  
2017-11-01 20:19:32.199: 11821 sequences rejected  
2017-11-01 20:19:32.203: Overlap threshold is 0. Running full cluster merging.  
2017-11-01 20:19:32.363: Buiding hhs...  
2017-11-01 20:19:32.838: HH clustering...  
2017-11-01 20:21:16.119:  
Ready. Clustering time : 378916  
2017-11-01 20:21:16.119: Resulting clusers: 1340  
2017-11-01 20:21:16.119: Containing 34315 unique sequences and 1936731 total sequences.  
2017-11-01 20:21:16.129: Unique sequences not assigned: 25864, total sequences not assigned: 969778  
2017-11-01 20:21:16.130: Saving results to outupt files...  
2017-11-01 20:21:16.787: Results in: /home/rstudio/data/HammockLibDNase/final\_clusters\_sequences.tsv  
2017-11-01 20:21:16.787: and: /home/rstudio/data/HammockLibDNase/final\_clusters.tsv  
2017-11-01 20:21:16.787: and: /home/rstudio/data/HammockLibDNase/final\_clusters\_sequences\_original\_order.tsv  
2017-11-01 20:21:16.787:  
Calculating KLD...  
2017-11-01 20:21:16.788: 21 clusters omitted from KLD calculation because each of them only contains a single unique sequence.  
2017-11-01 20:21:18.589: Final system KLD over match state MSA positions: 21.284280102889714  
2017-11-01 20:21:18.589: Final system KLD over all MSA positions: 39.68035578266766  
2017-11-01 20:21:18.589: Program successfully ended.

---

## Generation of Scatter plot generation

```
ham.clusters <- data.table(read.table("/home/rstudio/data/HammockLibDNase/final_clusters.tsv",  
  header = TRUE, skip = 0, sep = "\t", stringsAsFactors = FALSE, fill = TRUE))  
  
pred.points <- ggplot(data = ham.clusters, aes(x = DNA_pscAAVlib, y = DNA_pscAAVlib_Prep2)) +  
  labs(x = "DNA_pscAAVlib", y = "DNA_pscAAVlib_Prep2") + geom_point()
```

```
print(pred.points)
```

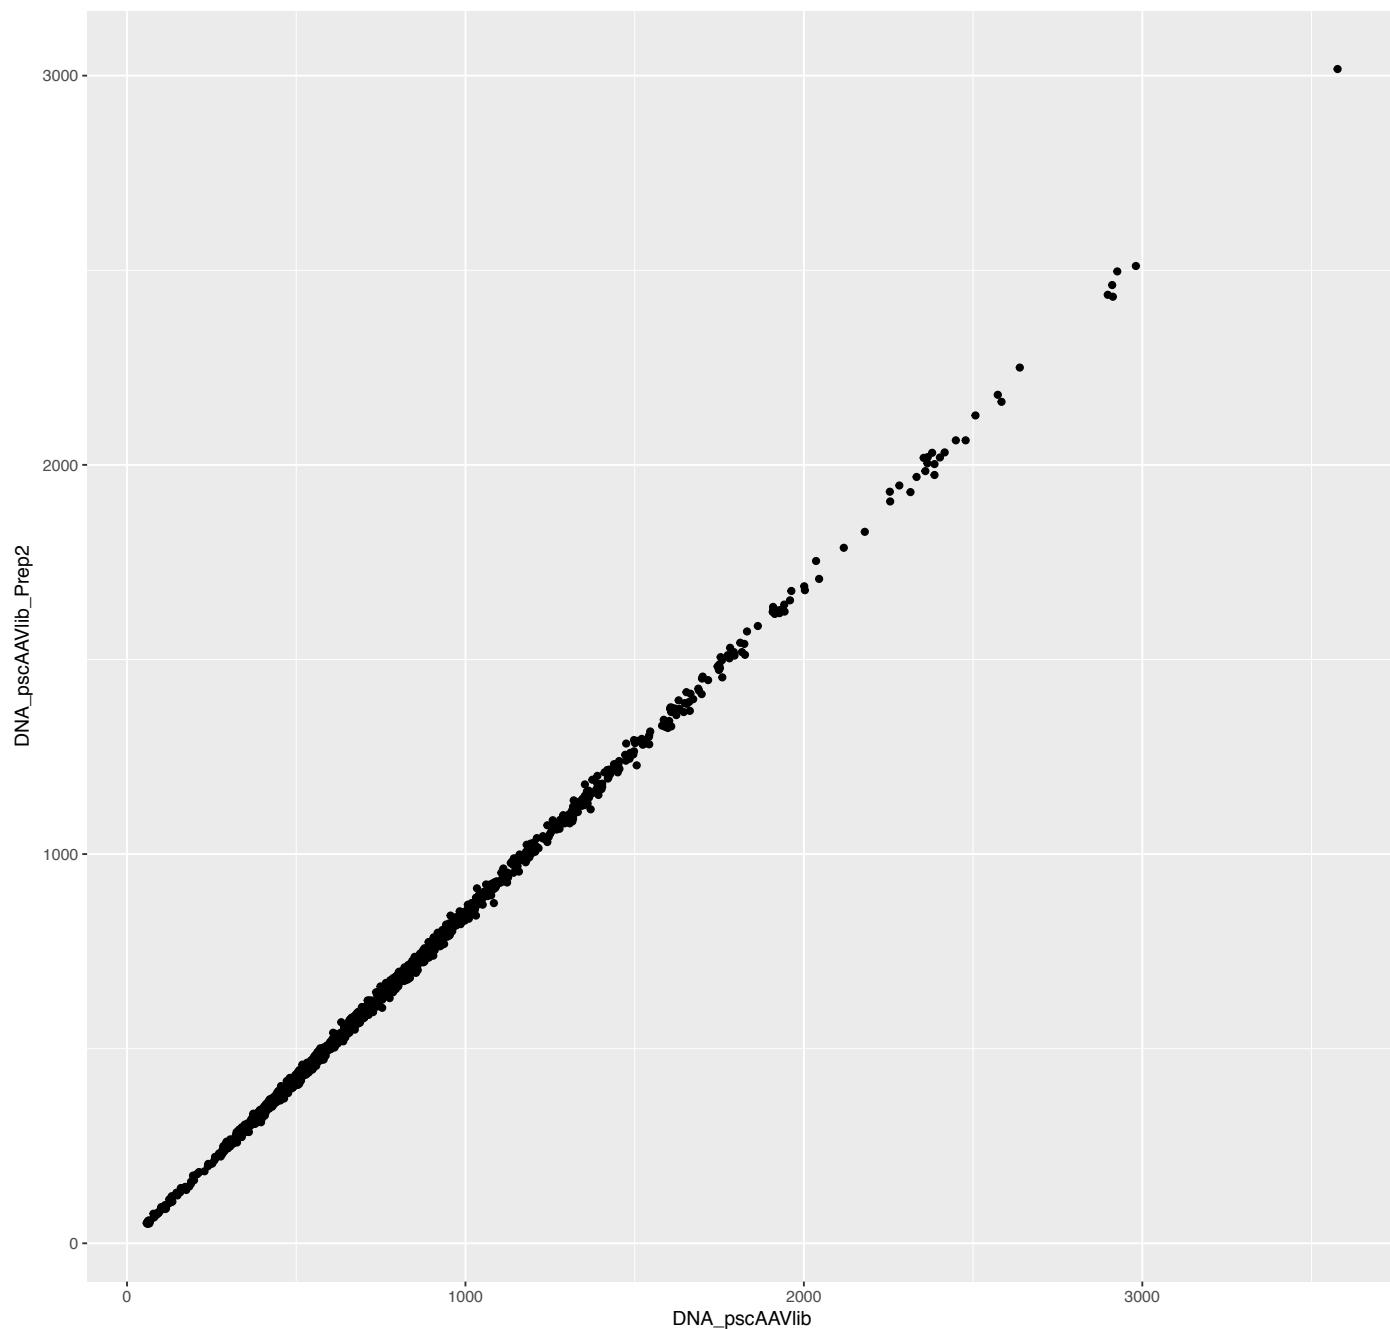

## Clustering DNase resistant virions with library

```
select.samples <- all.samples[J(c("DNA_pscAAVlib_Prep2", "DNA_AAVlib_DNase_3cpc",  
  "DNA_AAVlib_DNase_30cpc"))]  
  
select.samples[, `:=`(BCcount, as.integer(mclapply(BC, function(x) length(table(strsplit(paste(t(x),  
  collapse = ","), ","))), mc.cores = detectCores())))]  
select.samples[, `:=`(Score, BCcount)]  
select.samples.trsp <- unique(select.samples, by = c("Animals", "BC", "LUTnrs"))
```

```

fasta.names <- paste(1:nrow(select.samples.trsp), select.samples.trsp$Score,
  select.samples.trsp$Group, sep = "|")
write.fasta(as.list(select.samples.trsp$Peptide), fasta.names, "data/LibDNasePeptides.fasta",
  open = "w", nbchar = 60, as.string = TRUE)

# Generate Scoring table for Weblogo Weighting
select.samples.pepMerge <- select.samples.trsp[, sum(Score), by = c("Peptide")]
setnames(select.samples.pepMerge, "V1", "Score")

```

## Executing Hammock Clustering

```

Sys.setenv(PATH = paste("/root/HMMER/binaries", Sys.getenv("PATH"), sep = ":"),
  HHLIB = "/home/rstudio/Hammock_v_1.1.1/hhsuite-2.0.16/lib/hh/")
unlink("/home/rstudio/data/HammockLibDNase", recursive = TRUE, force = FALSE)
sys.out <- system(paste("java -jar /home/rstudio/Hammock_v_1.1.1/dist/Hammock.jar full -i /home/rstudio/data/
  detectCores(), sep = ""), intern = TRUE, ignore.stdout = TRUE)
# Alternative parameters --use_clinkage --alignment_threshold 23
# --alignment_threshold 26 --assign_thresholds 50,40,30
hammock.log <- data.table(readLines("data/HammockLibDNase/run.log"))

colnames(hammock.log) <- c("Hammock log file")
knitr::kable(hammock.log, longtable = T)

```

---

Hammock log file

---

2017-11-01 20:21:44.692:

Hammock version 1.1.1 Run with `-help` for a brief description of command line parameters.

2017-11-01 20:21:44.816: Program started in mode "full".

Command-line arguments:

```
full -i /home/rstudio/data/LibDNasePeptides.fasta -d /home/rstudio/data/HammockLibDNase -max_shift 7 -c 2000
-t 32
```

Complete list of input/output parameters:

```
-i, -input /home/rstudio/data/LibDNasePeptides.fasta
-d, -output_directory /home/rstudio/data/HammockLibDNase
-t, -thread 32
-l, -labels null
```

Complete list of clinkage clustering parameters:

```
-f, -file_format fasta
-m, -matrix /home/rstudio/Hammock_v_1.1.1/matrices/blosum62.txt
-g, -alignment_threshold (-greedy_threshold)null
-x, -max_shift 7
-p, -gap_penalty 0
-C, -cache_size_limit 1
```

2017-11-01 20:21:44.817: Loading input sequences...

2017-11-01 20:21:45.109: 60086 unique sequences loaded.

2017-11-01 20:21:45.138: 1535104 total sequences loaded.

2017-11-01 20:21:45.138: 60086 unique sequences after non-specified labels filtered out

2017-11-01 20:21:45.182: 1535104 total sequences after non-specified labels filtered out



---

Hammock log file

---

2017-11-01 20:21:45.194: Shortest sequence: 14 AA. Longest sequence: 22 AA.  
2017-11-01 20:21:45.194: More than 10 000 unique sequences. Using greedy clustering. Use `-use_clinkage` to force  
clinkage clustering  
2017-11-01 20:21:45.260: Generating input statistics...  
2017-11-01 20:21:45.380: Greedy clustering threshold not set. Setting automatically to: 27  
2017-11-01 20:21:45.380: Initial greedy clusters limit not set. Setting automatically to: 1502  
2017-11-01 20:21:45.381: Greedy clustering...  
2017-11-01 20:22:34.960: Ready. Clustering time: 49578  
2017-11-01 20:22:34.961: Resulting clusers: 39583  
2017-11-01 20:22:34.961: Building MSAs...  
2017-11-01 20:22:36.116: Ready. Total time: 50734  
2017-11-01 20:22:36.117: Saving results to output files...  
2017-11-01 20:22:37.032: Greedy clustering results in: `/home/rstudio/data/HammockLibDNase/initial_clusters.tsv`  
2017-11-01 20:22:37.033: and: `/home/rstudio/data/HammockLibDNase/initial_clusters_sequences.tsv`  
2017-11-01 20:22:37.033: and:  
`/home/rstudio/data/HammockLibDNase/initial_clusters_sequences_original_order.tsv`  
2017-11-01 20:22:37.033:  
Loading clusters...  
2017-11-01 20:22:37.176: Maximal alignment length not set. Setting automatically to: 32  
2017-11-01 20:22:37.184: Minimal number of match states not set. Setting automatically to: 5  
2017-11-01 20:22:37.458: Assign threshold sequence not set. Setting automatically to:  
2017-11-01 20:22:37.461: 15.3,12.08,8.86,  
2017-11-01 20:22:37.461: Overlap threshold not set. Setting automatically to:  
2017-11-01 20:22:37.467: 11.27,6.44,0.0,  
2017-11-01 20:22:37.467: Merge threshold not set. Setting automatically based on average sequence length to:  
2017-11-01 20:22:37.472: 16.1,14.49,12.88,  
2017-11-01 20:22:37.602: 6 clusters rejected because of match states and information content constraints.

Complete list of HMM-based clustering parameters:

-a, `-part_threshold` null  
-s, `-size_threshold` null  
-c, `-count_threshold` 2000  
-n, `-assign_thresholds` 15.3,12.08,8.86,  
-v, `-overlap_thresholds` 11.27,6.44,0.0,  
-r, `-merge_thresholds` 16.1,14.49,12.88,  
-e, `-relative_thresholds` false  
-b, `-absolute_thresholds` true  
-h, `-min_conserved_positions` 5  
-y, `-max_gap_proportion` 0.05  
-k, `-min_ic` 1.2  
-j, `-max_aln_length` 32  
-u, `-max_inner_gaps` 0  
-q, `-extension_increase_length` false

2017-11-01 20:22:37.792:  
Clustering in 3 rounds...

2017-11-01 20:22:37.794:  
2017-11-01 20:22:37.794: Round 1:

2017-11-01 20:22:37.794: 1994 clusters remaining  
2017-11-01 20:22:37.794: Building hmms and searching database...  
2017-11-01 20:22:59.916: Extending clusters...  
2017-11-01 20:23:00.059: 16358 sequences to be inserted into clusters  
2017-11-01 20:23:00.069: 1568 clusters to be extended  
2017-11-01 20:23:06.086: 11310 sequences rejected  
2017-11-01 20:23:06.152: 4703 cluster pairs to check and merge.

---

## Hammock log file

---

```
2017-11-01 20:23:06.152: Merging clusters from 84 groups...
2017-11-01 20:23:06.364: Buiding hhs...
2017-11-01 20:23:07.377: HH clustering...
2017-11-01 20:24:53.748:
2017-11-01 20:24:53.748: Round 2:

2017-11-01 20:24:53.749: 1735 clusters remaining
2017-11-01 20:24:53.749: Building hmms and searching database...
2017-11-01 20:25:09.238: Extending clusters...
2017-11-01 20:25:09.343: 12559 sequences to be inserted into clusters
2017-11-01 20:25:09.346: 1300 clusters to be extended
2017-11-01 20:25:14.878: 10059 sequences rejected
2017-11-01 20:25:15.073: 72128 cluster pairs to check and merge.
2017-11-01 20:25:15.074: Merging clusters from 1 groups...
2017-11-01 20:25:15.204: Buiding hhs...
2017-11-01 20:25:15.794: HH clustering...
2017-11-01 20:26:42.914:
2017-11-01 20:26:42.914: Round 3:

2017-11-01 20:26:42.914: 1571 clusters remaining
2017-11-01 20:26:42.914: Building hmms and searching database...
2017-11-01 20:26:58.109: Extending clusters...
2017-11-01 20:26:58.175: 16562 sequences to be inserted into clusters
2017-11-01 20:26:58.179: 1360 clusters to be extended
2017-11-01 20:27:05.805: 11873 sequences rejected
2017-11-01 20:27:05.809: Overlap threshold is 0. Running full cluster merging.
2017-11-01 20:27:05.940: Buiding hhs...
2017-11-01 20:27:06.451: HH clustering...
2017-11-01 20:28:52.048:
Ready. Clustering time : 374255
2017-11-01 20:28:52.048: Resulting clusers: 1345
2017-11-01 20:28:52.049: Containing 34643 unique sequences and 1030396 total sequences.
2017-11-01 20:28:52.057: Unique sequences not assigned: 25443, total sequences not assigned: 504708
2017-11-01 20:28:52.057: Saving results to outupt files...
2017-11-01 20:28:52.678: Results in: /home/rstudio/data/HammockLibDNase/final_clusters_sequences.tsv
2017-11-01 20:28:52.678: and: /home/rstudio/data/HammockLibDNase/final_clusters.tsv
2017-11-01 20:28:52.678: and: /home/rstudio/data/HammockLibDNase/final_clusters_sequences_original_order.tsv
2017-11-01 20:28:52.678:
Calculating KLD...
2017-11-01 20:28:52.679: 31 clusters omitted from KLD calculation because each of them only contains a single unique
sequence.
2017-11-01 20:28:54.606: Final system KLD over match state MSA positions: 21.314423213245473
2017-11-01 20:28:54.606: Final system KLD over all MSA positions: 39.98132228244945
2017-11-01 20:28:54.606: Program successfully ended.
```

---

## Generation of Scatter plot generation

```
ham.clusters <- data.table(read.table("/home/rstudio/data/HammockLibDNase/final_clusters.tsv",
  header = TRUE, skip = 0, sep = "\t", stringsAsFactors = FALSE, fill = TRUE))

pred.points <- ggplot(data = ham.clusters, aes(x = DNA_pscAAVlib_Prep2, y = DNA_AAVlib_DNase_30cpc)) +
  labs(x = "DNA_pscAAVlib_Prep2", y = "DNA_AAVlib_DNase_30cpc") + geom_point()
```

```
print(pred.points)
```

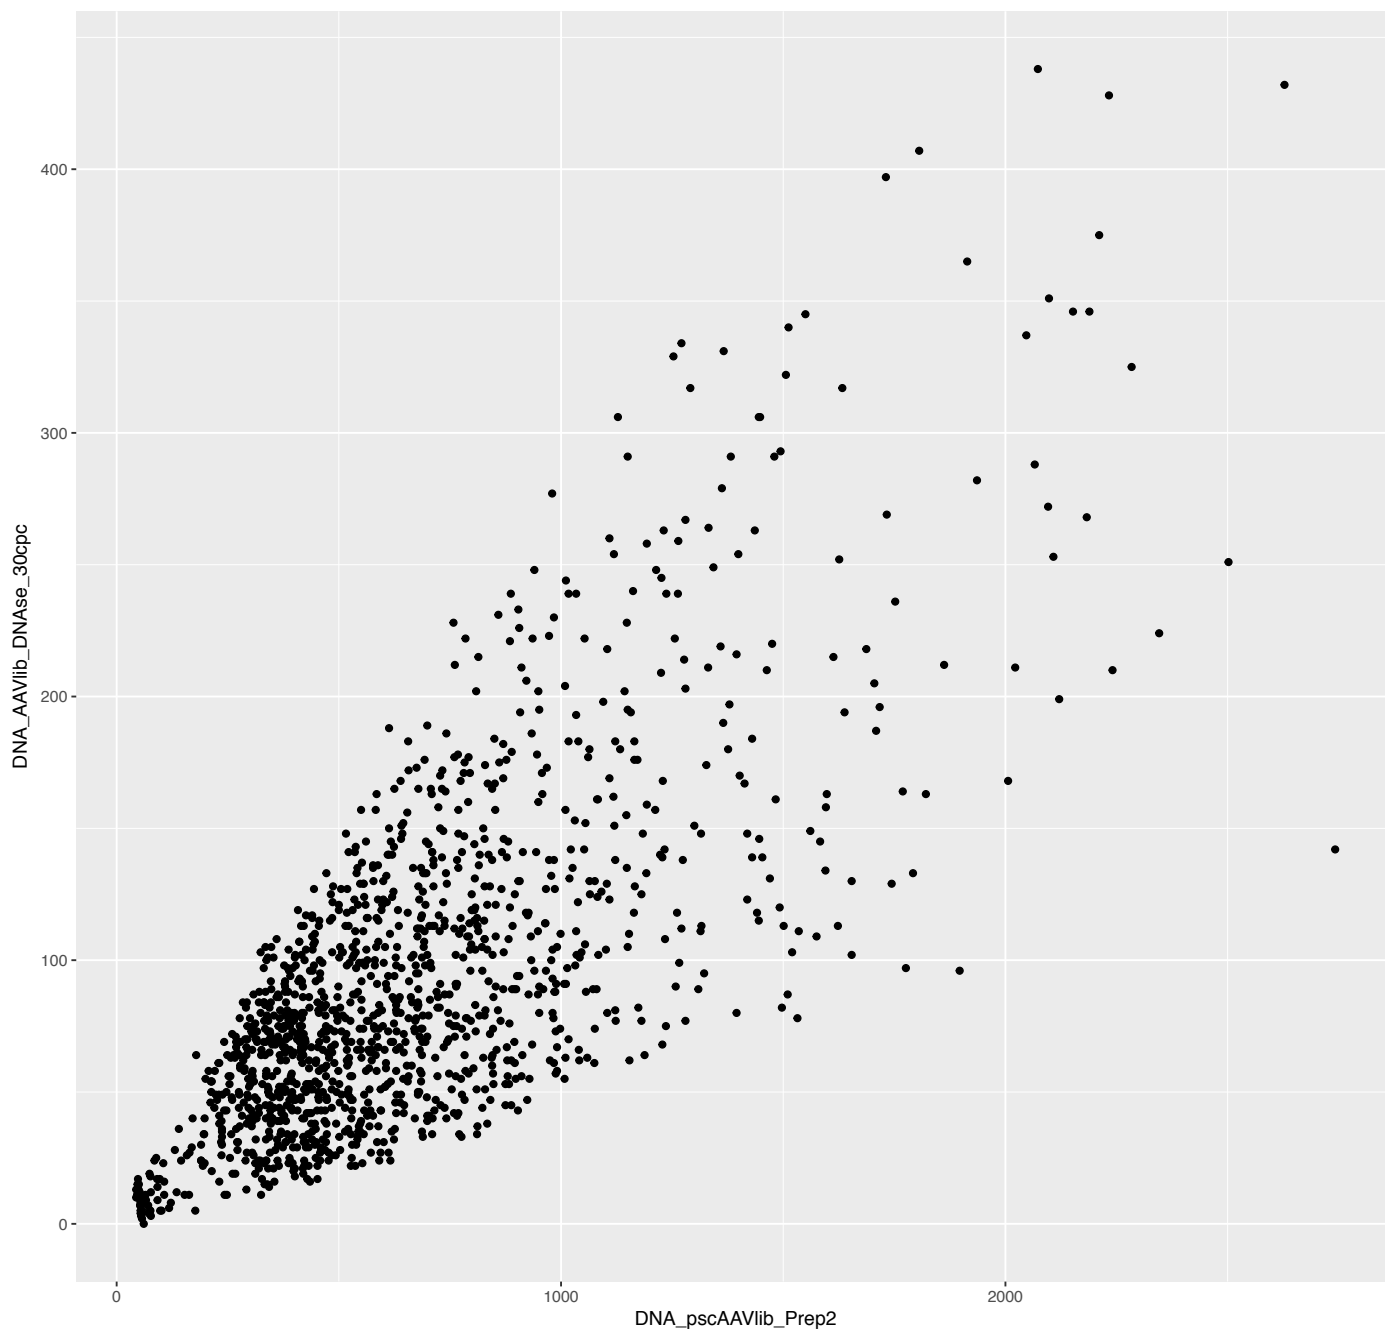

```
print("Total analysis time:")
```

```
[1] "Total analysis time:"
```

```
print(Sys.time() - strt1)
```

```
Time difference of 24.77801 mins
```

```
devtools::session_info()
```

```
Session info -----
```

```
setting  value
version  R version 3.4.2 (2017-09-28)
system   x86_64, linux-gnu
```

```

ui          X11
language    (EN)
collate     en_US.UTF-8
tz          UTC
date        2017-11-01

```

Packages -----

| package           | * version  | date       | source         |
|-------------------|------------|------------|----------------|
| acepack           | 1.4.1      | 2016-10-29 | CRAN (R 3.4.2) |
| ade4              | 1.7-8      | 2017-08-09 | CRAN (R 3.4.2) |
| annotate          | 1.54.0     | 2017-10-13 | Bioconductor   |
| AnnotationDbi     | 1.38.2     | 2017-10-13 | Bioconductor   |
| AnnotationFilter  | 1.0.0      | 2017-10-13 | Bioconductor   |
| AnnotationHub     | 2.8.2      | 2017-10-13 | Bioconductor   |
| backports         | 1.1.1      | 2017-09-25 | CRAN (R 3.4.2) |
| base              | * 3.4.2    | 2017-10-06 | local          |
| base64enc         | 0.1-3      | 2015-07-28 | CRAN (R 3.4.2) |
| Biobase           | * 2.36.2   | 2017-10-13 | Bioconductor   |
| BiocGenerics      | * 0.22.1   | 2017-10-13 | Bioconductor   |
| BiocInstaller     | 1.26.1     | 2017-10-10 | Bioconductor   |
| BiocParallel      | 1.10.1     | 2017-10-13 | Bioconductor   |
| biomaRt           | 2.32.1     | 2017-10-13 | Bioconductor   |
| Biostrings        | * 2.44.2   | 2017-10-13 | Bioconductor   |
| biovizBase        | 1.24.0     | 2017-10-13 | Bioconductor   |
| bit               | 1.1-12     | 2014-04-09 | CRAN (R 3.4.2) |
| bit64             | 0.9-7      | 2017-05-08 | CRAN (R 3.4.2) |
| bitops            | 1.0-6      | 2013-08-17 | CRAN (R 3.4.2) |
| blob              | 1.1.0      | 2017-06-17 | CRAN (R 3.4.2) |
| BSeqGen           | 1.44.2     | 2017-10-13 | Bioconductor   |
| checkmate         | 1.8.4      | 2017-09-25 | CRAN (R 3.4.2) |
| cluster           | 2.0.6      | 2017-03-16 | CRAN (R 3.4.2) |
| codetools         | 0.2-15     | 2016-10-05 | CRAN (R 3.4.2) |
| colorspace        | 1.3-2      | 2016-12-14 | CRAN (R 3.4.2) |
| compiler          | 3.4.2      | 2017-10-06 | local          |
| curl              | 2.8.1      | 2017-07-21 | CRAN (R 3.4.2) |
| data.table        | * 1.10.4-2 | 2017-10-12 | CRAN (R 3.4.2) |
| datasets          | * 3.4.2    | 2017-10-06 | local          |
| DBI               | 0.7        | 2017-06-18 | CRAN (R 3.4.2) |
| DelayedArray      | * 0.2.7    | 2017-10-13 | Bioconductor   |
| DESeq2            | * 1.16.1   | 2017-10-13 | Bioconductor   |
| devtools          | * 1.13.3   | 2017-08-02 | CRAN (R 3.4.2) |
| dichromat         | 2.0-0      | 2013-01-24 | CRAN (R 3.4.2) |
| digest            | 0.6.12     | 2017-01-27 | CRAN (R 3.4.2) |
| doParallel        | * 1.0.11   | 2017-09-28 | CRAN (R 3.4.2) |
| ensemblDb         | 2.0.4      | 2017-10-13 | Bioconductor   |
| evaluate          | 0.10.1     | 2017-06-24 | CRAN (R 3.4.2) |
| foreach           | * 1.4.3    | 2015-10-13 | CRAN (R 3.4.2) |
| foreign           | 0.8-69     | 2017-06-21 | CRAN (R 3.4.2) |
| formatR           | * 1.5      | 2017-04-25 | CRAN (R 3.4.2) |
| Formula           | 1.2-2      | 2017-07-10 | CRAN (R 3.4.2) |
| futile.logger     | * 1.4.3    | 2016-07-10 | CRAN (R 3.4.2) |
| futile.options    | 1.0.0      | 2010-04-06 | CRAN (R 3.4.2) |
| genefilter        | 1.58.1     | 2017-10-13 | Bioconductor   |
| genefilter        | 1.54.0     | 2017-10-13 | Bioconductor   |
| GenomeInfoDb      | * 1.12.3   | 2017-10-13 | Bioconductor   |
| GenomeInfoDbData  | 0.99.0     | 2017-10-13 | Bioconductor   |
| GenomicAlignments | * 1.12.2   | 2017-10-13 | Bioconductor   |
| GenomicFeatures   | 1.28.5     | 2017-10-13 | Bioconductor   |
| GenomicRanges     | * 1.28.6   | 2017-10-13 | Bioconductor   |

|                        |          |            |                |
|------------------------|----------|------------|----------------|
| GGally                 | 1.3.2    | 2017-08-02 | CRAN (R 3.4.2) |
| ggbio                  | * 1.24.1 | 2017-10-13 | Bioconductor   |
| ggplot2                | * 2.2.1  | 2016-12-30 | CRAN (R 3.4.2) |
| graph                  | 1.54.0   | 2017-10-13 | Bioconductor   |
| graphics               | * 3.4.2  | 2017-10-06 | local          |
| grDevices              | * 3.4.2  | 2017-10-06 | local          |
| grid                   | * 3.4.2  | 2017-10-06 | local          |
| gridExtra              | 2.3      | 2017-09-09 | CRAN (R 3.4.2) |
| gtable                 | 0.2.0    | 2016-02-26 | CRAN (R 3.4.2) |
| highr                  | 0.6      | 2016-05-09 | CRAN (R 3.4.2) |
| Hmisc                  | 4.0-3    | 2017-05-02 | CRAN (R 3.4.2) |
| hms                    | 0.3      | 2016-11-22 | CRAN (R 3.4.2) |
| htmlTable              | 1.9      | 2017-01-26 | CRAN (R 3.4.2) |
| htmltools              | 0.3.6    | 2017-04-28 | CRAN (R 3.4.2) |
| htmlwidgets            | 0.9      | 2017-07-10 | CRAN (R 3.4.2) |
| httpuv                 | 1.3.5    | 2017-07-04 | CRAN (R 3.4.2) |
| httr                   | 1.3.1    | 2017-08-20 | CRAN (R 3.4.2) |
| interactiveDisplayBase | 1.14.0   | 2017-10-13 | Bioconductor   |
| IRanges                | * 2.10.5 | 2017-10-13 | Bioconductor   |
| iterators              | * 1.0.8  | 2015-10-13 | CRAN (R 3.4.2) |
| kableExtra             | * 0.5.2  | 2017-09-15 | CRAN (R 3.4.2) |
| knitr                  | * 1.17   | 2017-08-10 | CRAN (R 3.4.2) |
| labeling               | 0.3      | 2014-08-23 | CRAN (R 3.4.2) |
| lambda.r               | 1.2      | 2017-09-16 | CRAN (R 3.4.2) |
| lattice                | 0.20-35  | 2017-03-25 | CRAN (R 3.4.2) |
| latticeExtra           | 0.6-28   | 2016-02-09 | CRAN (R 3.4.2) |
| lazyeval               | 0.2.0    | 2016-06-12 | CRAN (R 3.4.2) |
| locfit                 | 1.5-9.1  | 2013-04-20 | CRAN (R 3.4.2) |
| magrittr               | 1.5      | 2014-11-22 | CRAN (R 3.4.2) |
| Matrix                 | 1.2-11   | 2017-08-16 | CRAN (R 3.4.2) |
| matrixStats            | * 0.52.2 | 2017-04-14 | CRAN (R 3.4.2) |
| memoise                | 1.1.0    | 2017-04-21 | CRAN (R 3.4.2) |
| methods                | * 3.4.2  | 2017-10-06 | local          |
| mime                   | 0.5      | 2016-07-07 | CRAN (R 3.4.2) |
| munsell                | 0.4.3    | 2016-02-13 | CRAN (R 3.4.2) |
| nnet                   | 7.3-12   | 2016-02-02 | CRAN (R 3.4.2) |
| OrganismDbi            | 1.18.1   | 2017-10-13 | Bioconductor   |
| parallel               | * 3.4.2  | 2017-10-06 | local          |
| pheatmap               | * 1.0.8  | 2015-12-11 | CRAN (R 3.4.2) |
| plyr                   | * 1.8.4  | 2016-06-08 | CRAN (R 3.4.2) |
| ProtGenerics           | 1.8.0    | 2017-10-13 | Bioconductor   |
| R6                     | 2.2.2    | 2017-06-17 | CRAN (R 3.4.2) |
| RBGL                   | 1.52.0   | 2017-10-13 | Bioconductor   |
| RColorBrewer           | 1.1-2    | 2014-12-07 | CRAN (R 3.4.2) |
| Rcpp                   | 0.12.13  | 2017-09-28 | CRAN (R 3.4.2) |
| RCurl                  | 1.95-4.8 | 2016-03-01 | CRAN (R 3.4.2) |
| readr                  | 1.1.1    | 2017-05-16 | CRAN (R 3.4.2) |
| reshape                | * 0.8.7  | 2017-08-06 | CRAN (R 3.4.2) |
| reshape2               | * 1.4.2  | 2016-10-22 | CRAN (R 3.4.2) |
| rlang                  | 0.1.2    | 2017-08-09 | CRAN (R 3.4.2) |
| rmarkdown              | 1.6      | 2017-06-15 | CRAN (R 3.4.2) |
| rpart                  | 4.1-11   | 2017-04-21 | CRAN (R 3.4.2) |
| rprojroot              | 1.2      | 2017-01-16 | CRAN (R 3.4.2) |
| Rsamtools              | * 1.28.0 | 2017-10-13 | Bioconductor   |
| RSQLite                | 2.0      | 2017-06-19 | CRAN (R 3.4.2) |
| rtracklayer            | 1.36.6   | 2017-10-13 | Bioconductor   |
| rvest                  | 0.3.2    | 2016-06-17 | CRAN (R 3.4.2) |
| S4Vectors              | * 0.14.7 | 2017-10-13 | Bioconductor   |
| scales                 | 0.5.0    | 2017-08-24 | CRAN (R 3.4.2) |

|                      |          |            |                |
|----------------------|----------|------------|----------------|
| seqinr               | * 3.4-5  | 2017-08-01 | CRAN (R 3.4.2) |
| shiny                | 1.0.5    | 2017-08-23 | CRAN (R 3.4.2) |
| splines              | 3.4.2    | 2017-10-06 | local          |
| stats                | * 3.4.2  | 2017-10-06 | local          |
| stats4               | * 3.4.2  | 2017-10-06 | local          |
| stringi              | 1.1.5    | 2017-04-07 | CRAN (R 3.4.2) |
| stringr              | 1.2.0    | 2017-02-18 | CRAN (R 3.4.2) |
| SummarizedExperiment | * 1.6.5  | 2017-10-13 | Bioconductor   |
| survival             | 2.41-3   | 2017-04-04 | CRAN (R 3.4.2) |
| tibble               | 1.3.4    | 2017-08-22 | CRAN (R 3.4.2) |
| tools                | 3.4.2    | 2017-10-06 | local          |
| utils                | * 3.4.2  | 2017-10-06 | local          |
| VariantAnnotation    | 1.22.3   | 2017-10-13 | Bioconductor   |
| VennDiagram          | * 1.6.17 | 2016-04-18 | CRAN (R 3.4.2) |
| withr                | 2.0.0    | 2017-07-28 | CRAN (R 3.4.2) |
| XML                  | 3.98-1.9 | 2017-06-19 | CRAN (R 3.4.2) |
| xml2                 | 1.1.1    | 2017-01-24 | CRAN (R 3.4.2) |
| xtable               | 1.8-2    | 2016-02-05 | CRAN (R 3.4.2) |
| XVector              | * 0.16.0 | 2017-10-13 | Bioconductor   |
| yaml                 | 2.1.14   | 2016-11-12 | CRAN (R 3.4.2) |
| zlibbioc             | 1.22.0   | 2017-10-13 | Bioconductor   |
